# Supplementary material for: RAD51 May Regulate the Expression of Genes Involved in Autophagy Through Interaction with E-box Binding Proteins in Cancer Cell Lines
Source: Preprints.org preprint supplement (doi:10.20944/preprints202010.0452.v1), 2020-10-22
Supplement: Supplementary file 1 [file supplementary]

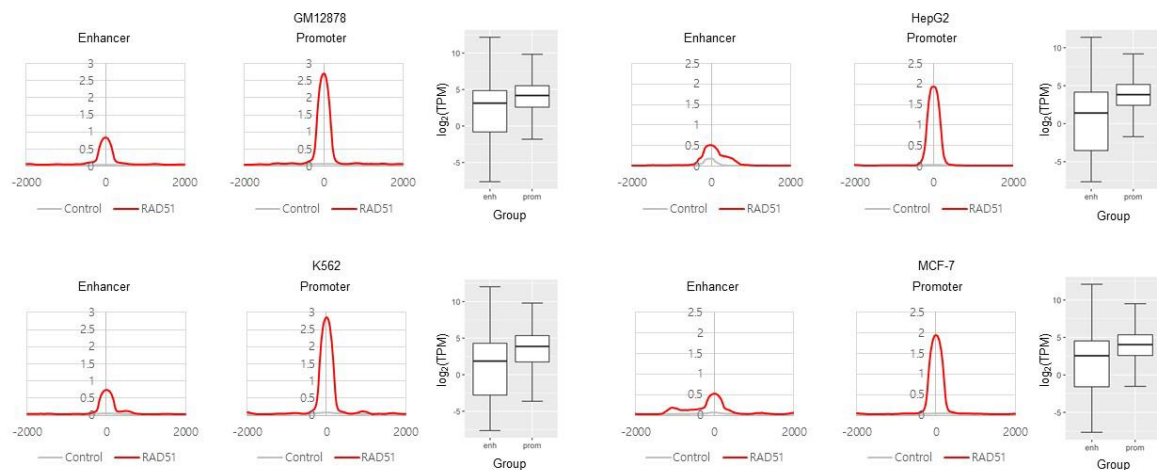

Figure S1. Characteristics of RAD51 binding sites in enhancer and promoter regions. Line plots show average enrichment of RAD51 binding at RAD51 binding sites in enhancer and promoter regions. Box plots show the expression level of genes closest to the RAD51 binding sites in enhancer and promoter regions.

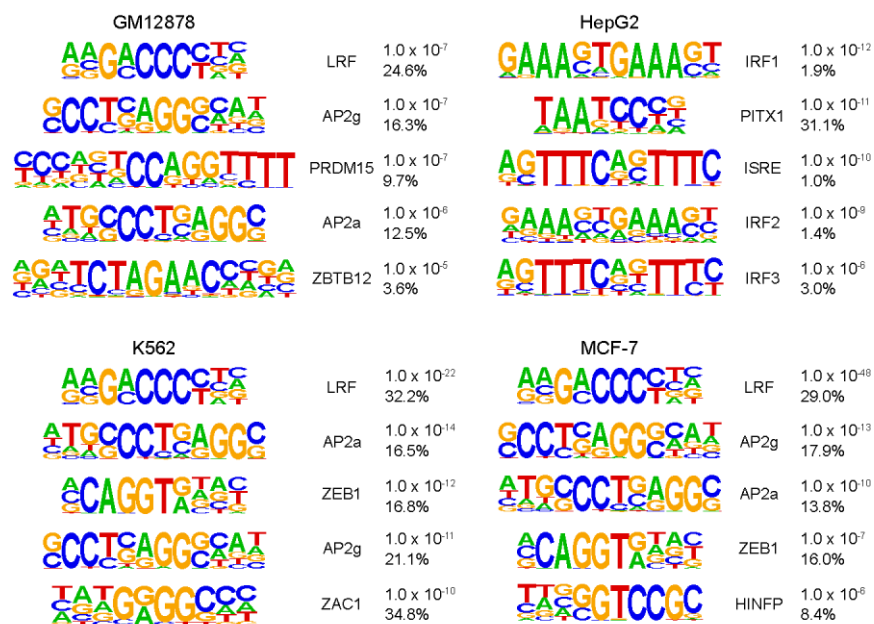

Figure S2. Motif analysis of H3K4me3-enriched regions. The top five motifs are shown.

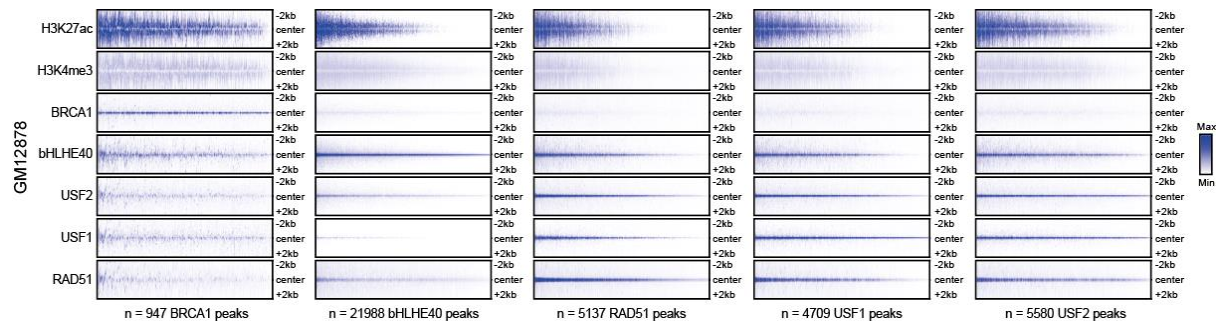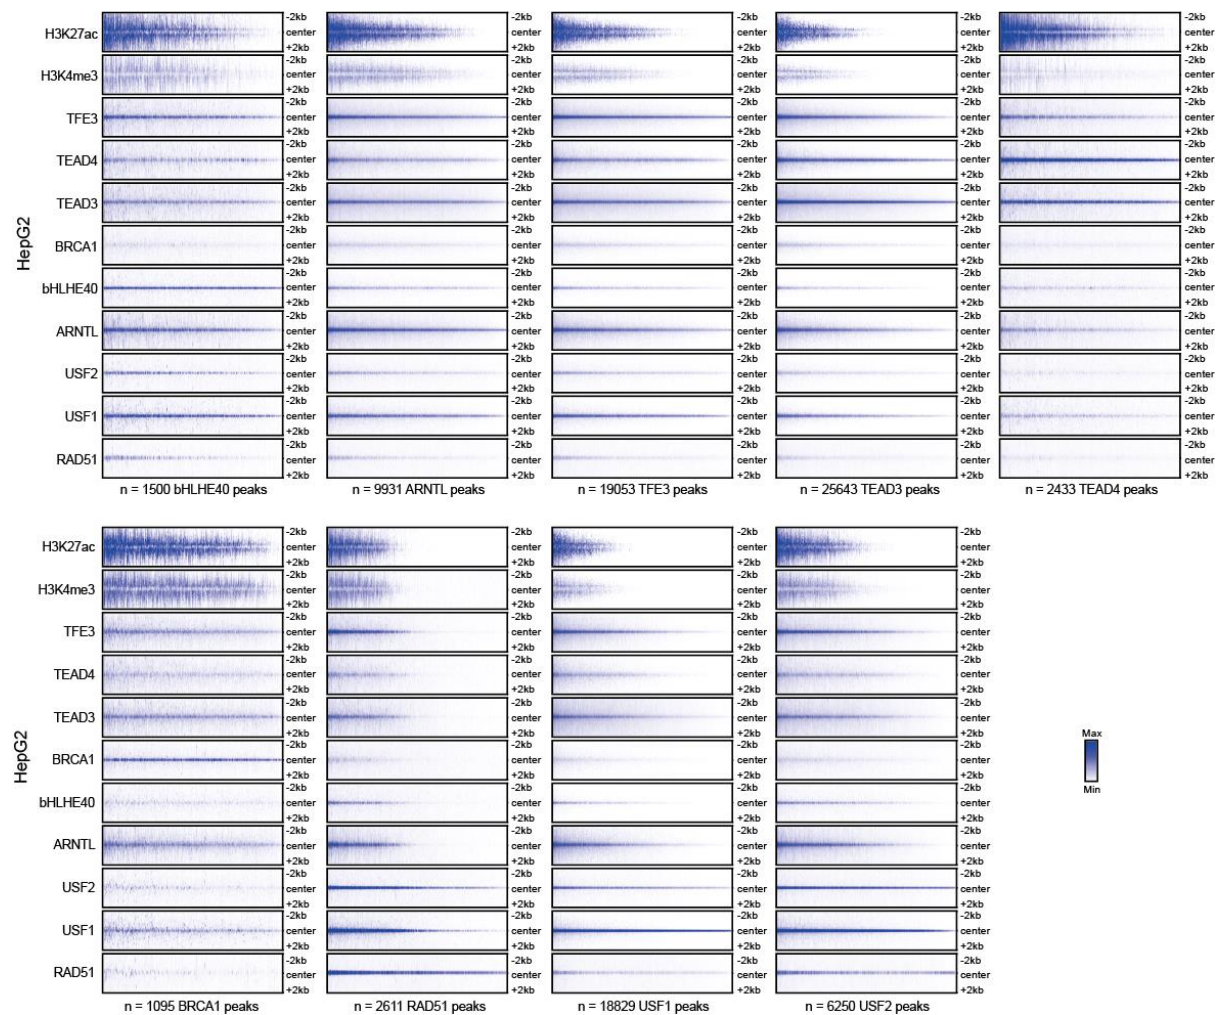

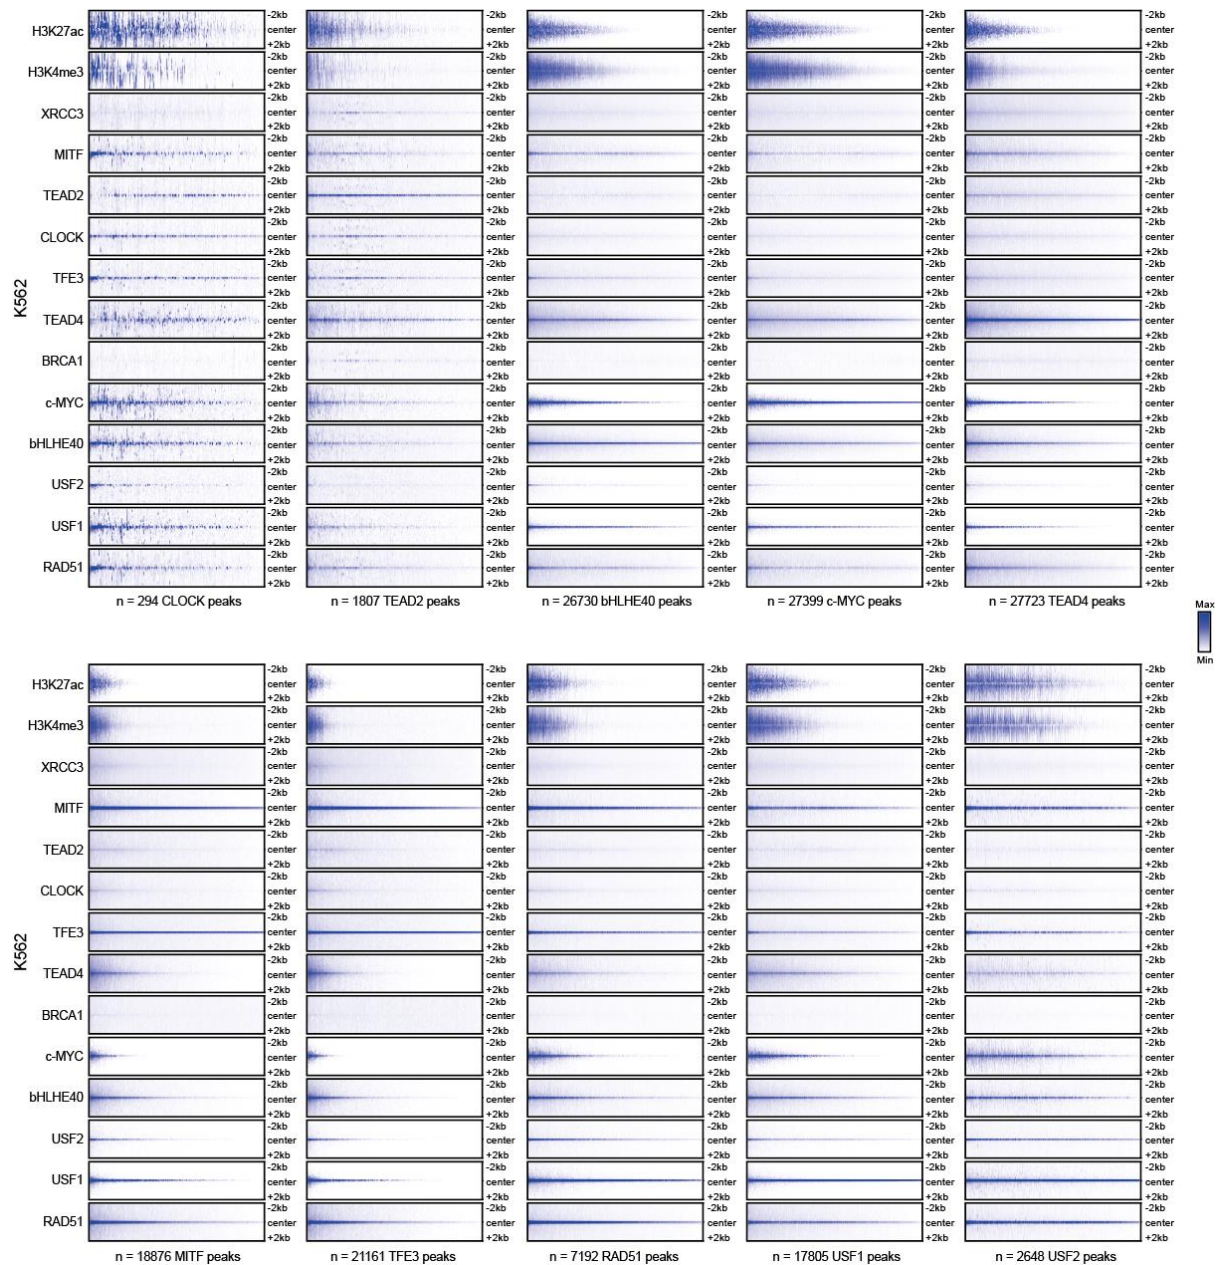

Figure S3 (continued). Comparative analysis of binding sites of RAD51- and E-box-related proteins. Heatmaps show enrichment of RAD51- and E-box-related proteins at the binding sites of a given protein (bottom) in K562 cells.

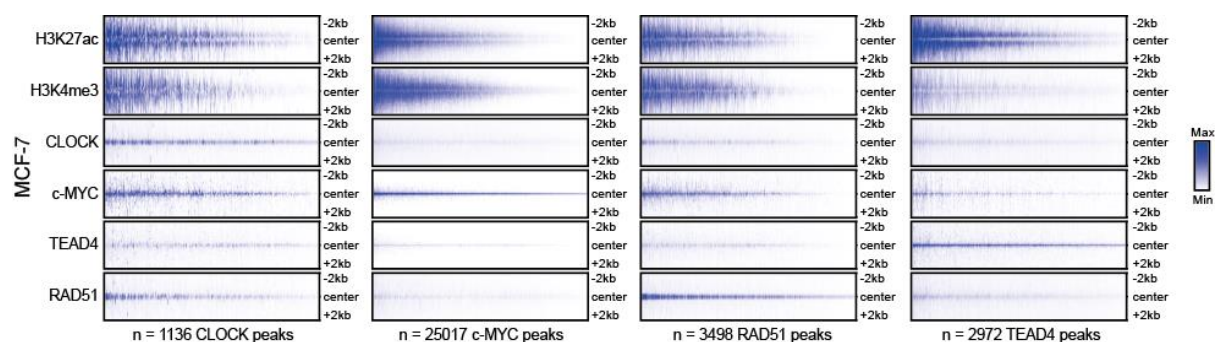

Figure S3 (continued). Comparative analysis of binding sites of RAD51- and E-box-related proteins. Heatmaps show enrichment of RAD51- and E-box-related proteins at the binding sites of a given protein (bottom) in MCF-7 cells.
