# Supplementary material for: RAD51 May Regulate the Expression of Genes Involved in Autophagy Through Interaction with E-box Binding Proteins in Cancer Cell Lines
Source: Preprints.org preprint supplement (doi:10.20944/preprints202010.0452.v1), 2020-10-22
Supplement: Supplementary file 1 [file supplementary]

## Sheet: GM12878
Table S2. RAD51 binding sites identified in GM12878, HepG2, K562 or MCF-7 cells.
PeakID	Chr	Start	End	Location	Annotation	Distance_to_TSS	Nearest_PromoterID	Entrez_ID	Nearest_Unigene	Nearest_Refseq	Nearest_Ensembl	Gene_Name	Gene_Alias	Gene_Description	Gene_Type	RPKM
chr7-1	chr7	876244	876513	Promoter	promoter-TSS (NM_015949)	-176	NM_015949	51608	Hs.107387	NM_015949	ENSG00000239857	GET4	C7orf20|CEE|CGI-20|TRC35	golgi to ER traffic protein 4	protein-coding	516.47
chr19-1	chr19	10653935	10654178	Promoter	promoter-TSS (NM_017620)	-184	NR_024333	147727	Hs.631616	NR_024333	ENSG00000267100	ILF3-DT	ILF3-AS1	ILF3 divergent tranacript	ncRNA	510.63
chr17-2	chr17	7012240	7012509	Promoter	promoter-TSS (NR_040089)	-40	NR_040089	100506713	Hs.422967	NR_040089	ENSG00000215067	ALOX12-AS1	-	ALOX12 antisense RNA 1	ncRNA	481.91
chr14-2	chr14	20455052	20455305	Promoter	promoter-TSS (NM_080648)	47	NM_080648	328	Hs.73722	NM_001641	ENSG00000100823	APEX1	APE|APE1|APEN|APEX|APX|HAP1|REF1	apurinic/apyrimidinic endodeoxyribonuclease 1	protein-coding	408.2
chr13-1	chr13	49110122	49110388	Promoter	promoter-TSS (NM_014923)	-48	NM_014923	22862	Hs.508010	NM_014923	ENSG00000102531	FNDC3A	FNDC3|HUGO|bA203I16.1|bA203I16.5	fibronectin type III domain containing 3A	protein-coding	405.43
chr11-1	chr11	65711882	65712151	Promoter	promoter-TSS (NM_006388)	14	NM_001206833	10524	Hs.397010	NM_006388	ENSG00000172977	KAT5	ESA1|HTATIP|HTATIP1|PLIP|TIP|TIP60|ZC2HC5|cPLA2	lysine acetyltransferase 5	protein-coding	383.89
chr17-3	chr17	7234476	7234738	Promoter	promoter-TSS (NM_004422)	-63	NM_004422	1856	Hs.118640	NM_004422	ENSG00000004975	DVL2	-	dishevelled segment polarity protein 2	protein-coding	381.78
chr19-3	chr19	40750409	40750678	Promoter	promoter-TSS (NM_001353805)	10	NM_001353807	284325	Hs.585105	NM_198476	ENSG00000188493	C19orf54	-	chromosome 19 open reading frame 54	protein-coding	365.16
chr19-4	chr19	3990256	3990518	Intergenic	MLT1J|LTR|ERVL-MaLR	-4924	NM_001961	1938	Hs.515070	NM_001961	ENSG00000167658	EEF2	EEF-2|EF-2|EF2|SCA26	eukaryotic translation elongation factor 2	protein-coding	336.57
chr10-1	chr10	50067738	50068007	Promoter	promoter-TSS (NM_001291398)	-16	NM_001330102	387680	Hs.365286	NM_018232	ENSG00000099290	WASHC2A	FAM21A|FAM21B|bA56A21.1|bA98I6.1	WASH complex subunit 2A	protein-coding	335.51
chr15-1	chr15	72375900	72376169	Promoter	promoter-TSS (NR_027262)	-79	NR_027262	80072	Hs.591113	NM_025005	ENSG00000260339	HEXA-AS1	C15orf34	HEXA antisense RNA 1	ncRNA	324.54
chr5-1	chr5	134370945	134371211	Promoter	promoter-TSS (NM_001300853)	-31	NM_001349364	51265	Hs.719926	NM_016508	ENSG00000006837	CDKL3	NKIAMRE	cyclin dependent kinase like 3	protein-coding	323.67
chr16-7	chr16	28491998	28492254	Promoter	promoter-TSS (NM_001286109)	-44	NM_000086	1201	Hs.534667	NM_000086	ENSG00000188603	CLN3	BTN1|BTS|JNCL	CLN3, battenin	protein-coding	318.04
chr17-1	chr17	74514393	74514560	Intergenic	(TGACAGG)n|Simple_repeat|Simple_repeat	16998	NM_174892	124599	Hs.313343	NM_174892	ENSG00000178789	CD300LB	CD300b|CLM-7|CLM7|CMRF35-A2|IREM-3|IREM3|TREM-5|TREM5	CD300 molecule like family member b	protein-coding	291.01
chr10-2	chr10	45727039	45727308	Promoter	promoter-TSS (NM_001169106)	-27	NM_001330074	253725	Hs.365286	NM_015262	ENSG00000172661	WASHC2C	FAM21A|FAM21C|VPEF	WASH complex subunit 2C	protein-coding	286.38
chr17-6	chr17	17972682	17972951	Promoter	promoter-TSS (NM_001130092)	3	NM_001130091	83450	Hs.579264	NM_031294	ENSG00000171962	DRC3	CFAP134|LRRC48	dynein regulatory complex subunit 3	protein-coding	281.9
chr9-2	chr9	114587588	114587857	Promoter	promoter-TSS (NM_004888)	8	NM_004888	9550	Hs.388654	NM_004888	ENSG00000136888	ATP6V1G1	ATP6G|ATP6G1|ATP6GL|ATP6J|Vma10	ATPase H+ transporting V1 subunit G1	protein-coding	270.44
chr22-1	chr22	22168591	22168860	Intergenic	Intergenic	-76055	NM_001303509	7441	Hs.247979	NM_007128	ENSG00000169575	VPREB1	CD179a|IGI|IGVPB|VPREB	V-set pre-B cell surrogate light chain 1	protein-coding	268.35
chr12-1	chr12	57752373	57752642	Promoter	promoter-TSS (NM_000075)	-60	NM_000075	1019	Hs.95577	NM_000075	ENSG00000135446	CDK4	CMM3|PSK-J3	cyclin dependent kinase 4	protein-coding	266.66
chr14-1	chr14	20461535	20461804	Promoter	promoter-TSS (NM_144568)	-57	NM_144568	90809	Hs.7001	NM_144568	ENSG00000165782	PIP4P1	C14orf9|TMEM55B	phosphatidylinositol-4,5-bisphosphate 4-phosphatase 1	protein-coding	260.11
chr1-12	chr1	110339057	110339324	Promoter	promoter-TSS (NM_022768)	-19	NR_036595	440600	Hs.649375	NR_036595	ENSG00000227963	RBM15-AS1	AS-RBM15	RBM15 antisense RNA 1	ncRNA	256.85
chr12-3	chr12	122266349	122266618	Promoter	promoter-TSS (NM_001351019)	-154	NM_001351018	65082	Hs.487883	NM_022916	ENSG00000139719	VPS33A	MPSPS	VPS33A, CORVET/HOPS core subunit	protein-coding	254.61
chr19-2	chr19	12722595	12722864	Promoter	promoter-TSS (NM_013433)	-81	NM_001136196	30000	Hs.416049	NM_013433	ENSG00000105576	TNPO2	IPO3|KPNB2B|TRN2	transportin 2	protein-coding	254.48
chr9-1	chr9	97922155	97922424	Promoter	CpG	281	NM_001330725	51531	Hs.9196	NM_016481	ENSG00000136932	TRMO	C9orf156|HSPC219|NAP1	tRNA methyltransferase O	protein-coding	252.47
chr12-2	chr12	55715898	55716167	Promoter	promoter-TSS (NR_037658)	-2	NR_037658	100528022	Hs.600940	NR_037658		BLOC1S1-RDH5	-	BLOC1S1-RDH5 readthrough	ncRNA	251.82
chr1-9	chr1	11806062	11806331	Promoter	promoter-TSS (NM_001286)	-93	NM_005957	4524	Hs.214142	NM_005957	ENSG00000177000	MTHFR	-	methylenetetrahydrofolate reductase	protein-coding	249.92
chr3-2	chr3	169940523	169940792	Intergenic	Intergenic	26077	NR_027622	100128164	Hs.633070	NR_024409	ENSG00000239219	LOC100128164	-	four and a half LIM domains 1 pseudogene	pseudo	247.64
chr6-1	chr6	84227570	84227839	Promoter	promoter-TSS (NM_001286206)	-69	NM_001286206	22832	Hs.485865	NM_014895	ENSG00000135315	CEP162	C6orf84|KIAA1009|QN1	centrosomal protein 162	protein-coding	242.38
chr1-10	chr1	202927219	202927488	Promoter	promoter-TSS (NM_001303109)	-81	NM_001303109	59349	Hs.706793	NM_021633	ENSG00000117153	KLHL12	C3IP1|DKIR	kelch like family member 12	protein-coding	227.38
chr13-2	chr13	113296887	113297156	Promoter	promoter-TSS (NM_005561)	-133	NM_005561	3916	Hs.494419	NM_005561	ENSG00000185896	LAMP1	CD107a|LAMPA|LGP120	lysosomal associated membrane protein 1	protein-coding	227.16
chr19-5	chr19	40348409	40348678	Promoter	promoter-TSS (NM_001256441)	-16	NM_001256440	126526	Hs.631557	NM_178830	ENSG00000160392	C19orf47	-	chromosome 19 open reading frame 47	protein-coding	223.33
chr1-13	chr1	154558726	154558995	Promoter	promoter-TSS (NM_017582)	-216	NM_017582	55585	Hs.607928	NM_017582	ENSG00000160714	UBE2Q1	GTAP|NICE-5|NICE5|PRO3094|UBE2Q	ubiquitin conjugating enzyme E2 Q1	protein-coding	220.32
chr19-10	chr19	7522459	7522728	Promoter	promoter-TSS (NM_020533)	-17	NM_020533	57192	Hs.631858	NM_020533	ENSG00000090674	MCOLN1	MG-2|ML1|ML4|MLIV|MST080|MSTP080|TRP-ML1|TRPM-L1|TRPML1	mucolipin 1	protein-coding	216.06
chr17-4	chr17	48610909	48611178	Promoter	promoter-TSS (NM_004502)	-22	NM_004502	3217	Hs.436181	NM_004502	ENSG00000260027	HOXB7	HHO.C1|HOX2|HOX2C|Hox-2.3	homeobox B7	protein-coding	215.3
chr16-12	chr16	57186064	57186332	Promoter	promoter-TSS (NM_001354096)	-82	NM_001354095	80011	Hs.396740	NM_024946	ENSG00000172775	FAM192A	C16orf94|CDA018|CDA10|NIP30	family with sequence similarity 192 member A	protein-coding	209.64
chr4-3	chr4	17614416	17614685	Promoter	promoter-TSS (NM_025205)	-78	NM_025205	80306	Hs.731966	NM_025205	ENSG00000118579	MED28	1500003D12Rik|EG1|magicin	mediator complex subunit 28	protein-coding	207.79
chr14-3	chr14	101948221	101948490	Intergenic	CpG	-16173	NM_001376	1778	Hs.614080	NM_001376	ENSG00000197102	DYNC1H1	CMT2O|DHC1|DHC1a|DNCH1|DNCL|DNECL|DYHC|Dnchc1|HL-3|SMALED1|p22	dynein cytoplasmic 1 heavy chain 1	protein-coding	206.91
chr12-4	chr12	120317662	120317927	Intergenic	CpG	9995	NM_000928	5319	Hs.992	NM_000928	ENSG00000170890	PLA2G1B	PLA2|PLA2A|PPLA2	phospholipase A2 group IB	protein-coding	206.57
chr19-7	chr19	48954602	48954871	Promoter	promoter-TSS (NM_138761)	-124	NR_027882	581	Hs.624291	NM_004324	ENSG00000087088	BAX	BCL2L4	BCL2 associated X, apoptosis regulator	protein-coding	199.82
chr10-3	chr10	69179838	69180107	Promoter	promoter-TSS (NR_136626)	-232	NR_136626	6832	Hs.106469	NM_003171	ENSG00000156502	SUPV3L1	SUV3	Suv3 like RNA helicase	protein-coding	197.17
chr3-5	chr3	155854580	155854849	Promoter	promoter-TSS (NM_004733)	-255	NM_004733	9197	Hs.478031	NM_004733	ENSG00000169359	SLC33A1	ACATN|AT-1|AT1|CCHLND|SPG42	solute carrier family 33 member 1	protein-coding	195.64
chr14-4	chr14	67816572	67816841	Promoter	promoter-TSS (NM_015346)	-117	NM_015346	23503	Hs.98041	NM_015346	ENSG00000072121	ZFYVE26	FYVE-CENT|SPG15	zinc finger FYVE-type containing 26	protein-coding	186.94
chr1-11	chr1	155241145	155241414	Promoter	promoter-TSS (NM_001171812)	-1	NM_000157	2629	Hs.282997	NM_000157	ENSG00000177628	GBA	GBA1|GCB|GLUC	glucosylceramidase beta	protein-coding	186.83
chr6-2	chr6	87155393	87155658	Promoter	promoter-TSS (NM_001351444)	-24	NM_001351444	23036	Hs.444800	NM_015021	ENSG00000188994	ZNF292	Nbla00365|ZFP292|ZN-16|Zn-15|bA393I2.3	zinc finger protein 292	protein-coding	182.68
chr7-2	chr7	4775462	4775731	Promoter	promoter-TSS (NM_014855)	-35	NM_014855	9907	Hs.558440	NM_014855	ENSG00000242802	AP5Z1	KIAA0415|SPG48|zeta	adaptor related protein complex 5 subunit zeta 1	protein-coding	180.61
chr15-2	chr15	74100122	74100391	Intergenic	CpG	-17706	NM_001038640	342096	Hs.546408	NM_001038640	ENSG00000159289	GOLGA6A	GLP|GOLGA6	golgin A6 family member A	protein-coding	176.67
chr3-3	chr3	112561824	112562093	Promoter	promoter-TSS (NM_017945)	5	NM_001278712	64422	Hs.477126	NM_022488	ENSG00000144848	ATG3	APG3|APG3-LIKE|APG3L|PC3-96	autophagy related 3	protein-coding	175.7
chr17-9	chr17	7332694	7332963	Intergenic	LTR13A|LTR|ERVK	-3509	NM_032442	84461	Hs.654794	NM_032442	ENSG00000215041	NEURL4	-	neuralized E3 ubiquitin protein ligase 4	protein-coding	172.99
chrX-3	chrX	12950208	12950476	Intergenic	Intergenic	-7042	NR_030727	349408	Hs.685035	NR_030727	ENSG00000233338	TLR8-AS1	GS1-324M7.6	TLR8 antisense RNA 1	ncRNA	169.68
chr20-1	chr20	45891166	45891434	Promoter	promoter-TSS (NM_001278535)	-13	NM_080749	140825	Hs.517094	NM_080749	ENSG00000124257	NEURL2	C20orf163|OZZ|OZZ-E3	neuralized E3 ubiquitin protein ligase 2	protein-coding	166.44
chr6-4	chr6	151452094	151452362	Promoter	promoter-TSS (NM_001286562)	-30	NM_001286562	79624	Hs.15929	NM_024573	ENSG00000146476	ARMT1	C6orf211	acidic residue methyltransferase 1	protein-coding	164.94
chr14-6	chr14	74084808	74085071	Promoter	promoter-TSS (NM_001278594)	-14	NM_001024674	91750	Hs.612866	NM_001024674	ENSG00000205659	LIN52	C14orf46|c14_5549	lin-52 DREAM MuvB core complex component	protein-coding	159.56
chr13-3	chr13	30395465	30395734	Intergenic	Intergenic	-21685	NR_024464	100188949	Hs.439791	NR_024464	ENSG00000238121	LINC00426	-	long intergenic non-protein coding RNA 426	ncRNA	158.98
chr8-1	chr8	53843145	53843414	Promoter	promoter-TSS (NM_213619)	32	NM_015941	51606	Hs.491737	NM_015941	ENSG00000047249	ATP6V1H	CGI-11|MSTP042|NBP1|SFD|SFDalpha|SFDbeta|VMA13	ATPase H+ transporting V1 subunit H	protein-coding	157.35
chr5-4	chr5	151447457	151447726	Promoter	promoter-TSS (NM_001308150)	-5	NM_001308150	206358	Hs.269004	NM_078483	ENSG00000123643	SLC36A1	Dct1|LYAAT1|PAT1|TRAMD3	solute carrier family 36 member 1	protein-coding	155.82
chr14-5	chr14	24213465	24213734	Promoter	TTS (NM_001199823)	231	NM_014169	29082	Hs.279761	NM_014169	ENSG00000254505	CHMP4A	C14orf123|CHMP4|CHMP4B|HSPC134|SHAX2|SNF7|SNF7-1|VPS32-1|VPS32A	charged multivesicular body protein 4A	protein-coding	154.74
chr12-5	chr12	48716796	48717065	Promoter	promoter-TSS (NM_001240)	68	NM_001240	904	Hs.92308	NM_001240	ENSG00000129315	CCNT1	CCNT|CYCT1|HIVE1	cyclin T1	protein-coding	153.51
chr5-3	chr5	41904194	41904463	Promoter	promoter-TSS (NM_175921)	-16	NM_175921	285636	Hs.29899	NM_175921	ENSG00000205765	C5orf51	-	chromosome 5 open reading frame 51	protein-coding	152.22
chr9-4	chr9	5594030	5594299	Intergenic	Intergenic	-34955	NM_001135920	57589	Hs.211520	NM_020829	ENSG00000107036	RIC1	CIP150|KIAA1432|bA207C16.1	RIC1 homolog, RAB6A GEF complex partner 1	protein-coding	151.93
chr7-3	chr7	44490804	44491069	Promoter	promoter-TSS (NM_015332)	-150	NM_015332	23386	Hs.488171	NM_015332	ENSG00000015676	NUDCD3	NudCL	NudC domain containing 3	protein-coding	149.89
chr9-3	chr9	6704107	6704376	Intergenic	CpG	-16622	NM_001146696	23081	Hs.709425	NM_015061	ENSG00000107077	KDM4C	GASC1|JHDM3C|JMJD2C|TDRD14C	lysine demethylase 4C	protein-coding	149.81
chr17-10	chr17	50372857	50373119	Promoter	promoter-TSS (NM_001166131)	213	NM_016504	51264	Hs.7736	NM_016504	ENSG00000108826	MRPL27	L27mt	mitochondrial ribosomal protein L27	protein-coding	149.32
chr11-3	chr11	75814719	75814988	Promoter	promoter-TSS (NM_003369)	-56	NR_144531	100506113	Hs.720913	NR_144531	ENSG00000255507	LOC100506113	-	uncharacterized LOC100506113	ncRNA	148.09
chr22-2	chr22	30969037	30969306	Promoter	promoter-TSS (NM_014941)	-40	NR_110493	55000	Hs.554829	NR_002323	ENSG00000253352	TUG1	LINC00080|NCRNA00080|TI-227H	taurine up-regulated 1 (non-protein coding)	ncRNA	147.9
chr11-6	chr11	126211580	126211849	Promoter	promoter-TSS (NM_001144827)	-10	NM_001330446	79607	Hs.276315	NM_024556	ENSG00000197798	FAM118B	-	family with sequence similarity 118 member B	protein-coding	147.12
chr3-6	chr3	20186183	20186451	Promoter	promoter-TSS (NM_138484)	-84	NM_001199253	151648	Hs.105153	NM_138484	ENSG00000129810	SGO1	CAID|NY-BR-85|SGO|SGOL1	shugoshin 1	protein-coding	144.44
chr17-16	chr17	7046883	7047152	Intergenic	LTR13A|LTR|ERVK	-3094	NM_153357	162515	Hs.336564	NM_153357	ENSG00000174326	SLC16A11	MCT11	solute carrier family 16 member 11	protein-coding	143.96
chr15-3	chr15	75335903	75336172	Promoter	promoter-TSS (NM_001321848)	41	NM_001284377	54939	Hs.351327	NM_017828	ENSG00000140365	COMMD4	-	COMM domain containing 4	protein-coding	143.74
chr11-7	chr11	67391738	67392007	Promoter	promoter-TSS (NM_004584)	-80	NM_004584	5883	Hs.655354	NM_004584	ENSG00000172613	RAD9A	RAD9	RAD9 checkpoint clamp component A	protein-coding	142.91
chr8-2	chr8	103415204	103415473	Promoter	promoter-TSS (NR_102338)	-3	NM_030780	81034	Hs.532265	NM_030780	ENSG00000164933	SLC25A32	MFT|MFTC|RREI	solute carrier family 25 member 32	protein-coding	140.71
chr11-5	chr11	36289299	36289568	Promoter	promoter-TSS (NM_001101653)	16	NM_001307932	29099	Hs.99443	NM_014186	ENSG00000110442	COMMD9	C11orf55|HSPC166|LINC00610	COMM domain containing 9	protein-coding	140.28
chr20-2	chr20	4815033	4815302	Promoter	promoter-TSS (NM_170774)	-44	NM_170774	9770	Hs.631504	NM_014737	ENSG00000101265	RASSF2	CENP-34|RASFADIN	Ras association domain family member 2	protein-coding	140.04
chr7-4	chr7	100673368	100673637	Promoter	promoter-TSS (NM_005273)	-238	NM_005273	2783	Hs.185172	NM_005273	ENSG00000172354	GNB2	-	G protein subunit beta 2	protein-coding	138.72
chrX-2	chrX	101408074	101408343	Promoter	promoter-TSS (NM_019597)	75	NM_001032393	3188	Hs.432485	NM_019597	ENSG00000126945	HNRNPH2	FTP3|HNRPH'|HNRPH2|MRXSB|NRPH2|hnRNPH'	heterogeneous nuclear ribonucleoprotein H2	protein-coding	135.77
chr12-6	chr12	112013249	112013518	Promoter	promoter-TSS (NM_001193453)	35	NM_001034025	10961	Hs.75841	NM_006817	ENSG00000089248	ERP29	C12orf8|ERp28|ERp31|HEL-S-107|PDI-DB|PDIA9	endoplasmic reticulum protein 29	protein-coding	134.4
chr11-2	chr11	6619284	6619553	Promoter	promoter-TSS (NM_000391)	43	NM_000391	1200	Hs.523454	NM_000391	ENSG00000166340	TPP1	CLN2|GIG1|LPIC|SCAR7|TPP-1	tripeptidyl peptidase 1	protein-coding	134.24
chr16-14	chr16	67481040	67481309	Promoter	promoter-TSS (NM_004691)	12	NM_004691	9114	Hs.106876	NM_004691	ENSG00000159720	ATP6V0D1	ATP6D|ATP6DV|P39|VATX|VMA6|VPATPD	ATPase H+ transporting V0 subunit d1	protein-coding	132.1
chr17-11	chr17	49764323	49764592	Promoter	promoter-TSS (NM_030802)	-301	NM_030802	81558	Hs.514308	NM_030802	ENSG00000121104	FAM117A	-	family with sequence similarity 117 member A	protein-coding	131.26
chr19-9	chr19	18022190	18022459	Intergenic	MLT1K|LTR|ERVL-MaLR	14156	NM_001286826	27106	Hs.515249	NM_015683	ENSG00000105643	ARRDC2	CLONE24945|PP2703	arrestin domain containing 2	protein-coding	130.84
chr1-40	chr1	8169788	8170057	Intergenic	Intergenic	-38750	NR_125998	102724539	Hs.516816	NR_125998	ENSG00000227634	LINC01714	-	long intergenic non-protein coding RNA 1714	ncRNA	129.55
chr11-4	chr11	18322384	18322653	Promoter	promoter-TSS (NM_007216)	249	NM_001142307	2965	Hs.577202	NM_005316	ENSG00000110768	GTF2H1	BTF2|P62|TFB1|TFIIH	general transcription factor IIH subunit 1	protein-coding	128.13
chr1-18	chr1	28232894	28233163	Promoter	promoter-TSS (NM_014280)	3	NM_014280	22826	Hs.433540	NM_014280	ENSG00000126698	DNAJC8	HSPC331|SPF31	DnaJ heat shock protein family (Hsp40) member C8	protein-coding	124.21
chr11-9	chr11	86069024	86069293	Promoter	promoter-TSS (NM_001206946)	-61	NM_001008660	8301	Hs.163893	NM_007166	ENSG00000073921	PICALM	CALM|CLTH|LAP	phosphatidylinositol binding clathrin assembly protein	protein-coding	122.81
chr16-15	chr16	5033816	5034085	Promoter	promoter-TSS (NM_016256)	-9	NM_016256	51172	Hs.21334	NM_016256	ENSG00000103174	NAGPA	APAA|UCE	N-acetylglucosamine-1-phosphodiester alpha-N-acetylglucosaminidase	protein-coding	122.76
chr19-8	chr19	36054302	36054571	Promoter	promoter-TSS (NM_001083961)	326	NM_152658	199745	Hs.350209	NM_152658	ENSG00000161277	THAP8	-	THAP domain containing 8	protein-coding	120.83
chr1-22	chr1	111200130	111200399	Promoter	intron (NM_001271833, intron 1 of 11)	439	NM_024901	79961	Hs.557850	NM_024901	ENSG00000162777	DENND2D	-	DENN domain containing 2D	protein-coding	120.34
chr8-3	chr8	108443477	108443746	Promoter	promoter-TSS (NM_014673)	28	NM_001329493	9694	Hs.654351	NM_014673	ENSG00000104412	EMC2	KIAA0103|TTC35	ER membrane protein complex subunit 2	protein-coding	120.08
chr19-13	chr19	12681782	12682050	Promoter	promoter-TSS (NR_038192)	-29	NM_013406	1725	Hs.79064	NM_001930	ENSG00000095059	DHPS	DHS|DS|MIG13	deoxyhypusine synthase	protein-coding	120.04
chr16-17	chr16	31033163	31033429	Promoter	promoter-TSS (NM_004604)	-195	NM_004604	6810	Hs.83734	NM_004604	ENSG00000103496	STX4	STX4A|p35-2	syntaxin 4	protein-coding	119.91
chr12-9	chr12	110590848	110591117	Intergenic	Intergenic	-7723	NM_139283	160760	Hs.13854	NM_139283	ENSG00000196850	PPTC7	TA-PP2C|TAPP2C	PTC7 protein phosphatase homolog	protein-coding	119
chr9-6	chr9	122905366	122905635	Promoter	promoter-TSS (NM_001354486)	-149	NM_018835	54542	Hs.533499	NM_018835	ENSG00000056586	RC3H2	MNAB|RNF164	ring finger and CCCH-type domains 2	protein-coding	118.17
chr3-7	chr3	122793722	122793991	Promoter	promoter-TSS (NM_024610)	-29	NM_001320728	79663	Hs.29169	NM_024610	ENSG00000169087	HSPBAP1	PASS1	HSPB1 associated protein 1	protein-coding	118.01
chr16-18	chr16	28974576	28974841	Promoter	promoter-TSS (NM_001142450)	-67	NM_032038	83985	Hs.617449	NM_032038	ENSG00000169682	SPNS1	HSpin1|LAT|PP2030|SPIN1|SPINL|nrs	sphingolipid transporter 1 (putative)	protein-coding	117.61
chr22-3	chr22	50534429	50534698	Promoter	LTR13A|LTR|ERVK	-1984	NM_001014440	440836	Hs.531314	NM_001014440	ENSG00000177989	ODF3B	ODF3L3	outer dense fiber of sperm tails 3B	protein-coding	116.64
chr3-4	chr3	4467145	4467414	Promoter	promoter-TSS (NM_001164674)	3	NM_182760	285362	Hs.350475	NM_182760	ENSG00000144455	SUMF1	AAPA3037|FGE|UNQ3037	sulfatase modifying factor 1	protein-coding	116.35
chr1-38	chr1	166876309	166876578	Promoter	promoter-TSS (NM_053053)	-26	NM_053053	117143	Hs.435967	NM_053053	ENSG00000152382	TADA1	ADA1|HFI1|STAF42|TADA1L|hADA1	transcriptional adaptor 1	protein-coding	115.86
chr2-2	chr2	189441038	189441304	Promoter	promoter-TSS (NM_001303096)	-262	NM_001303096	84128	Hs.399984	NM_032168	ENSG00000115368	WDR75	NET16|UTP17	WD repeat domain 75	protein-coding	113.53
chr11-10	chr11	72103362	72103631	Promoter	promoter-TSS (NM_017907)	-109	NM_017907	55004	Hs.731528	NM_017907	ENSG00000149357	LAMTOR1	C11orf59|PDRO|Ragulator1|p18|p27RF-Rho	late endosomal/lysosomal adaptor, MAPK and MTOR activator 1	protein-coding	111.44
chr4-7	chr4	163550278	163550547	Genebody	intron (NM_017923, intron 2 of 3)	55891	NM_018352	55319	Hs.267446	NM_018352	ENSG00000198498	TMA16	C4orf43	translation machinery associated 16 homolog	protein-coding	110.85
chr4-5	chr4	47463579	47463848	Promoter	promoter-TSS (NM_001329668)	17	NM_001329668	54951	Hs.23956	NM_017845	ENSG00000169019	COMMD8	-	COMM domain containing 8	protein-coding	110.23
chr19-6	chr19	47515265	47515534	Promoter	promoter-TSS (NR_038456)	-141	NR_038456	8775	Hs.126938	NM_003827	ENSG00000105402	NAPA	SNAPA	NSF attachment protein alpha	protein-coding	108.05
chr5-7	chr5	150477475	150477737	Genebody	intron (NR_105061, intron 2 of 2)	8386	NR_105061	102546298	Hs.570892	NR_105061	ENSG00000254333	NDST1-AS1	-	NDST1 antisense RNA 1	ncRNA	107.72
chr1-31	chr1	203795366	203795635	Promoter	promoter-TSS (NM_001319239)	-37	NM_001319238	9877	Hs.532399	NM_014827	ENSG00000058673	ZC3H11A	ZC3HDC11A	zinc finger CCCH-type containing 11A	protein-coding	107.46
chr6-3	chr6	33418119	33418278	Promoter	promoter-TSS (NM_015921).2	90	NM_001014433	51596	Hs.520070	NM_015921	ENSG00000112514	CUTA	ACHAP|C6orf82	cutA divalent cation tolerance homolog	protein-coding	107.45
chr16-19	chr16	1827086	1827355	Promoter	promoter-TSS (NM_001142398)	-4	NM_001142398	81889	Hs.513265	NM_031208	ENSG00000180185	FAHD1	C16orf36|YISKL	fumarylacetoacetate hydrolase domain containing 1	protein-coding	106.69
chr3-10	chr3	19946840	19947109	Promoter	promoter-TSS (NM_001292048)	51	NM_001330688	151651	Hs.733920	NM_144715	ENSG00000163576	EFHB	CFAP21	EF-hand domain family member B	protein-coding	105.64
chr1-36	chr1	222712647	222712910	Promoter	promoter-TSS (NM_022831)	225	NR_109927	148362	Hs.534965	NM_144695	ENSG00000162819	BROX	C1orf58	BRO1 domain and CAAX motif containing	protein-coding	105.58
chr17-19	chr17	75979311	75979577	Promoter	promoter-TSS (NM_007292)	-10	NM_001185039	51	Hs.464137	NM_004035	ENSG00000161533	ACOX1	ACOX|PALMCOX|SCOX	acyl-CoA oxidase 1	protein-coding	105.5
chr17-8	chr17	3636526	3636795	Promoter	promoter-TSS (NM_013276)	192	NM_004937	1497	Hs.187667	NM_004937	ENSG00000040531	CTNS	CTNS-LSB|PQLC4	cystinosin, lysosomal cystine transporter	protein-coding	104.19
chrX-4	chrX	55717581	55717850	Promoter	promoter-TSS (NR_148687)	38	NR_148687	10325	Hs.50282	NM_006064	ENSG00000083750	RRAGB	RAGB|bA465E19.1	Ras related GTP binding B	protein-coding	104.08
chr17-18	chr17	7242846	7243112	Promoter	promoter-TSS (NM_007278)	-545	NM_007278	11337	Hs.647421	NM_007278	ENSG00000170296	GABARAP	ATG8A|GABARAP-a|MM46	GABA type A receptor-associated protein	protein-coding	102.27
chr11-8	chr11	119067629	119067898	Promoter	promoter-TSS (NM_001290185)	11	NM_021729	55823	Hs.234282	NM_021729	ENSG00000160695	VPS11	END1|HLD12|PEP5|RNF108|hVPS11	VPS11, CORVET/HOPS core subunit	protein-coding	101.86
chr9-8	chr9	6757726	6757994	Promoter	non-coding (NR_130707, exon 1 of 15)	510	NM_001354000	23081	Hs.709425	NM_015061	ENSG00000107077	KDM4C	GASC1|JHDM3C|JMJD2C|TDRD14C	lysine demethylase 4C	protein-coding	101.81
chr21-2	chr21	37221246	37221515	Genebody	non-coding (NR_026719, exon 3 of 3)	12877	NR_026719	257203	Hs.505159	NM_148675	ENSG00000230366	DSCR9	NCRNA00038	Down syndrome critical region 9 (non-protein coding)	ncRNA	100.73
chr6-5	chr6	159074376	159074645	Intergenic	MLT1J|LTR|ERVL-MaLR	-29358	NM_054114	117289	Hs.529984	NM_054114	ENSG00000164691	TAGAP	ARHGAP47|FKSG15|IDDM21|TAGAP1	T cell activation RhoGTPase activating protein	protein-coding	100.62
chr20-3	chr20	20603360	20603629	Genebody	MLT1H|LTR|ERVL-MaLR	109129	NM_020343	57186	Hs.472285	NM_020343	ENSG00000188559	RALGAPA2	AS250|C20orf74|bA287B20.1|dJ1049G11|dJ1049G11.4|p220	Ral GTPase activating protein catalytic alpha subunit 2	protein-coding	100.49
chr1-27	chr1	43974770	43975039	Promoter	5' UTR (NM_001294333, exon 1 of 7)	256	NM_001039457	533	Hs.596514	NM_004047	ENSG00000117410	ATP6V0B	ATP6F|HATPL|VMA16	ATPase H+ transporting V0 subunit b	protein-coding	98.31
chr19-15	chr19	10701248	10701517	Promoter	promoter-TSS (NM_031209)	-54	NM_031209	81890	Hs.631638	NM_031209	ENSG00000213339	QTRT1	FP3235|TGT|TGUT	queuine tRNA-ribosyltransferase catalytic subunit 1	protein-coding	96.89
chr19-14	chr19	797026	797295	Promoter	promoter-TSS (NM_031991)	-232	NM_031990	5725	Hs.172550	NM_002819	ENSG00000011304	PTBP1	HNRNP-I|HNRNPI|HNRPI|PTB|PTB-1|PTB-T|PTB2|PTB3|PTB4|pPTB	polypyrimidine tract binding protein 1	protein-coding	96.41
chr3-8	chr3	119638899	119639168	Intergenic	Intergenic	21557	NM_001308333	64091	Hs.534383	NM_022135	ENSG00000121577	POPDC2	POP2	popeye domain containing 2	protein-coding	95.6
chr17-20	chr17	82497105	82497374	Intergenic	CpG	-22479	NM_004514	3607	Hs.591140	NM_004514	ENSG00000141568	FOXK2	ILF|ILF-1|ILF1	forkhead box K2	protein-coding	94.07
chr2-3	chr2	46698679	46698948	Promoter	promoter-TSS (NM_014011)	-147	NM_014011	9655	Hs.468426	NM_014011	ENSG00000171150	SOCS5	CIS6|CISH6|Cish5|SOCS-5	suppressor of cytokine signaling 5	protein-coding	93.86
chr10-5	chr10	69124011	69124280	Promoter	promoter-TSS (NM_004896)	-8	NM_001318945	9559	Hs.499925	NM_004896	ENSG00000122958	VPS26A	HB58|Hbeta58|PEP8A|VPS26	VPS26, retromer complex component A	protein-coding	93.73
chr17-23	chr17	80263469	80263738	Genebody	5' UTR (NM_001256071, exon 2 of 68)	2742	NM_020954	57674	Hs.195642	NM_020914	ENSG00000173821	RNF213	ALO17|C17orf27|KIAA1618|MYMY2|MYSTR|NET57	ring finger protein 213	protein-coding	93.27
chr1-34	chr1	15526669	15526938	Promoter	promoter-TSS (NR_109898)	-10	NM_015291	23341	Hs.655410	NM_015291	ENSG00000116138	DNAJC16	-	DnaJ heat shock protein family (Hsp40) member C16	protein-coding	92.92
chr12-8	chr12	64759321	64759590	Promoter	promoter-TSS (NM_002076)	-9	NM_002076	2799	Hs.334534	NM_002076	ENSG00000135677	GNS	G6S	glucosamine (N-acetyl)-6-sulfatase	protein-coding	92.87
chr16-22	chr16	58684628	58684897	Promoter	promoter-TSS (NM_001308384)	15	NM_018231	55238	Hs.10499	NM_018231	ENSG00000103042	SLC38A7	SNAT7	solute carrier family 38 member 7	protein-coding	92.87
chr5-6	chr5	150758888	150759157	Promoter	promoter-TSS (NM_001135644)	73	NM_016221	51164	Hs.675564	NM_016221	ENSG00000132912	DCTN4	DYN4|P62	dynactin subunit 4	protein-coding	92.2
chr19-16	chr19	47130565	47130834	Promoter	promoter-TSS (NR_027280)	-124	NM_005500	10055	Hs.515500	NM_005500	ENSG00000142230	SAE1	AOS1|HSPC140|SUA1|UBLE1A	SUMO1 activating enzyme subunit 1	protein-coding	91.04
chr10-4	chr10	68720849	68721118	Promoter	promoter-TSS (NR_104262)	-161	NM_001282959	55749	Hs.49853	NM_018237	ENSG00000060339	CCAR1	-	cell division cycle and apoptosis regulator 1	protein-coding	90.99
chr17-14	chr17	75855318	75855587	Promoter	promoter-TSS (NM_012478)	-32	NM_012478	23558	Hs.514489	NM_012478	ENSG00000132471	WBP2	DFNB107|GRAMD6|WBP-2	WW domain binding protein 2	protein-coding	90.32
chr1-30	chr1	15603551	15603820	Intergenic	CpG	-13773	NM_032341	84301	Hs.718857	NM_032341	ENSG00000197312	DDI2	-	DNA damage inducible 1 homolog 2	protein-coding	89.78
chr11-11	chr11	62771113	62771382	Promoter	promoter-TSS (NM_006473)	-56	NM_006473	10629	Hs.714400	NM_006473	ENSG00000162227	TAF6L	PAF65A	TATA-box binding protein associated factor 6 like	protein-coding	89.59
chr1-33	chr1	38859765	38860034	Promoter	promoter-TSS (NM_001271851)	-76	NM_022157	64121	Hs.532461	NM_022157	ENSG00000116954	RRAGC	GTR2|RAGC|TIB929	Ras related GTP binding C	protein-coding	88.14
chr17-12	chr17	18315116	18315385	Promoter	promoter-TSS (NM_144775)	-30	NM_144775	140775	Hs.592944	NM_144775	ENSG00000176994	SMCR8	-	Smith-Magenis syndrome chromosome region, candidate 8	protein-coding	86.43
chr15-4	chr15	73633433	73633702	Promoter	promoter-TSS (NM_017455)	-155	NM_001161364	27020	Hs.744867	NM_012428	ENSG00000156642	NPTN	GP55|GP65|SDFR1|SDR1|np55|np65	neuroplastin	protein-coding	85.92
chr9-5	chr9	92325364	92325633	Promoter	promoter-TSS (NR_046106)	30	NM_001012267	401541	Hs.713775	NM_001012267	ENSG00000188312	CENPP	CENP-P	centromere protein P	protein-coding	85.73
chr19-20	chr19	6536148	6536417	Genebody	TTS (NM_003811)	5283	NM_003811	8744	Hs.1524	NM_003811	ENSG00000125657	TNFSF9	4-1BB-L|CD137L|TNLG5A	TNF superfamily member 9	protein-coding	84.52
chr9-10	chr9	1930431	1930700	Intergenic	THE1B|LTR|ERVL-MaLR	-84654	NM_001289397	6595	Hs.298990	NM_003070	ENSG00000080503	SMARCA2	BAF190|BRM|NCBRS|SNF2|SNF2L2|SNF2LA|SWI2|Sth1p|hBRM|hSNF2a	SWI/SNF related, matrix associated, actin dependent regulator of chromatin, subfamily a, member 2	protein-coding	84.47
chr16-24	chr16	88856981	88857250	Promoter	promoter-TSS (NM_016209)	29	NM_001318532	51693	Hs.461722	NM_016209	ENSG00000167515	TRAPPC2L	HSPC176	trafficking protein particle complex 2 like	protein-coding	82.56
chr5-10	chr5	172115018	172115283	Genebody	intron (NM_005990, intron 4 of 18)	73192	NM_005990	6793	Hs.744005	NM_005990	ENSG00000072786	STK10	LOK|PRO2729	serine/threonine kinase 10	protein-coding	82.04
chr6-6	chr6	31862825	31863086	Promoter	promoter-TSS (NM_000434)	-23	NM_000434	4758	Hs.520037	NM_000434	ENSG00000204386	NEU1	NANH|NEU|SIAL1	neuraminidase 1	protein-coding	81.97
chr14-7	chr14	35122156	35122425	Promoter	promoter-TSS (NM_001256679)	-31	NM_001256678	9692	Hs.458487	NM_014672	ENSG00000100890	KIAA0391	MRPP3|PRORP	KIAA0391	protein-coding	81.65
chr9-12	chr9	6681129	6681398	Intergenic	CpG	-35571	NM_000170	2731	Hs.584238	NM_000170	ENSG00000178445	GLDC	GCE|GCSP|HYGN1	glycine decarboxylase	protein-coding	81.57
chr1-41	chr1	77682744	77683013	Promoter	promoter-TSS (NM_015534)	-220	NM_015534	26009	Hs.480506	NM_015534	ENSG00000036549	ZZZ3	ATAC1	zinc finger ZZ-type containing 3	protein-coding	81.2
chr9-7	chr9	6716278	6716547	Intergenic	CpG	-4451	NM_001146696	23081	Hs.709425	NM_015061	ENSG00000107077	KDM4C	GASC1|JHDM3C|JMJD2C|TDRD14C	lysine demethylase 4C	protein-coding	80.82
chr19-11	chr19	2783432	2783701	Promoter	promoter-TSS (NM_003021)	-210	NM_003021	6449	Hs.203910	NM_003021	ENSG00000104969	SGTA	SGT|alphaSGT|hSGT	small glutamine rich tetratricopeptide repeat containing alpha	protein-coding	80.44
chr1-35	chr1	209673377	209673646	Promoter	intron (NR_134510, intron 1 of 2)	1738	NR_134511	101930114	Hs.663934	NR_134509	ENSG00000227591	LOC101930114	-	uncharacterized LOC101930114	ncRNA	79.91
chr8-4	chr8	125091686	125091955	Promoter	promoter-TSS (NR_146191)	-1	NM_014846	9897	Hs.270043	NM_014846	ENSG00000164961	WASHC5	KIAA0196|RTSC|RTSC1|SPG8	WASH complex subunit 5	protein-coding	79.83
chr17-21	chr17	8192186	8192455	Intergenic	MLT1K|LTR|ERVL-MaLR	-2074	NM_017622	54785	Hs.129563	NM_017622	ENSG00000196544	BORCS6	C17orf59|PRO2472	BLOC-1 related complex subunit 6	protein-coding	79.21
chr1-45	chr1	154220592	154220801	Promoter	promoter-TSS (NM_014847)	101	NM_001297720	25912	Hs.287471	NM_015449	ENSG00000143612	C1orf43	HSPC012|NICE-3|NICE3|NS5ATP4|S863-3	chromosome 1 open reading frame 43	protein-coding	78.43
chr15-6	chr15	75758409	75758678	Intergenic	Intergenic	3772	NR_036198	100423035		NR_036198	ENSG00000284385	MIR4313	-	microRNA 4313	ncRNA	78.3
chr15-5	chr15	43791934	43792196	Promoter	promoter-TSS (NR_037673)	89	NR_037673	100529067	Hs.730672	NR_037673		SERF2-C15ORF63	-	SERF2-C15orf63 readthrough	ncRNA	77.69
chr19-21	chr19	15125560	15125823	Promoter	5' UTR (NM_006844, exon 1 of 16)	108	NM_006844	10994	Hs.78880	NM_006844	ENSG00000105135	ILVBL	209L8|AHAS|HACL1L|ILV2H	ilvB acetolactate synthase like	protein-coding	77.48
chr17-22	chr17	44344959	44345227	Promoter	promoter-TSS (NM_002087)	7	NM_002087	2896	Hs.514220	NM_002087	ENSG00000030582	GRN	CLN11|GEP|GP88|PCDGF|PEPI|PGRN	granulin precursor	protein-coding	75.65
chr16-29	chr16	21952485	21952754	Promoter	promoter-TSS (NM_003366)	-445	NM_003366	7385	Hs.528803	NM_003366	ENSG00000140740	UQCRC2	MC3DN5|QCR2|UQCR2	ubiquinol-cytochrome c reductase core protein 2	protein-coding	75.53
chr2-4	chr2	219178030	219178299	Promoter	promoter-TSS (NM_001321389)	10	NM_001321390	27013	Hs.4973	NM_015680	ENSG00000115649	CNPPD1	C2orf24|CGI-57	cyclin Pas1/PHO80 domain containing 1	protein-coding	74.49
chr3-9	chr3	158801909	158802178	Promoter	exon (NM_001167903, exon 1 of 15)	117	NM_001289406	64747	Hs.58663	NM_022736	ENSG00000118855	MFSD1	SMAP4	major facilitator superfamily domain containing 1	protein-coding	73.76
chrX-8	chrX	63198801	63199070	Intergenic	MER4-int|LTR|ERV1	152404	NM_001012968	139886	Hs.612782	NM_001012968	ENSG00000186767	SPIN4	TDRD28	spindlin family member 4	protein-coding	73.17
chr20-4	chr20	38962047	38962316	Promoter	promoter-TSS (NM_021931)	-157	NM_021931	60625	Hs.444520	NM_021931	ENSG00000101452	DHX35	C20orf15|DDX35|KAIA0875	DEAH-box helicase 35	protein-coding	72.96
chrX-6	chrX	63179879	63180148	Intergenic	MER4-int|LTR|ERV1	171326	NM_001012968	139886	Hs.612782	NM_001012968	ENSG00000186767	SPIN4	TDRD28	spindlin family member 4	protein-coding	72.69
chr10-8	chr10	45594763	45595031	Promoter	promoter-TSS (NM_145021)	9	NM_145021	220972	Hs.499489	NM_145021	ENSG00000165406	MARCH8	CMIR|MARCH-VIII|MIR|RNF178|c-MIR	membrane associated ring-CH-type finger 8	protein-coding	72.58
chr9-14	chr9	123326736	123327003	Intergenic	Intergenic	-29298	NM_173689	286204	Hs.568340	NM_173689	ENSG00000148204	CRB2	FSGS9|VMCKD	crumbs 2, cell polarity complex component	protein-coding	72.26
chr14-8	chr14	44962049	44962318	Promoter	promoter-TSS (NM_017658)	-7	NM_015091	23116	Hs.371078	NM_015091	ENSG00000198718	TOGARAM1	FAM179B|KIAA0423	TOG array regulator of axonemal microtubules 1	protein-coding	72.15
chr16-30	chr16	69762128	69762385	Promoter	promoter-TSS (NM_007014)	-28	NM_007014	11060	Hs.408458	NM_007014	ENSG00000198373	WWP2	AIP2|WWp2-like	WW domain containing E3 ubiquitin protein ligase 2	protein-coding	71.34
chr7-5	chr7	26864718	26864987	Promoter	promoter-TSS (NM_003930)	-109	NM_003930	8935	Hs.200770	NM_003930	ENSG00000005020	SKAP2	PRAP|RA70|SAPS|SCAP2|SKAP-HOM|SKAP55R	src kinase associated phosphoprotein 2	protein-coding	71.08
chr7-6	chr7	99472554	99472823	Promoter	promoter-TSS (NM_213603)	-204	NR_147002	285989	Hs.440384	NM_213603	ENSG00000198556	ZNF789	-	zinc finger protein 789	protein-coding	69.95
chrX-5	chrX	102659792	102660061	Promoter	promoter-TSS (NR_146585)	-11	NR_146585	100528062	Hs.522729	NM_001199818		ARMCX5-GPRASP2	ARMCX5-GPRASP2-BHLHB9-LINC00630|bHLHb9|p60TRP	ARMCX5-GPRASP2 readthrough	protein-coding	69.82
chr1-60	chr1	220272442	220272711	Promoter	promoter-TSS (NM_012414)	-75	NM_012414	25782	Hs.654849	NM_012414	ENSG00000118873	RAB3GAP2	RAB3-GAP150|RAB3GAP150|SPG69|WARBM2|p150	RAB3 GTPase activating non-catalytic protein subunit 2	protein-coding	68.5
chr5-9	chr5	132963542	132963811	Promoter	promoter-TSS (NM_014423)	-14	NM_014423	27125	Hs.519313	NM_014423	ENSG00000072364	AFF4	AF5Q31|CHOPS|MCEF	AF4/FMR2 family member 4	protein-coding	68.05
chr17-32	chr17	60392056	60392325	Promoter	promoter-TSS (NM_032582)	35	NM_032582	84669	Hs.132868	NM_032582	ENSG00000170832	USP32	NY-REN-60|USP10	ubiquitin specific peptidase 32	protein-coding	67.83
chr20-6	chr20	34338047	34338316	Intergenic	AluSz|SINE|Alu	-25054	NM_031483	83737	Hs.632272	NM_031483	ENSG00000078747	ITCH	ADMFD|AIF4|AIP4|NAPP1	itchy E3 ubiquitin protein ligase	protein-coding	67.73
chr9-11	chr9	72210507	72210776	Genebody	intron (NR_147240, intron 3 of 15)	61290	NM_001351572	9615	Hs.494163	NM_004293	ENSG00000119125	GDA	CYPIN|GAH|GUANASE|NEDASIN	guanine deaminase	protein-coding	67.46
chr5-11	chr5	66144541	66144806	Promoter	promoter-TSS (NM_139168)	-162	NM_139168	140890	Hs.49367	NM_139168	ENSG00000153914	SREK1	SFRS12|SRrp508|SRrp86	splicing regulatory glutamic acid and lysine rich protein 1	protein-coding	67.39
chr19-12	chr19	45178477	45178737	Promoter	promoter-TSS (NM_001270893)	-138	NM_212550	388552	Hs.103902	NM_212550	ENSG00000189114	BLOC1S3	BLOS3|HPS8|RP	biogenesis of lysosomal organelles complex 1 subunit 3	protein-coding	66.21
chr6-10	chr6	167114171	167114440	Genebody	intron (NM_004367, intron 1 of 2)	2498	NM_004367	1235	Hs.46468	NM_004367	ENSG00000112486	CCR6	BN-1|C-C CKR-6|CC-CKR-6|CCR-6|CD196|CKR-L3|CKRL3|CMKBR6|DCR2|DRY6|GPR29|GPRCY4|STRL22	C-C motif chemokine receptor 6	protein-coding	65.82
chr19-19	chr19	50896696	50896964	Promoter	promoter-TSS (NR_002948)	-432	NR_002948	606293	Hs.643424	NR_002948	ENSG00000197588	KLKP1	KARMA|KLK31P|KRSP1|PsiKLK1|YKLK1	kallikrein pseudogene 1	pseudo	65.55
chr9-13	chr9	128947483	128947752	Promoter	promoter-TSS (NM_015354)	-76	NM_015354	23511	Hs.308340	NM_015354	ENSG00000095319	NUP188	KIAA0169|hNup188	nucleoporin 188	protein-coding	65.39
chr12-10	chr12	123365069	123365334	Promoter	promoter-TSS (NM_001167856)	8	NM_018183	55206	Hs.7012	NM_018183	ENSG00000139697	SBNO1	MOP3|Sno	strawberry notch homolog 1	protein-coding	65.18
chr14-11	chr14	24095488	24095757	Promoter	promoter-TSS (NM_001354769)	-492	NM_001354769	4901	Hs.652297	NM_006177	ENSG00000129535	NRL	D14S46E|NRL-MAF|RP27	neural retina leucine zipper	protein-coding	64.8
chr11-14	chr11	61792709	61792953	Promoter	promoter-TSS (NR_030342)	194	NM_004111	2237	Hs.409065	NM_004111	ENSG00000168496	FEN1	FEN-1|MF1|RAD2	flap structure-specific endonuclease 1	protein-coding	63.99
chr3-15	chr3	57693059	57693325	Promoter	promoter-TSS (NR_135550)	-13	NR_135550	101929159	Hs.434396	NR_135550	ENSG00000241933	DENND6A-DT	-	DENND6A divergent transcript	ncRNA	63.52
chr19-18	chr19	11377185	11377452	Genebody	TTS (NM_175871)	2611	NM_175871	126074	Hs.631619	NM_175871	ENSG00000173928	SWSAP1	C19orf39|SWS1AP1|ZSWIM7AP1	SWIM-type zinc finger 7 associated protein 1	protein-coding	63.15
chr9-9	chr9	34049179	34049432	Promoter	promoter-TSS (NM_018449)	-356	NM_001282529	55833	Hs.493739	NM_018449	ENSG00000137073	UBAP2	UBAP-2	ubiquitin associated protein 2	protein-coding	63.02
chr16-39	chr16	10093637	10093906	Genebody	MLT1H|LTR|ERVL-MaLR	88296	NM_001134408	2903	Hs.411472	NM_000833	ENSG00000183454	GRIN2A	EPND|FESD|GluN2A|LKS|NMDAR2A|NR2A	glutamate ionotropic receptor NMDA type subunit 2A	protein-coding	62.31
chr4-15	chr4	89057084	89057353	Promoter	promoter-TSS (NM_014883)	-23	NM_014883	10144	Hs.97270	NM_014883	ENSG00000138640	FAM13A	ARHGAP48|FAM13A1	family with sequence similarity 13 member A	protein-coding	62.17
chr22-6	chr22	46561550	46561819	Intergenic	Intergenic	-24514	NM_014246	9620	Hs.252387	NM_014246	ENSG00000075275	CELSR1	ADGRC1|CDHF9|FMI2|HFMI2|ME2	cadherin EGF LAG seven-pass G-type receptor 1	protein-coding	61.42
chr2-5	chr2	157363613	157363882	Intergenic	Intergenic	16762	NR_034169	728066	Hs.470311	NR_034169		FAM133DP	-	family with sequence similarity 133, member A pseudogene	pseudo	60.88
chr2-8	chr2	27582813	27583073	Promoter	promoter-TSS (NM_032434)	-26	NM_001271318	84450	Hs.529178	NM_032434	ENSG00000243943	ZNF512	-	zinc finger protein 512	protein-coding	60.66
chr11-12	chr11	44556890	44557159	Intergenic	MIRc|SINE|MIR	-8567	NM_002231	3732	Hs.527778	NM_002231	ENSG00000085117	CD82	4F9|C33|GR15|IA4|KAI1|R2|SAR2|ST6|TSPAN27	CD82 molecule	protein-coding	60.05
chr16-32	chr16	27375104	27375373	Intergenic	MLT1K|LTR|ERVL-MaLR	-26924	NM_181078	50615	Hs.210546	NM_021798	ENSG00000103522	IL21R	CD360|IMD56|NILR	interleukin 21 receptor	protein-coding	59.57
chr21-4	chr21	42532810	42533079	Genebody	intron (NM_001320537, intron 3 of 19)	19091	NM_001320537	54020	Hs.547009	NM_018964	ENSG00000160190	SLC37A1	G3PP	solute carrier family 37 member 1	protein-coding	59.57
chr5-13	chr5	69234631	69234900	Promoter	promoter-TSS (NM_001324078)	-30	NM_001324071	1022	Hs.184298	NM_001799	ENSG00000134058	CDK7	CAK|CAK1|CDKN7|HCAK|MO15|STK1|p39MO15	cyclin dependent kinase 7	protein-coding	59.14
chr1-68	chr1	11735916	11736185	Promoter	promoter-TSS (NM_020350)	-35	NM_001040197	57085	Hs.464438	NM_020350	ENSG00000177674	AGTRAP	ATRAP	angiotensin II receptor associated protein	protein-coding	59.11
chr4-9	chr4	98929143	98929403	Promoter	promoter-TSS (NM_001130678)	-181	NM_001130678	1977	Hs.13211	NM_001968	ENSG00000151247	EIF4E	AUTS19|CBP|EIF4E1|EIF4EL1|EIF4F|eIF-4E	eukaryotic translation initiation factor 4E	protein-coding	59.05
chr19-17	chr19	5790703	5790972	Promoter	CpG	401	NM_020175	56931	Hs.284297	NM_020175	ENSG00000141994	DUS3L	DUS3	dihydrouridine synthase 3 like	protein-coding	58.68
chr17-27	chr17	82292741	82293010	Promoter	promoter-TSS (NR_135639)	-61	NR_135639	101929511	Hs.147682	NR_135639	ENSG00000265692	LINC01970	-	long intergenic non-protein coding RNA 1970	ncRNA	58.52
chr17-28	chr17	74873257	74873521	Promoter	promoter-TSS (NM_001258012)	-358	NM_024417	2232	Hs.69745	NM_004110	ENSG00000161513	FDXR	ADXR|ANOA	ferredoxin reductase	protein-coding	58.45
chr1-37	chr1	236097158	236097427	Intergenic	LTR10A|LTR|ERV1	-32111	NM_002508	4811	Hs.356624	NM_002508	ENSG00000116962	NID1	NID	nidogen 1	protein-coding	58.28
chr1-47	chr1	156295569	156295838	Promoter	promoter-TSS (NM_144580)	-14	NM_001256608	112770	Hs.202522	NM_144580	ENSG00000198715	GLMP	C1orf85|NCU-G1	glycosylated lysosomal membrane protein	protein-coding	57.77
chr1-70	chr1	27869111	27869380	Intergenic	Intergenic	-3298	NM_001105556	9473	Hs.10649	NM_004848	ENSG00000130775	THEMIS2	C1orf38|ICB-1|ICB1	thymocyte selection associated family member 2	protein-coding	57.61
chr7-8	chr7	100344892	100345161	Genebody	LTR13|LTR|ERVK	-7292	NR_103728	101752334	Hs.521075	NR_103728		PVRIG2P	-	poliovirus receptor related immunoglobulin domain containing 2, pseudogene	pseudo	57.34
chr14-10	chr14	92775281	92775550	Intergenic	Intergenic	-18816	NM_005113	9950	Hs.104320	NM_005113	ENSG00000066455	GOLGA5	GOLIM5|RFG5|ret-II	golgin A5	protein-coding	56.62
chr3-21	chr3	113746555	113746824	Promoter	promoter-TSS (NM_001308445)	-330	NM_001690	523	Hs.477155	NM_001690	ENSG00000114573	ATP6V1A	ARCL2D|ATP6A1|ATP6V1A1|HO68|VA68|VPP2|Vma1	ATPase H+ transporting V1 subunit A	protein-coding	56.48
chr17-24	chr17	17237528	17237797	Promoter	promoter-TSS (NM_001353229)	-471	NM_001353231	201163	Hs.31652	NM_144606	ENSG00000154803	FLCN	BHD|FLCL	folliculin	protein-coding	56.46
chr1-55	chr1	36224145	36224408	Promoter	promoter-TSS (NM_005119)	-136	NM_001321473	9967	Hs.744057	NM_005119	ENSG00000054118	THRAP3	BCLAF2|TRAP150	thyroid hormone receptor associated protein 3	protein-coding	56.45
chr21-3	chr21	37563753	37564022	Intergenic	CpG	143588	NM_130438	1859	Hs.368240	NM_001396	ENSG00000157540	DYRK1A	DYRK|DYRK1|HP86|MNB|MNBH|MRD7	dual specificity tyrosine phosphorylation regulated kinase 1A	protein-coding	56.4
chr4-8	chr4	113762604	113762873	Promoter	promoter-TSS (NM_001321587)	-811	NM_001321591	817	Hs.144114	NM_001221	ENSG00000145349	CAMK2D	CAMKD	calcium/calmodulin dependent protein kinase II delta	protein-coding	56.16
chr22-4	chr22	35299791	35300041	Promoter	non-coding (NR_024194, exon 1 of 15)	112	NR_024195	10043	Hs.474705	NM_005488	ENSG00000100284	TOM1	-	target of myb1 membrane trafficking protein	protein-coding	55.9
chr6-7	chr6	166951004	166951272	Genebody	LTR13|LTR|ERVK	5451	NM_003730	8635	Hs.529989	NM_003730	ENSG00000026297	RNASET2	RNASE6PL|bA514O12.3	ribonuclease T2	protein-coding	55.72
chrY-2	chrY	318846	319115	Promoter	promoter-TSS (NM_012227).2	-161	NM_012227	8225	Hs.437145	NM_012227	ENSG00000178605	GTPBP6	PGPL	GTP binding protein 6 (putative)	protein-coding	55.44
chr15-7	chr15	64989387	64989656	Promoter	promoter-TSS (NM_001127889)	-15	NM_001127889	51324	Hs.242458	NM_016630	ENSG00000090487	SPG21	ACP33|BM-019|GL010|MAST	SPG21, maspardin	protein-coding	55.38
chr7-7	chr7	108569673	108569942	Promoter	promoter-TSS (NM_001287601)	-39	NM_001287601	168451	Hs.707689	NM_182529	ENSG00000177683	THAP5	-	THAP domain containing 5	protein-coding	55.27
chr15-9	chr15	38254590	38254852	Promoter	intron (NM_152594, intron 1 of 6)	1870	NM_152594	161742	Hs.525781	NM_152594	ENSG00000166068	SPRED1	NFLS|PPP1R147|hSpred1|spred-1	sprouty related EVH1 domain containing 1	protein-coding	54.91
chr20-5	chr20	1897587	1897856	Genebody	intron (NM_001040023, intron 1 of 7)	2541	NM_001040023	140885	Hs.581021	NM_080792	ENSG00000198053	SIRPA	BIT|CD172A|MFR|MYD-1|P84|PTPNS1|SHPS1|SIRP	signal regulatory protein alpha	protein-coding	54.6
chr4-13	chr4	82373889	82374158	Promoter	promoter-TSS (NM_002138)	-27	NM_031369	3184	Hs.480073	NM_002138	ENSG00000138668	HNRNPD	AUF1|AUF1A|HNRPD|P37|hnRNPD0	heterogeneous nuclear ribonucleoprotein D	protein-coding	54.39
chr1-50	chr1	181022919	181023188	Promoter	promoter-TSS (NM_001286210)	68	NM_005819	10228	Hs.518417	NM_005819	ENSG00000135823	STX6	-	syntaxin 6	protein-coding	54.36
chr8-7	chr8	101203835	101204092	Promoter	intron (NM_001042510, intron 1 of 4)	1769	NM_016096	51123	Hs.374485	NM_016096	ENSG00000120963	ZNF706	HSPC038|PNAS-106|PNAS-113	zinc finger protein 706	protein-coding	54.12
chrX-7	chrX	318845	319114	Promoter	promoter-TSS (NM_012227)	-160	NM_012227	8225	Hs.437145	NM_012227	ENSG00000178605	GTPBP6	PGPL	GTP binding protein 6 (putative)	protein-coding	53.99
chr8-5	chr8	103020975	103021239	Promoter	promoter-TSS (NM_001695)	87	NM_001695	528	Hs.86905	NM_001695	ENSG00000155097	ATP6V1C1	ATP6C|ATP6D|VATC|Vma5	ATPase H+ transporting V1 subunit C1	protein-coding	53.86
chr1-64	chr1	155262248	155262517	Promoter	promoter-TSS (NM_052837)	3	NM_005698	10067	Hs.200600	NM_005698	ENSG00000116521	SCAMP3	C1orf3	secretory carrier membrane protein 3	protein-coding	53.45
chr20-7	chr20	48921496	48921763	Promoter	promoter-TSS (NM_006420)	-109	NM_006420	10564	Hs.62578	NM_006420	ENSG00000124198	ARFGEF2	BIG2|PVNH2|dJ1164I10.1	ADP ribosylation factor guanine nucleotide exchange factor 2	protein-coding	52.74
chr1-59	chr1	22451659	22451928	Promoter	promoter-TSS (NM_014870)	-58	NM_001083621	9923	Hs.418966	NM_014870	ENSG00000184677	ZBTB40	ZNF923	zinc finger and BTB domain containing 40	protein-coding	52.7
chr16-35	chr16	1474933	1475202	Promoter	promoter-TSS (NM_001287)	17	NM_001114331	1186	Hs.459649	NM_001287	ENSG00000103249	CLCN7	CLC-7|CLC7|OPTA2|OPTB4|PPP1R63	chloride voltage-gated channel 7	protein-coding	52.67
chr17-26	chr17	44070539	44070808	Promoter	promoter-TSS (NM_138387)	-57	NM_001319945	92579	Hs.294005	NM_138387	ENSG00000141349	G6PC3	SCN4|UGRP	glucose-6-phosphatase catalytic subunit 3	protein-coding	52.59
chr12-11	chr12	120904308	120904577	Promoter	promoter-TSS (NR_131215)	-90	NM_139015	121665	Hs.507087	NM_139015	ENSG00000157837	SPPL3	IMP2|MDHV1887|PRO4332|PSH1|PSL4	signal peptide peptidase like 3	protein-coding	52.51
chr15-8	chr15	41283616	41283885	Promoter	promoter-TSS (NR_026757)	-240	NR_152822	729082	Hs.380164	NR_026757	ENSG00000247556	OIP5-AS1	cyrano|linc-OIP5	OIP5 antisense RNA 1	ncRNA	52.32
chr12-12	chr12	103965661	103965930	Promoter	promoter-TSS (NM_003211)	-20	NM_003211	6996	Hs.584809	NM_003211	ENSG00000139372	TDG	hTDG	thymine DNA glycosylase	protein-coding	52.22
chr14-9	chr14	81221153	81221422	Promoter	promoter-TSS (NR_135252)	-56	NM_201595	2957	Hs.592334	NM_015859	ENSG00000165417	GTF2A1	TF2A1|TFIIA|TFIIA-42|TFIIAL	general transcription factor IIA subunit 1	protein-coding	52.06
chr10-9	chr10	49188287	49188556	Promoter	promoter-TSS (NM_001353330)	-7	NM_001288742	170371	Hs.385493	NM_001010863	ENSG00000204161	TMEM273	C10orf128	transmembrane protein 273	protein-coding	51.68
chr13-4	chr13	97433048	97433317	Promoter	CpG	-1039	NM_021033	5911	Hs.508480	NM_021033	ENSG00000125249	RAP2A	K-REV|KREV|RAP2|RbBP-30	RAP2A, member of RAS oncogene family	protein-coding	51.17
chr16-33	chr16	22218026	22218295	Genebody	MLT1K|LTR|ERVL-MaLR	11889	NM_013302	29904	Hs.498892	NM_013302	ENSG00000103319	EEF2K	HSU93850|eEF-2K	eukaryotic elongation factor 2 kinase	protein-coding	51.14
chr18-2	chr18	9136668	9136937	Promoter	promoter-TSS (NM_015208)	49	NM_015208	23253	Hs.464585	NM_015208	ENSG00000101745	ANKRD12	ANCO-2|ANCO1|GAC-1|Nbla00144	ankyrin repeat domain 12	protein-coding	51.12
chr16-42	chr16	5071672	5071941	Promoter	promoter-TSS (NM_001330504)	-3	NM_019109	56052	Hs.592086	NM_019109	ENSG00000033011	ALG1	CDG1K|HMAT1|HMT-1|HMT1|MT-1|Mat-1|hMat-1	ALG1, chitobiosyldiphosphodolichol beta-mannosyltransferase	protein-coding	50.98
chr6-9	chr6	109382737	109383006	Promoter	promoter-TSS (NM_001142403)	-59	NM_001142402	8763	Hs.520313	NM_006016	ENSG00000135535	CD164	DFNA66|MGC-24|MGC-24v|MUC-24|endolyn	CD164 molecule	protein-coding	50.95
chr1-52	chr1	26431998	26432267	Promoter	promoter-TSS (NM_024887)	-150	NM_024887	79947	Hs.369385	NM_024887	ENSG00000117682	DHDDS	CIT|CPT|DEDSM|DS|HDS|RP59	dehydrodolichyl diphosphate synthase subunit	protein-coding	50.93
chr3-12	chr3	132417298	132417565	Promoter	promoter-TSS (NM_015268)	-229	NM_001329126	23317	Hs.12707	NM_015268	ENSG00000138246	DNAJC13	PARK21|RME8	DnaJ heat shock protein family (Hsp40) member C13	protein-coding	50.85
chr2-12	chr2	240586525	240586791	Promoter	promoter-TSS (NR_103792)	-58	NM_023085	11132	Hs.728234	NM_021251	ENSG00000142330	CAPN10	CANP10|NIDDM1	calpain 10	protein-coding	50.66
chr19-29	chr19	19489279	19489544	Genebody	intron (NM_017660, intron 2 of 11)	26249	NM_032037	83983	Hs.532711	NM_032037	ENSG00000178093	TSSK6	CT72|FKSG82|SSTK|TSSK4	testis specific serine kinase 6	protein-coding	50.28
chr6-18	chr6	137867102	137867371	Promoter	promoter-TSS (NM_006290)	48	NM_001270507	7128	Hs.211600	NM_006290	ENSG00000118503	TNFAIP3	A20|AISBL|OTUD7C|TNFA1P2	TNF alpha induced protein 3	protein-coding	50.23
chr1-90	chr1	10032842	10033108	Promoter	promoter-TSS (NM_006048)	-8	NM_001105562	10277	Hs.593974	NM_006048	ENSG00000130939	UBE4B	E4|HDNB1|UBOX3|UFD2|UFD2A	ubiquitination factor E4B	protein-coding	50.09
chr17-36	chr17	44899538	44899794	Promoter	promoter-TSS (NM_001258399)	-41	NM_001258354	9343	Hs.151787	NM_004247	ENSG00000108883	EFTUD2	MFDGA|MFDM|SNRNP116|Snrp116|Snu114|U5-116KD	elongation factor Tu GTP binding domain containing 2	protein-coding	49.93
chr3-16	chr3	156555192	156555461	Promoter	promoter-TSS (NM_001308197)	-126	NM_001308197	6747	Hs.518346	NM_007107	ENSG00000114850	SSR3	TRAPG	signal sequence receptor subunit 3	protein-coding	49.91
chr14-17	chr14	105064736	105065005	Promoter	intron (NM_001278694, intron 1 of 4)	680	NM_013345	29933	Hs.532504	NM_013345	ENSG00000183484	GPR132	G2A	G protein-coupled receptor 132	protein-coding	49.53
chr19-27	chr19	10315872	10316139	Promoter	promoter-TSS (NM_001031734)	10	NM_001031734	112812	Hs.654865	NM_080665	ENSG00000267673	FDX2	FDX1L	ferredoxin 2	protein-coding	49.39
chr12-15	chr12	54032796	54033065	Promoter	promoter-TSS (NM_018953)	-118	NM_018953	3222	Hs.549040	NM_018953	ENSG00000172789	HOXC5	CP11|HOX3|HOX3D	homeobox C5	protein-coding	49.08
chr7-10	chr7	131108023	131108292	Promoter	non-coding (NR_015431, exon 2 of 5)	-1127	NR_024153	378805	Hs.150556	NM_001085379	ENSG00000231721	LINC-PINT	LincRNA-Pint|MKLN1-AS1|PINT	long intergenic non-protein coding RNA, p53 induced transcript	ncRNA	48.89
chr11-13	chr11	17208376	17208645	Promoter	promoter-TSS (NM_002645)	-514	NM_002645	5286	Hs.175343	NM_002645	ENSG00000011405	PIK3C2A	CPK|PI3-K-C2(ALPHA)|PI3-K-C2A|PI3K-C2-alpha|PI3K-C2alpha	phosphatidylinositol-4-phosphate 3-kinase catalytic subunit type 2 alpha	protein-coding	48.84
chr15-19	chr15	75735185	75735454	Genebody	LTR13A|LTR|ERVK	4758	NR_024595	100128285	Hs.604066	NR_024595		DNM1P35	DNM1DN8-2|DNM1DN8.2|DNM1DN8@|FKSG88	dynamin 1 pseudogene 35	pseudo	48.81
chr3-11	chr3	197959891	197960160	Promoter	promoter-TSS (NM_001136049)	-6	NM_032263	84223	Hs.591675	NM_032263	ENSG00000114473	IQCG	CFAP122|DRC9	IQ motif containing G	protein-coding	48.49
chr3-17	chr3	156978709	156978975	Genebody	Charlie13a|DNA|hAT-Charlie	-102999	NR_135546	105374177	Hs.634263	NR_135546	ENSG00000241544	LINC02029	-	long intergenic non-protein coding RNA 2029	ncRNA	48.46
chr20-13	chr20	41692724	41692984	Intergenic	CpG	-74360	NM_032221	84181	Hs.740645	NM_032221	ENSG00000124177	CHD6	CHD-6|CHD5|RIGB	chromodomain helicase DNA binding protein 6	protein-coding	48.44
chr14-16	chr14	106539947	106540216	Intergenic	LTR13_|LTR|ERVK	57642	NR_027457	338005	Hs.322826	NR_027457	ENSG00000270816	LINC00221	C14orf98|NCRNA00221	long intergenic non-protein coding RNA 221	ncRNA	47.98
chr3-19	chr3	143001325	143001588	Promoter	promoter-TSS (NM_001320219)	11	NR_034032	100289361	Hs.599649	NR_034032	ENSG00000268129	LOC100289361	-	uncharacterized LOC100289361	ncRNA	47.92
chr13-5	chr13	42271720	42271986	Promoter	promoter-TSS (NM_016248)	-300	NM_016248	11215	Hs.105105	NM_016248	ENSG00000023516	AKAP11	AKAP-11|AKAP220|PPP1R44|PRKA11	A-kinase anchoring protein 11	protein-coding	47.87
chr1-57	chr1	155218910	155219177	Genebody	intron (NR_002188, intron 1 of 12)	8491	NR_002188	2630	Hs.719930	NR_002188	ENSG00000160766	GBAP1	GBAP	glucosylceramidase beta pseudogene 1	pseudo	47.85
chr22-7	chr22	39520285	39520549	Promoter	promoter-TSS (NM_001675)	-142	NM_001675	468	Hs.496487	NM_001675	ENSG00000128272	ATF4	CREB-2|CREB2|TAXREB67|TXREB	activating transcription factor 4	protein-coding	47.74
chr8-9	chr8	55919815	55920084	Genebody	intron (NM_001111097, intron 1 of 12)	-17094	NR_145767	109617001		NR_145767	ENSG00000199405	SNORA1B	-	small nucleolar RNA, H/ACA box 1B	snoRNA	47.49
chr3-18	chr3	45842033	45842302	Promoter	promoter-TSS (NR_075080)	-9	NM_020347	54585	Hs.30824	NM_020347	ENSG00000163818	LZTFL1	BBS17	leucine zipper transcription factor like 1	protein-coding	47.41
chr7-9	chr7	93232226	93232495	Promoter	promoter-TSS (NM_017667)	20	NM_017667	55610	Hs.202424	NM_017667	ENSG00000004766	VPS50	CCDC132|VPS54L	VPS50, EARP/GARPII complex subunit	protein-coding	47.14
chr14-15	chr14	21384085	21384347	Promoter	promoter-TSS (NM_007192)	50	NM_007192	11198	Hs.213724	NM_007192	ENSG00000092201	SUPT16H	CDC68|FACTP140|SPT16|SPT16/CDC68	SPT16 homolog, facilitates chromatin remodeling subunit	protein-coding	47
chr2-10	chr2	8680344	8680613	Promoter	non-coding (NR_110153, exon 2 of 2)	1383	NR_110153	100506299	Hs.439031	NR_110153	ENSG00000235092	ID2-AS1	-	ID2 antisense RNA 1	ncRNA	46.98
chr19-22	chr19	49877403	49877672	Promoter	promoter-TSS (NM_032375)	112	NM_001168222	79735	Hs.631587	NM_024682	ENSG00000104946	TBC1D17	-	TBC1 domain family member 17	protein-coding	46.9
chr13-10	chr13	27131194	27131462	Genebody	MIRc|SINE|MIR	5795	NR_046547	100874070	Hs.524923	NR_046547		USP12-AS1	-	USP12 antisense RNA 1	ncRNA	46.84
chr14-12	chr14	63746101	63746370	Intergenic	LTR8B|LTR|ERV1	-18140	NM_030791	81537	Hs.24678	NM_030791	ENSG00000126821	SGPP1	SPPase1	sphingosine-1-phosphate phosphatase 1	protein-coding	46.69
chr20-11	chr20	33592000	33592266	Genebody	AluSp|SINE|Alu	29768	NM_001039709	9139	Hs.153934	NM_005093	ENSG00000078699	CBFA2T2	EHT|MTGR1|ZMYND3|p85	CBFA2/RUNX1 translocation partner 2	protein-coding	46.65
chr5-12	chr5	78758485	78758748	Intergenic	MARNA|DNA|TcMar-Mariner	-109791	NM_005779	10184	Hs.79299	NM_005779	ENSG00000145685	LHFPL2	-	LHFPL tetraspan subfamily member 2	protein-coding	46.44
chr3-13	chr3	167750327	167750592	Genebody	intron (NM_005025, intron 1 of 8)	14736	NM_005025	5274	Hs.478153	NM_005025	ENSG00000163536	SERPINI1	PI12|neuroserpin	serpin family I member 1	protein-coding	46.19
chr1-112	chr1	178418637	178418906	Genebody	MLT1I|LTR|ERVL-MaLR	77300	NM_004841	9462	Hs.496139	NM_004841	ENSG00000075391	RASAL2	NGAP	RAS protein activator like 2	protein-coding	45.62
chr6-8	chr6	15901426	15901692	Intergenic	MER50|LTR|ERV1	-227527	NM_013262	29116	Hs.484738	NM_013262	ENSG00000007944	MYLIP	IDOL|MIR	myosin regulatory light chain interacting protein	protein-coding	45.15
chr12-14	chr12	6724124	6724393	Promoter	promoter-TSS (NM_001164093)	-25	NM_001164093	50813	Hs.530823	NM_016319	ENSG00000111652	COPS7A	CSN7|CSN7A|SGN7a	COP9 signalosome subunit 7A	protein-coding	45.05
chr1-76	chr1	183635945	183636209	Promoter	promoter-TSS (NM_001270439)	30	NM_015149	23179	Hs.497148	NM_015149	ENSG00000143344	RGL1	RGL	ral guanine nucleotide dissociation stimulator like 1	protein-coding	45.03
chr19-23	chr19	32345502	32345769	Promoter	promoter-TSS (NM_001136156)	27	NM_001136156	22847	Hs.205392	NM_014910	ENSG00000168813	ZNF507	-	zinc finger protein 507	protein-coding	44.93
chr16-36	chr16	29821158	29821422	Promoter	3' UTR (NM_024516, exon 3 of 3)	896	NM_005115	9961	Hs.632177	NM_005115	ENSG00000013364	MVP	LRP|VAULT1	major vault protein	protein-coding	44.87
chr9-16	chr9	129036360	129036629	Promoter	promoter-TSS (NM_001329990)	-17	NR_138423	84895	Hs.632693	NM_032809	ENSG00000148343	MIGA2	C9orf54|FAM73B	mitoguardin 2	protein-coding	44.73
chr4-11	chr4	72112601	72112870	Genebody	intron (NM_001144756, intron 2 of 4)	73603	NM_001144756	10886	Hs.99231	NM_004885	ENSG00000056291	NPFFR2	GPR74|HLWAR77|NPFF2|NPGPR	neuropeptide FF receptor 2	protein-coding	44.68
chr5-18	chr5	32585352	32585610	Promoter	promoter-TSS (NM_006713)	-18	NM_006713	10923	Hs.229641	NM_006713	ENSG00000113387	SUB1	P15|PC4|p14	SUB1 homolog, transcriptional regulator	protein-coding	44.34
chr8-6	chr8	63169971	63170240	Promoter	intron (NM_001277816, intron 2 of 3)	1102	NM_001277818	253943	Hs.491861	NM_152758	ENSG00000185728	YTHDF3	-	YTH N6-methyladenosine RNA binding protein 3	protein-coding	44.11
chr19-25	chr19	8240388	8240656	Genebody	intron (NM_024552, intron 2 of 11)	31189	NM_024552	79603	Hs.515111	NM_024552	ENSG00000090661	CERS4	LASS4|Trh1	ceramide synthase 4	protein-coding	43.87
chr14-14	chr14	75176571	75176832	Promoter	promoter-TSS (NM_006827)	-55	NM_006827	10972	Hs.74137	NM_006827	ENSG00000170348	TMED10	P24(DELTA)|S31I125|S31III125|TMP21|Tmp-21-I|p23|p24d1	transmembrane p24 trafficking protein 10	protein-coding	43.47
chr17-25	chr17	16438530	16438785	Promoter	promoter-TSS (NR_027172)	-330	NR_027178	125144	Hs.368934	NM_152350	ENSG00000175061	LRRC75A-AS1	C17orf45|C17orf76-AS1|FAM211A-AS1|NCRNA00188|TSAP19	LRRC75A antisense RNA 1	ncRNA	43.28
chr1-66	chr1	2555627	2555896	Promoter	promoter-TSS (NM_001297605).2	-604	NM_001297605	8764	Hs.512898	NM_003820	ENSG00000157873	TNFRSF14	ATAR|CD270|HVEA|HVEM|LIGHTR|TR2	TNF receptor superfamily member 14	protein-coding	42.99
chr17-31	chr17	18856186	18856441	Promoter	promoter-TSS (NM_001243936)	14	NM_001353102	5636	Hs.632236	NM_002767	ENSG00000141127	PRPSAP2	PAP41	phosphoribosyl pyrophosphate synthetase associated protein 2	protein-coding	42.97
chr9-17	chr9	32552089	32552350	Promoter	promoter-TSS (NR_146061)	-15	NR_146063	100129250	Hs.664395	NM_001349118	ENSG00000235453	SMIM27	C9orf133|TOPORS-AS1	small integral membrane protein 27	protein-coding	42.89
chr5-16	chr5	173056167	173056436	Promoter	promoter-TSS (NM_001168393)	-51	NM_153607	153222	Hs.484195	NM_153607	ENSG00000164463	CREBRF	C5orf41|LRF	CREB3 regulatory factor	protein-coding	42.8
chr17-39	chr17	8859472	8859741	Genebody	MLT2B1|LTR|ERVL	8071	NM_001010855	146850	Hs.255809	NM_001010855	ENSG00000276231	PIK3R6	C17orf38|HsT41028|p84 PIKAP|p87(PIKAP)|p87PIKAP	phosphoinositide-3-kinase regulatory subunit 6	protein-coding	42.77
chr6-12	chr6	6392607	6392870	Genebody	MIRc|SINE|MIR	-72047	NM_000129	2162	Hs.335513	NM_000129	ENSG00000124491	F13A1	F13A	coagulation factor XIII A chain	protein-coding	42.62
chr3-20	chr3	49786573	49786842	Promoter	promoter-TSS (NM_001242829)	-167	NM_001006115	9807	Hs.386168	NM_153273	ENSG00000176095	IP6K1	IHPK1|PiUS	inositol hexakisphosphate kinase 1	protein-coding	42.58
chr10-17	chr10	32346369	32346634	Promoter	promoter-TSS (NR_104163)	547	NM_001272019	80314	Hs.167805	NM_025209	ENSG00000120616	EPC1	Epl1	enhancer of polycomb homolog 1	protein-coding	42.57
chr9-18	chr9	128322084	128322353	Promoter	promoter-TSS (NM_016035)	0	NM_001329862	26995	Hs.632685	NM_015679	ENSG00000167112	TRUB2	CLONE24922	TruB pseudouridine synthase family member 2	protein-coding	42.53
chr19-41	chr19	4402389	4402658	Promoter	promoter-TSS (NM_005483)	-140	NM_005483	10036	Hs.79018	NM_005483	ENSG00000167670	CHAF1A	CAF-1|CAF1|CAF1B|CAF1P150|P150	chromatin assembly factor 1 subunit A	protein-coding	42.48
chr4-14	chr4	83455743	83456012	Promoter	promoter-TSS (NM_001297767)	6	NM_001297759	113510	Hs.480101	NM_133636	ENSG00000163312	HELQ	HEL308	helicase, POLQ like	protein-coding	42.42
chr16-46	chr16	2520245	2520513	Promoter	promoter-TSS (NM_001145815)	17	NM_001145815	51005	Hs.740430	NM_015944	ENSG00000162066	AMDHD2	CGI-14	amidohydrolase domain containing 2	protein-coding	42.37
chr6-11	chr6	63352914	63353172	Intergenic	Intergenic	-33066	NM_016571	51557	Hs.149585	NM_016571	ENSG00000146166	LGSN	GLULD1|LGS	lengsin, lens protein with glutamine synthetase domain	protein-coding	42.33
chr22-8	chr22	42533369	42533638	Intergenic	LTR13|LTR|ERVK	-13680	NM_015703	27341	Hs.745006	NM_015703	ENSG00000189306	RRP7A	BK126B4.3|CGI-96|Rrp7	ribosomal RNA processing 7 homolog A	protein-coding	42.26
chr13-8	chr13	52921205	52921474	Intergenic	Intergenic	-72699	NM_002590	5100	Hs.19492	NM_002590	ENSG00000136099	PCDH8	ARCADLIN|PAPC	protocadherin 8	protein-coding	42.1
chr3-14	chr3	15345795	15346064	Intergenic	MLT1G1|LTR|ERVL-MaLR	-4535	NM_001018009	9467	Hs.257761	NM_004844	ENSG00000131370	SH3BP5	SAB|SH3BP-5	SH3 domain binding protein 5	protein-coding	41.86
chr6-15	chr6	24774835	24775091	Promoter	promoter-TSS (NM_001251991)	32	NM_001251989	51053	Hs.234896	NM_015895	ENSG00000112312	GMNN	Gem|MGORS6	geminin, DNA replication inhibitor	protein-coding	41.79
chr19-63	chr19	48501715	48501961	Genebody	intron (NM_001080434, intron 8 of 15)	11351	NM_001080434	114783	Hs.207426	NM_001080434	ENSG00000142235	LMTK3	LMR3|PPP1R101|TYKLM3	lemur tyrosine kinase 3	protein-coding	41.75
chr6-13	chr6	6684539	6684804	Intergenic	Tigger6a|DNA|TcMar-Tigger	-61845	NR_026970	285780	Hs.655737	NM_173675	ENSG00000216863	LY86-AS1	LY86-AS|LY86AS	LY86 antisense RNA 1	ncRNA	41.62
chr22-11	chr22	44026947	44027216	Promoter	intron (NM_001243386, intron 1 of 11)	777	NM_001243386	29780	Hs.475074	NM_013327	ENSG00000188677	PARVB	CGI-56	parvin beta	protein-coding	41.54
chr1-80	chr1	1505102	1505368	Intergenic	LTR13|LTR|ERVK	-6908	NM_018188	55210	Hs.23413	NM_018188	ENSG00000197785	ATAD3A	HAYOS	ATPase family, AAA domain containing 3A	protein-coding	41.27
chr1-73	chr1	10472491	10472760	Promoter	promoter-TSS (NM_004401)	-69	NM_213566	1676	Hs.484782	NM_004401	ENSG00000160049	DFFA	DFF-45|DFF1|ICAD	DNA fragmentation factor subunit alpha	protein-coding	41.21
chr7-12	chr7	5229982	5230251	Genebody	intron (NM_001278299, intron 12 of 12)	15847	NM_001033520	26100	Hs.122363	NM_015610	ENSG00000157954	WIPI2	ATG18B|Atg21|CGI-50|WIPI-2	WD repeat domain, phosphoinositide interacting 2	protein-coding	41.16
chr19-38	chr19	58466859	58467128	Promoter	promoter-TSS (NM_014347)	-52	NM_014347	25799	Hs.515660	NM_014347	ENSG00000083812	ZNF324	ZF5128|ZNF324A	zinc finger protein 324	protein-coding	41.13
chr22-5	chr22	17628666	17628935	Promoter	promoter-TSS (NM_001696)	22	NM_001039366	529	Hs.517338	NM_001696	ENSG00000131100	ATP6V1E1	ARCL2C|ATP6E|ATP6E2|ATP6V1E|P31|Vma4	ATPase H+ transporting V1 subunit E1	protein-coding	40.95
chr1-63	chr1	156457266	156457534	Intergenic	CpG	-27852	NM_001320453	10485	Hs.380027	NM_006365	ENSG00000125462	C1orf61	CROC4	chromosome 1 open reading frame 61	protein-coding	40.94
chr8-8	chr8	60792895	60793158	Genebody	intron (NM_017780, intron 3 of 37)	51767	NM_001316690	55636	Hs.20395	NM_017780	ENSG00000171316	CHD7	CRG|HH5|IS3|KAL5	chromodomain helicase DNA binding protein 7	protein-coding	40.89
chr2-7	chr2	20186565	20186834	Intergenic	Intergenic	38467	NM_002997	6382	Hs.224607	NM_002997	ENSG00000115884	SDC1	CD138|SDC|SYND1|syndecan	syndecan 1	protein-coding	40.81
chr4-17	chr4	3047813	3048082	Intergenic	LTR13_|LTR|ERVK	26567	NR_045414	100750326	Hs.575112	NR_045414		HTT-AS	HTT-AS1|HTTAS	HTT antisense RNA	ncRNA	40.54
chr2-20	chr2	203239146	203239415	Promoter	CpG	839	NM_177538	57404	Hs.446065	NM_020674	ENSG00000119004	CYP20A1	CYP-M	cytochrome P450 family 20 subfamily A member 1	protein-coding	40.3
chr17-42	chr17	1724530	1724799	Promoter	promoter-TSS (NM_001163809).2	124	NM_001163811	124997	Hs.234572	NM_152348	ENSG00000167716	WDR81	CAMRQ2|PPP1R166|SORF-2	WD repeat domain 81	protein-coding	40.2
chr2-6	chr2	25279312	25279581	Genebody	intron (NM_022552, intron 4 of 22)	-27131	NM_153759	1788	Hs.515840	NM_022552	ENSG00000119772	DNMT3A	DNMT3A2|M.HsaIIIA|TBRS	DNA methyltransferase 3 alpha	protein-coding	39.87
chr1-95	chr1	150213603	150213864	Intergenic	Intergenic	20945	NM_001136479	81611	Hs.656466	NM_030920	ENSG00000143401	ANP32E	LANP-L|LANPL	acidic nuclear phosphoprotein 32 family member E	protein-coding	39.71
chr20-8	chr20	13784771	13785040	Promoter	promoter-TSS (NM_024120)	-19	NM_016649	51575	Hs.369284	NM_016649	ENSG00000089048	ESF1	ABTAP|C20orf6|HDCMC28P|bA526K24.1	ESF1 nucleolar pre-rRNA processing protein homolog	protein-coding	39.71
chr13-9	chr13	113041382	113041651	Genebody	intron (NM_001320815, intron 3 of 30)	39802	NM_001320817	23263	Hs.170422	NM_024979	ENSG00000126217	MCF2L	ARHGEF14|DBS|OST	MCF.2 cell line derived transforming sequence like	protein-coding	39.66
chr5-20	chr5	36725072	36725326	Intergenic	Intergenic	118844	NM_001166695	6507	Hs.481918	NM_004172	ENSG00000079215	SLC1A3	EA6|EAAT1|GLAST|GLAST1	solute carrier family 1 member 3	protein-coding	39.02
chr1-83	chr1	236604689	236604958	Promoter	promoter-TSS (NM_018072)	-282	NM_018072	55127	Hs.708114	NM_018072	ENSG00000119285	HEATR1	BAP28|UTP10	HEAT repeat containing 1	protein-coding	38.99
chr19-39	chr19	2427825	2428088	Promoter	promoter-TSS (NM_012458)	-40	NM_012458	26517	Hs.75056	NM_012458	ENSG00000099800	TIMM13	TIM13|TIM13B|TIMM13A|TIMM13B|ppv1	translocase of inner mitochondrial membrane 13	protein-coding	38.94
chr17-33	chr17	40596656	40596925	Intergenic	Intergenic	-31306	NM_001838	1236	Hs.370036	NM_001838	ENSG00000126353	CCR7	BLR2|CC-CKR-7|CCR-7|CD197|CDw197|CMKBR7|EBI1	C-C motif chemokine receptor 7	protein-coding	38.93
chr20-22	chr20	63434834	63435092	Genebody	L1MB5|LINE|L1	37714	NM_004518	3785	Hs.161851	NM_004518	ENSG00000075043	KCNQ2	BFNC|EBN|EBN1|ENB1|HNSPC|KCNA11|KV7.2	potassium voltage-gated channel subfamily Q member 2	protein-coding	38.83
chr19-24	chr19	5720197	5720444	Promoter	promoter-TSS (NM_004793)	-62	NM_004793	9361	Hs.350265	NM_004793	ENSG00000196365	LONP1	CODASS|LON|LONP|LonHS|PIM1|PRSS15|hLON	lon peptidase 1, mitochondrial	protein-coding	38.81
chr1-71	chr1	32013501	32013770	Promoter	promoter-TSS (NM_001271878)	-59	NR_073498	10657	Hs.445893	NM_006559	ENSG00000121774	KHDRBS1	Sam68|p62|p68	KH RNA binding domain containing, signal transduction associated 1	protein-coding	38.77
chr19-32	chr19	11435211	11435480	Promoter	promoter-TSS (NM_001289102)	88	NM_001001329	5589	Hs.610830	NM_002743	ENSG00000130175	PRKCSH	AGE-R2|G19P1|GIIB|PCLD|PCLD1|PKCSH|PLD1|VASAP-60	protein kinase C substrate 80K-H	protein-coding	38.72
chr3-23	chr3	52057196	52057465	Promoter	promoter-TSS (NM_001947)	-885	NM_001947	1849	Hs.591664	NM_001947	ENSG00000164086	DUSP7	MKPX|PYST2	dual specificity phosphatase 7	protein-coding	38.34
chr17-43	chr17	64145733	64145997	Promoter	promoter-TSS (NR_132278)	-105	NR_132278	105376843	Hs.405444	NR_132278	ENSG00000266402	SNHG25	-	small nucleolar RNA host gene 25	ncRNA	38.25
chr19-47	chr19	1853437	1853706	Genebody	3' UTR (NM_031918, exon 2 of 2)	-5118	NM_020695	57455	Hs.192477	NM_020695	ENSG00000079313	REXO1	ELOABP1|EloA-BP1|REX1|TCEB3BP1	RNA exonuclease 1 homolog	protein-coding	38.24
chr15-11	chr15	72636818	72637078	Promoter	promoter-TSS (NR_135684)	7	NR_135685	102723640	Hs.154829	NR_135684	ENSG00000259783	LINC02259	-	long intergenic non-protein coding RNA 2259	ncRNA	38.2
chr4-19	chr4	142566830	142567099	Genebody	intron (NM_003866, intron 2 of 26)	279571	NM_001331040	8821	Hs.176376	NM_003866	ENSG00000109452	INPP4B	-	inositol polyphosphate-4-phosphatase type II B	protein-coding	37.89
chr12-20	chr12	4137109	4137378	Intergenic	MIRc|SINE|MIR	-136493	NM_001759	894	Hs.376071	NM_001759	ENSG00000118971	CCND2	KIAK0002|MPPH3	cyclin D2	protein-coding	37.86
chr1-84	chr1	154936393	154936662	Promoter	5' UTR (NM_001323011, exon 1 of 5)	106	NM_001323011	10654	Hs.30954	NM_006556	ENSG00000163344	PMVK	HUMPMKI|PMK|PMKA|PMKASE|POROK1	phosphomevalonate kinase	protein-coding	37.83
chr11-15	chr11	269107	269374	Intergenic	L1MB4|LINE|L1	-9330	NM_001276700	171389	Hs.352611	NM_138329	ENSG00000174885	NLRP6	AVR|CLR11.4|NALP6|NAVR|NAVR/AVR|PAN3|PYPAF5	NLR family pyrin domain containing 6	protein-coding	37.66
chr19-33	chr19	38048371	38048640	Genebody	intron (NM_015073, intron 2 of 21)	-114591	NR_145800	109623473		NR_145800		SNORD152	-	small nucleolar RNA, C/D box 152	snoRNA	37.22
chr21-5	chr21	42078202	42078411	Genebody	intron (NM_001004416, intron 2 of 22)	6989	NM_001004416	89766	Hs.242520	NM_173568	ENSG00000177398	UMODL1	-	uromodulin like 1	protein-coding	37.13
chr3-24	chr3	57555914	57556179	Promoter	promoter-TSS (NM_001322177)	-201	NM_177966	201626	Hs.572993	NM_177966	ENSG00000174840	PDE12	2'-PDE|2-PDE	phosphodiesterase 12	protein-coding	37.07
chr20-10	chr20	589418	589681	Intergenic	MLT1K|LTR|ERVL-MaLR	20717	NM_004609	6939	Hs.437	NM_004609	ENSG00000125878	TCF15	EC2|PARAXIS|bHLHa40	transcription factor 15	protein-coding	36.78
chr6-17	chr6	41288469	41288738	Promoter	Intergenic	-1858	NM_001242590	54210	Hs.283022	NM_018643	ENSG00000124731	TREM1	CD354|TREM-1	triggering receptor expressed on myeloid cells 1	protein-coding	36.73
chr12-21	chr12	103505614	103505882	Intergenic	Intergenic	9708	NR_135004	105369945	Hs.742785	NR_135004		LOC105369945	-	uncharacterized LOC105369945	ncRNA	36.52
chr7-24	chr7	44633531	44633784	Genebody	intron (NM_001003941, intron 2 of 8)	27135	NM_001003941	4967	Hs.488181	NM_002541	ENSG00000105953	OGDH	AKGDH|E1k|OGDC	oxoglutarate dehydrogenase	protein-coding	36.43
chr5-29	chr5	120457891	120458160	Intergenic	LTR13|LTR|ERVK	-6253	NM_001300783	51334	Hs.157461	NM_016644	ENSG00000184838	PRR16	DSC54|LARGEN	proline rich 16	protein-coding	36.38
chr2-9	chr2	207711296	207711565	Promoter	promoter-TSS (NM_001330218)	-110	NM_152523	151195	Hs.471234	NM_152523	ENSG00000163249	CCNYL1	-	cyclin Y like 1	protein-coding	36.28
chr14-13	chr14	67359666	67359919	Promoter	promoter-TSS (NM_004094)	211	NM_015994	51382	Hs.272630	NM_015994	ENSG00000100554	ATP6V1D	ATP6M|VATD|VMA8	ATPase H+ transporting V1 subunit D	protein-coding	36.2
chr14-18	chr14	91114442	91114711	Promoter	promoter-TSS (NM_001286471)	-59	NM_001102367	80017	Hs.309849	NM_024952	ENSG00000133943	DGLUCY	C14orf159	D-glutamate cyclase	protein-coding	36.2
chr1-82	chr1	206563039	206563308	Genebody	MLT1J2|LTR|ERVL-MaLR	6009	NM_182665	83593	Hs.497579	NM_031437	ENSG00000266094	RASSF5	Maxp1|NORE1|NORE1A|NORE1B|RAPL|RASSF3	Ras association domain family member 5	protein-coding	36.06
chr19-26	chr19	1275740	1276009	Promoter	CpG	353	NM_017914	55009	Hs.591383	NM_017914	ENSG00000228300	C19orf24	-	chromosome 19 open reading frame 24	protein-coding	36.04
chr17-40	chr17	39199955	39200218	Promoter	promoter-TSS (NM_000981)	-197	NM_000981	6143	Hs.381061	NM_000981	ENSG00000108298	RPL19	L19	ribosomal protein L19	protein-coding	36.01
chr12-13	chr12	46392780	46393049	Genebody	intron (NR_125381, intron 2 of 2)	8807	NR_125381	100288798	Hs.525922	NR_125377		LOC100288798	-	uncharacterized LOC100288798	ncRNA	35.88
chr9-23	chr9	135499779	135500048	Promoter	promoter-TSS (NM_016034)	2	NM_001048265	138162	Hs.414028	NM_144654	ENSG00000160345	C9orf116	PIERCE1|RbEST47	chromosome 9 open reading frame 116	protein-coding	35.69
chr12-17	chr12	53006299	53006568	Promoter	5' UTR (NM_001300821, exon 1 of 15)	175	NM_001417	1975	Hs.648394	NM_001417	ENSG00000063046	EIF4B	EIF-4B|PRO1843	eukaryotic translation initiation factor 4B	protein-coding	35.55
chr18-5	chr18	45106429	45106698	Intergenic	MER3|DNA|hAT-Charlie	-106419	NM_001242692	8170	Hs.710927	NM_007163	ENSG00000132874	SLC14A2	HUT2|UT-A2|UT2|UTA|UTR|hUT-A6	solute carrier family 14 member 2	protein-coding	35.39
chr11-17	chr11	121023915	121024184	Promoter	promoter-TSS (NM_001130047)	-23	NM_001130047	219899	Hs.504136	NM_152715	ENSG00000154114	TBCEL	El|LRRC35	tubulin folding cofactor E like	protein-coding	35.39
chr10-18	chr10	67884439	67884708	Promoter	promoter-TSS (NM_001142498)	-96	NM_012238	23411	Hs.369779	NM_012238	ENSG00000096717	SIRT1	SIR2|SIR2L1|SIR2alpha	sirtuin 1	protein-coding	35.23
chr13-7	chr13	110372208	110372477	Genebody	intron (NM_001846, intron 4 of 47)	31384	NR_107040	102465872		NR_107040	ENSG00000276765	MIR8073	hsa-mir-8073	microRNA 8073	ncRNA	35.02
chr16-63	chr16	85027468	85027737	Promoter	promoter-TSS (NM_014732)	-149	NM_001286566	9764	Hs.301658	NM_014732	ENSG00000135709	KIAA0513	-	KIAA0513	protein-coding	34.99
chr9-15	chr9	137738391	137738659	Genebody	L1MB3|LINE|L1	49881	NR_147508	651337	Hs.603195	NR_147508	ENSG00000255585	LOC651337	-	uncharacterized LOC651337	ncRNA	34.82
chr21-6	chr21	43938696	43938965	Genebody	MLT1F1|LTR|ERVL-MaLR	13432	NM_001037553	56894	Hs.248785	NM_020132	ENSG00000160216	AGPAT3	LPAAT-GAMMA1|LPAAT3	1-acylglycerol-3-phosphate O-acyltransferase 3	protein-coding	34.77
chr1-113	chr1	111217261	111217519	Intergenic	MLT1L|LTR|ERVL-MaLR	-10269	NM_001025197	1117	Hs.514840	NM_004000	ENSG00000064886	CHI3L2	CHIL2|YKL-39|YKL39	chitinase 3 like 2	protein-coding	34.75
chr12-18	chr12	113185446	113185712	Promoter	promoter-TSS (NM_032848)	53	NM_001286215	84934	Hs.524762	NM_032848	ENSG00000139405	RITA1	C12orf52|RITA	RBPJ interacting and tubulin associated 1	protein-coding	34.57
chr16-45	chr16	89362357	89362626	Genebody	intron (NR_045839, intron 2 of 9)	41358	NM_001242885	100287036	Hs.656995	NM_001242885		LOC100287036	-	uncharacterized LOC100287036	protein-coding	34.56
chrX-15	chrX	57233075	57233344	Intergenic	Intergenic	-53468	NR_148557	158584	Hs.496205	NM_174912	ENSG00000165591	FAAH2	AMDD	fatty acid amide hydrolase 2	protein-coding	34.48
chr19-34	chr19	47113089	47113355	Promoter	intron (NM_015168, intron 1 of 14)	530	NM_015168	23211	Hs.104661	NM_015168	ENSG00000130749	ZC3H4	C19orf7	zinc finger CCCH-type containing 4	protein-coding	34.46
chr19-31	chr19	6425006	6425273	Promoter	promoter-TSS (NM_003685)	-328	NM_003685	8570	Hs.727344	NM_003685	ENSG00000088247	KHSRP	FBP2|FUBP2|KSRP	KH-type splicing regulatory protein	protein-coding	34.39
chr15-10	chr15	41661794	41662060	Promoter	CpG	1515	NM_001080541	23269	Hs.187569	NM_001080541	ENSG00000174197	MGA	MAD5|MXD5	MGA, MAX dimerization protein	protein-coding	34.3
chrX-13	chrX	101617861	101618125	Promoter	promoter-TSS (NM_019007)	8	NM_001184768	54470	Hs.83530	NM_019007	ENSG00000198960	ARMCX6	GASP10	armadillo repeat containing, X-linked 6	protein-coding	34.18
chr10-12	chr10	14008461	14008730	Promoter	promoter-TSS (NM_001318336)	-62	NM_001318336	55691	Hs.330463	NM_018027	ENSG00000151474	FRMD4A	CCAFCA|FRMD4|bA295P9.4	FERM domain containing 4A	protein-coding	34.16
chr19-37	chr19	4471954	4472223	Promoter	promoter-TSS (NM_032631)	-108	NM_032631	84717	Hs.43071	NM_032631	ENSG00000167674	HDGFL2	HDGF-2|HDGF2|HDGFRP2|HRP-2|HRP2	HDGF like 2	protein-coding	34.13
chr2-27	chr2	177212591	177212860	Promoter	promoter-TSS (NR_039646)	-1	NR_039646	100616394		NR_039646	ENSG00000284252	MIR4444-1	MIR4444|hsa-mir-4444-1	microRNA 4444-1	ncRNA	34.13
chr9-19	chr9	33290375	33290629	Promoter	promoter-TSS (NM_001318758)	85	NM_001318758	4799	Hs.413074	NM_002504	ENSG00000086102	NFX1	NFX2|TEG-42|Tex42	nuclear transcription factor, X-box binding 1	protein-coding	33.82
chr1-86	chr1	151198324	151198593	Promoter	promoter-TSS (NM_001135637)	-86	NM_001330689	8394	Hs.655131	NM_003557	ENSG00000143398	PIP5K1A	-	phosphatidylinositol-4-phosphate 5-kinase type 1 alpha	protein-coding	33.81
chr11-24	chr11	113875660	113875929	Promoter	promoter-TSS (NM_001346257)	-224	NM_001346255	57646	Hs.503891	NM_020886	ENSG00000048028	USP28	-	ubiquitin specific peptidase 28	protein-coding	33.67
chr1-85	chr1	230123946	230124215	Genebody	intron (NM_004481, intron 1 of 15)	56885	NM_004481	2590	Hs.743964	NM_004481	ENSG00000143641	GALNT2	GalNAc-T2	polypeptide N-acetylgalactosaminyltransferase 2	protein-coding	33.65
chr2-21	chr2	176002236	176002505	Promoter	promoter-TSS (NM_030650)	-25	NM_030650	80856	Hs.209561	NM_030650	ENSG00000144320	LNPK	KIAA1715|LNP|LNP1|Ul|ulnaless	lunapark, ER junction formation factor	protein-coding	33.59
chr3-26	chr3	184314304	184314573	Promoter	promoter-TSS (NM_001291157)	-57	NM_198241	1981	Hs.433750	NM_004953	ENSG00000114867	EIF4G1	EIF-4G1|EIF4F|EIF4G|EIF4GI|P220|PARK18	eukaryotic translation initiation factor 4 gamma 1	protein-coding	33.46
chr1-100	chr1	42455944	42456213	Promoter	promoter-TSS (NM_001287508)	8	NM_001355226	728621	Hs.729640	NM_001080850	ENSG00000186409	CCDC30	PFD6L|PFDN6L	coiled-coil domain containing 30	protein-coding	33.38
chr22-9	chr22	23974426	23974695	Promoter	promoter-TSS (NM_001084392)	-69	NM_001084392	1652	Hs.656723	NM_001355	ENSG00000099977	DDT	D-DT|DDCT|MIF-2|MIF2	D-dopachrome tautomerase	protein-coding	33.35
chr20-9	chr20	23358061	23358330	Promoter	promoter-TSS (NR_109884)	-68	NR_109884	100505683	Hs.140295	NR_109884	ENSG00000232645	LINC01431	-	long intergenic non-protein coding RNA 1431	ncRNA	33.16
chr19-28	chr19	12737318	12737587	Promoter	promoter-TSS (NM_004317)	-7	NM_004317	439	Hs.465985	NM_004317	ENSG00000198356	ASNA1	ARSA-I|ARSA1|ASNA-I|GET3|TRC40	arsA arsenite transporter, ATP-binding, homolog 1 (bacterial)	protein-coding	33.08
chr11-23	chr11	65477479	65477748	Intergenic	CpG	-20125	NR_144567	378938	Hs.621695	NR_002819	ENSG00000251562	MALAT1	HCN|LINC00047|NCRNA00047|NEAT2|PRO2853	metastasis associated lung adenocarcinoma transcript 1 (non-protein coding)	ncRNA	33.03
chr17-44	chr17	62065850	62066119	Promoter	promoter-TSS (NM_005121)	-702	NM_005121	9969	Hs.282678	NM_005121	ENSG00000108510	MED13	ARC250|DRIP250|HSPC221|THRAP1|TRAP240	mediator complex subunit 13	protein-coding	32.92
chr22-10	chr22	23966625	23966894	Promoter	promoter-TSS (NM_001084393)	-79	NM_001084393	100037417	Hs.744172	NM_001084393	ENSG00000099974	DDTL	KB-226F1.2	D-dopachrome tautomerase like	protein-coding	32.9
chr3-22	chr3	124834988	124835255	Genebody	intron (NM_002213, intron 5 of 14)	52184	NM_002213	3693	Hs.13155	NM_002213	ENSG00000082781	ITGB5	-	integrin subunit beta 5	protein-coding	32.76
chr14-21	chr14	23320848	23321117	Promoter	promoter-TSS (NM_001360551)	-475	NM_001360551	8106	Hs.707712	NM_004643	ENSG00000100836	PABPN1	OPMD|PAB2|PABII|PABP-2|PABP2	poly(A) binding protein nuclear 1	protein-coding	32.76
chr19-45	chr19	50369245	50369514	Intergenic	MLT1J2|LTR|ERVL-MaLR	-3549	NM_004851	9476	Hs.512843	NM_004851	ENSG00000131400	NAPSA	KAP|Kdap|NAP1|NAPA|SNAPA	napsin A aspartic peptidase	protein-coding	32.63
chr10-60	chr10	77772952	77773221	Intergenic	LTR13A|LTR|ERVK	-135267	NM_001271520	3778	Hs.144795	NM_002247	ENSG00000156113	KCNMA1	BKTM|CADEDS|KCa1.1|MaxiK|PNKD3|SAKCA|SLO|SLO-ALPHA|SLO1|bA205K10.1|hSlo|mSLO1	potassium calcium-activated channel subfamily M alpha 1	protein-coding	32.6
chr10-15	chr10	26430959	26431228	Intergenic	Intergenic	-7244	NM_019043	54518	Hs.310421	NM_019043	ENSG00000077420	APBB1IP	INAG1|PREL1|RARP1|RIAM	amyloid beta precursor protein binding family B member 1 interacting protein	protein-coding	32.6
chr5-25	chr5	40486481	40486746	Intergenic	Intergenic	-193317	NM_000958	5734	Hs.199248	NM_000958	ENSG00000171522	PTGER4	EP4|EP4R	prostaglandin E receptor 4	protein-coding	32.52
chr2-38	chr2	25210041	25210310	Genebody	TTS (NR_132378)	5862	NR_132378	106144568	Hs.580474	NR_132378	ENSG00000230452	LINC01381	DADOT	long intergenic non-protein coding RNA 1381	ncRNA	32.49
chr16-47	chr16	74695889	74696158	Genebody	MLT1J2|LTR|ERVL-MaLR	5125	NM_001142497	197259	Hs.119878	NM_152649	ENSG00000168404	MLKL	hMLKL	mixed lineage kinase domain like pseudokinase	protein-coding	32.47
chr19-55	chr19	14366689	14366958	Intergenic	MLT1I|LTR|ERVL-MaLR	-2833	NR_134908	105372288	Hs.628463	NR_134908	ENSG00000266913	LINC01841	-	long intergenic non-protein coding RNA 1841	ncRNA	32.33
chr15-12	chr15	40565078	40565347	Promoter	promoter-TSS (NM_052849)	-155	NM_001080792	90416	Hs.654661	NM_052849	ENSG00000128891	CCDC32	C15orf57	coiled-coil domain containing 32	protein-coding	32.28
chr2-18	chr2	130342540	130342796	Promoter	promoter-TSS (NM_001321118)	13	NM_001321118	84317	Hs.104203	NM_032357	ENSG00000136710	CCDC115	CDG2O|ccp1	coiled-coil domain containing 115	protein-coding	32.11
chr15-35	chr15	78353165	78353434	Intergenic	Intergenic	12975	NM_004378	1381	Hs.346950	NM_004378	ENSG00000166426	CRABP1	CRABP|CRABP-I|CRABPI|RBP5	cellular retinoic acid binding protein 1	protein-coding	32.01
chr1-94	chr1	226083364	226083633	Promoter	promoter-TSS (NR_146920)	-77	NR_146920	105373113	Hs.149726	NR_146920		LINC01703	-	long intergenic non-protein coding RNA 1703	ncRNA	31.96
chr17-59	chr17	2266105	2266366	Promoter	promoter-TSS (NM_001256827)	-36	NM_001256827	23293	Hs.448342	NM_017575	ENSG00000070366	SMG6	C17orf31|EST1A|SMG-6|hSMG5/7a	SMG6, nonsense mediated mRNA decay factor	protein-coding	31.89
chr20-14	chr20	18137892	18138153	Promoter	exon (NM_001164811, exon 1 of 2)	167	NM_001164811	100303755	Hs.488051	NM_001164811	ENSG00000232838	PET117	CSRP2BP	PET117 homolog	protein-coding	31.66
chr5-26	chr5	149960565	149960834	Promoter	promoter-TSS (NM_000112)	-38	NM_000112	1836	Hs.302738	NM_000112	ENSG00000155850	SLC26A2	D5S1708|DTD|DTDST|EDM4|MST153|MSTP157	solute carrier family 26 member 2	protein-coding	31.66
chr9-30	chr9	87479816	87480077	Intergenic	Intergenic	-17282	NM_001288731	1612	Hs.380277	NM_004938	ENSG00000196730	DAPK1	DAPK|ROCO3	death associated protein kinase 1	protein-coding	31.5
chr5-22	chr5	110738813	110739082	Promoter	promoter-TSS (NM_001303249)	-25	NM_001303249	91137	Hs.75639	NM_138773	ENSG00000164209	SLC25A46	HMSN6B	solute carrier family 25 member 46	protein-coding	31.37
chr7-14	chr7	100148757	100149020	Promoter	promoter-TSS (NM_001318236)	-11	NM_001318237	389541	Hs.406520	NM_001008395	ENSG00000188186	LAMTOR4	C7orf59	late endosomal/lysosomal adaptor, MAPK and MTOR activator 4	protein-coding	31.37
chr21-49	chr21	42609846	42610107	Genebody	MLT1I|LTR|ERVL-MaLR	5119	NR_131192	101928233	Hs.534827	NR_131192	ENSG00000225431	LINC01671	-	long intergenic non-protein coding RNA 1671	ncRNA	31.36
chr16-51	chr16	2047736	2048005	Promoter	promoter-TSS (NM_001318829)	-1	NM_001318193	4913	Hs.66196	NM_002528	ENSG00000065057	NTHL1	FAP3|NTH1|OCTS3|hNTH1	nth like DNA glycosylase 1	protein-coding	31.34
chr1-97	chr1	171485283	171485544	Promoter	promoter-TSS (NM_015172)	-114	NM_015172	23215	Hs.494614	NM_015172	ENSG00000117523	PRRC2C	BAT2-iso|BAT2D1|BAT2L2|XTP2	proline rich coiled-coil 2C	protein-coding	31.28
chr11-29	chr11	518831	519100	Intergenic	CpG	-11682	NM_203389	6050	Hs.530687	NM_002939	ENSG00000023191	RNH1	RAI|RNH	ribonuclease/angiogenin inhibitor 1	protein-coding	31.26
chr1-87	chr1	173476894	173477163	Promoter	promoter-TSS (NM_004905)	127	NR_037845	100506023	Hs.731284	NR_037845		LOC100506023	-	uncharacterized LOC100506023	ncRNA	31.1
chr5-28	chr5	14174405	14174674	Genebody	intron (NR_134469, intron 1 of 56)	30837	NM_007118	7204	Hs.130031	NM_007118	ENSG00000038382	TRIO	ARHGEF23|MEBAS|MRD44|tgat	trio Rho guanine nucleotide exchange factor	protein-coding	30.96
chr14-25	chr14	92106652	92106921	Promoter	promoter-TSS (NR_028465)	-165	NM_001164782	4287	Hs.532632	NM_004993	ENSG00000066427	ATXN3	AT3|ATX3|JOS|MJD|MJD1|SCA3	ataxin 3	protein-coding	30.88
chr17-35	chr17	78474789	78475056	Genebody	intron (NM_173628, intron 54 of 80)	-9988	NR_102401	100996295	Hs.615304	NR_102401		DNAH17-AS1	-	DNAH17 antisense RNA 1	ncRNA	30.87
chr11-21	chr11	108008824	108009090	Promoter	5' UTR (NM_003478, exon 1 of 19)	224	NM_003478	8065	Hs.440320	NM_003478	ENSG00000166266	CUL5	CUL-5|VACM-1|VACM1	cullin 5	protein-coding	30.85
chr21-9	chr21	6676755	6677024	Intergenic	Intergenic	114969	NM_001320719	102724652	Hs.184085	NM_001314050	ENSG00000276076	CRYAA2	CRYAA	crystallin alpha A2	protein-coding	30.8
chr17-38	chr17	63773759	63774023	Promoter	promoter-TSS (NM_020198)	-163	NM_020198	57003	Hs.202011	NM_020198	ENSG00000108588	CCDC47	GK001|MSTP041	coiled-coil domain containing 47	protein-coding	30.73
chr1-96	chr1	42682188	42682448	Promoter	promoter-TSS (NM_004559)	83	NM_004559	4904	Hs.473583	NM_004559	ENSG00000065978	YBX1	BP-8|CBF-A|CSDA2|CSDB|DBPB|EFI-A|MDR-NF1|NSEP-1|NSEP1|YB-1|YB1	Y-box binding protein 1	protein-coding	30.7
chr6-14	chr6	44257193	44257462	Promoter	promoter-TSS (NM_001286512)	25	NM_001286510	347734	Hs.182885	NM_178148	ENSG00000157593	SLC35B2	PAPST1|SLL|UGTrel4	solute carrier family 35 member B2	protein-coding	30.67
chr10-22	chr10	123154101	123154370	Promoter	promoter-TSS (NM_004725)	-9	NM_001007793	9184	Hs.418533	NM_004725	ENSG00000154473	BUB3	BUB3L|hBUB3	BUB3, mitotic checkpoint protein	protein-coding	30.43
chrX-14	chrX	41333418	41333682	Promoter	promoter-TSS (NM_001193417)	242	NM_001356	1654	Hs.728563	NM_001356	ENSG00000215301	DDX3X	CAP-Rf|DBX|DDX14|DDX3|HLP2|MRX102	DEAD-box helicase 3, X-linked	protein-coding	30.38
chr5-21	chr5	173887818	173888084	Promoter	promoter-TSS (NM_001308189)	-377	NM_001308191	80315	Hs.127126	NM_030627	ENSG00000113742	CPEB4	CPE-BP4|hCPEB-4	cytoplasmic polyadenylation element binding protein 4	protein-coding	30.28
chr15-21	chr15	34342991	34343242	Promoter	promoter-TSS (NM_175741)	45	NM_018648	55505	Hs.14317	NM_018648	ENSG00000182117	NOP10	DKCB1|NOLA3|NOP10P	NOP10 ribonucleoprotein	protein-coding	30.28
chr16-48	chr16	4847255	4847518	Promoter	promoter-TSS (NM_001324096)	2	NM_001324096	84656	Hs.387255	NM_032569	ENSG00000140632	GLYR1	BM045|HIBDL|N-PAC|NP60	glyoxylate reductase 1 homolog	protein-coding	30.24
chr19-49	chr19	17407369	17407638	Promoter	LTR13|LTR|ERVK	1817	NM_001304547	93343	Hs.515243	NM_138401	ENSG00000141971	MVB12A	CFBP|FAM125A	multivesicular body subunit 12A	protein-coding	30.19
chr3-30	chr3	40309518	40309787	Promoter	promoter-TSS (NM_005875)	-30	NM_005875	10289	Hs.315230	NM_005875	ENSG00000114784	EIF1B	GC20	eukaryotic translation initiation factor 1B	protein-coding	30.16
chr19-46	chr19	53508201	53508467	Intergenic	HERVL40-int|LTR|ERVL	-12589	NM_018555	55422	Hs.185674	NM_018555	ENSG00000130844	ZNF331	RITA|ZNF361|ZNF463	zinc finger protein 331	protein-coding	30.09
chr7-17	chr7	139340461	139340730	Promoter	promoter-TSS (NM_001244584)	145	NR_073060	154791	Hs.718441	NM_197964	ENSG00000164898	FMC1	C7orf55|HSPC268	formation of mitochondrial complex V assembly factor 1 homolog	protein-coding	30.05
chr21-12	chr21	5508604	5508873	Intergenic	Intergenic	-44899	NM_001322047	102724843	Hs.743984	NM_001322047		LOC102724843	-	uncharacterized LOC102724843	protein-coding	30.05
chr22-13	chr22	40177745	40178010	Promoter	promoter-TSS (NM_015088)	-48	NM_001162501	23112	Hs.372082	NM_015088	ENSG00000100354	TNRC6B	-	trinucleotide repeat containing 6B	protein-coding	30.02
chr3-36	chr3	48990859	48991119	Promoter	intron (NM_177938, intron 2 of 8)	1081	NM_177939	54681	Hs.654944	NM_017732	ENSG00000178467	P4HTM	EGLN4|HIFPH4|P4H-TM|PH-4|PH4|PHD4	prolyl 4-hydroxylase, transmembrane	protein-coding	29.98
chr2-24	chr2	197434992	197435261	Promoter	promoter-TSS (NM_001308824)	-33	NM_001005526	23451	Hs.632554	NM_012433	ENSG00000115524	SF3B1	Hsh155|MDS|PRP10|PRPF10|SAP155|SF3b155	splicing factor 3b subunit 1	protein-coding	29.97
chr11-18	chr11	119121247	119121514	Promoter	promoter-TSS (NM_015517)	-143	NM_001351964	25988	Hs.504091	NM_015517	ENSG00000172273	HINFP	HiNF-P|MIZF|ZNF743	histone H4 transcription factor	protein-coding	29.95
chr3-25	chr3	66220828	66221097	Promoter	promoter-TSS (NM_001350991)	-41	NM_001350991	115286	Hs.379386	NM_173471	ENSG00000144741	SLC25A26	COXPD28|SAMC	solute carrier family 25 member 26	protein-coding	29.92
chr7-19	chr7	5822904	5823163	Promoter	promoter-TSS (NR_023382)	-127	NR_023382	401303	Hs.372707	NR_023382		ZNF815P	ZNF815	zinc finger protein 815, pseudogene	pseudo	29.9
chr1-136	chr1	180213440	180213709	Intergenic	Intergenic	15565	NR_026900	200058	Hs.719176	NR_026900		FLJ23867	-	uncharacterized protein FLJ23867	ncRNA	29.89
chr1-88	chr1	207831818	207832087	Intergenic	Intergenic	-9249	NR_135299	100128537	Hs.445414	NR_135298		MIR29B2CHG	C1orf132	MIR29B2 and MIR29C host gene	ncRNA	29.89
chr8-18	chr8	70669183	70669452	Promoter	promoter-TSS (NM_001287260)	-48	NM_001011720	389668	Hs.458938	NM_001011720	ENSG00000221947	XKR9	XRG9	XK related 9	protein-coding	29.84
chr16-71	chr16	9091065	9091332	Promoter	promoter-TSS (NM_014117)	-482	NM_014117	29035	Hs.221497	NM_014117	ENSG00000182831	C16orf72	PRO0149	chromosome 16 open reading frame 72	protein-coding	29.68
chr13-11	chr13	30373869	30374119	Promoter	promoter-TSS (NR_024464)	-80	NR_024464	100188949	Hs.439791	NR_024464	ENSG00000238121	LINC00426	-	long intergenic non-protein coding RNA 426	ncRNA	29.68
chr7-11	chr7	129224376	129224632	Promoter	promoter-TSS (NM_015328)	-510	NM_015328	23382	Hs.600789	NM_015328	ENSG00000158467	AHCYL2	ADOHCYASE3|IRBIT2	adenosylhomocysteinase like 2	protein-coding	29.6
chr17-37	chr17	64130745	64131014	Promoter	promoter-TSS (NM_001433)	-737	NM_001433	2081	Hs.133982	NM_001433	ENSG00000178607	ERN1	IRE1|IRE1P|IRE1a|hIRE1p	endoplasmic reticulum to nucleus signaling 1	protein-coding	29.57
chr9-26	chr9	129626252	129626519	Promoter	promoter-TSS (NM_001286799)	-59	NM_001286799	28989	Hs.744027	NM_014064	ENSG00000148335	NTMT1	AD-003|C9orf32|HOMT1A|METTL11A|NRMT|NRMT1|NTM1A	N-terminal Xaa-Pro-Lys N-methyltransferase 1	protein-coding	29.55
chr6-19	chr6	7073807	7074065	Intergenic	Intergenic	-33661	NM_001168344	6239	Hs.298248	NM_002955	ENSG00000124782	RREB1	FINB|HNT|LZ321|RREB-1|Zep-1	ras responsive element binding protein 1	protein-coding	29.52
chrX-9	chrX	24479135	24479396	Genebody	intron (NM_001142386, intron 1 of 11)	14038	NM_001142386	5165	Hs.296031	NM_005391	ENSG00000067992	PDK3	CMTX6|GS1-358P8.4	pyruvate dehydrogenase kinase 3	protein-coding	29.45
chr5-19	chr5	131797039	131797308	Promoter	promoter-TSS (NM_001008738)	-110	NM_133372	96459	Hs.591273	NM_133372	ENSG00000217128	FNIP1	-	folliculin interacting protein 1	protein-coding	29.44
chr22-16	chr22	30424092	30424361	Promoter	3' UTR (NM_012429, exon 12 of 12)	-1397	NM_016498	51537	Hs.713636	NM_016498	ENSG00000242114	MTFP1	HSPC242|MTP18	mitochondrial fission process 1	protein-coding	29.44
chr17-58	chr17	64919337	64919606	Promoter	promoter-TSS (NM_001303255)	20	NM_199340	374819	Hs.551962	NM_199340	ENSG00000176809	LRRC37A3	LRRC37|LRRC37A	leucine rich repeat containing 37 member A3	protein-coding	29.41
chr19-62	chr19	17370133	17370386	Genebody	L1MB7|LINE|L1	7090	NM_031310	83483	Hs.107125	NM_031310	ENSG00000130300	PLVAP	FELS|PV-1|PV1|gp68	plasmalemma vesicle associated protein	protein-coding	29.33
chr21-31	chr21	37267293	37267562	Promoter	5' UTR (NM_001331021, exon 1 of 7)	105	NM_006052	10311	Hs.369488	NM_006052	ENSG00000157538	VPS26C	DCRA|DSCR3|DSCRA	VPS26 endosomal protein sorting factor C	protein-coding	29.33
chr6-20	chr6	36358660	36358929	Genebody	intron (NM_001207035, intron 7 of 7)	-21909	NM_001010903	389384	Hs.162104	NM_001010903	ENSG00000189325	C6orf222	-	chromosome 6 open reading frame 222	protein-coding	29.3
chr16-66	chr16	88569981	88570246	Promoter	promoter-TSS (NM_144604)	-268	NM_001294340	124245	Hs.93670	NM_144604	ENSG00000158545	ZC3H18	NHN1	zinc finger CCCH-type containing 18	protein-coding	29.23
chr15-17	chr15	95929289	95929558	Intergenic	Intergenic	-396505	NM_001145155	7026	Hs.347991	NM_021005	ENSG00000185551	NR2F2	ARP1|CHTD4|COUPTF2|COUPTFB|COUPTFII|NF-E3|NR2F1|SVP40|TFCOUP2	nuclear receptor subfamily 2 group F member 2	protein-coding	29.22
chr10-19	chr10	87342530	87342798	Promoter	promoter-TSS (NR_135292)	-72	NR_135292	439994	Hs.651188	NR_029408	ENSG00000224914	LINC00863	-	long intergenic non-protein coding RNA 863	ncRNA	29.22
chr21-11	chr21	7003836	7004103	Intergenic	Intergenic	-44890	NM_001322036	102724951	Hs.743984	NM_001322036		LOC102724951	-	uncharacterized LOC102724951	protein-coding	29.2
chr10-20	chr10	118755027	118755290	Promoter	promoter-TSS (NM_153810)	88	NM_153810	143384	Hs.420024	NM_153810	ENSG00000151893	CACUL1	C10orf46|CAC1	CDK2 associated cullin domain 1	protein-coding	29.17
chr21-14	chr21	7385610	7385876	Intergenic	Intergenic	-44894	NM_001322036	102724951	Hs.743984	NM_001322036		LOC102724951	-	uncharacterized LOC102724951	protein-coding	29.12
chr19-36	chr19	42244685	42244947	Intergenic	CpG	-2232	NM_019884	2931	Hs.466828	NM_019884	ENSG00000105723	GSK3A	-	glycogen synthase kinase 3 alpha	protein-coding	29.09
chr16-53	chr16	4538737	4539005	Promoter	promoter-TSS (NM_001199055)	-56	NM_001199055	29965	Hs.654653	NM_013399	ENSG00000089486	CDIP1	C16orf5|CDIP|I1|LITAFL	cell death inducing p53 target 1	protein-coding	29.03
chr19-30	chr19	39412169	39412436	Promoter	promoter-TSS (NM_022835)	-808	NM_022835	64857	Hs.631574	NM_022835	ENSG00000090924	PLEKHG2	ARHGEF42|CLG|CTB-60E11.4|LDAMD	pleckstrin homology and RhoGEF domain containing G2	protein-coding	28.98
chr17-46	chr17	35567905	35568171	Promoter	promoter-TSS (NR_135479)	-76	NR_135479	105371743		NR_135479		LINC02001	-	long intergenic non-protein coding RNA 2001	ncRNA	28.9
chr12-25	chr12	113966186	113966443	Promoter	promoter-TSS (NM_016196)	57	NM_001146698	9904	Hs.7482	NM_016196	ENSG00000122965	RBM19	Mrd1	RNA binding motif protein 19	protein-coding	28.87
chr15-16	chr15	59412990	59413259	Intergenic	MER74C|LTR|ERVL	-25049	NM_152450	145773	Hs.531168	NM_152450	ENSG00000157470	FAM81A	-	family with sequence similarity 81 member A	protein-coding	28.84
chr6-25	chr6	43383942	43384203	Intergenic	LTR67B|LTR|ERVL	-14629	NM_014345	24149	Hs.509718	NM_014345	ENSG00000171467	ZNF318	HRIHFB2436|TZF|ZFP318	zinc finger protein 318	protein-coding	28.76
chr2-15	chr2	127886097	127886366	Promoter	promoter-TSS (NM_001199140)	-291	NM_001199140	83607	Hs.546449	NM_031445	ENSG00000144233	AMMECR1L	-	AMMECR1 like	protein-coding	28.74
chr12-44	chr12	95942954	95943222	Promoter	promoter-TSS (NM_152435)	-205	NM_152435	144193	Hs.424907	NM_152435	ENSG00000139344	AMDHD1	HMFT1272	amidohydrolase domain containing 1	protein-coding	28.71
chr9-31	chr9	5628490	5628744	Promoter	promoter-TSS (NM_001135920)	-502	NM_001135920	57589	Hs.211520	NM_020829	ENSG00000107036	RIC1	CIP150|KIAA1432|bA207C16.1	RIC1 homolog, RAB6A GEF complex partner 1	protein-coding	28.7
chr10-16	chr10	79826482	79826751	Promoter	promoter-TSS (NR_120613)	-22	NR_120612	101060691	Hs.440648	NR_120611	ENSG00000225484	NUTM2B-AS1	-	NUTM2B antisense RNA 1	ncRNA	28.68
chr2-54	chr2	232697140	232697396	Promoter	promoter-TSS (NR_103495)	-37	NR_103494	26058	Hs.565319	NM_015575	ENSG00000204120	GIGYF2	GYF2|PARK11|PERQ2|PERQ3|TNRC15	GRB10 interacting GYF protein 2	protein-coding	28.67
chr19-57	chr19	39834106	39834375	Promoter	promoter-TSS (NM_004714)	-7	NM_006484	9149	Hs.130988	NM_004714	ENSG00000105204	DYRK1B	AOMS3|MIRK	dual specificity tyrosine phosphorylation regulated kinase 1B	protein-coding	28.66
chr22-15	chr22	49970826	49971073	Intergenic	CpG	8083	NR_106879	102465493		NR_106879	ENSG00000276753	MIR6821	hsa-mir-6821	microRNA 6821	ncRNA	28.61
chr6-33	chr6	105992462	105992731	Intergenic	Intergenic	-93724	NM_001198	639	Hs.436023	NM_001198	ENSG00000057657	PRDM1	BLIMP1|PRDI-BF1	PR/SET domain 1	protein-coding	28.6
chr12-16	chr12	12486757	12487019	Genebody	intron (NM_030640, intron 5 of 6)	75626	NM_030640	80824	Hs.536535	NM_030640	ENSG00000111266	DUSP16	MKP-7|MKP7	dual specificity phosphatase 16	protein-coding	28.54
chr21-20	chr21	46143971	46144238	Genebody	LTR13|LTR|ERVK	-7271	NM_001350598	100861507	Hs.570448	NM_001350598		FTCD-AS1	-	FTCD antisense RNA 1	protein-coding	28.52
chr4-26	chr4	105306414	105306683	Genebody	intron (NR_126420, intron 2 of 5)	46333	NR_126420	104384744	Hs.624109	NR_126420		TET2-AS1	-	TET2 antisense RNA 1	ncRNA	28.5
chr18-8	chr18	3013459	3013727	Promoter	Intergenic	-1646	NM_014646	9663	Hs.132342	NM_014646	ENSG00000101577	LPIN2	-	lipin 2	protein-coding	28.44
chr1-99	chr1	205775310	205775579	Promoter	promoter-TSS (NM_003929)	38	NM_001135664	8934	Hs.115325	NM_003929	ENSG00000117280	RAB29	RAB7L|RAB7L1	RAB29, member RAS oncogene family	protein-coding	28.39
chr16-75	chr16	27748906	27749175	Genebody	intron (NM_015202, intron 15 of 27)	-30011	NR_147898	100128079	Hs.610277	NR_147898		LOC100128079	-	uncharacterized LOC100128079	ncRNA	28.39
chr6-44	chr6	15951060	15951329	Intergenic	(TCAATGT)n|Simple_repeat|Simple_repeat	-177892	NM_013262	29116	Hs.484738	NM_013262	ENSG00000007944	MYLIP	IDOL|MIR	myosin regulatory light chain interacting protein	protein-coding	28.07
chr1-106	chr1	25906348	25906617	Promoter	promoter-TSS (NR_037481)	20	NM_001145454	3925	Hs.209983	NM_005563	ENSG00000117632	STMN1	C1orf215|LAP18|Lag|OP18|PP17|PP19|PR22|SMN	stathmin 1	protein-coding	27.99
chr2-23	chr2	118003309	118003576	Genebody	intron (NM_019044, intron 3 of 23)	10721	NM_019044	54520	Hs.107845	NM_019044	ENSG00000125633	CCDC93	-	coiled-coil domain containing 93	protein-coding	27.9
chr9-22	chr9	71911444	71911686	Promoter	promoter-TSS (NM_016014)	58	NM_182505	138241	Hs.534190	NM_182505	ENSG00000155621	C9orf85	-	chromosome 9 open reading frame 85	protein-coding	27.86
chr11-16	chr11	65418758	65419027	Intergenic	Intergenic	-3906	NR_028272	283131	Hs.523789	NR_002802	ENSG00000245532	NEAT1	LINC00084|NCRNA00084|TncRNA|VINC	nuclear paraspeckle assembly transcript 1 (non-protein coding)	ncRNA	27.85
chr2-17	chr2	27322934	27323194	Promoter	promoter-TSS (NM_002437)	38	NM_002437	4358	Hs.75659	NM_002437	ENSG00000115204	MPV17	MTDPS6|SYM1	MPV17, mitochondrial inner membrane protein	protein-coding	27.68
chr7-18	chr7	32890509	32890774	Promoter	intron (NM_015483, intron 1 of 3)	1215	NM_015483	25948	Hs.372541	NM_015483	ENSG00000170852	KBTBD2	BKLHD1	kelch repeat and BTB domain containing 2	protein-coding	27.65
chr7-40	chr7	158835093	158835362	Intergenic	LTR13A|LTR|ERVK	-4018	NM_001350914	55112	Hs.389945	NM_018051	ENSG00000126870	WDR60	FAP163|SRPS6|SRTD8	WD repeat domain 60	protein-coding	27.64
chr16-52	chr16	30355306	30355574	Promoter	promoter-TSS (NM_006110)	-79	NM_006110	10421	Hs.202677	NM_006110	ENSG00000169217	CD2BP2	FWP010|LIN1|PPP1R59|Snu40|U5-52K	CD2 cytoplasmic tail binding protein 2	protein-coding	27.58
chr21-29	chr21	33383246	33383508	Intergenic	Intergenic	-19519	NM_001329128	3460	Hs.634632	NM_005534	ENSG00000159128	IFNGR2	AF-1|IFGR2|IFNGT1|IMD28	interferon gamma receptor 2	protein-coding	27.58
chr18-10	chr18	80108833	80109102	Promoter	promoter-TSS (NM_014913)	-64	NM_014913	22850	Hs.131915	NM_014913	ENSG00000101544	ADNP2	ZNF508	ADNP homeobox 2	protein-coding	27.56
chr5-41	chr5	140402683	140402951	Promoter	intron (NM_017978, intron 1 of 10)	1003	NM_017747	54882	Hs.594084	NM_017747	ENSG00000131503	ANKHD1	MASK|MASK1|PP2500|VBARP	ankyrin repeat and KH domain containing 1	protein-coding	27.53
chr9-20	chr9	137121932	137122201	Intergenic	LTR13_|LTR|ERVK	-7323	NM_013379	29952	Hs.37916	NM_013379	ENSG00000176978	DPP7	DPP2|DPPII|QPP	dipeptidyl peptidase 7	protein-coding	27.5
chr16-44	chr16	21501165	21501431	Promoter	intron (NR_027155, intron 1 of 28)	983	NR_027155	100271836	Hs.552700	NR_027155	ENSG00000180747	SMG1P3	-	SMG1 pseudogene 3	pseudo	27.49
chr19-51	chr19	38618957	38619226	Promoter	promoter-TSS (NM_001300992)	17	NM_001300992	27335	Hs.314359	NM_013234	ENSG00000178982	EIF3K	ARG134|EIF3-p28|EIF3S12|HSPC029|M9|MSTP001|PLAC-24|PLAC24|PRO1474|PTD001	eukaryotic translation initiation factor 3 subunit K	protein-coding	27.48
chr14-19	chr14	92768393	92768658	Intergenic	Intergenic	-19823	NM_005606	5641	Hs.18069	NM_005606	ENSG00000100600	LGMN	AEP|LGMN1|PRSC1	legumain	protein-coding	27.43
chr1-110	chr1	92975710	92975975	Intergenic	L2b|LINE|L2	-14320	NM_001006605	388650	Hs.180946	NM_001006605	ENSG00000154511	FAM69A	-	family with sequence similarity 69 member A	protein-coding	27.4
chr1-108	chr1	154983080	154983349	Promoter	promoter-TSS (NM_001184891)	-80	NM_001184891	80308	Hs.118666	NM_025207	ENSG00000160688	FLAD1	FAD1|FADS|LSMFLAD|PP591	flavin adenine dinucleotide synthetase 1	protein-coding	27.4
chr2-44	chr2	151826784	151827047	Promoter	intron (NM_177985, intron 1 of 5)	1580	NM_177985	26225	Hs.470233	NM_012097	ENSG00000162980	ARL5A	ARFLP5|ARL5	ADP ribosylation factor like GTPase 5A	protein-coding	27.36
chr3-27	chr3	113754600	113754865	Genebody	intron (NM_001690, intron 1 of 14)	7713	NM_001690	523	Hs.477155	NM_001690	ENSG00000114573	ATP6V1A	ARCL2D|ATP6A1|ATP6V1A1|HO68|VA68|VPP2|Vma1	ATPase H+ transporting V1 subunit A	protein-coding	27.32
chr16-55	chr16	13436685	13436953	Intergenic	Intergenic	-483338	NM_005236	2072	Hs.567265	NM_005236	ENSG00000175595	ERCC4	ERCC11|FANCQ|RAD1|XFEPS|XPF	ERCC excision repair 4, endonuclease catalytic subunit	protein-coding	27.31
chr17-50	chr17	7035677	7035946	Promoter	promoter-TSS (NM_201566)	-264	NM_201566	201232	Hs.448010	NM_201566	ENSG00000174327	SLC16A13	MCT13	solute carrier family 16 member 13	protein-coding	27.29
chr11-20	chr11	119101949	119102213	Promoter	promoter-TSS (NM_001382)	-6	NM_001382	1798	Hs.524081	NM_001382	ENSG00000172269	DPAGT1	ALG7|CDG-Ij|CDG1J|CMS13|CMSTA2|D11S366|DGPT|DPAGT|DPAGT2|G1PT|GPT|UAGT|UGAT	dolichyl-phosphate N-acetylglucosaminephosphotransferase 1	protein-coding	27.29
chr8-16	chr8	71838530	71838799	Intergenic	Intergenic	-4459	NR_033652	100132891	Hs.137674	NR_033651	ENSG00000235531	MSC-AS1	-	MSC antisense RNA 1	ncRNA	27.29
chr17-120	chr17	82039061	82039328	Promoter	LTR13A|LTR|ERVK	-1497	NM_001195218	51181	Hs.9857	NM_016286	ENSG00000169738	DCXR	DCR|HCR2|HCRII|KIDCR|P34H|PNTSU|SDR20C1|XR	dicarbonyl and L-xylulose reductase	protein-coding	27.2
chr22-14	chr22	37161504	37161769	Genebody	intron (NM_001346222, intron 1 of 9)	-11646	NM_000878	3560	Hs.474787	NM_000878	ENSG00000100385	IL2RB	CD122|IL15RB|P70-75	interleukin 2 receptor subunit beta	protein-coding	27.16
chr8-14	chr8	22443710	22443979	Genebody	intron (NM_001243975, intron 1 of 12)	2874	NM_005605	5533	Hs.731683	NM_005605	ENSG00000120910	PPP3CC	CALNA3|CNA3|PP2Bgamma	protein phosphatase 3 catalytic subunit gamma	protein-coding	27.15
chr12-28	chr12	30851510	30851752	Intergenic	LTR13_|LTR|ERVK	55950	NR_040245	100287314	Hs.355210	NR_040245	ENSG00000235884	LINC00941	lncRNA-MUF	long intergenic non-protein coding RNA 941	ncRNA	27.14
chr5-24	chr5	95554868	95555137	Promoter	promoter-TSS (NM_014639)	3	NM_014639	9652	Hs.482868	NM_014639	ENSG00000198677	TTC37	KIAA0372|Ski3|THES	tetratricopeptide repeat domain 37	protein-coding	27.13
chr11-19	chr11	95790942	95791211	Promoter	intron (NM_014679, intron 1 of 10)	615	NM_001243777	9702	Hs.101014	NM_014679	ENSG00000166037	CEP57	MVA2|PIG8|TSP57	centrosomal protein 57	protein-coding	27.05
chr3-29	chr3	141370259	141370528	Genebody	MLT1J1|LTR|ERVL-MaLR	-16053	NM_001350099	253461	Hs.518301	NM_152535	ENSG00000177311	ZBTB38	CIBZ|PPP1R171|ZNF921	zinc finger and BTB domain containing 38	protein-coding	27.05
chr19-40	chr19	18374351	18374620	Intergenic	Intergenic	-11475	NM_004864	9518	Hs.616962	NM_004864	ENSG00000130513	GDF15	GDF-15|MIC-1|MIC1|NAG-1|PDF|PLAB|PTGFB	growth differentiation factor 15	protein-coding	27.05
chr16-83	chr16	29645722	29645985	Intergenic	MLT1J2|LTR|ERVL-MaLR	-17097	NM_001030288	6693	Hs.632188	NM_003123	ENSG00000197471	SPN	CD43|GALGP|GPL115|LSN	sialophorin	protein-coding	27.03
chr1-115	chr1	37554251	37554511	Promoter	promoter-TSS (NM_024700)	-37	NM_024700	79753	Hs.47232	NM_024700	ENSG00000163877	SNIP1	PML1|PMRED	Smad nuclear interacting protein 1	protein-coding	27.01
chrX-11	chrX	16786220	16786489	Promoter	promoter-TSS (NM_018360)	-78	NM_018360	55787	Hs.555961	NM_018360	ENSG00000086712	TXLNG	CXorf15|ELRG|FIAT|LSR5|TXLNGX	taxilin gamma	protein-coding	26.99
chr13-6	chr13	49445102	49445371	Promoter	MIR|SINE|MIR	943	NM_001320699	83852	Hs.631789	NM_031915	ENSG00000136169	SETDB2	C13orf4|CLLD8|CLLL8|KMT1F	SET domain bifurcated 2	protein-coding	26.99
chr6-16	chr6	24522494	24522759	Genebody	intron (NM_001080, intron 6 of 9)	27657	NM_001080	7915	Hs.371723	NM_001080	ENSG00000112294	ALDH5A1	SSADH|SSDH	aldehyde dehydrogenase 5 family member A1	protein-coding	26.94
chr17-60	chr17	59786486	59786755	Genebody	intron (NM_001329398, intron 6 of 11)	-54646	NR_029493	406991	Hs.444569	NR_029493	ENSG00000284190	MIR21	MIRN21|hsa-mir-21|miR-21|miRNA21	microRNA 21	ncRNA	26.94
chr15-14	chr15	68229971	68230240	Promoter	promoter-TSS (NM_017882)	-363	NM_017882	54982	Hs.584921	NM_017882	ENSG00000128973	CLN6	CLN4A|HsT18960|nclf	CLN6, transmembrane ER protein	protein-coding	26.94
chr8-10	chr8	58595999	58596266	Genebody	intron (NM_001144772, intron 21 of 30)	42963	NM_001007070	6386	Hs.200804	NM_005625	ENSG00000137575	SDCBP	MDA-9|MDA9|ST1|SYCL|TACIP18	syndecan binding protein	protein-coding	26.87
chr19-52	chr19	48875052	48875321	Genebody	AluSz6|SINE|Alu	2794	NM_014330	23645	Hs.631593	NM_014330	ENSG00000087074	PPP1R15A	GADD34	protein phosphatase 1 regulatory subunit 15A	protein-coding	26.86
chr4-96	chr4	176052830	176053099	Intergenic	Intergenic	-12870	NM_170710	116966	Hs.532056	NM_170710	ENSG00000150627	WDR17	-	WD repeat domain 17	protein-coding	26.81
chr18-6	chr18	63161822	63162091	Genebody	intron (NM_000633, intron 2 of 2)	157424	NM_000633	596	Hs.150749	NM_000633	ENSG00000171791	BCL2	Bcl-2|PPP1R50	BCL2, apoptosis regulator	protein-coding	26.78
chr15-20	chr15	34318659	34318925	Promoter	promoter-TSS (NM_005135)	28	NM_005135	9990	Hs.510939	NM_005135	ENSG00000140199	SLC12A6	ACCPN|KCC3|KCC3A|KCC3B	solute carrier family 12 member 6	protein-coding	26.73
chr6-21	chr6	111259177	111259446	Promoter	promoter-TSS (NM_153369)	32	NM_153369	91749	Hs.400572	NM_153369	ENSG00000173214	MFSD4B	KIAA1919|NaGLT1	major facilitator superfamily domain containing 4B	protein-coding	26.7
chr16-57	chr16	81007445	81007714	Promoter	promoter-TSS (NM_001351970)	-660	NR_147839	56942	Hs.55028	NM_020188	ENSG00000103121	CMC2	2310061C15Rik|C16orf61|DC13	C-X9-C motif containing 2	protein-coding	26.67
chr17-41	chr17	7572382	7572651	Promoter	promoter-TSS (NM_001204510)	-190	NM_001204510	1973	Hs.129673	NM_001416	ENSG00000161960	EIF4A1	DDX2A|EIF-4A|EIF4A|eIF-4A-I|eIF4A-I	eukaryotic translation initiation factor 4A1	protein-coding	26.64
chr1-92	chr1	149899369	149899638	Promoter	promoter-TSS (NM_001321026)	-79	NM_001321026	51027	Hs.13880	NM_016074	ENSG00000178096	BOLA1	CGI-143	bolA family member 1	protein-coding	26.46
chr4-20	chr4	40576996	40577265	Genebody	intron (NM_001098634, intron 1 of 6)	52736	NM_001098634	54502	Hs.518727	NM_019027	ENSG00000163694	RBM47	NET18	RNA binding motif protein 47	protein-coding	26.46
chr16-54	chr16	15643442	15643711	Promoter	promoter-TSS (NM_001184998).2	282	NR_030159	619553		NR_030159	ENSG00000283736	MIR484	MIRN484|hsa-mir-484|mir-484	microRNA 484	ncRNA	26.43
chr22-17	chr22	31676668	31676935	Intergenic	Intergenic	-14237	NM_001326420	23761	Hs.420559	NM_014338	ENSG00000241878	PISD	DJ858B16|PSD|PSDC|PSSC|dJ858B16.2	phosphatidylserine decarboxylase	protein-coding	26.41
chr2-19	chr2	177395650	177395917	Genebody	intron (NM_003659, intron 1 of 19)	3040	NM_003659	8540	Hs.516543	NM_003659	ENSG00000018510	AGPS	ADAP-S|ADAS|ADHAPS|ADPS|ALDHPSY|RCDP3	alkylglycerone phosphate synthase	protein-coding	26.28
chr16-50	chr16	1991132	1991401	Promoter	CpG	1321	NM_004209	9143	Hs.435277	NM_004209	ENSG00000127561	SYNGR3	-	synaptogyrin 3	protein-coding	26.24
chr19-58	chr19	11988537	11988805	Promoter	LTR13_|LTR|ERVK	1054	NR_134929	101928464	Hs.631643	NR_134927	ENSG00000219665	ZNF433-AS1	-	ZNF433 and ZNF878 antisense RNA 1	ncRNA	26.23
chr5-36	chr5	180806610	180806879	Genebody	MIRc|SINE|MIR	-2842	NM_001114619	4245	Hs.519818	NM_002406	ENSG00000131446	MGAT1	GLCNAC-TI|GLCT1|GLYT1|GNT-1|GNT-I|GnTI|MGAT	mannosyl (alpha-1,3-)-glycoprotein beta-1,2-N-acetylglucosaminyltransferase	protein-coding	26.08
chr15-18	chr15	67840190	67840459	Promoter	promoter-TSS (NR_104088).5	-279	NR_125730	103625684		NR_125730	ENSG00000207357	RNU6-2	U6-2	RNA, U6 small nuclear 2	snRNA	26.08
chr10-31	chr10	95755557	95755826	Promoter	promoter-TSS (NM_001164183)	39	NM_001164178	953	Hs.576612	NM_001776	ENSG00000138185	ENTPD1	ATPDase|CD39|NTPDase-1|SPG64	ectonucleoside triphosphate diphosphohydrolase 1	protein-coding	26.05
chr6-67	chr6	14372800	14373069	Intergenic	MIR3|SINE|MIR	-87480	NR_108096	102216342	Hs.563409	NR_108096	ENSG00000226673	LINC01108	LncRNA-ES1	long intergenic non-protein coding RNA 1108	ncRNA	26.03
chr19-53	chr19	12938204	12938473	Promoter	promoter-TSS (NM_004343)	-262	NM_004343	811	Hs.515162	NM_004343	ENSG00000179218	CALR	CRT|HEL-S-99n|RO|SSA|cC1qR	calreticulin	protein-coding	26.03
chr1-93	chr1	45491206	45491468	Promoter	promoter-TSS (NM_007170)	-169	NM_007170	10420	Hs.591499	NM_007170	ENSG00000070759	TESK2	-	testis associated actin remodelling kinase 2	protein-coding	26.01
chr4-29	chr4	75514284	75514545	Promoter	promoter-TSS (NM_001278537)	16	NR_037914	25898	Hs.48297	NM_015436	ENSG00000163743	RCHY1	ARNIP|CHIMP|PIRH2|PRO1996|RNF199|ZCHY|ZNF363	ring finger and CHY zinc finger domain containing 1	protein-coding	25.97
chr2-16	chr2	85861194	85861463	Genebody	intron (NM_001042437, intron 2 of 6)	6342	NM_001042437	8869	Hs.415117	NM_003896	ENSG00000115525	ST3GAL5	SATI|SIAT9|SIATGM3S|SPDRS|ST3Gal V|ST3GalV	ST3 beta-galactoside alpha-2,3-sialyltransferase 5	protein-coding	25.92
chr8-15	chr8	125579511	125579775	Intergenic	Intergenic	147434	NM_001282985	10221	Hs.444947	NM_025195	ENSG00000173334	TRIB1	C8FW|GIG-2|GIG2|SKIP1|TRB-1|TRB1	tribbles pseudokinase 1	protein-coding	25.86
chr2-13	chr2	25273377	25273640	Genebody	intron (NM_022552, intron 6 of 22)	-21193	NM_153759	1788	Hs.515840	NM_022552	ENSG00000119772	DNMT3A	DNMT3A2|M.HsaIIIA|TBRS	DNA methyltransferase 3 alpha	protein-coding	25.83
chr10-27	chr10	75402325	75402591	Promoter	promoter-TSS (NR_120651)	-439	NR_110301	100131213	Hs.534598	NR_024421	ENSG00000237149	ZNF503-AS2	C10orf41|NCRNA00245	ZNF503 antisense RNA 2	ncRNA	25.81
chr1-103	chr1	154627930	154628199	Promoter	promoter-TSS (NM_001025107)	-84	NM_001025107	103	Hs.12341	NM_001111	ENSG00000160710	ADAR	ADAR1|AGS6|DRADA|DSH|DSRAD|G1P1|IFI-4|IFI4|K88DSRBP|P136	adenosine deaminase, RNA specific	protein-coding	25.79
chr12-24	chr12	116738103	116738368	Promoter	promoter-TSS (NM_032814)	-56	NM_032814	84900	Hs.437195	NM_032814	ENSG00000135119	RNFT2	TMEM118	ring finger protein, transmembrane 2	protein-coding	25.74
chr9-27	chr9	20640686	20640941	Intergenic	MLT1L|LTR|ERVL-MaLR	-17496	NM_017794	54914	Hs.136247	NM_017794	ENSG00000188352	FOCAD	KIAA1797	focadhesin	protein-coding	25.73
chr18-7	chr18	31942993	31943262	Promoter	promoter-TSS (NM_014939)	1	NM_014939	22878	Hs.202001	NM_014939	ENSG00000153339	TRAPPC8	GSG1|HsT2706|KIAA1012|TRS85	trafficking protein particle complex 8	protein-coding	25.71
chr14-26	chr14	24161073	24161342	Promoter	promoter-TSS (NM_006084)	-6	NM_006084	10379	Hs.1706	NM_006084	ENSG00000213928	IRF9	IRF-9|ISGF3|ISGF3G|p48	interferon regulatory factor 9	protein-coding	25.6
chr6-27	chr6	99425282	99425551	Promoter	promoter-TSS (NM_001322417)	-71	NM_001322419	25957	Hs.520287	NM_015491	ENSG00000132424	PNISR	C6orf111|HSPC306|SFRS18|SRrp130|bA98I9.2	PNN interacting serine and arginine rich protein	protein-coding	25.6
chrX-10	chrX	13652953	13653221	Promoter	promoter-TSS (NM_152634)	-19	NM_001297564	170082	Hs.222855	NM_152634	ENSG00000176896	TCEANC	-	transcription elongation factor A N-terminal and central domain containing	protein-coding	25.59
chr11-26	chr11	61733407	61733676	Genebody	intron (NM_006133, intron 9 of 19)	-19096	NM_001127392	745	Hs.473109	NM_013279	ENSG00000124920	MYRF	C11orf9|MRF|Ndt80|pqn-47	myelin regulatory factor	protein-coding	25.54
chr2-42	chr2	118197372	118197641	Intergenic	MLT1J|LTR|ERVL-MaLR	-11120	NR_144530	100506797	Hs.116176	NR_144530	ENSG00000226856	LOC100506797	-	uncharacterized LOC100506797	ncRNA	25.52
chrX-12	chrX	53714865	53715130	Intergenic	Intergenic	-28268	NM_031407	10075	Hs.136905	NM_031407	ENSG00000086758	HUWE1	ARF-BP1|HECTH9|HSPC272|Ib772|LASU1|MULE|URE-B1|UREB1	HECT, UBA and WWE domain containing 1, E3 ubiquitin protein ligase	protein-coding	25.52
chr19-50	chr19	49487283	49487552	Promoter	promoter-TSS (NM_012423)	-137	NR_073024	23521	Hs.523185	NM_012423	ENSG00000142541	RPL13A	L13A|TSTA1	ribosomal protein L13a	protein-coding	25.46
chr20-35	chr20	39342495	39342762	Intergenic	Intergenic	-117880	NR_027124	339568	Hs.434319	NR_027124	ENSG00000230324	LINC01734	-	long intergenic non-protein coding RNA 1734	ncRNA	25.44
chr16-58	chr16	11363421	11363690	Intergenic	Intergenic	18117	NM_152308	116028	Hs.347524	NM_152308	ENSG00000175643	RMI2	BLAP18|C16orf75	RecQ mediated genome instability 2	protein-coding	25.36
chr9-40	chr9	96417264	96417517	Promoter	CpG	997	NM_153695	195828	Hs.494557	NM_153695	ENSG00000165244	ZNF367	AFF29|CDC14B|ZFF29	zinc finger protein 367	protein-coding	25.33
chr11-25	chr11	7987112	7987381	Promoter	promoter-TSS (NM_003754)	-74	NM_003754	8665	Hs.516023	NM_003754	ENSG00000175390	EIF3F	EIF3S5|eIF3-p47	eukaryotic translation initiation factor 3 subunit F	protein-coding	25.33
chr21-24	chr21	33215683	33215951	Intergenic	Intergenic	-14078	NM_001289128	3455	Hs.708195	NM_000874	ENSG00000159110	IFNAR2	IFN-R|IFN-alpha-REC|IFNABR|IFNARB|IMD45	interferon alpha and beta receptor subunit 2	protein-coding	25.29
chr16-49	chr16	89566110	89566379	Genebody	3' UTR (NM_033251, exon 5 of 5)	4814	NR_002450	606500		NR_002450		SNORD68	HBII-202	small nucleolar RNA, C/D box 68	snoRNA	25.28
chr10-28	chr10	87862110	87862366	Promoter	exon (NM_001126049, exon 1 of 1)	1199	NM_001126049	100144748	Hs.559820	NM_001126049	ENSG00000227268	KLLN	CWS4|KILLIN	killin, p53 regulated DNA replication inhibitor	protein-coding	25.23
chr12-27	chr12	31807676	31807945	Intergenic	MLT1J|LTR|ERVL-MaLR	-15569	NM_001013699	440093	Hs.448697	NM_001013699	ENSG00000188375	H3F3C	H3.5	H3 histone family member 3C	protein-coding	25.22
chr15-22	chr15	45705632	45705898	Promoter	MIRb|SINE|MIR	570	NR_135680	105370802	Hs.447522	NR_135680	ENSG00000259200	LOC105370802	-	uncharacterized LOC105370802	ncRNA	25.18
chr19-35	chr19	48835830	48836099	Promoter	intron (NM_016246, intron 1 of 8)	713	NM_016246	51171	Hs.18788	NM_016246	ENSG00000087076	HSD17B14	DHRS10|SDR47C1|retSDR3	hydroxysteroid 17-beta dehydrogenase 14	protein-coding	25.17
chr12-30	chr12	6953879	6954148	Genebody	intron (NM_002831, intron 3 of 15)	2742	NM_002831	5777	Hs.63489	NM_002831	ENSG00000111679	PTPN6	HCP|HCPH|HPTP1C|PTP-1C|SH-PTP1|SHP-1|SHP-1L|SHP1	protein tyrosine phosphatase, non-receptor type 6	protein-coding	25.14
chr17-61	chr17	79728616	79728885	Intergenic	MLT1J|LTR|ERVL-MaLR	-2353	NM_178543	339221	Hs.114084	NM_178543	ENSG00000182156	ENPP7	ALK-SMase|E-NPP 7|NPP-7|NPP7	ectonucleotide pyrophosphatase/phosphodiesterase 7	protein-coding	25.14
chr10-35	chr10	95783679	95783943	Genebody	intron (NR_038444, intron 5 of 5)	27895	NM_001164182	953	Hs.576612	NM_001776	ENSG00000138185	ENTPD1	ATPDase|CD39|NTPDase-1|SPG64	ectonucleoside triphosphate diphosphohydrolase 1	protein-coding	25.13
chr3-42	chr3	16841926	16842178	Intergenic	Intergenic	-42907	NM_001144382	23228	Hs.202010	NM_015184	ENSG00000154822	PLCL2	PLCE2	phospholipase C like 2	protein-coding	25.12
chr19-65	chr19	1479119	1479388	Promoter	promoter-TSS (NM_152482)	-24	NM_152482	148223	Hs.532840	NM_152482	ENSG00000119559	C19orf25	-	chromosome 19 open reading frame 25	protein-coding	25.12
chr4-33	chr4	44678252	44678479	Promoter	promoter-TSS (NM_021927)	-30	NM_001345867	60558	Hs.546419	NM_021927	ENSG00000151806	GUF1	EF-4|EF4|EIEE40	GUF1 homolog, GTPase	protein-coding	25.09
chr17-66	chr17	32349943	32350211	Promoter	promoter-TSS (NM_003457)	-32	NR_030362	693217		NR_030362	ENSG00000283774	MIR632	MIRN632|hsa-mir-632	microRNA 632	ncRNA	25.07
chr19-81	chr19	48780796	48781065	Intergenic	LTR13A|LTR|ERVK	25371	NM_019113	26291	Hs.283015	NM_019113	ENSG00000105550	FGF21	-	fibroblast growth factor 21	protein-coding	25.06
chr2-28	chr2	201158152	201158421	Promoter	promoter-TSS (NR_040030)	-494	NR_040030	65072	Hs.664613	NR_040030	ENSG00000226312	CFLAR-AS1	ALS2CR10	CFLAR antisense RNA 1	ncRNA	25.06
chr12-33	chr12	57591104	57591373	Promoter	promoter-TSS (NM_024779)	79	NM_001146258	79837	Hs.745011	NM_024779	ENSG00000166908	PIP4K2C	PIP5K2C	phosphatidylinositol-5-phosphate 4-kinase type 2 gamma	protein-coding	25.01
chr17-55	chr17	40113244	40113513	Intergenic	Intergenic	-9159	NM_001012241	339287	Hs.532786	NM_001012241	ENSG00000188895	MSL1	MSL-1|hMSL1	male specific lethal 1 homolog	protein-coding	24.98
chr21-32	chr21	6312112	6312379	Intergenic	Intergenic	-44909	NM_001322047	102724843	Hs.743984	NM_001322047		LOC102724843	-	uncharacterized LOC102724843	protein-coding	24.95
chr21-39	chr21	37366488	37366757	Promoter	promoter-TSS (NM_101395)	-312	NM_001347721	1859	Hs.368240	NM_001396	ENSG00000157540	DYRK1A	DYRK|DYRK1|HP86|MNB|MNBH|MRD7	dual specificity tyrosine phosphorylation regulated kinase 1A	protein-coding	24.95
chr4-32	chr4	139266767	139267036	Genebody	exon (NM_032623, exon 4 of 4)	13437	NM_032623	84709	Hs.710036	NM_032623	ENSG00000137463	MGARP	C4orf49|CESP-1|HUMMR|OSAP	mitochondria localized glutamic acid rich protein	protein-coding	24.93
chr16-72	chr16	14672725	14672977	Genebody	intron (NM_003561, intron 3 of 3)	21722	NM_003561	8399	Hs.567366	NM_003561	ENSG00000069764	PLA2G10	GXPLA2|GXSPLA2|SPLA2|sPLA2-X	phospholipase A2 group X	protein-coding	24.89
chr8-11	chr8	8753063	8753332	Intergenic	Intergenic	51041	NM_194284	137075	Hs.183617	NM_194284	ENSG00000253958	CLDN23	CLDNL|hCG1646163	claudin 23	protein-coding	24.85
chr7-26	chr7	92424612	92424879	Genebody	L4_A_Mam|LINE|RTE-X	12569	NR_145992	105375396		NM_001317905	ENSG00000230927	TMBIM7P	-	transmembrane BAX inhibitor motif containing 7, pseudogene	pseudo	24.82
chr12-41	chr12	110677244	110677513	Genebody	L2c|LINE|L2	11779	NM_032369	84329	Hs.211511	NM_032369	ENSG00000122986	HVCN1	HV1|VSOP	hydrogen voltage gated channel 1	protein-coding	24.69
chr8-12	chr8	11897349	11897618	Intergenic	Intergenic	-29333	NM_147781	1508	Hs.520898	NM_001908	ENSG00000164733	CTSB	APPS|CPSB	cathepsin B	protein-coding	24.69
chr10-70	chr10	68172466	68172735	Genebody	intron (NR_045663, intron 9 of 17)	59513	NM_145178	220202	Hs.175396	NM_145178	ENSG00000179774	ATOH7	Math5|NCRNA|PHPVAR|RNANC|bHLHa13	atonal bHLH transcription factor 7	protein-coding	24.69
chr2-11	chr2	231463639	231463901	Promoter	CpG	724	NM_005381	4691	Hs.79110	NM_005381	ENSG00000115053	NCL	C23|Nsr1	nucleolin	protein-coding	24.63
chr1-98	chr1	150321329	150321590	Promoter	promoter-TSS (NR_146766)	-9	NR_146767	9129	Hs.11776	NM_004698	ENSG00000117360	PRPF3	HPRP3|HPRP3P|PRP3|Prp3p|RP18|SNRNP90	pre-mRNA processing factor 3	protein-coding	24.61
chr20-15	chr20	18567097	18567366	Promoter	promoter-TSS (NM_001348957)	-189	NM_001348957	388789	Hs.349092	NM_001348957	ENSG00000232388	SMIM26	LINC00493	small integral membrane protein 26	protein-coding	24.55
chr7-21	chr7	100217578	100217847	Promoter	LTR13|LTR|ERVK	-1536	NM_024070	79037	Hs.729356	NM_024070	ENSG00000213413	PVRIG	C7orf15|CD112R	PVR related immunoglobulin domain containing	protein-coding	24.5
chr19-43	chr19	33521615	33521884	Promoter	exon (NM_000285, exon 1 of 15)	144	NM_001166057	5184	Hs.36473	NM_000285	ENSG00000124299	PEPD	PROLIDASE	peptidase D	protein-coding	24.44
chr12-23	chr12	8949621	8949884	Promoter	promoter-TSS (NM_001329103)	9	NM_001207024	4074	Hs.134084	NM_002355	ENSG00000003056	M6PR	CD-M6PR|CD-MPR|MPR 46|MPR-46|MPR46|SMPR	mannose-6-phosphate receptor, cation dependent	protein-coding	24.4
chr2-22	chr2	37561638	37561907	Intergenic	MLT1I|LTR|ERVL-MaLR	110427	NM_001270437	10602	Hs.369574	NM_006449	ENSG00000163171	CDC42EP3	BORG2|CEP3|UB1	CDC42 effector protein 3	protein-coding	24.39
chr7-23	chr7	20287268	20287527	Intergenic	Intergenic	-9311	NR_110117	101927769	Hs.256080	NR_110117	ENSG00000226097	LOC101927769	-	uncharacterized LOC101927769	ncRNA	24.38
chr14-23	chr14	31264511	31264768	Intergenic	Intergenic	-57116	NM_015382	25831	Hs.708017	NM_015382	ENSG00000092148	HECTD1	EULIR	HECT domain E3 ubiquitin protein ligase 1	protein-coding	24.38
chr10-33	chr10	112530940	112531207	Genebody	(CA)n|Simple_repeat|Simple_repeat	-83527	NM_001351082	64429	Hs.196990	NM_022494	ENSG00000023041	ZDHHC6	DHHC-6|ZNF376	zinc finger DHHC-type containing 6	protein-coding	24.38
chr9-24	chr9	122265369	122265635	Promoter	promoter-TSS (NM_033117)	-638	NR_027126	92400	Hs.415842	NM_033117	ENSG00000119446	RBM18	-	RNA binding motif protein 18	protein-coding	24.37
chr19-42	chr19	3500621	3500880	Promoter	promoter-TSS (NM_031304)	-127	NM_031304	83475	Hs.515064	NM_031304	ENSG00000129932	DOHH	HLRC1|hDOHH	deoxyhypusine hydroxylase	protein-coding	24.36
chr12-36	chr12	92485471	92485733	Intergenic	Intergenic	18923	NR_144532	100507616	Hs.339918	NR_144532		LINC02397	-	long intergenic non-protein coding RNA 2397	ncRNA	24.27
chr2-64	chr2	148020691	148020960	Promoter	promoter-TSS (NM_018328)	-64	NM_001190881	5000	Hs.558364	NM_002552	ENSG00000115947	ORC4	ORC4L|ORC4P	origin recognition complex subunit 4	protein-coding	24.26
chr1-104	chr1	41728875	41729138	Genebody	intron (NM_024503, intron 1 of 8)	189701	NM_001127714	59269	Hs.403972	NM_024503	ENSG00000127124	HIVEP3	KBP-1|KBP1|KRC|SHN3|Schnurri-3|ZAS3|ZNF40C	human immunodeficiency virus type I enhancer binding protein 3	protein-coding	24.18
chr9-29	chr9	87536224	87536492	Genebody	intron (NM_001288730, intron 2 of 25)	-17096	NR_146781	100506897	Hs.656160	NR_146781	ENSG00000236709	DAPK1-IT1	-	DAPK1 intronic transcript 1	ncRNA	24.16
chr5-51	chr5	73496932	73497201	Promoter	Intergenic	-1359	NM_001207	689	Hs.591768	NM_001207	ENSG00000145741	BTF3	BETA-NAC|BTF3a|BTF3b|NACB	basic transcription factor 3	protein-coding	24.12
chr17-56	chr17	38853681	38853948	Promoter	promoter-TSS (NR_002576)	-14	NM_000978	9349	Hs.406300	NM_000978	ENSG00000125691	RPL23	L23|rpL17	ribosomal protein L23	protein-coding	24.09
chr5-32	chr5	177510310	177510579	Promoter	promoter-TSS (NM_001144876)	-18	NM_001144876	79930	Hs.720849	NM_024872	ENSG00000146094	DOK3	DOKL	docking protein 3	protein-coding	24.07
chr1-130	chr1	221739700	221739969	Genebody	intron (NM_007207, intron 1 of 3)	2342	NR_111940	11221	Hs.497822	NM_007207	ENSG00000143507	DUSP10	MKP-5|MKP5	dual specificity phosphatase 10	protein-coding	24.04
chr17-48	chr17	60677329	60677598	Promoter	promoter-TSS (NM_001353144)	-312	NM_001353145	54828	Hs.655028	NM_017679	ENSG00000141376	BCAS3	GAOB1|MAAB	BCAS3, microtubule associated cell migration factor	protein-coding	24.04
chr15-24	chr15	74598274	74598539	Genebody	TTS (NM_001307939)	-9966	NM_003992	1198	Hs.511790	NM_001292	ENSG00000179335	CLK3	PHCLK3|PHCLK3/152	CDC like kinase 3	protein-coding	24
chr20-39	chr20	48359796	48360046	Promoter	promoter-TSS (NR_026958)	10	NR_026958	284749	Hs.299080	NR_026958	ENSG00000235621	LINC00494	-	long intergenic non-protein coding RNA 494	ncRNA	23.99
chr13-12	chr13	30371647	30371916	Genebody	intron (NR_024464, intron 2 of 4)	2133	NR_024464	100188949	Hs.439791	NR_024464	ENSG00000238121	LINC00426	-	long intergenic non-protein coding RNA 426	ncRNA	23.99
chr16-61	chr16	50696669	50696938	Promoter	promoter-TSS (NM_022162)	-336	NM_022162	64127	Hs.592072	NM_022162	ENSG00000167207	NOD2	ACUG|BLAU|BLAUS|CARD15|CD|CLR16.3|IBD1|NLRC2|NOD2B|PSORAS1|YAOS	nucleotide binding oligomerization domain containing 2	protein-coding	23.93
chrX-21	chrX	147911719	147911988	Promoter	promoter-TSS (NM_001185076)	-36	NR_024503	100126270	Hs.561999	NR_024499	ENSG00000268066	FMR1-AS1	ASFMR1|FMR1-AS|FMR1AS|FMR4	FMR1 antisense RNA 1	ncRNA	23.91
chr19-54	chr19	10879190	10879442	Genebody	MLT1J|LTR|ERVL-MaLR	7739	NM_199141	10498	Hs.323213	NM_199141	ENSG00000142453	CARM1	PRMT4	coactivator associated arginine methyltransferase 1	protein-coding	23.86
chr1-77	chr1	153962073	153962341	Promoter	TTS (NR_106795)	213	NR_106795	102465441		NR_106795	ENSG00000276584	MIR6737	hsa-mir-6737	microRNA 6737	ncRNA	23.86
chr20-16	chr20	18793894	18794152	Promoter	promoter-TSS (NR_026884)	-26	NR_026885	100270804	Hs.598768	NR_026885		LOC100270804	-	uncharacterized LOC100270804	ncRNA	23.84
chr4-18	chr4	48203436	48203705	Genebody	intron (NM_003215, intron 2 of 17)	66227	NM_003215	7006	Hs.479670	NM_003215	ENSG00000135605	TEC	PSCTK4	tec protein tyrosine kinase	protein-coding	23.83
chr6-29	chr6	150005215	150005472	Promoter	promoter-TSS (NR_024045)	-199	NR_024045	646024	Hs.560537	NR_024045	ENSG00000218358	RAET1K	-	retinoic acid early transcript 1K pseudogene	pseudo	23.82
chr3-33	chr3	183099515	183099784	Promoter	promoter-TSS (NM_001293273)	-62	NR_120639	56922	Hs.47649	NM_020166	ENSG00000078070	MCCC1	MCC-B|MCCA	methylcrotonoyl-CoA carboxylase 1	protein-coding	23.77
chr9-38	chr9	136766909	136767178	Intergenic	LTR13|LTR|ERVK	-2530	NM_203347	389812	Hs.413902	NM_203347	ENSG00000177984	LCN15	PRO6093|UNQ2541	lipocalin 15	protein-coding	23.75
chr15-13	chr15	67101094	67101363	Genebody	intron (NM_005902, intron 1 of 8)	-24488	NM_001145102	4088	Hs.727986	NM_005902	ENSG00000166949	SMAD3	HSPC193|HsT17436|JV15-2|LDS1C|LDS3|MADH3	SMAD family member 3	protein-coding	23.75
chr14-20	chr14	101876625	101876894	Genebody	intron (NM_178586, intron 2 of 12)	66896	NM_001352912	5527	Hs.368264	NM_002719	ENSG00000078304	PPP2R5C	B56G|B56gamma|PR61G	protein phosphatase 2 regulatory subunit B'gamma	protein-coding	23.72
chr2-29	chr2	6345608	6345877	Intergenic	Intergenic	29680	NR_110251	101929390	Hs.434407	NR_110251	ENSG00000227007	LINC01247	-	long intergenic non-protein coding RNA 1247	ncRNA	23.67
chr14-36	chr14	20680018	20680287	Intergenic	MLT1N2|LTR|ERVL-MaLR	-4025	NM_001145	283	Hs.283749	NM_001145	ENSG00000214274	ANG	ALS9|HEL168|RAA1|RNASE4|RNASE5	angiogenin	protein-coding	23.64
chr8-13	chr8	55930544	55930813	Genebody	intron (NM_001111097, intron 1 of 12)	-27823	NR_145767	109617001		NR_145767	ENSG00000199405	SNORA1B	-	small nucleolar RNA, H/ACA box 1B	snoRNA	23.61
chr2-26	chr2	46500169	46500434	Intergenic	Intergenic	20736	NM_001145051	388946	Hs.733348	NM_001145051	ENSG00000284701	TMEM247	-	transmembrane protein 247	protein-coding	23.59
chr2-25	chr2	135984781	135985039	Promoter	promoter-TSS (NR_110200)	-266	NR_110200	101928243	Hs.602178	NR_110199	ENSG00000231890	DARS-AS1	-	DARS antisense RNA 1	ncRNA	23.56
chr7-20	chr7	44460399	44460668	Genebody	intron (NM_015332, intron 2 of 5)	30253	NM_015332	23386	Hs.488171	NM_015332	ENSG00000015676	NUDCD3	NudCL	NudC domain containing 3	protein-coding	23.56
chr5-33	chr5	172983639	172983908	Promoter	promoter-TSS (NM_003945)	13	NM_003945	8992	Hs.484188	NM_003945	ENSG00000113732	ATP6V0E1	ATP6H|ATP6V0E|M9.2|Vma21|Vma21p	ATPase H+ transporting V0 subunit e1	protein-coding	23.56
chr6-26	chr6	7313235	7313500	Promoter	promoter-TSS (NM_003144)	-53	NR_120448	6745	Hs.114033	NM_003144	ENSG00000124783	SSR1	TRAPA	signal sequence receptor subunit 1	protein-coding	23.53
chr1-135	chr1	68497022	68497291	Promoter	promoter-TSS (NM_017779)	65	NM_017779	55635	Hs.445098	NM_017779	ENSG00000024526	DEPDC1	DEP.8|DEPDC1-V2|DEPDC1A|SDP35	DEP domain containing 1	protein-coding	23.42
chr1-152	chr1	64019898	64020165	Genebody	MLT1C|LTR|ERVL-MaLR	92174	NR_110666	101927034	Hs.680824	NR_110665	ENSG00000223949	ROR1-AS1	-	ROR1 antisense RNA 1	ncRNA	23.41
chr15-26	chr15	52679277	52679546	Promoter	promoter-TSS (NM_019600)	-777	NM_019600	56204	Hs.152385	NM_019600	ENSG00000047346	FAM214A	KIAA1370	family with sequence similarity 214 member A	protein-coding	23.37
chr7-29	chr7	1422882	1423144	Intergenic	Intergenic	36460	NM_182924	79778	Hs.376617	NM_024723	ENSG00000164877	MICALL2	JRAB|MICAL-L2	MICAL like 2	protein-coding	23.36
chr1-150	chr1	44631767	44632024	Genebody	CpG	39161	NR_145816	109623472		NR_145816		SNORD145	-	small nucleolar RNA, C/D box 145	snoRNA	23.28
chr2-80	chr2	129877384	129877644	Promoter	promoter-TSS (NR_149127)	-23	NR_149127	105373615		NR_149127		LINC02572	-	long intergenic non-protein coding RNA 2572	ncRNA	23.24
chr1-119	chr1	50960233	50960502	Promoter	promoter-TSS (NM_007051)	-103	NM_007051	11124	Hs.530402	NM_007051	ENSG00000185104	FAF1	CGI-03|HFAF1s|UBXD12|UBXN3A|hFAF1	Fas associated factor 1	protein-coding	23.18
chr11-27	chr11	59616085	59616354	Promoter	promoter-TSS (NM_002556)	-75	NM_002556	5007	Hs.597091	NM_002556	ENSG00000110048	OSBP	OSBP1	oxysterol binding protein	protein-coding	23.16
chr3-43	chr3	184812047	184812316	Promoter	promoter-TSS (NM_001349297)	38	NM_001349297	23355	Hs.269263	NM_015303	ENSG00000156931	VPS8	KIAA0804	VPS8, CORVET complex subunit	protein-coding	23.05
chr2-31	chr2	64946328	64946597	Intergenic	Intergenic	-14015	NR_036586	400958	Hs.591565	NR_036586		LINC02245	-	long intergenic non-protein coding RNA 2245	ncRNA	23.02
chr19-44	chr19	12945564	12945833	Promoter	promoter-TSS (NR_072976)	-116	NM_001270362	5886	Hs.643267	NM_005053	ENSG00000179262	RAD23A	HHR23A|HR23A	RAD23 homolog A, nucleotide excision repair protein	protein-coding	23.02
chr7-31	chr7	35730532	35730801	Intergenic	Intergenic	14229	NR_108083	100506725	Hs.304253	NR_108082	ENSG00000227544	LOC100506725	-	uncharacterized LOC100506725	ncRNA	23
chr9-28	chr9	137628693	137628962	Genebody	MIR3|SINE|MIR	9835	NM_001354611	79813	Hs.495511	NM_024757	ENSG00000181090	EHMT1	EHMT1-IT1|EUHMTASE1|Eu-HMTase1|FP13812|GLP|GLP1|KLEFS1|KMT1D	euchromatic histone lysine methyltransferase 1	protein-coding	22.97
chr14-22	chr14	69360738	69361000	Intergenic	Intergenic	37435	NM_004450	2079	Hs.509791	NM_004450	ENSG00000100632	ERH	DROER	ERH, mRNA splicing and mitosis factor	protein-coding	22.92
chr4-24	chr4	1346931	1347200	Promoter	promoter-TSS (NM_001317934)	-201	NM_001317934	57654	Hs.380475	NM_020894	ENSG00000163945	UVSSA	KIAA1530|UVSS3	UV stimulated scaffold protein A	protein-coding	22.89
chr10-54	chr10	86413410	86413672	Intergenic	Intergenic	-47048	NM_017551	2894	Hs.530653	NM_017551	ENSG00000182771	GRID1	GluD1	glutamate ionotropic receptor delta type subunit 1	protein-coding	22.89
chr2-40	chr2	210170657	210170919	Promoter	CpG	582	NM_152519	151050	Hs.282260	NM_152519	ENSG00000144445	KANSL1L	C2orf67|MSL1v2	KAT8 regulatory NSL complex subunit 1 like	protein-coding	22.87
chr3-40	chr3	13418977	13419246	Promoter	intron (NM_024923, intron 1 of 39)	1208	NM_024923	23225	Hs.475525	NM_024923	ENSG00000132182	NUP210	GP210|POM210	nucleoporin 210	protein-coding	22.86
chr8-42	chr8	132775112	132775381	Promoter	promoter-TSS (NM_001277196)	-112	NM_198513	51105	Hs.304362	NM_016018	ENSG00000129292	PHF20L1	CGI-72|TDRD20B|URLC1	PHD finger protein 20 like 1	protein-coding	22.86
chr14-28	chr14	54488962	54489224	Promoter	promoter-TSS (NM_004124)	-67	NM_004124	2764	Hs.151413	NM_004124	ENSG00000197045	GMFB	GMF	glia maturation factor beta	protein-coding	22.84
chr6-23	chr6	42236804	42237069	Genebody	intron (NM_001297573, intron 15 of 17)	-19041	NM_018141	55173	Hs.380887	NM_018141	ENSG00000048544	MRPS10	MRP-S10|PNAS-122	mitochondrial ribosomal protein S10	protein-coding	22.83
chr8-17	chr8	37267601	37267867	Intergenic	MLT1H1|LTR|ERVL-MaLR	226179	NR_121620	100507420	Hs.105962	NR_121620		LINC01605	-	long intergenic non-protein coding RNA 1605	ncRNA	22.82
chr2-14	chr2	195658164	195658433	Promoter	intron (NM_020342, intron 1 of 9)	1170	NM_020342	57181	Hs.650158	NM_020342	ENSG00000196950	SLC39A10	LZT-Hs2	solute carrier family 39 member 10	protein-coding	22.81
chr17-64	chr17	51121795	51122064	Promoter	Intergenic	-1064	NM_003971	9043	Hs.463439	NM_003971	ENSG00000008294	SPAG9	CT89|HLC-6|HLC4|HLC6|JIP-4|JIP4|JLP|PHET|PIG6	sperm associated antigen 9	protein-coding	22.75
chr3-47	chr3	170181701	170181970	Promoter	promoter-TSS (NM_024947)	-86	NM_024947	80012	Hs.529592	NM_024947	ENSG00000173889	PHC3	EDR3|HPH3	polyhomeotic homolog 3	protein-coding	22.75
chr12-71	chr12	2877112	2877367	Promoter	promoter-TSS (NM_001257098)	40	NM_001252499	83695	Hs.198853	NM_001252499	ENSG00000171792	RHNO1	C12orf32|HKMT1188|RHINO	RAD9-HUS1-RAD1 interacting nuclear orphan 1	protein-coding	22.73
chr12-31	chr12	88299756	88300025	Intergenic	Intergenic	157594	NM_181783	160418	Hs.331268	NM_181783	ENSG00000139324	TMTC3	LIS8|SMILE	transmembrane and tetratricopeptide repeat containing 3	protein-coding	22.73
chr4-22	chr4	22740032	22740293	Genebody	intron (NM_001128432, intron 2 of 2)	26073	NM_001277225	57733	Hs.653107	NM_020973	ENSG00000249948	GBA3	CBG|CBGL1|GLUC|KLRP	glucosylceramidase beta 3 (gene/pseudogene)	protein-coding	22.7
chr13-21	chr13	40070394	40070655	Intergenic	MIRc|SINE|MIR	-111285	NR_046870	100874127	Hs.578028	NR_046870	ENSG00000230710	LINC00332	NCRNA00332	long intergenic non-protein coding RNA 332	ncRNA	22.68
chr16-74	chr16	1351768	1352037	Promoter	promoter-TSS (NM_032520)	3	NM_032520	84572	Hs.241575	NM_032520	ENSG00000090581	GNPTG	C16orf27|GNPTAG|LP2537|RJD9	N-acetylglucosamine-1-phosphate transferase subunit gamma	protein-coding	22.65
chr15-29	chr15	58749682	58749951	Promoter	5' UTR (NM_001320570, exon 1 of 15)	162	NM_001110	102	Hs.172028	NM_001110	ENSG00000137845	ADAM10	AD10|AD18|CD156c|CDw156|HsT18717|MADM|RAK|kuz	ADAM metallopeptidase domain 10	protein-coding	22.65
chr8-20	chr8	17922689	17922958	Promoter	promoter-TSS (NM_001352652)	-34	NM_001352645	5108	Hs.491148	NM_006197	ENSG00000078674	PCM1	PTC4|RET/PCM-1	pericentriolar material 1	protein-coding	22.65
chr16-60	chr16	4416710	4416979	Promoter	promoter-TSS (NM_001351729).2	117	NM_001201472	79585	Hs.437957	NM_024535	ENSG00000262246	CORO7	0610011B16Rik|CRN7|POD1	coronin 7	protein-coding	22.65
chr11-32	chr11	64181590	64181859	Intergenic	Intergenic	-3548	NM_001282652	10963	Hs.337295	NM_006819	ENSG00000168439	STIP1	HEL-S-94n|HOP|IEF-SSP-3521|P60|STI1|STI1L	stress induced phosphoprotein 1	protein-coding	22.62
chr8-22	chr8	81842042	81842311	Promoter	non-coding (NR_145472, exon 1 of 7)	110	NM_152837	64089	Hs.492121	NM_022133	ENSG00000104497	SNX16	-	sorting nexin 16	protein-coding	22.57
chr12-48	chr12	109996318	109996587	Promoter	promoter-TSS (NM_139201)	-63	NM_057170	9815	Hs.434996	NM_014776	ENSG00000139436	GIT2	CAT-2|CAT2|PKL	GIT ArfGAP 2	protein-coding	22.57
chr3-53	chr3	49358245	49358514	Promoter	TTS (NM_001313947)	221	NM_001329455	2876	Hs.76686	NM_000581	ENSG00000233276	GPX1	GPXD|GSHPX1	glutathione peroxidase 1	protein-coding	22.51
chr17-65	chr17	1834460	1834719	Genebody	intron (NM_001355120, intron 1 of 16)	4618	NM_001355120	6117	Hs.461925	NM_002945	ENSG00000132383	RPA1	HSSB|MST075|REPA1|RF-A|RP-A|RPA70	replication protein A1	protein-coding	22.49
chr12-39	chr12	121352381	121352650	Promoter	promoter-TSS (NM_016237)	-53	NM_001330489	51433	Hs.7101	NM_016237	ENSG00000089053	ANAPC5	APC5	anaphase promoting complex subunit 5	protein-coding	22.49
chr22-39	chr22	25085901	25086168	Genebody	L2b|LINE|L2	26658	NR_038941	100128531	Hs.662126	NR_038941	ENSG00000203280	LOC100128531	-	uncharacterized LOC100128531	ncRNA	22.49
chr2-33	chr2	227325036	227325304	Promoter	promoter-TSS (NM_001277064)	-6	NR_102371	654841	Hs.659982	NR_102371	ENSG00000236432	LOC654841	-	uncharacterized LOC654841	ncRNA	22.46
chr17-68	chr17	82457978	82458247	Promoter	promoter-TSS (NM_012336)	-72	NM_001038618	26502	Hs.256526	NM_012336	ENSG00000141562	NARF	IOP2	nuclear prelamin A recognition factor	protein-coding	22.43
chr2-41	chr2	112692400	112692669	Intergenic	Intergenic	-28952	NM_001350494	284958	Hs.589714	NM_001350494	ENSG00000144130	NT5DC4	-	5'-nucleotidase domain containing 4	protein-coding	22.43
chr15-15	chr15	40894332	40894601	Promoter	promoter-TSS (NM_020857)	36	NM_020857	57617	Hs.23876	NM_020857	ENSG00000104142	VPS18	PEP3	VPS18, CORVET/HOPS core subunit	protein-coding	22.38
chr19-69	chr19	45001129	45001393	Promoter	promoter-TSS (NM_006509)	-188	NM_006509	5971	Hs.654402	NM_006509	ENSG00000104856	RELB	I-REL|IMD53|IREL|REL-B	RELB proto-oncogene, NF-kB subunit	protein-coding	22.36
chr17-63	chr17	48892343	48892607	Promoter	promoter-TSS (NM_005175)	-311	NM_001002027	516	Hs.80986	NM_005175	ENSG00000159199	ATP5MC1	ATP5A|ATP5G|ATP5G1	ATP synthase membrane subunit c locus 1	protein-coding	22.36
chr11-22	chr11	125592372	125592632	Promoter	promoter-TSS (NR_132372)	66	NR_132372	105369550	Hs.732083	NR_132372	ENSG00000254671	STT3A-AS1	-	STT3A antisense RNA 1	ncRNA	22.35
chr19-61	chr19	10836386	10836655	Promoter	promoter-TSS (NR_104015)	-213	NM_006858	11018	Hs.211463	NM_006858	ENSG00000099203	TMED1	IL1RL1LG|Il1rl1l|Tp24|p24g1	transmembrane p24 trafficking protein 1	protein-coding	22.35
chr17-54	chr17	37609399	37609668	Promoter	promoter-TSS (NM_001163547)	-95	NM_001163547	11276	Hs.594647	NM_007247	ENSG00000275066	SYNRG	AP1GBP1|SYNG	synergin gamma	protein-coding	22.32
chr12-58	chr12	121663906	121664175	Genebody	MLT1K|LTR|ERVL-MaLR	5614	NM_173855	283385	Hs.434154	NM_173855	ENSG00000139714	MORN3	-	MORN repeat containing 3	protein-coding	22.3
chr15-25	chr15	44784329	44784590	Intergenic	LTR13|LTR|ERVK	48097	NM_182985	140691	Hs.745248	NM_080745	ENSG00000185880	TRIM69	HSD-34|HSD34|RNF36|Trif	tripartite motif containing 69	protein-coding	22.26
chr11-30	chr11	62679007	62679275	Promoter	promoter-TSS (NM_001286078)	-24	NM_001286077	51035	Hs.351296	NM_015853	ENSG00000162191	UBXN1	2B28|SAKS1|UBXD10	UBX domain protein 1	protein-coding	22.25
chr3-31	chr3	39383182	39383445	Promoter	promoter-TSS (NM_017875)	-11	NM_017875	54977	Hs.369615	NM_017875	ENSG00000144659	SLC25A38	SIDBA2	solute carrier family 25 member 38	protein-coding	22.23
chr14-35	chr14	34043940	34044209	Intergenic	Intergenic	-92996	NM_022073	112399	Hs.135507	NM_022073	ENSG00000129521	EGLN3	HIFP4H3|HIFPH3|PHD3	egl-9 family hypoxia inducible factor 3	protein-coding	22.22
chr17-52	chr17	40322771	40323040	Genebody	intron (NM_001145302, intron 1 of 6)	4684	NM_001145301	5914	Hs.654583	NM_000964	ENSG00000131759	RARA	NR1B1|RAR	retinoic acid receptor alpha	protein-coding	22.14
chr6-22	chr6	41895831	41896095	Promoter	promoter-TSS (NM_018561)	-602	NM_018561	25862	Hs.593575	NM_018561	ENSG00000164663	USP49	-	ubiquitin specific peptidase 49	protein-coding	22.09
chr17-77	chr17	65039713	65039982	Genebody	L2c|LINE|L2	15927	NM_001282425	10672	Hs.515018	NM_006572	ENSG00000120063	GNA13	G13	G protein subunit alpha 13	protein-coding	22.08
chr1-111	chr1	212414895	212415159	Promoter	promoter-TSS (NM_001198862)	-102	NM_018252	55248	Hs.445386	NM_018252	ENSG00000065600	TMEM206	C1orf75	transmembrane protein 206	protein-coding	22.06
chr2-30	chr2	241881707	241881963	Promoter	intron (NR_110220, intron 1 of 3)	472	NR_110220	101927289	Hs.130180	NR_110220	ENSG00000233806	LINC01237	-	long intergenic non-protein coding RNA 1237	ncRNA	22.05
chr3-32	chr3	183516318	183516585	Genebody	intron (NM_130446, intron 2 of 6)	-32284	NR_046687	100874019		NR_046687	ENSG00000242522	KLHL6-AS1	-	KLHL6 antisense RNA 1	ncRNA	22.03
chr10-34	chr10	119892432	119892701	Promoter	promoter-TSS (NR_037771)	-7	NR_037771	11196	Hs.435004	NM_007190	ENSG00000107651	SEC23IP	MSTP053|P125|P125A	SEC23 interacting protein	protein-coding	22.03
chr6-24	chr6	37172291	37172560	Genebody	intron (NM_001243186, intron 4 of 5)	2279	NM_002648	5292	Hs.81170	NM_002648	ENSG00000137193	PIM1	PIM	Pim-1 proto-oncogene, serine/threonine kinase	protein-coding	21.98
chr12-34	chr12	92362865	92363134	Intergenic	Intergenic	-58532	NR_027932	574028	Hs.730377	NM_001025233	ENSG00000257127	CLLU1	-	chronic lymphocytic leukemia up-regulated 1	ncRNA	21.98
chr1-102	chr1	9717578	9717847	Genebody	intron (NM_001350234, intron 8 of 23)	26245	NM_001350235	5293	Hs.518451	NM_005026	ENSG00000171608	PIK3CD	APDS|IMD14|P110DELTA|PI3K|p110D	phosphatidylinositol-4,5-bisphosphate 3-kinase catalytic subunit delta	protein-coding	21.9
chr8-24	chr8	55973101	55973362	Genebody	intron (NM_001111097, intron 10 of 12)	-70376	NR_145767	109617001		NR_145767	ENSG00000199405	SNORA1B	-	small nucleolar RNA, H/ACA box 1B	snoRNA	21.88
chr10-29	chr10	7472113	7472382	Intergenic	Intergenic	-60761	NM_001029880	57713	Hs.407983	NM_001018039	ENSG00000198879	SFMBT2	-	Scm like with four mbt domains 2	protein-coding	21.87
chr1-148	chr1	23911012	23911281	Genebody	MamGypLTR1a|LTR|Gypsy	2181	NM_001841	1269	Hs.73037	NM_001841	ENSG00000188822	CNR2	CB-2|CB2|CX5	cannabinoid receptor 2	protein-coding	21.87
chr2-37	chr2	29116439	29116708	Promoter	intron (NM_024692, intron 1 of 15)	1147	NM_024692	79745	Hs.122927	NM_024692	ENSG00000115295	CLIP4	RSNL2	CAP-Gly domain containing linker protein family member 4	protein-coding	21.87
chr19-56	chr19	5680814	5681083	Promoter	promoter-TSS (NM_001308240)	-52	NM_001308240	125988	Hs.356626	NM_205767	ENSG00000174917	C19orf70	MIC13|P117|QIL1	chromosome 19 open reading frame 70	protein-coding	21.76
chr5-35	chr5	112737718	112737981	Promoter	promoter-TSS (NM_000038)	-10	NM_001127510	324	Hs.158932	NM_000038	ENSG00000134982	APC	BTPS2|DP2|DP2.5|DP3|GS|PPP1R46	APC, WNT signaling pathway regulator	protein-coding	21.76
chr19-64	chr19	38004540	38004809	Genebody	MLT1K|LTR|ERVL-MaLR	97453	NM_015073	23094	Hs.655502	NM_015073	ENSG00000105738	SIPA1L3	CTRCT45|SPAL3|SPAR3	signal induced proliferation associated 1 like 3	protein-coding	21.76
chr21-44	chr21	42524769	42525038	Genebody	MER21C|LTR|ERVL	11050	NM_001320537	54020	Hs.547009	NM_018964	ENSG00000160190	SLC37A1	G3PP	solute carrier family 37 member 1	protein-coding	21.76
chr11-41	chr11	67464511	67464759	Genebody	non-coding (NR_073413, exon 7 of 7)	4642	NR_073411	80194	Hs.288761	NM_025124	ENSG00000172663	TMEM134	-	transmembrane protein 134	protein-coding	21.74
chr1-133	chr1	236524452	236524721	Promoter	promoter-TSS (NR_034040)	-78	NR_034040	100287902	Hs.677376	NR_034040	ENSG00000223776	LGALS8-AS1	-	LGALS8 antisense RNA 1	ncRNA	21.73
chr14-30	chr14	65102421	65102689	Promoter	promoter-TSS (NM_001271068)	-11	NM_001271068	4149	Hs.285354	NM_002382	ENSG00000125952	MAX	bHLHd4	MYC associated factor X	protein-coding	21.68
chr5-34	chr5	171388465	171388734	Promoter	CpG	895	NM_199185	4869	Hs.557550	NM_002520	ENSG00000181163	NPM1	B23|NPM	nucleophosmin 1	protein-coding	21.65
chr1-120	chr1	156505074	156505343	Intergenic	CpG	-4366	NM_005920	4209	Hs.314327	NM_005920	ENSG00000116604	MEF2D	-	myocyte enhancer factor 2D	protein-coding	21.65
chr17-49	chr17	27332572	27332841	Intergenic	Intergenic	38685	NM_134265	26118	Hs.446017	NM_015626	ENSG00000109046	WSB1	SWIP1|WSB-1	WD repeat and SOCS box containing 1	protein-coding	21.65
chr13-19	chr13	51452970	51453239	Promoter	promoter-TSS (NM_001306091)	35	NM_012141	26512	Hs.439440	NM_012141	ENSG00000102786	INTS6	DBI-1|DDX26|DDX26A|DICE1|HDB|INT6|Notchl2	integrator complex subunit 6	protein-coding	21.6
chr10-46	chr10	26574887	26575151	Intergenic	Tigger6a|DNA|TcMar-Tigger	4288	NR_134472	101929117	Hs.127031	NR_134472		LOC101929117	-	uncharacterized LOC101929117	ncRNA	21.6
chr3-46	chr3	33798355	33798616	Promoter	promoter-TSS (NM_001256192)	-86	NM_001256192	10015	Hs.475896	NM_013374	ENSG00000170248	PDCD6IP	AIP1|ALIX|DRIP4|HP95	programmed cell death 6 interacting protein	protein-coding	21.6
chr9-32	chr9	34646448	34646717	Promoter	promoter-TSS (NM_000155)	-7	NM_000155	2592	Hs.522090	NM_000155	ENSG00000213930	GALT	-	galactose-1-phosphate uridylyltransferase	protein-coding	21.57
chr7-36	chr7	144127713	144127982	Promoter	Intergenic	-1266	NM_001001659	135941	Hs.534547	NM_001001659	ENSG00000221938	OR2A14	OR2A14P|OR2A6|OST182	olfactory receptor family 2 subfamily A member 14	protein-coding	21.55
chr10-49	chr10	12043320	12043587	Promoter	promoter-TSS (NM_080599)	-283	NM_080599	26019	Hs.370689	NM_015542	ENSG00000151461	UPF2	HUPF2|RENT2|smg-3	UPF2, regulator of nonsense mediated mRNA decay	protein-coding	21.55
chr2-51	chr2	99180913	99181182	Promoter	promoter-TSS (NM_145212)	14	NM_001320418	129531	Hs.14222	NM_138798	ENSG00000158411	MITD1	-	microtubule interacting and trafficking domain containing 1	protein-coding	21.49
chr3-37	chr3	57756052	57756303	Promoter	Intergenic	-1079	NM_001304421	7871	Hs.476432	NM_007159	ENSG00000163681	SLMAP	SLAP	sarcolemma associated protein	protein-coding	21.45
chr1-101	chr1	228486970	228487239	Promoter	promoter-TSS (NM_001010858)	-263	NM_001010858	149603	Hs.356377	NM_001010858	ENSG00000168159	RNF187	RACO-1|RACO1	ring finger protein 187	protein-coding	21.44
chr20-24	chr20	44966268	44966537	Promoter	promoter-TSS (NM_001352385)	56	NR_038341	100505826	Hs.196065	NR_038341	ENSG00000227477	STK4-AS1	-	STK4 antisense RNA 1 (head to head)	ncRNA	21.44
chr19-71	chr19	43584149	43584403	Genebody	TTS (NM_001007561)	3670	NM_001321124	390940	Hs.22049	NM_001193621	ENSG00000234465	PINLYP	-	phospholipase A2 inhibitor and LY6/PLAUR domain containing	protein-coding	21.43
chr3-35	chr3	23830881	23831150	Genebody	MIR|SINE|MIR	20572	NM_001202476	7324	Hs.164853	NM_003341	ENSG00000170142	UBE2E1	UBCH6	ubiquitin conjugating enzyme E2 E1	protein-coding	21.41
chr2-35	chr2	189762457	189762726	Promoter	promoter-TSS (NR_102429)	-189	NR_102429	101409258	Hs.738558	NR_102429		OSGEPL1-AS1	-	OSGEPL1 antisense RNA 1	ncRNA	21.39
chrX-16	chrX	71365849	71366114	Promoter	promoter-TSS (NR_104390)	-258	NM_004606	6872	Hs.158560	NM_004606	ENSG00000147133	TAF1	BA2R|CCG1|CCGS|DYT3|DYT3/TAF1|KAT4|MRXS33|N-TAF1|NSCL2|OF|P250|TAF(II)250|TAF2A|TAFII-250|TAFII250|XDP	TATA-box binding protein associated factor 1	protein-coding	21.38
chr2-45	chr2	157444024	157444275	Promoter	promoter-TSS (NM_004288)	-57	NM_004288	9595	Hs.270	NM_004288	ENSG00000115165	CYTIP	B3-1|CASP|CYBR|CYTHIP|HE|PSCDBP	cytohesin 1 interacting protein	protein-coding	21.34
chr12-54	chr12	132492522	132492786	Genebody	intron (NM_001142641, intron 1 of 16)	2083	NM_001142641	57666	Hs.411138	NM_001142641	ENSG00000112787	FBRSL1	-	fibrosin like 1	protein-coding	21.33
chr12-26	chr12	49069834	49070103	Promoter	promoter-TSS (NR_130123)	57	NR_130123	121268	Hs.159013	NM_144593	ENSG00000167550	RHEBL1	RHEBL1c	RHEB like 1	protein-coding	21.31
chr1-131	chr1	37288934	37289200	Intergenic	MLT1H|LTR|ERVL-MaLR	127504	NR_036217	100422898		NR_036217	ENSG00000264698	MIR4255	-	microRNA 4255	ncRNA	21.27
chrX-28	chrX	73563182	73563448	Promoter	promoter-TSS (NR_029423)	167	NM_001039840	53344	Hs.496323	NM_001039840	ENSG00000204116	CHIC1	BRX	cysteine rich hydrophobic domain 1	protein-coding	21.25
chr16-65	chr16	3283289	3283558	Promoter	promoter-TSS (NM_005741)	-64	NM_005741	10127	Hs.611475	NM_005741	ENSG00000006194	ZNF263	FPM315|ZKSCAN12|ZSCAN44	zinc finger protein 263	protein-coding	21.22
chr10-64	chr10	110304873	110305142	Promoter	promoter-TSS (NM_005871)	-58	NM_005871	10285	Hs.632093	NM_005871	ENSG00000119953	SMNDC1	SMNR|SPF30|TDRD16C	survival motor neuron domain containing 1	protein-coding	21.2
chr4-28	chr4	77156943	77157206	Promoter	promoter-TSS (NM_004354)	-130	NM_004354	901	Hs.740456	NM_004354	ENSG00000138764	CCNG2	-	cyclin G2	protein-coding	21.19
chr17-71	chr17	81927643	81927912	Promoter	promoter-TSS (NM_002359)	-52	NR_015454	92659	Hs.336958	NR_015454	ENSG00000265688	MAFG-DT	MAFG-AS1	MAFG divergent transcript	ncRNA	21.17
chr10-66	chr10	95837942	95838198	Genebody	intron (NM_001164183, intron 2 of 7)	-69895	NM_001130446	387707	Hs.652240	NM_001001732	ENSG00000188649	CC2D2B	C10orf130|C10orf131	coiled-coil and C2 domain containing 2B	protein-coding	21.15
chr3-50	chr3	50590507	50590776	Intergenic	Intergenic	-19614	NM_001171741	51161	Hs.517860	NM_016210	ENSG00000088543	C3orf18	G20	chromosome 3 open reading frame 18	protein-coding	21.14
chr11-35	chr11	28105991	28106239	Genebody	intron (NM_031217, intron 1 of 16)	2084	NM_031217	81930	Hs.301052	NM_031217	ENSG00000121621	KIF18A	MS-KIF18A|PPP1R99	kinesin family member 18A	protein-coding	21.07
chr4-40	chr4	6855712	6855981	Genebody	intron (NM_001100590, intron 3 of 8)	-53598	NM_001113361	57533	Hs.518611	NM_020773	ENSG00000132405	TBC1D14	-	TBC1 domain family member 14	protein-coding	21.06
chr19-66	chr19	49340332	49340600	Genebody	TTS (NM_001256659)	5046	NM_001040031	951	Hs.166556	NM_001774	ENSG00000104894	CD37	GP52-40|TSPAN26	CD37 molecule	protein-coding	21.06
chr9-49	chr9	99660200	99660460	Genebody	intron (NR_109802, intron 3 of 6)	159559	NR_109802	101928438	Hs.637767	NR_109802	ENSG00000237461	LOC101928438	-	uncharacterized LOC101928438	ncRNA	21.04
chr10-45	chr10	74176303	74176572	Promoter	promoter-TSS (NM_001123)	-52	NM_001202449	132	Hs.656586	NM_001123	ENSG00000156110	ADK	AK	adenosine kinase	protein-coding	21.01
chr3-34	chr3	58214528	58214748	Intergenic	Intergenic	-3635	NM_001256560	1776	Hs.476453	NM_004944	ENSG00000163687	DNASE1L3	DHP2|DNAS1L3|LSD|SLEB16	deoxyribonuclease 1 like 3	protein-coding	20.96
chr7-34	chr7	25968257	25968526	Intergenic	Intergenic	-18405	NR_029597	406940		NR_029597	ENSG00000199085	MIR148A	MIRN148|MIRN148A|hsa-mir-148|mir-148a	microRNA 148a	ncRNA	20.93
chr8-29	chr8	28093310	28093569	Promoter	intron (NM_001284225, intron 1 of 12)	372	NM_018091	55140	Hs.491336	NM_018091	ENSG00000134014	ELP3	KAT9	elongator acetyltransferase complex subunit 3	protein-coding	20.9
chr14-43	chr14	77098069	77098336	Promoter	promoter-TSS (NM_033426)	-33	NM_033426	85457	Hs.709066	NM_033426	ENSG00000198894	CIPC	KIAA1737	CLOCK interacting pacemaker	protein-coding	20.9
chr10-23	chr10	102117757	102118025	Genebody	(TG)n|Simple_repeat|Simple_repeat	2582	NM_001321612	8861	Hs.454418	NM_003893	ENSG00000198728	LDB1	CLIM-2|CLIM2|LDB-1|NLI	LIM domain binding 1	protein-coding	20.9
chr6-46	chr6	31196954	31197216	Promoter	promoter-TSS (NR_026791)	-675	NR_026791	253018	Hs.659818	NR_026791	ENSG00000206344	HCG27	bCX101P6.9|bPG299F13.9|bQB115I13.2	HLA complex group 27 (non-protein coding)	ncRNA	20.88
chr1-105	chr1	6601132	6601401	Promoter	intron (NM_001324309, intron 1 of 3)	1632	NM_014851	9903	Hs.7764	NM_014851	ENSG00000162413	KLHL21	-	kelch like family member 21	protein-coding	20.85
chr13-24	chr13	97986887	97987156	Genebody	intron (NM_002271, intron 6 of 28)	33346	NM_002271	3843	Hs.712598	NM_002271	ENSG00000065150	IPO5	IMB3|KPNB3|Pse1|RANBP5|imp5	importin 5	protein-coding	20.85
chr7-59	chr7	74293436	74293705	Genebody	intron (NM_003388, intron 1 of 16)	4095	NM_003388	7461	Hs.647018	NM_003388	ENSG00000106665	CLIP2	CLIP|CLIP-115|CYLN2|WBSCR3|WBSCR4|WSCR3|WSCR4	CAP-Gly domain containing linker protein 2	protein-coding	20.82
chr17-51	chr17	40100571	40100840	Promoter	promoter-TSS (NM_021724)	20	NM_021724	9572	Hs.724	NM_021724	ENSG00000126368	NR1D1	EAR1|REVERBA|REVERBalpha|THRA1|THRAL|ear-1|hRev	nuclear receptor subfamily 1 group D member 1	protein-coding	20.8
chr10-59	chr10	110357379	110357648	Intergenic	Intergenic	-52564	NM_005871	10285	Hs.632093	NM_005871	ENSG00000119953	SMNDC1	SMNR|SPF30|TDRD16C	survival motor neuron domain containing 1	protein-coding	20.77
chr16-59	chr16	30748022	30748291	Promoter	promoter-TSS (NM_001172432)	-143	NM_000294	5261	Hs.65735	NM_000294	ENSG00000156873	PHKG2	GSD9C	phosphorylase kinase catalytic subunit gamma 2	protein-coding	20.77
chr16-56	chr16	22437824	22438088	Promoter	promoter-TSS (NR_027460)	-241	NR_027460	100131998	Hs.709576	NR_027460		RRN3P3	-	RRN3 homolog, RNA polymerase I transcription factor pseudogene 3	pseudo	20.7
chr8-21	chr8	98117120	98117389	Promoter	promoter-TSS (NM_001145861)	-39	NM_001145861	10940	Hs.252828	NM_015029	ENSG00000104356	POP1	ANXD2	POP1 homolog, ribonuclease P/MRP subunit	protein-coding	20.61
chr4-25	chr4	36241890	36242159	Promoter	intron (NM_015230, intron 1 of 32)	1915	NR_146893	116984	Hs.479451	NM_015230	ENSG00000047365	ARAP2	CENTD1|PARX	ArfGAP with RhoGAP domain, ankyrin repeat and PH domain 2	protein-coding	20.61
chr1-125	chr1	39817311	39817580	Intergenic	Intergenic	28469	NR_135805	101929536	Hs.552820	NR_135805	ENSG00000261798	LOC101929536	-	uncharacterized LOC101929536	ncRNA	20.61
chr11-31	chr11	63939036	63939305	Promoter	promoter-TSS (NM_001300800)	-161	NM_001300800	79829	Hs.523753	NM_024771	ENSG00000110583	NAA40	NAT11|NatD|PATT1|hNatD	N(alpha)-acetyltransferase 40, NatD catalytic subunit	protein-coding	20.5
chr9-57	chr9	112225023	112225292	Genebody	intron (NM_001244896, intron 11 of 12)	-49860	NM_001282640	64420	Hs.494827	NM_022486	ENSG00000106868	SUSD1	-	sushi domain containing 1	protein-coding	20.47
chr1-142	chr1	203271086	203271355	Intergenic	MLT1J|LTR|ERVL-MaLR	-15932	NR_117097	100506775	Hs.443859	NR_117097	ENSG00000231507	LINC01353	-	long intergenic non-protein coding RNA 1353	ncRNA	20.45
chr16-67	chr16	71816591	71816860	Intergenic	Intergenic	-7652	NM_001128	164	Hs.461253	NM_001128	ENSG00000166747	AP1G1	ADTG|CLAPG1	adaptor related protein complex 1 subunit gamma 1	protein-coding	20.39
chr18-18	chr18	49460658	49460908	Promoter	promoter-TSS (NM_017653)	-50	NM_001353212	54808	Hs.162996	NM_017653	ENSG00000141627	DYM	DMC|SMC	dymeclin	protein-coding	20.35
chr15-28	chr15	90954731	90955000	Promoter	promoter-TSS (NM_033544)	-11	NM_033544	91433	Hs.655895	NM_033544	ENSG00000166965	RCCD1	-	RCC1 domain containing 1	protein-coding	20.34
chr2-77	chr2	26764127	26764396	Promoter	promoter-TSS (NM_017877)	-13	NM_017877	54978	Hs.1594	NM_017877	ENSG00000213699	SLC35F6	ANT2BP|C2orf18|TANGO9	solute carrier family 35 member F6	protein-coding	20.31
chr1-109	chr1	51878737	51879006	Promoter	promoter-TSS (NM_002525)	66	NM_001101662	4898	Hs.584782	NM_002525	ENSG00000078618	NRDC	NRD1|hNRD1|hNRD2	nardilysin convertase	protein-coding	20.31
chr3-44	chr3	128879391	128879651	Promoter	promoter-TSS (NM_014049)	31	NM_014049	28976	Hs.567482	NM_014049	ENSG00000177646	ACAD9	NPD002	acyl-CoA dehydrogenase family member 9	protein-coding	20.29
chr10-57	chr10	63132941	63133208	Promoter	promoter-TSS (NM_001282405)	-173	NM_001282405	29982	Hs.449628	NM_030759	ENSG00000148572	NRBF2	COPR|COPR1|COPR2|NRBF-2	nuclear receptor binding factor 2	protein-coding	20.28
chr17-73	chr17	40598614	40598867	Intergenic	Intergenic	-33256	NM_001838	1236	Hs.370036	NM_001838	ENSG00000126353	CCR7	BLR2|CC-CKR-7|CCR-7|CD197|CDw197|CMKBR7|EBI1	C-C motif chemokine receptor 7	protein-coding	20.28
chr16-94	chr16	15908085	15908354	Intergenic	MLT1K|LTR|ERVL-MaLR	-19570	NR_130756	123811	Hs.514179	NM_144600	ENSG00000133393	FOPNL	C16orf63|FOR20|PHSECRG2	FGFR1OP N-terminal like	protein-coding	20.26
chr17-76	chr17	50095082	50095351	Promoter	promoter-TSS (NM_002611)	-59	NM_001199900	5164	Hs.256667	NM_002611	ENSG00000005882	PDK2	PDHK2|PDKII	pyruvate dehydrogenase kinase 2	protein-coding	20.23
chr15-38	chr15	70259029	70259298	Intergenic	MLT1N2|LTR|ERVL-MaLR	-161246	NM_020908	7090	Hs.287362	NM_005078	ENSG00000140332	TLE3	ESG|ESG3|GRG3|HsT18976	transducin like enhancer of split 3	protein-coding	20.23
chrX-22	chrX	37786728	37786997	Genebody	intron (NM_000397, intron 3 of 12)	6845	NM_000397	1536	Hs.292356	NM_000397	ENSG00000165168	CYBB	AMCBX2|CGD|GP91-1|GP91-PHOX|GP91PHOX|IMD34|NOX2|p91-PHOX	cytochrome b-245 beta chain	protein-coding	20.23
chrX-18	chrX	101348868	101349137	Promoter	promoter-TSS (NM_004085)	-33	NM_004085	1678	Hs.447877	NM_004085	ENSG00000126953	TIMM8A	DDP|DDP1|DFN1|MTS|TIM8	translocase of inner mitochondrial membrane 8A	protein-coding	20.18
chr15-23	chr15	41929336	41929591	Genebody	TTS (NR_120332)	8046	NR_120332	101928363	Hs.680195	NR_120332		EHD4-AS1	-	EHD4 antisense RNA 1	ncRNA	20.13
chr5-47	chr5	132663243	132663498	Intergenic	Intergenic	5197	NM_002188	3596	Hs.845	NM_002188	ENSG00000169194	IL13	IL-13|P600	interleukin 13	protein-coding	20.13
chr9-21	chr9	72362665	72362934	Promoter	intron (NM_001102421, intron 1 of 5)	1793	NM_001278243	7763	Hs.406096	NM_006007	ENSG00000107372	ZFAND5	ZA20D2|ZFAND5A|ZNF216	zinc finger AN1-type containing 5	protein-coding	20.12
chrX-17	chrX	115562619	115562887	Promoter	promoter-TSS (NR_110383)	-22	NR_110383	101927352	Hs.571683	NR_110383	ENSG00000271826	PLS3-AS1	-	PLS3 antisense RNA 1	ncRNA	20.12
chr8-19	chr8	22973867	22974136	Intergenic	Intergenic	-13416	NM_001160036	23221	Hs.372688	NM_015178	ENSG00000008853	RHOBTB2	DBC2	Rho related BTB domain containing 2	protein-coding	20.1
chr3-51	chr3	196920810	196921079	Genebody	MLT1H|LTR|ERVL-MaLR	-18933	NR_046630	100874001	Hs.591671	NR_046630		NCBP2-AS1	-	NCBP2 antisense RNA 1	ncRNA	20.07
chr16-70	chr16	2603207	2603469	Promoter	promoter-TSS (NR_015441)	-46	NR_015441	652276	Hs.720448	NR_015441	ENSG00000215154	LOC652276	-	potassium channel tetramerization domain containing 5 pseudogene	pseudo	20.06
chr12-35	chr12	92970981	92971240	Intergenic	MLT1I|LTR|ERVL-MaLR	-41779	NM_003566	8411	Hs.567367	NM_003566	ENSG00000102189	EEA1	MST105|MSTP105|ZFYVE2	early endosome antigen 1	protein-coding	19.98
chr1-122	chr1	160789782	160790051	Intergenic	Intergenic	-6158	NM_001261456	4063	Hs.403857	NM_002348	ENSG00000122224	LY9	CD229|SLAMF3|hly9|mLY9	lymphocyte antigen 9	protein-coding	19.96
chr20-25	chr20	48760363	48760632	Genebody	MIRb|SINE|MIR	67386	NM_020820	57580	Hs.153310	NM_020820	ENSG00000124126	PREX1	P-REX1	phosphatidylinositol-3,4,5-trisphosphate dependent Rac exchange factor 1	protein-coding	19.94
chr1-127	chr1	236066854	236067122	Promoter	Intergenic	-1807	NM_002508	4811	Hs.356624	NM_002508	ENSG00000116962	NID1	NID	nidogen 1	protein-coding	19.93
chr19-86	chr19	4457760	4458029	Promoter	promoter-TSS (NM_025241)	-100	NM_025241	80700	Hs.435255	NM_025241	ENSG00000167671	UBXN6	UBXD1|UBXDC2	UBX domain protein 6	protein-coding	19.91
chr6-138	chr6	29930105	29930371	Intergenic	LTR13A|LTR|ERVK	-3023	NR_001317	80868	Hs.661198	NR_001317		HCG4B	HCG4P6|HCGIV-06|HCGIV-6|HCGIV.5|bCX67J3.3|bPG309N1.1|bQB90C11.3	HLA complex group 4B (non-protein coding)	ncRNA	19.89
chr2-61	chr2	219218991	219219256	Promoter	promoter-TSS (NM_005689)	-106	NM_005689	10058	Hs.107911	NM_005689	ENSG00000115657	ABCB6	ABC|LAN|MTABC3|PRP|umat	ATP binding cassette subfamily B member 6 (Langereis blood group)	protein-coding	19.83
chr18-13	chr18	23231319	23231569	Genebody	intron (NR_023359, intron 4 of 6)	75619	NM_138375	91768	Hs.11108	NM_138375	ENSG00000134508	CABLES1	CABL1|CABLES|HsT2563|IK3-1	Cdk5 and Abl enzyme substrate 1	protein-coding	19.81
chr13-23	chr13	24694194	24694463	Genebody	intron (NM_001676, intron 10 of 22)	13917	NM_001185085	479	Hs.147111	NM_001676	ENSG00000075673	ATP12A	ATP1AL1|HK	ATPase H+/K+ transporting non-gastric alpha2 subunit	protein-coding	19.78
chr7-33	chr7	150435873	150436111	Genebody	MLT1H|LTR|ERVL-MaLR	2338	NR_034033	285972	Hs.647110	NR_034033	ENSG00000242258	LINC00996	-	long intergenic non-protein coding RNA 996	ncRNA	19.77
chr22-22	chr22	35380893	35381162	Promoter	promoter-TSS (NM_002133)	-40	NM_002133	3162	Hs.517581	NM_002133	ENSG00000100292	HMOX1	HMOX1D|HO-1|HSP32|bK286B10	heme oxygenase 1	protein-coding	19.75
chr7-35	chr7	101857011	101857280	Genebody	intron (NM_181552, intron 1 of 23)	39543	NM_181552	1523	Hs.191482	NM_001913	ENSG00000257923	CUX1	CASP|CDP|CDP/Cut|CDP1|COY1|CUTL1|CUX|Clox|Cux/CDP|GOLIM6|Nbla10317|p100|p110|p200|p75	cut like homeobox 1	protein-coding	19.75
chr10-39	chr10	80203208	80203474	Promoter	intron (NM_001278408, intron 1 of 16)	1150	NM_001278408	311	Hs.530291	NM_001157	ENSG00000122359	ANXA11	ALS23|ANX11|CAP-50|CAP50	annexin A11	protein-coding	19.75
chr1-132	chr1	226663100	226663364	Genebody	intron (NR_103784, intron 1 of 1)	11836	NR_103784	100506443	Hs.664293	NR_103784		ITPKB-IT1	-	ITPKB intronic transcript 1	ncRNA	19.74
chr10-133	chr10	101858823	101859092	Genebody	intron (NM_024541, intron 24 of 25)	-15037	NM_173193	30819	Hs.97044	NM_014591	ENSG00000120049	KCNIP2	KCHIP2	potassium voltage-gated channel interacting protein 2	protein-coding	19.72
chr17-70	chr17	59619416	59619668	Promoter	promoter-TSS (NM_004859)	-147	NM_004859	1213	Hs.491351	NM_004859	ENSG00000141367	CLTC	CHC|CHC17|CLH-17|CLTCL2|Hc|MRD56	clathrin heavy chain	protein-coding	19.62
chr6-45	chr6	155314978	155315239	Promoter	promoter-TSS (NM_001350501)	-625	NM_001350501	51106	Hs.279908	NM_016020	ENSG00000029639	TFB1M	CGI-75|CGI75|mtTFB|mtTFB1	transcription factor B1, mitochondrial	protein-coding	19.61
chr14-24	chr14	61695115	61695384	Promoter	promoter-TSS (NM_001530)	-152	NM_001530	3091	Hs.597216	NM_001530	ENSG00000100644	HIF1A	HIF-1-alpha|HIF-1A|HIF-1alpha|HIF1|HIF1-ALPHA|MOP1|PASD8|bHLHe78	hypoxia inducible factor 1 subunit alpha	protein-coding	19.61
chr17-74	chr17	51153458	51153723	Promoter	promoter-TSS (NM_198175)	31	NM_000269	4830	Hs.463456	NM_000269	ENSG00000239672	NME1	AWD|GAAD|NB|NBS|NDKA|NDPK-A|NDPKA|NM23|NM23-H1	NME/NM23 nucleoside diphosphate kinase 1	protein-coding	19.61
chrX-19	chrX	41084531	41084794	Promoter	promoter-TSS (NM_001039590)	-973	NM_001039591	8239	Hs.77578	NM_004652	ENSG00000124486	USP9X	DFFRX|FAF|FAM|MRX99|MRXS99F	ubiquitin specific peptidase 9, X-linked	protein-coding	19.6
chr19-60	chr19	47229441	47229710	Promoter	intron (NM_001127240, intron 1 of 3)	1619	NM_014417	27113	Hs.467020	NM_014417	ENSG00000105327	BBC3	JFY-1|JFY1|PUMA	BCL2 binding component 3	protein-coding	19.59
chr1-107	chr1	11062966	11063235	Intergenic	Intergenic	-3066	NM_003132	6723	Hs.76244	NM_003132	ENSG00000116649	SRM	PAPT|SPDSY|SPS1|SRML1	spermidine synthase	protein-coding	19.59
chr6-42	chr6	47440737	47441005	Intergenic	Intergenic	-36918	NM_012120	23607	Hs.485518	NM_012120	ENSG00000198087	CD2AP	CMS	CD2 associated protein	protein-coding	19.58
chr22-26	chr22	36901962	36902231	Intergenic	MLT1L|LTR|ERVL-MaLR	-11537	NM_000395	1439	Hs.592192	NM_000395	ENSG00000100368	CSF2RB	CD131|CDw131|IL3RB|IL5RB|SMDP5|betaGMR	colony stimulating factor 2 receptor beta common subunit	protein-coding	19.56
chr1-117	chr1	26534017	26534286	Genebody	MIRc|SINE|MIR	4393	NM_002953	6195	Hs.149957	NM_002953	ENSG00000117676	RPS6KA1	HU-1|MAPKAPK1A|RSK|RSK1|p90Rsk	ribosomal protein S6 kinase A1	protein-coding	19.53
chr2-50	chr2	112542053	112542322	Promoter	promoter-TSS (NR_136321)	25	NR_136321	105373562	Hs.599548	NR_136321		LOC105373562	-	uncharacterized LOC105373562	ncRNA	19.51
chr3-39	chr3	195951860	195952129	Intergenic	Intergenic	38285	NR_003264	255812	Hs.566872	NR_003264	ENSG00000185485	SDHAP1	SDHAL1|SDHALP1	succinate dehydrogenase complex flavoprotein subunit A pseudogene 1	pseudo	19.48
chr13-14	chr13	30616886	30617153	Promoter	promoter-TSS (NM_001321533)	578	NM_001313893	3146	Hs.434102	NM_002128	ENSG00000189403	HMGB1	HMG-1|HMG1|HMG3|SBP-1	high mobility group box 1	protein-coding	19.41
chr16-73	chr16	89216586	89216840	Promoter	promoter-TSS (NM_001201407)	-990	NR_037705	197320	Hs.647385	NM_182531	ENSG00000170100	ZNF778	-	zinc finger protein 778	protein-coding	19.41
chr10-53	chr10	102512001	102512270	Genebody	intron (NM_001178133, intron 2 of 10)	8173	NM_016169	51684	Hs.404089	NM_016169	ENSG00000107882	SUFU	JBTS32|PRO1280|SUFUH|SUFUXL	SUFU negative regulator of hedgehog signaling	protein-coding	19.35
chr7-45	chr7	100101312	100101574	Promoter	promoter-TSS (NM_004722)	-64	NM_004722	9179	Hs.632317	NM_004722	ENSG00000221838	AP4M1	CPSQ3|MU-4|MU-ARP2|SPG50	adaptor related protein complex 4 subunit mu 1	protein-coding	19.31
chr1-134	chr1	24965112	24965381	Promoter	promoter-TSS (NM_001320672)	-236	NM_001031680	864	Hs.170019	NM_004350	ENSG00000020633	RUNX3	AML2|CBFA3|PEBP2aC	runt related transcription factor 3	protein-coding	19.29
chr12-32	chr12	123427104	123427356	Genebody	MLT1G1|LTR|ERVL-MaLR	9503	NR_130703	196383	Hs.488173	NM_145058	ENSG00000150977	RILPL2	RLP2	Rab interacting lysosomal protein like 2	protein-coding	19.28
chr12-45	chr12	101279973	101280242	Promoter	promoter-TSS (NM_014503)	-20	NM_014503	27340	Hs.295732	NM_014503	ENSG00000120800	UTP20	1A6/DRIM|DRIM	UTP20, small subunit processome component	protein-coding	19.27
chr6-85	chr6	126086640	126086905	Intergenic	Intergenic	100342	NR_146802	60487	Hs.404186	NM_021820	ENSG00000066651	TRMT11	C6orf75|MDS024|TRM11|TRMT11-1	tRNA methyltransferase 11 homolog	protein-coding	19.26
chr7-52	chr7	116802927	116803196	Intergenic	Intergenic	-59448	NM_006136	830	Hs.446123	NM_006136	ENSG00000198898	CAPZA2	CAPPA2|CAPZ	capping actin protein of muscle Z-line subunit alpha 2	protein-coding	19.19
chr14-27	chr14	31262158	31262426	Intergenic	Intergenic	-54769	NM_015382	25831	Hs.708017	NM_015382	ENSG00000092148	HECTD1	EULIR	HECT domain E3 ubiquitin protein ligase 1	protein-coding	19.18
chr5-44	chr5	140401476	140401739	Promoter	promoter-TSS (NM_017747)	-207	NM_020690	404734	Hs.594084	NM_020690	ENSG00000254996	ANKHD1-EIF4EBP3	MASK-BP3|MASK-BP3ARF	ANKHD1-EIF4EBP3 readthrough	protein-coding	19.13
chr9-59	chr9	74173309	74173565	Intergenic	Intergenic	-198094	NR_121182	101927358	Hs.559523	NR_121182	ENSG00000227809	LOC101927358	-	uncharacterized LOC101927358	ncRNA	19.12
chr12-67	chr12	96215340	96215602	Genebody	intron (NM_005230, intron 1 of 4)	21089	NM_005230	2004	Hs.46523	NM_005230	ENSG00000111145	ELK3	ERP|NET|SAP-2|SAP2	ELK3, ETS transcription factor	protein-coding	19.12
chr22-44	chr22	29157841	29158110	Genebody	MLT1J2|LTR|ERVL-MaLR	-47937	NM_133455	129080	Hs.289106	NM_133455	ENSG00000186998	EMID1	EMI5|EMU1	EMI domain containing 1	protein-coding	19.1
chr12-29	chr12	103957178	103957432	Promoter	promoter-TSS (NM_001135570)	-90	NM_001135570	728568	Hs.42547	NM_001135570	ENSG00000204954	C12orf73	-	chromosome 12 open reading frame 73	protein-coding	19.1
chr22-54	chr22	36065768	36066031	Intergenic	CpG	-37362	NM_001082578	23543	Hs.282998	NM_014309	ENSG00000100320	RBFOX2	FOX2|Fox-2|HNRBP2|HRNBP2|RBM9|RTA|dJ106I20.3|fxh	RNA binding fox-1 homolog 2	protein-coding	19.07
chr18-19	chr18	13726533	13726796	Promoter	promoter-TSS (NM_001308263)	4	NM_003799	8731	Hs.592347	NM_003799	ENSG00000101654	RNMT	CMT1|CMT1c|MET|Met|RG7MT1|cm1p|hCMT1|hMet	RNA guanine-7 methyltransferase	protein-coding	19.05
chr11-28	chr11	120343488	120343757	Genebody	intron (NM_001198665, intron 1 of 39)	6713	NM_015313	23365	Hs.24598	NM_015313	ENSG00000196914	ARHGEF12	LARG|PRO2792	Rho guanine nucleotide exchange factor 12	protein-coding	19.02
chr6-68	chr6	111399620	111399861	Genebody	L1MC3|LINE|L1	-83732	NR_034111	643749	Hs.486228	NR_034108	ENSG00000231889	TRAF3IP2-AS1	C6UAS|C6orf3|NCRNA00248|TRAF3IP2-AS2	TRAF3IP2 antisense RNA 1	ncRNA	18.99
chr12-42	chr12	6230745	6231008	Genebody	intron (NM_001330312, intron 2 of 7)	30560	NM_001769	928	Hs.114286	NM_001769	ENSG00000010278	CD9	BTCC-1|DRAP-27|MIC3|MRP-1|TSPAN-29|TSPAN29	CD9 molecule	protein-coding	18.99
chr1-126	chr1	18902783	18903052	Promoter	promoter-TSS (NM_001319218)	-118	NM_170726	8659	Hs.77448	NM_003748	ENSG00000159423	ALDH4A1	ALDH4|P5CD|P5CDh	aldehyde dehydrogenase 4 family member A1	protein-coding	18.97
chr13-17	chr13	79393845	79394108	Genebody	MER50-int|LTR|ERV1	12245	NM_001286632	64062	Hs.558528	NM_018605	ENSG00000139746	RBM26	ARRS2|C13orf10|PPP1R132|PRO1777|SE70-2|ZC3H17	RNA binding motif protein 26	protein-coding	18.96
chr17-72	chr17	48578244	48578506	Promoter	promoter-TSS (NM_024015)	6	NM_024015	3214	Hs.664706	NM_024015	ENSG00000182742	HOXB4	HOX-2.6|HOX2|HOX2F	homeobox B4	protein-coding	18.93
chr10-32	chr10	97498443	97498684	Promoter	promoter-TSS (NM_022362)	46	NM_001351358	64210	Hs.500721	NM_022362	ENSG00000155229	MMS19	MET18|MMS19L|hMMS19	MMS19 homolog, cytosolic iron-sulfur assembly component	protein-coding	18.93
chr11-39	chr11	120326844	120327113	Promoter	intron (NM_001198675, intron 1 of 1)	1849	NM_001198670	219902	Hs.643516	NM_174926	ENSG00000181264	TMEM136	-	transmembrane protein 136	protein-coding	18.92
chr20-19	chr20	10511625	10511888	Genebody	intron (NM_001009608, intron 2 of 7)	76453	NM_001009608	128710	Hs.668782	NM_001009608	ENSG00000149346	SLX4IP	C20orf94|bA204H22.1|bA254M13.1|dJ1099D15.3	SLX4 interacting protein	protein-coding	18.91
chr12-50	chr12	57522143	57522412	Promoter	promoter-TSS (NM_052897)	-599	NM_052897	114785	Hs.524523	NM_052897	ENSG00000166987	MBD6	-	methyl-CpG binding domain protein 6	protein-coding	18.89
chr22-30	chr22	31159998	31160263	Promoter	promoter-TSS (NR_024212)	-11	NR_037496	100500901		NR_037496	ENSG00000264141	MIR3928	mir-3928	microRNA 3928	ncRNA	18.88
chr11-43	chr11	327163	327432	Intergenic	Intergenic	-6383	NR_049759	10410	Hs.374650	NM_021034	ENSG00000142089	IFITM3	1-8U|DSPA2b|IP15	interferon induced transmembrane protein 3	protein-coding	18.86
chr1-183	chr1	173868035	173868304	Promoter	promoter-TSS (NR_002579)	87	NM_001346115	84614	Hs.668497	NM_032522	ENSG00000185278	ZBTB37	D430004I08Rik|ZNF908	zinc finger and BTB domain containing 37	protein-coding	18.84
chr3-65	chr3	37996843	37997106	Genebody	intron (NM_015873, intron 4 of 18)	3387	NM_015873	50853	Hs.103665	NM_015873	ENSG00000136059	VILL	-	villin like	protein-coding	18.83
chr11-76	chr11	65069337	65069604	Intergenic	Intergenic	-10933	NM_005468	10004	Hs.13967	NM_005468	ENSG00000168060	NAALADL1	I100|NAALADASEL	N-acetylated alpha-linked acidic dipeptidase like 1	protein-coding	18.82
chr14-29	chr14	58427095	58427364	Promoter	promoter-TSS (NM_001329944)	13	NR_130752	26520	Hs.440525	NM_012460	ENSG00000100575	TIMM9	TIM9|TIM9A	translocase of inner mitochondrial membrane 9	protein-coding	18.81
chr3-38	chr3	49007086	49007355	Promoter	promoter-TSS (NM_001320547)	158	NM_018031	11180	Hs.654815	NM_018031	ENSG00000178252	WDR6	-	WD repeat domain 6	protein-coding	18.78
chr8-33	chr8	51962476	51962745	Intergenic	Intergenic	-63424	NM_052937	115294	Hs.671268	NM_052937	ENSG00000168300	PCMTD1	-	protein-L-isoaspartate (D-aspartate) O-methyltransferase domain containing 1	protein-coding	18.78
chr18-12	chr18	23228275	23228544	Genebody	intron (NR_023359, intron 4 of 6)	72584	NM_138375	91768	Hs.11108	NM_138375	ENSG00000134508	CABLES1	CABL1|CABLES|HsT2563|IK3-1	Cdk5 and Abl enzyme substrate 1	protein-coding	18.78
chr5-38	chr5	179818955	179819224	Promoter	intron (NM_001142299, intron 2 of 8)	-1753	NM_003900	8878	Hs.587290	NM_003900	ENSG00000161011	SQSTM1	A170|DMRV|FTDALS3|NADGP|OSIL|PDB3|ZIP3|p60|p62|p62B	sequestosome 1	protein-coding	18.76
chr10-52	chr10	100996727	100996993	Promoter	promoter-TSS (NM_032429)	-206	NM_032429	84445	Hs.523221	NM_032429	ENSG00000107816	LZTS2	LAPSER1	leucine zipper tumor suppressor 2	protein-coding	18.75
chr8-23	chr8	127178657	127178922	Intergenic	Intergenic	18838	NR_120364	103021165	Hs.573407	NR_120364		CASC19	CARLO6|CARLo-6|LINC01245	cancer susceptibility 19 (non-protein coding)	ncRNA	18.74
chr18-14	chr18	24119093	24119362	Genebody	intron (NM_153211, intron 8 of 13)	5874	NM_001292030	125488	Hs.128576	NM_153211	ENSG00000168234	TTC39C	C18orf17|HsT2697	tetratricopeptide repeat domain 39C	protein-coding	18.73
chr1-121	chr1	174999300	174999559	Promoter	promoter-TSS (NM_014412)	-6	NM_001007214	27101	Hs.508524	NM_014412	ENSG00000116161	CACYBP	GIG5|PNAS-107|S100A6BP|SIP	calcyclin binding protein	protein-coding	18.7
chr19-72	chr19	48634393	48634662	Genebody	intron (NM_001352, intron 2 of 3)	3023	NM_001352	1628	Hs.414480	NM_001352	ENSG00000105516	DBP	DABP|taxREB302	D-box binding PAR bZIP transcription factor	protein-coding	18.68
chr12-81	chr12	108268473	108268742	Intergenic	MLT1H2|LTR|ERVL-MaLR	52055	NM_001142345	1240	Hs.197143	NM_004072	ENSG00000174600	CMKLR1	CHEMERINR|ChemR23|DEZ|RVER1	chemerin chemokine-like receptor 1	protein-coding	18.65
chr2-98	chr2	85852149	85852407	Promoter	intron (NM_001354233, intron 3 of 7)	1893	NM_001354248	8869	Hs.415117	NM_003896	ENSG00000115525	ST3GAL5	SATI|SIAT9|SIATGM3S|SPDRS|ST3Gal V|ST3GalV	ST3 beta-galactoside alpha-2,3-sialyltransferase 5	protein-coding	18.63
chr4-34	chr4	37686511	37686776	Promoter	promoter-TSS (NM_001085400)	-266	NM_001085399	768211	Hs.283378	NM_001085399	ENSG00000181826	RELL1	-	RELT like 1	protein-coding	18.63
chr10-42	chr10	102642002	102642271	Intergenic	CpG	-2359	NM_030912	81603	Hs.336810	NM_030912	ENSG00000171206	TRIM8	GERP|RNF27	tripartite motif containing 8	protein-coding	18.62
chr13-18	chr13	46182153	46182422	Promoter	promoter-TSS (NM_002298)	37	NM_002298	3936	Hs.381099	NM_002298	ENSG00000136167	LCP1	CP64|HEL-S-37|L-PLASTIN|LC64P|LPL|PLS2	lymphocyte cytosolic protein 1	protein-coding	18.62
chr5-39	chr5	151749663	151749913	Genebody	intron (NM_004045, intron 2 of 3)	8861	NM_004045	475	Hs.125213	NM_004045	ENSG00000177556	ATOX1	ATX1|HAH1	antioxidant 1 copper chaperone	protein-coding	18.59
chr18-15	chr18	56638744	56639010	Promoter	promoter-TSS (NR_024546)	-188	NR_024546	9352	Hs.114412	NM_004786	ENSG00000091164	TXNL1	HEL-S-114|TRP32|TXL-1|TXNL|Txl	thioredoxin like 1	protein-coding	18.59
chr5-40	chr5	71587112	71587381	Promoter	promoter-TSS (NM_022132)	-42	NM_022132	64087	Hs.604789	NM_022132	ENSG00000131844	MCCC2	MCCB	methylcrotonoyl-CoA carboxylase 2	protein-coding	18.59
chr14-40	chr14	93375853	93376107	Genebody	MSTC|LTR|ERVL-MaLR	28789	NM_182971	341947	Hs.666459	NM_182971	ENSG00000187581	COX8C	COX8-3	cytochrome c oxidase subunit 8C	protein-coding	18.58
chr17-144	chr17	33674743	33675012	Genebody	MIRc|SINE|MIR	-141117	NR_037584	100506677	Hs.652571	NR_037584	ENSG00000265544	AA06	AA02|AA04|AA05	uncharacterized LOC100506677	pseudo	18.54
chr19-73	chr19	6604049	6604314	Intergenic	MLT1J|LTR|ERVL-MaLR	-13029	NM_001330332	970	Hs.501497	NM_001252	ENSG00000125726	CD70	CD27-L|CD27L|CD27LG|TNFSF7|TNLG8A	CD70 molecule	protein-coding	18.52
chr7-28	chr7	2353982	2354251	Promoter	promoter-TSS (NM_003751)	-723	NM_003751	8662	Hs.371001	NM_003751	ENSG00000106263	EIF3B	EIF3-ETA|EIF3-P110|EIF3-P116|EIF3S9|PRT1	eukaryotic translation initiation factor 3 subunit B	protein-coding	18.51
chr9-42	chr9	122093263	122093532	Promoter	exon (NM_001139442, exon 1 of 9)	209	NM_194252	158135	Hs.438937	NM_194252	ENSG00000175764	TTLL11	C9orf20|bA244O19.1	tubulin tyrosine ligase like 11	protein-coding	18.46
chr5-42	chr5	123423807	123424076	Promoter	promoter-TSS (NM_001166226)	-349	NM_001166226	153241	Hs.483209	NM_153223	ENSG00000168944	CEP120	CCDC100|JBTS31|SRTD13	centrosomal protein 120	protein-coding	18.46
chr1-123	chr1	43592983	43593252	Genebody	intron (NM_001329138, intron 14 of 36)	-57009	NM_014663	9682	Hs.155983	NM_014663	ENSG00000066135	KDM4A	JHDM3A|JMJD2|JMJD2A|TDRD14A	lysine demethylase 4A	protein-coding	18.46
chr18-17	chr18	59139645	59139906	Promoter	promoter-TSS (NM_001307941)	-82	NM_033280	90701	Hs.45107	NM_033280	ENSG00000166562	SEC11C	SEC11L3|SPC21|SPCS4C	SEC11 homolog C, signal peptidase complex subunit	protein-coding	18.45
chr3-41	chr3	134485852	134486119	Promoter	promoter-TSS (NM_015391)	4	NM_001242375	25847	Hs.106909	NM_015391	ENSG00000129055	ANAPC13	APC13|SWM1	anaphase promoting complex subunit 13	protein-coding	18.44
chr3-28	chr3	12841559	12841821	Promoter	promoter-TSS (NM_000994)	-108	NM_000994	6161	Hs.265174	NM_000994	ENSG00000144713	RPL32	L32|PP9932	ribosomal protein L32	protein-coding	18.43
chr9-35	chr9	131252606	131252875	Intergenic	MLT1A0|LTR|ERVL-MaLR	23779	NM_033387	286336	Hs.143878	NM_033387	ENSG00000126882	FAM78A	C9orf59	family with sequence similarity 78 member A	protein-coding	18.41
chr20-23	chr20	44979311	44979580	Genebody	intron (NM_006282, intron 3 of 10)	12975	NM_006282	6789	Hs.472838	NM_006282	ENSG00000101109	STK4	KRS2|MST1|YSK3	serine/threonine kinase 4	protein-coding	18.38
chr6-55	chr6	26659601	26659870	Promoter	promoter-TSS (NM_001242798)	17	NM_001242799	79692	Hs.126280	NM_024639	ENSG00000181315	ZNF322	HCG12|ZNF322A|ZNF388|ZNF489	zinc finger protein 322	protein-coding	18.38
chr12-40	chr12	14365849	14366112	Promoter	intron (NM_001286515, intron 1 of 12)	348	NM_018179	55729	Hs.504856	NM_018179	ENSG00000171681	ATF7IP	AM|ATF-IP|MCAF|MCAF1|p621	activating transcription factor 7 interacting protein	protein-coding	18.36
chr16-68	chr16	87388406	87388675	Genebody	intron (NM_001282683, intron 2 of 9)	3567	NM_001282683	79791	Hs.567582	NM_024735	ENSG00000103264	FBXO31	FBX14|FBXO14|Fbx31|MRT45|pp2386	F-box protein 31	protein-coding	18.35
chr10-44	chr10	73849268	73849537	Genebody	intron (NM_172170, intron 5 of 19)	25189	NM_001222	818	Hs.523045	NM_001222	ENSG00000148660	CAMK2G	CAMK|CAMK-II|CAMKG	calcium/calmodulin dependent protein kinase II gamma	protein-coding	18.33
chr17-115	chr17	48456621	48456876	Genebody	intron (NR_110804, intron 5 of 5)	11915	NR_110804	101927166	Hs.149244	NR_110804		LOC101927166	-	uncharacterized LOC101927166	ncRNA	18.31
chr5-37	chr5	143582997	143583266	Intergenic	Intergenic	-96729	NR_049829	100846991		NR_049829	ENSG00000266478	MIR5197	-	microRNA 5197	ncRNA	18.3
chr17-69	chr17	47286166	47286435	Genebody	exon (NM_000212, exon 5 of 15)	32458	NM_000212	3690	Hs.218040	NM_000212	ENSG00000259207	ITGB3	BDPLT16|BDPLT2|CD61|GP3A|GPIIIa|GT	integrin subunit beta 3	protein-coding	18.3
chr7-44	chr7	75399407	75399670	Promoter	intron (NM_198924, intron 2 of 4).2	1396	NM_001317815	378108	Hs.645328	NM_198853	ENSG00000155428	TRIM74	TRIM50C	tripartite motif containing 74	protein-coding	18.28
chr2-108	chr2	11933865	11934133	Intergenic	Intergenic	-73117	NR_110198	100506457	Hs.197824	NR_110196	ENSG00000224184	MIR3681HG	-	MIR3681 host gene	ncRNA	18.26
chr19-48	chr19	18173482	18173751	Promoter	promoter-TSS (NM_006332)	-164	NM_006332	10437	Hs.14623	NM_006332	ENSG00000216490	IFI30	GILT|IFI-30|IP-30|IP30	IFI30, lysosomal thiol reductase	protein-coding	18.25
chr4-49	chr4	87014600	87014863	Genebody	intron (NM_001313960, intron 1 of 17)	7730	NM_005935	4299	Hs.480190	NM_005935	ENSG00000172493	AFF1	AF4|MLLT2|PBM1	AF4/FMR2 family member 1	protein-coding	18.22
chr2-43	chr2	112725915	112726184	Genebody	intron (NM_001350494, intron 13 of 16)	4563	NM_001350494	284958	Hs.589714	NM_001350494	ENSG00000144130	NT5DC4	-	5'-nucleotidase domain containing 4	protein-coding	18.22
chr3-48	chr3	195443223	195443492	Promoter	promoter-TSS (NM_012287)	-269	NM_012287	23527	Hs.593373	NM_012287	ENSG00000114331	ACAP2	CENTB2|CNT-B2	ArfGAP with coiled-coil, ankyrin repeat and PH domains 2	protein-coding	18.22
chr8-36	chr8	71848602	71848864	Genebody	intron (NR_033651, intron 1 of 2)	-4237	NM_005098	9242	Hs.442619	NM_005098	ENSG00000178860	MSC	ABF-1|ABF1|MYOR|bHLHa22	musculin	protein-coding	18.21
chr1-124	chr1	38012412	38012667	Promoter	promoter-TSS (NM_016037)	-173	NM_016037	51118	Hs.472038	NM_016037	ENSG00000183520	UTP11	CGI-94|CGI94|UTP11L	UTP11, small subunit processome component	protein-coding	18.2
chr12-62	chr12	92065075	92065344	Genebody	intron (NR_046160, intron 1 of 5)	76504	NR_046159	256021	Hs.651357	NM_001256373	ENSG00000257242	LINC01619	C12orf79	long intergenic non-protein coding RNA 1619	ncRNA	18.19
chr4-27	chr4	184330104	184330373	Intergenic	Intergenic	23739	NR_040108	728175	Hs.590107	NR_040108	ENSG00000180712	LINC02363	-	long intergenic non-protein coding RNA 2363	ncRNA	18.19
chr6-47	chr6	26195994	26196263	Genebody	TTS (NM_003530)	3165	NM_003530	8351	Hs.532144	NM_003530	ENSG00000197409	HIST1H3D	H3/b|H3FB	histone cluster 1 H3 family member d	protein-coding	18.14
chr19-68	chr19	17932681	17932938	Promoter	promoter-TSS (NM_001136203)	-206	NM_001136203	115098	Hs.100043	NM_138442	ENSG00000007080	CCDC124	-	coiled-coil domain containing 124	protein-coding	18.14
chr10-71	chr10	99994404	99994663	Genebody	intron (NM_015221, intron 1 of 16)	15420	NM_015221	23268	Hs.500771	NM_015221	ENSG00000107554	DNMBP	ARHGEF36|TUBA	dynamin binding protein	protein-coding	18.14
chrX-20	chrX	73851129	73851398	Promoter	non-coding (NR_001564, exon 1 of 6)	1490	NR_001564	7503	Hs.529901	NR_001564	ENSG00000229807	XIST	DXS1089|DXS399E|LINC00001|NCRNA00001|SXI1|swd66	X inactive specific transcript (non-protein coding)	ncRNA	18.11
chr7-60	chr7	38909047	38909314	Promoter	promoter-TSS (NM_080631)	20	NM_080631	27072	Hs.592184	NM_014396	ENSG00000006715	VPS41	HVPS41|HVSP41|hVps41p	VPS41, HOPS complex subunit	protein-coding	18.11
chr22-25	chr22	41947045	41947314	Promoter	promoter-TSS (NM_024053)	-15	NM_001002876	79019	Hs.208912	NM_024053	ENSG00000100162	CENPM	C22orf18|CENP-M|PANE1	centromere protein M	protein-coding	18.11
chr4-36	chr4	120067022	120067291	Promoter	promoter-TSS (NM_002358)	-298	NM_002358	4085	Hs.591697	NM_002358	ENSG00000164109	MAD2L1	HSMAD2|MAD2	mitotic arrest deficient 2 like 1	protein-coding	18.09
chr22-18	chr22	24427390	24427659	Promoter	promoter-TSS (NM_000675)	-38	NM_001278499	135	Hs.197029	NM_000675	ENSG00000128271	ADORA2A	A2aR|ADORA2|RDC8	adenosine A2a receptor	protein-coding	18.09
chr16-77	chr16	72172449	72172718	Promoter	promoter-TSS (NM_001160213)	-133	NM_001160213	83449	Hs.714939	NM_031293	ENSG00000118557	PMFBP1	-	polyamine modulated factor 1 binding protein 1	protein-coding	18.09
chr13-15	chr13	46796445	46796714	Promoter	intron (NM_001984, intron 1 of 9)	653	NM_001984	2098	Hs.432491	NM_001984	ENSG00000139684	ESD	FGH	esterase D	protein-coding	18.09
chr12-55	chr12	4135885	4136140	Intergenic	Intergenic	-137724	NM_001759	894	Hs.376071	NM_001759	ENSG00000118971	CCND2	KIAK0002|MPPH3	cyclin D2	protein-coding	18.06
chr12-47	chr12	62602664	62602933	Promoter	promoter-TSS (NR_029661)	636	NR_121682	283416	Hs.375881	NM_175895	ENSG00000221949	LINC01465	C12orf61	long intergenic non-protein coding RNA 1465	ncRNA	18.06
chr2-46	chr2	177239947	177240216	Genebody	intron (NM_001313903, intron 1 of 4)	15929	NR_036075	100422824		NR_036075	ENSG00000265396	MIR3128	mir-3128	microRNA 3128	ncRNA	18.06
chr16-95	chr16	17364458	17364727	Genebody	intron (NM_022166, intron 1 of 11)	106289	NM_022166	64131	Hs.22907	NM_022166	ENSG00000103489	XYLT1	DBQD2|PXYLT1|XT-I|XT1|XTI|XYLTI|xylT-I	xylosyltransferase 1	protein-coding	18.06
chr6-63	chr6	35727547	35727806	Promoter	intron (NR_027117, intron 9 of 9)	907	NM_001145775	2289	Hs.407190	NM_004117	ENSG00000096060	FKBP5	AIG6|FKBP51|FKBP54|P54|PPIase|Ptg-10	FK506 binding protein 5	protein-coding	18
chr9-34	chr9	123340247	123340511	Intergenic	Intergenic	-15788	NM_173689	286204	Hs.568340	NM_173689	ENSG00000148204	CRB2	FSGS9|VMCKD	crumbs 2, cell polarity complex component	protein-coding	17.99
chr3-82	chr3	112776156	112776425	Intergenic	Intergenic	-26188	NR_149027	100129297	Hs.570655	NR_149026		LOC100129297	-	uncharacterized LOC100129297	ncRNA	17.98
chr20-26	chr20	23366474	23366743	Genebody	intron (NM_001317012, intron 3 of 6)	2245	NM_001317019	64412	Hs.709462	NM_022482	ENSG00000125812	GZF1	JLSM|ZBTB23|ZNF336	GDNF inducible zinc finger protein 1	protein-coding	17.98
chr9-37	chr9	94165804	94166073	Intergenic	CpG	-10019	NR_029476	406881		NR_029476	ENSG00000199165	MIRLET7A1	LET7A1|MIRNLET7A1|let-7a-1	microRNA let-7a-1	ncRNA	17.98
chr2-65	chr2	25417806	25418062	Genebody	MLT1I|LTR|ERVL-MaLR	-75344	NM_175629	1788	Hs.515840	NM_022552	ENSG00000119772	DNMT3A	DNMT3A2|M.HsaIIIA|TBRS	DNA methyltransferase 3 alpha	protein-coding	17.96
chr5-48	chr5	143009252	143009500	Genebody	MIR|SINE|MIR	-140466	NR_046680	100874239	Hs.570896	NR_046680	ENSG00000226272	ARHGAP26-AS1	-	ARHGAP26 antisense RNA 1	ncRNA	17.96
chr17-90	chr17	49747177	49747430	Genebody	intron (NM_030802, intron 1 of 7)	16853	NM_030802	81558	Hs.514308	NM_030802	ENSG00000121104	FAM117A	-	family with sequence similarity 117 member A	protein-coding	17.95
chr14-46	chr14	35416958	35417224	Intergenic	Intergenic	-12337	NM_020529	4792	Hs.81328	NM_020529	ENSG00000100906	NFKBIA	IKBA|MAD-3|NFKBI	NFKB inhibitor alpha	protein-coding	17.94
chr12-43	chr12	57078668	57078934	Promoter	promoter-TSS (NM_015257)	-10	NM_015257	23306	Hs.591040	NM_015257	ENSG00000166881	NEMP1	TMEM194|TMEM194A	nuclear envelope integral membrane protein 1	protein-coding	17.91
chr2-105	chr2	196171479	196171731	Promoter	promoter-TSS (NM_004226)	7	NM_004226	9262	Hs.88297	NM_004226	ENSG00000081320	STK17B	DRAK2	serine/threonine kinase 17b	protein-coding	17.9
chr2-39	chr2	65053252	65053514	Intergenic	ERVL-E-int|LTR|ERVL	-2978	NM_001319100	23177	Hs.709257	NM_015147	ENSG00000011523	CEP68	KIAA0582	centrosomal protein 68	protein-coding	17.88
chr1-139	chr1	179081806	179082075	Promoter	promoter-TSS (NM_022371)	-37	NM_022371	64222	Hs.584957	NM_022371	ENSG00000186283	TOR3A	ADIR|ADIR2	torsin family 3 member A	protein-coding	17.84
chr5-45	chr5	177390461	177390721	Genebody	TTS (NM_001167579)	6160	NM_001167579	6569	Hs.936	NM_003052	ENSG00000131183	SLC34A1	FRTS2|HCINF2|NAPI-3|NPHLOP1|NPT2|NPTIIa|SLC11|SLC17A2	solute carrier family 34 member 1	protein-coding	17.82
chr1-153	chr1	198937360	198937625	Promoter	promoter-TSS (NR_040073)	-63	NR_040073	100131234	Hs.711077	NR_040073		MIR181A1HG	-	MIR181A1 host gene	ncRNA	17.81
chr10-48	chr10	11874753	11875022	Genebody	intron (NR_038222, intron 2 of 5)	19823	NR_038222	219731	Hs.576787	NR_038222	ENSG00000225778	PROSER2-AS1	-	PROSER2 antisense RNA 1	ncRNA	17.79
chr3-56	chr3	58034910	58035177	Genebody	intron (NM_001164317, intron 1 of 46)	26643	NM_001164317	2317	Hs.476448	NM_001457	ENSG00000136068	FLNB	ABP-278|ABP-280|AOI|FH1|FLN-B|FLN1L|LRS1|SCT|TABP|TAP	filamin B	protein-coding	17.79
chr19-70	chr19	57888908	57889170	Promoter	promoter-TSS (NM_001144989)	35	NM_001144989	730051	Hs.634143	NM_001144989	ENSG00000204514	ZNF814	-	zinc finger protein 814	protein-coding	17.77
chr7-48	chr7	44617247	44617494	Genebody	intron (NM_001003941, intron 1 of 8)	10848	NM_001003941	4967	Hs.488181	NM_002541	ENSG00000105953	OGDH	AKGDH|E1k|OGDC	oxoglutarate dehydrogenase	protein-coding	17.77
chr17-97	chr17	17305513	17305773	Genebody	intron (NM_020201, intron 1 of 4)	2277	NM_020201	56953	Hs.513977	NM_020201	ENSG00000205309	NT5M	dNT-2|dNT2|mdN	5',3'-nucleotidase, mitochondrial	protein-coding	17.77
chr10-83	chr10	78029430	78029699	Promoter	promoter-TSS (NM_007055)	-24	NM_007055	11128	Hs.436896	NM_007055	ENSG00000148606	POLR3A	ADDH|HLD7|RPC1|RPC155|hRPC155	RNA polymerase III subunit A	protein-coding	17.76
chr10-56	chr10	45470261	45470511	Genebody	MLT1E2|LTR|ERVL-MaLR	-17265	NR_120674	102724323	Hs.559151	NR_120674	ENSG00000231964	LOC102724323	-	uncharacterized LOC102724323	ncRNA	17.76
chr6-28	chr6	26537559	26537828	Promoter	promoter-TSS (NM_006353)	-651	NM_006353	10473	Hs.236774	NM_006353	ENSG00000182952	HMGN4	HMG17L3|NHC	high mobility group nucleosomal binding domain 4	protein-coding	17.76
chr1-166	chr1	24988178	24988447	Intergenic	MLT1K|LTR|ERVL-MaLR	-23302	NM_001031680	864	Hs.170019	NM_004350	ENSG00000020633	RUNX3	AML2|CBFA3|PEBP2aC	runt related transcription factor 3	protein-coding	17.76
chr12-53	chr12	54324700	54324969	Promoter	promoter-TSS (NM_001271734)	-256	NM_001271736	22818	Hs.505652	NM_016057	ENSG00000111481	COPZ1	CGI-120|COPZ|HSPC181|zeta-COP|zeta1-COP	coatomer protein complex subunit zeta 1	protein-coding	17.76
chr20-18	chr20	53729620	53729878	Intergenic	MLT1H|LTR|ERVL-MaLR	121395	NR_134576	105372672	Hs.259350	NR_134576	ENSG00000235415	LOC105372672	-	uncharacterized LOC105372672	ncRNA	17.71
chr7-128	chr7	156920523	156920786	Intergenic	LTR13A|LTR|ERVK	-27446	NR_146958	64327	Hs.209989	NM_022458	ENSG00000105983	LMBR1	ACHP|C7orf2|DIF14|LSS|PPD2|THYP|TPT|ZRS	limb development membrane protein 1	protein-coding	17.7
chr12-37	chr12	28190217	28190472	Promoter	promoter-TSS (NM_001352084)	-83	NM_001352084	55297	Hs.653125	NM_018318	ENSG00000123106	CCDC91	HSD8|p56	coiled-coil domain containing 91	protein-coding	17.69
chr2-116	chr2	96164837	96165105	Intergenic	Intergenic	-19531	NM_004418	1844	Hs.1183	NM_004418	ENSG00000158050	DUSP2	PAC-1|PAC1	dual specificity phosphatase 2	protein-coding	17.67
chr12-63	chr12	71754695	71754963	Promoter	promoter-TSS (NM_014999)	-34	NM_014999	23011	Hs.524590	NM_014999	ENSG00000080371	RAB21	-	RAB21, member RAS oncogene family	protein-coding	17.67
chr2-36	chr2	37635628	37635894	Intergenic	THE1C|LTR|ERVL-MaLR	36438	NM_001270437	10602	Hs.369574	NM_006449	ENSG00000163171	CDC42EP3	BORG2|CEP3|UB1	CDC42 effector protein 3	protein-coding	17.66
chr6-43	chr6	27145894	27146163	Promoter	TTS (NM_001312653)	830	NM_080593	85236	Hs.437275	NM_080593	ENSG00000197903	HIST1H2BK	H2B/S|H2BFAiii|H2BFT|H2BK	histone cluster 1 H2B family member k	protein-coding	17.63
chr2-84	chr2	159614068	159614337	Promoter	intron (NM_013450, intron 1 of 36)	-1092	NR_110587	643072	Hs.632541	NR_110587		LOC643072	-	uncharacterized LOC643072	ncRNA	17.6
chr6-51	chr6	39609095	39609363	Genebody	intron (NM_145027, intron 6 of 22)	116194	NM_001351503	221458	Hs.588202	NM_145027	ENSG00000164627	KIF6	C6orf102|dJ1043E3.1|dJ137F1.4|dJ188D3.1	kinesin family member 6	protein-coding	17.59
chr22-29	chr22	31646566	31646835	Genebody	intron (NM_001326416, intron 3 of 10)	-8197	NM_178022	23761	Hs.420559	NM_014338	ENSG00000241878	PISD	DJ858B16|PSD|PSDC|PSSC|dJ858B16.2	phosphatidylserine decarboxylase	protein-coding	17.58
chr6-37	chr6	167094959	167095228	Intergenic	Intergenic	-16714	NM_004367	1235	Hs.46468	NM_004367	ENSG00000112486	CCR6	BN-1|C-C CKR-6|CC-CKR-6|CCR-6|CD196|CKR-L3|CKRL3|CMKBR6|DCR2|DRY6|GPR29|GPRCY4|STRL22	C-C motif chemokine receptor 6	protein-coding	17.58
chr12-60	chr12	108633798	108634063	Promoter	promoter-TSS (NM_003006)	-36	NM_003006	6404	Hs.591014	NM_003006	ENSG00000110876	SELPLG	CD162|CLA|PSGL-1|PSGL1	selectin P ligand	protein-coding	17.57
chr6-31	chr6	36594247	36594507	Promoter	promoter-TSS (NR_036610)	64	NM_003017	6428	Hs.405144	NM_003017	ENSG00000112081	SRSF3	SFRS3|SRp20	serine and arginine rich splicing factor 3	protein-coding	17.57
chr1-209	chr1	1065653	1065922	Genebody	LTR13A|LTR|ERVK	6053	NR_148960	100288175	Hs.713286	NR_148960	ENSG00000217801	LOC100288175	-	uncharacterized LOC100288175	ncRNA	17.55
chr8-28	chr8	29229238	29229507	Genebody	MIRb|SINE|MIR	33721	NM_015254	23303	Hs.444767	NM_015254	ENSG00000197892	KIF13B	GAKIN	kinesin family member 13B	protein-coding	17.55
chr17-88	chr17	8196117	8196374	Intergenic	MIR|SINE|MIR	-5999	NM_017622	54785	Hs.129563	NM_017622	ENSG00000196544	BORCS6	C17orf59|PRO2472	BLOC-1 related complex subunit 6	protein-coding	17.53
chr12-84	chr12	46371300	46371569	Promoter	CpG	1428	NM_001307936	54407	Hs.221847	NM_018976	ENSG00000134294	SLC38A2	ATA2|PRO1068|SAT2|SNAT2	solute carrier family 38 member 2	protein-coding	17.52
chr4-51	chr4	142405367	142405636	Genebody	intron (NM_001101669, intron 5 of 25)	441034	NM_001331040	8821	Hs.176376	NM_003866	ENSG00000109452	INPP4B	-	inositol polyphosphate-4-phosphatase type II B	protein-coding	17.52
chr19-85	chr19	1605571	1605840	Promoter	promoter-TSS (NM_006830)	-221	NM_006830	10975	Hs.8372	NM_006830	ENSG00000127540	UQCR11	0710008D09Rik|QCR10|UQCR	ubiquinol-cytochrome c reductase, complex III subunit XI	protein-coding	17.52
chr12-64	chr12	133037296	133037565	Promoter	promoter-TSS (NR_110091)	144	NM_001289971	7637	Hs.445019	NM_003428	ENSG00000198040	ZNF84	HPF2	zinc finger protein 84	protein-coding	17.52
chr8-25	chr8	109522641	109522904	Genebody	exon (NM_177531, exon 75 of 78)	-16928	NM_198120	9166	Hs.409368	NM_004215	ENSG00000147654	EBAG9	EB9|PDAF	estrogen receptor binding site associated, antigen, 9	protein-coding	17.51
chr15-31	chr15	57031735	57032004	Genebody	L1MEf|LINE|L1	112078	NM_001322165	6938	Hs.511504	NM_003205	ENSG00000140262	TCF12	CRS3|HEB|HTF4|HsT17266|TCF-12|bHLHb20|p64	transcription factor 12	protein-coding	17.47
chr16-78	chr16	11572322	11572591	Genebody	(TCACA)n|Simple_repeat|Simple_repeat	13917	NM_004862	9516	Hs.459940	NM_004862	ENSG00000189067	LITAF	PIG7|SIMPLE|TP53I7	lipopolysaccharide induced TNF factor	protein-coding	17.44
chr11-77	chr11	68839267	68839520	Genebody	CpG	2538	NM_001031847	1374	Hs.503043	NM_001876	ENSG00000110090	CPT1A	CPT1|CPT1-L|L-CPT1	carnitine palmitoyltransferase 1A	protein-coding	17.43
chr12-66	chr12	76559755	76560019	Promoter	promoter-TSS (NM_001319653)	-78	NM_020841	114882	Hs.430849	NM_020841	ENSG00000091039	OSBPL8	MST120|MSTP120|ORP8|OSBP10	oxysterol binding protein like 8	protein-coding	17.42
chr2-47	chr2	85595430	85595699	Promoter	promoter-TSS (NM_016494)	-150	NM_016494	51255	Hs.356187	NM_016494	ENSG00000168894	RNF181	HSPC238	ring finger protein 181	protein-coding	17.39
chr22-27	chr22	38181738	38182007	Promoter	promoter-TSS (NM_001349868)	37	NM_001349869	8398	Hs.170479	NM_003560	ENSG00000184381	PLA2G6	CaI-PLA2|GVI|INAD1|IPLA2-VIA|NBIA2|NBIA2A|NBIA2B|PARK14|PLA2|PNPLA9|iPLA2|iPLA2beta	phospholipase A2 group VI	protein-coding	17.39
chr9-36	chr9	67723244	67723508	Intergenic	SST1|Satellite|centr	3367	NR_027422	100133121	Hs.744835	NR_027422		FAM27B	FAM27A2	family with sequence similarity 27 member B	ncRNA	17.36
chr14-34	chr14	50065003	50065272	Genebody	MLT1I|LTR|ERVL-MaLR	39906	NR_131171	196913	Hs.406934	NM_001014830		LINC01599	C14orf183	long intergenic non-protein coding RNA 1599	ncRNA	17.36
chr4-54	chr4	42628400	42628659	Genebody	intron (NM_001105529, intron 1 of 35)	28576	NM_001105529	10396	Hs.435052	NM_006095	ENSG00000124406	ATP8A1	ATPASEII|ATPIA|ATPP2	ATPase phospholipid transporting 8A1	protein-coding	17.33
chr2-81	chr2	221323557	221323823	Intergenic	Intergenic	248668	NM_004438	2043	Hs.371218	NM_004438	ENSG00000116106	EPHA4	HEK8|SEK|TYRO1	EPH receptor A4	protein-coding	17.31
chr7-47	chr7	116971270	116971539	Genebody	intron (NM_018412, intron 1 of 14)	-17070	NR_002330	93653	Hs.597516	NR_002330	ENSG00000227199	ST7-AS1	ST7AS1|ST7OT1	ST7 antisense RNA 1	ncRNA	17.28
chr10-77	chr10	88582792	88583057	Promoter	CpG	401	NM_001031709	55328	Hs.149849	NM_018363	ENSG00000184719	RNLS	C10orf59|RENALASE	renalase, FAD dependent amine oxidase	protein-coding	17.27
chr9-47	chr9	128684379	128684647	Promoter	promoter-TSS (NM_001248000)	-573	NM_001248000	6418	Hs.436687	NM_003011	ENSG00000119335	SET	2PP2A|I2PP2A|IGAAD|IPP2A2|PHAPII|TAF-I|TAF-IBETA	SET nuclear proto-oncogene	protein-coding	17.26
chr1-163	chr1	192609253	192609522	Intergenic	MLT1N2|LTR|ERVL-MaLR	-26751	NM_002927	6003	Hs.497220	NM_002927	ENSG00000127074	RGS13	-	regulator of G protein signaling 13	protein-coding	17.25
chr19-89	chr19	49331637	49331906	Intergenic	MLT1J2|LTR|ERVL-MaLR	-3649	NM_001774	951	Hs.166556	NM_001774	ENSG00000104894	CD37	GP52-40|TSPAN26	CD37 molecule	protein-coding	17.25
chr14-39	chr14	100066253	100066519	Promoter	MIRc|SINE|MIR	972	NM_016337	51466	Hs.125867	NM_016337	ENSG00000196405	EVL	RNB6	Enah/Vasp-like	protein-coding	17.23
chr5-43	chr5	173743931	173744194	Genebody	MIRb|SINE|MIR	2147	NR_108027	101928136	Hs.449267	NR_108027	ENSG00000253686	LINC01484	-	long intergenic non-protein coding RNA 1484	ncRNA	17.21
chr2-60	chr2	110675237	110675506	Genebody	L2a|LINE|L2	2736	NM_001278616	699	Hs.469649	NM_004336	ENSG00000169679	BUB1	BUB1A|BUB1L|hBUB1	BUB1 mitotic checkpoint serine/threonine kinase	protein-coding	17.2
chr12-56	chr12	69161871	69162140	Intergenic	Intergenic	-77532	NM_007007	11052	Hs.369606	NM_007007	ENSG00000111605	CPSF6	CFIM|CFIM68|CFIM72|HPBRII-4|HPBRII-7	cleavage and polyadenylation specific factor 6	protein-coding	17.2
chr17-125	chr17	38700954	38701218	Promoter	Intergenic	1245	NR_039887	100616203		NR_039887	ENSG00000275238	MIR4734	mir-4734	microRNA 4734	ncRNA	17.2
chr2-67	chr2	127830863	127831128	Intergenic	LTR18A|LTR|ERVL	-19808	NM_001006623	55339	Hs.554831	NM_018383	ENSG00000136709	WDR33	NET14|WDC146	WD repeat domain 33	protein-coding	17.19
chr12-46	chr12	113070247	113070509	Genebody	intron (NM_004416, intron 1 of 8)	12521	NM_004416	1840	Hs.372152	NM_004416	ENSG00000135144	DTX1	RNF140|hDx-1	deltex E3 ubiquitin ligase 1	protein-coding	17.19
chr14-31	chr14	73770696	73770959	Genebody	Tigger16a|DNA|TcMar-Tigger	-10529	NM_194278	91748	Hs.594157	NM_194278	ENSG00000156030	ELMSAN1	C14orf117|C14orf43|LSR68|MIDEAS|c14_5541	ELM2 and Myb/SANT domain containing 1	protein-coding	17.18
chr22-38	chr22	50525557	50525826	Promoter	promoter-TSS (NM_005138)	-86	NM_005138	9997	Hs.180903	NM_005138	ENSG00000130489	SCO2	CEMCOX1|MYP6|SCO1L	SCO2, cytochrome c oxidase assembly protein	protein-coding	17.15
chr4-52	chr4	55853524	55853793	Promoter	promoter-TSS (NM_018261)	8	NM_178237	55763	Hs.269665	NM_018261	ENSG00000090989	EXOC1	BM-102|SEC3|SEC3L1|SEC3P	exocyst complex component 1	protein-coding	17.15
chr17-53	chr17	40108168	40108435	Intergenic	Intergenic	-7576	NM_021724	9572	Hs.724	NM_021724	ENSG00000126368	NR1D1	EAR1|REVERBA|REVERBalpha|THRA1|THRAL|ear-1|hRev	nuclear receptor subfamily 1 group D member 1	protein-coding	17.14
chr12-49	chr12	32139045	32139308	Genebody	intron (NM_001714, intron 1 of 9)	32369	NM_001354188	636	Hs.505202	NM_001714	ENSG00000151746	BICD1	BICD	BICD cargo adaptor 1	protein-coding	17.13
chr2-76	chr2	84939607	84939865	Intergenic	Intergenic	-31372	NM_020122	56888	Hs.654968	NM_020122	ENSG00000176407	KCMF1	DEBT91|FIGC|PCMF|ZZZ1	potassium channel modulatory factor 1	protein-coding	17.12
chr4-30	chr4	184584152	184584421	Genebody	non-coding (NR_131967, exon 2 of 2)	40586	NR_131966	105377586	Hs.338354	NR_131965	ENSG00000254233	LINC02365	LVCAT8	long intergenic non-protein coding RNA 2365	ncRNA	17.12
chr11-45	chr11	66222767	66223004	Genebody	intron (NM_018026, intron 10 of 23)	-34409	NM_001134775	64837	Hs.280792	NM_022822	ENSG00000174996	KLC2	-	kinesin light chain 2	protein-coding	17.12
chr14-42	chr14	96362036	96362305	Promoter	intron (NM_018036, intron 1 of 41)	1231	NM_018036	55102	Hs.168241	NM_018036	ENSG00000066739	ATG2B	C14orf103	autophagy related 2B	protein-coding	17.09
chr1-173	chr1	40161220	40161468	Promoter	promoter-TSS (NM_012421)	-25	NM_012421	6018	Hs.205627	NM_012421	ENSG00000117000	RLF	ZN-15L|ZNF292L	rearranged L-myc fusion	protein-coding	17.06
chr1-154	chr1	236156849	236157096	Genebody	intron (NM_003272, intron 1 of 6)	14440	NM_003272	7107	Hs.498160	NM_003272	ENSG00000077585	GPR137B	TM7SF1	G protein-coupled receptor 137B	protein-coding	17.04
chrX-24	chrX	86047386	86047654	Promoter	promoter-TSS (NM_001145414)	45	NM_001145414	1121	Hs.496449	NM_000390	ENSG00000188419	CHM	DXS540|GGTA|HSD-32|REP-1|TCD	CHM, Rab escort protein 1	protein-coding	17.02
chr1-118	chr1	45550751	45551015	Promoter	promoter-TSS (NM_006066)	100	NM_153326	10327	Hs.474584	NM_006066	ENSG00000117448	AKR1A1	ALDR1|ALR|ARM|DD3|HEL-S-6	aldo-keto reductase family 1 member A1	protein-coding	17.01
chr10-79	chr10	22316355	22316617	Promoter	exon (NM_001204062, exon 1 of 14)	103	NM_012071	23412	Hs.534398	NM_012071	ENSG00000148444	COMMD3	BUP|C10orf8	COMM domain containing 3	protein-coding	17
chr22-20	chr22	40492450	40492713	Genebody	intron (NM_020831, intron 3 of 14)	-29141	NM_001282660	57591	Hs.654688	NM_020831	ENSG00000196588	MKL1	BSAC|MAL|MKL|MRTF-A	megakaryoblastic leukemia (translocation) 1	protein-coding	16.99
chr10-58	chr10	110567184	110567449	Promoter	promoter-TSS (NM_005445)	-375	NM_005445	9126	Hs.24485	NM_005445	ENSG00000108055	SMC3	BAM|BMH|CDLS3|CSPG6|HCAP|SMC3L1	structural maintenance of chromosomes 3	protein-coding	16.94
chr18-9	chr18	63192927	63193196	Genebody	intron (NM_000633, intron 2 of 2)	126319	NM_000633	596	Hs.150749	NM_000633	ENSG00000171791	BCL2	Bcl-2|PPP1R50	BCL2, apoptosis regulator	protein-coding	16.9
chr13-29	chr13	27177946	27178215	Genebody	intron (NR_046548, intron 1 of 1)	5821	NR_046548	100874071	Hs.735400	NR_046548		USP12-AS2	-	USP12 antisense RNA 2 (head to head)	ncRNA	16.9
chr16-106	chr16	68844219	68844485	Promoter	MIR3|SINE|MIR	746	NM_024562	79613	Hs.13526	NM_024562	ENSG00000103047	TANGO6	TMCO7	transport and golgi organization 6 homolog	protein-coding	16.88
chr20-21	chr20	62954280	62954549	Promoter	intron (NM_001302643, intron 2 of 13)	1767	NM_001302643	63910	Hs.512686	NM_022082	ENSG00000101194	SLC17A9	C20orf59|POROK8|VNUT	solute carrier family 17 member 9	protein-coding	16.88
chr3-58	chr3	157064450	157064719	Intergenic	Intergenic	-17257	NR_135546	105374177	Hs.634263	NR_135546	ENSG00000241544	LINC02029	-	long intergenic non-protein coding RNA 2029	ncRNA	16.88
chr17-95	chr17	2238557	2238824	Promoter	intron (NM_017575, intron 9 of 18)	-1843	NM_001256828	23293	Hs.448342	NM_017575	ENSG00000070366	SMG6	C17orf31|EST1A|SMG-6|hSMG5/7a	SMG6, nonsense mediated mRNA decay factor	protein-coding	16.87
chr7-67	chr7	17159613	17159848	Intergenic	MIR3|SINE|MIR	-138922	NM_001621	196	Hs.171189	NM_001621	ENSG00000106546	AHR	bHLHe76	aryl hydrocarbon receptor	protein-coding	16.86
chr19-76	chr19	45717302	45717567	Genebody	CpG	-2156	NM_001329632	23403	Hs.128702	NM_001080469	ENSG00000177051	FBXO46	20D7-FC4|FBXO34L|Fbx46	F-box protein 46	protein-coding	16.86
chr7-37	chr7	100369299	100369568	Intergenic	MIRc|SINE|MIR	-4012	NM_178272	29992	Hs.444407	NM_013439	ENSG00000085514	PILRA	FDF03	paired immunoglobin like type 2 receptor alpha	protein-coding	16.85
chr22-45	chr22	30606760	30607016	Promoter	promoter-TSS (NM_000355)	125	NM_001282328	23481	Hs.517543	NM_014303	ENSG00000100029	PES1	NOP7|PES	pescadillo ribosomal biogenesis factor 1	protein-coding	16.83
chr2-164	chr2	37526380	37526649	Intergenic	MLT1J|LTR|ERVL-MaLR	145685	NM_001270437	10602	Hs.369574	NM_006449	ENSG00000163171	CDC42EP3	BORG2|CEP3|UB1	CDC42 effector protein 3	protein-coding	16.82
chr7-43	chr7	72965406	72965675	Promoter	intron (NM_198924, intron 2 of 4)	1413	NM_001317815	378108	Hs.645328	NM_198853	ENSG00000155428	TRIM74	TRIM50C	tripartite motif containing 74	protein-coding	16.8
chr18-20	chr18	3247298	3247567	Promoter	promoter-TSS (NM_006471)	-50	NM_001303048	10627	Hs.190086	NM_006471	ENSG00000101608	MYL12A	HEL-S-24|MLC-2B|MLCB|MRCL3|MRLC3|MYL2B	myosin light chain 12A	protein-coding	16.8
chr14-81	chr14	51419760	51420015	Intergenic	Intergenic	-22752	NR_146549	105370496	Hs.578228	NR_146549	ENSG00000258808	LINC02310	-	long intergenic non-protein coding RNA 2310	ncRNA	16.79
chr16-92	chr16	30445925	30446192	Promoter	promoter-TSS (NM_012248)	-83	NM_012248	22928	Hs.118725	NM_012248	ENSG00000179918	SEPHS2	SPS2	selenophosphate synthetase 2	protein-coding	16.79
chr1-143	chr1	92537072	92537341	Genebody	intron (NM_001350198, intron 19 of 19)	-50330	NM_005263	2672	Hs.73172	NM_005263	ENSG00000162676	GFI1	GFI-1|GFI1A|SCN2|ZNF163	growth factor independent 1 transcriptional repressor	protein-coding	16.77
chr16-93	chr16	10868669	10868938	Intergenic	Intergenic	-8395	NM_001286403	4261	Hs.592051	NM_000246	ENSG00000179583	CIITA	C2TA|CIITAIV|MHC2TA|NLRA	class II major histocompatibility complex transactivator	protein-coding	16.77
chr5-50	chr5	173680696	173680965	Intergenic	Intergenic	-8629	NR_146727	105377736	Hs.582570	NR_146727	ENSG00000253428	LINC01942	-	long intergenic non-protein coding RNA 1942	ncRNA	16.74
chr19-93	chr19	5974934	5975203	Genebody	intron (NM_001300865, intron 1 of 15)	3241	NM_007322	8498	Hs.531752	NM_003624	ENSG00000031823	RANBP3	-	RAN binding protein 3	protein-coding	16.72
chr2-53	chr2	190881957	190882225	Promoter	intron (NM_014905, intron 1 of 17)	1270	NM_014905	2744	Hs.116448	NM_014905	ENSG00000115419	GLS	AAD20|GAC|GAM|GLS1|KGA	glutaminase	protein-coding	16.7
chr12-87	chr12	121626251	121626514	Promoter	promoter-TSS (NM_032790)	-168	NM_032790	84876	Hs.55148	NM_032790		ORAI1	CRACM1|IMD9|ORAT1|TAM2|TMEM142A	ORAI calcium release-activated calcium modulator 1	protein-coding	16.69
chr10-100	chr10	96748155	96748416	Promoter	Intergenic	-1981	NR_026712	728658	Hs.645344	NR_026712	ENSG00000236552	RPL13AP5	RPL13A_8_1086|bA196N24.2	ribosomal protein L13a pseudogene 5	pseudo	16.68
chr11-34	chr11	65856919	65857188	Promoter	CpG	1280	NM_005507	1072	Hs.170622	NM_005507	ENSG00000172757	CFL1	CFL|HEL-S-15|cofilin	cofilin 1	protein-coding	16.66
chr12-38	chr12	56449325	56449594	Promoter	promoter-TSS (NR_138471)	6	NR_138471	8914	Hs.118631	NM_003920	ENSG00000111602	TIMELESS	TIM|TIM1|hTIM	timeless circadian regulator	protein-coding	16.66
chr19-79	chr19	50804945	50805214	Promoter	promoter-TSS (NM_001290152)	-226	NM_001290152	84798	Hs.256301	NM_032712	ENSG00000167747	C19orf48	-	chromosome 19 open reading frame 48	protein-coding	16.64
chr5-46	chr5	91381669	91381938	Promoter	intron (NR_027435, intron 1 of 2)	1456	NR_027435	100129716	Hs.116364	NR_027435	ENSG00000281357	ARRDC3-AS1	-	ARRDC3 antisense RNA 1	ncRNA	16.64
chr12-69	chr12	56316091	56316360	Promoter	TTS (NM_001166279)	123	NM_014255	10330	Hs.8752	NM_014255	ENSG00000257727	CNPY2	HP10390|MSAP|TMEM4|ZSIG9	canopy FGF signaling regulator 2	protein-coding	16.64
chr14-41	chr14	63748815	63749073	Intergenic	LTR9|LTR|ERV1	-20849	NM_030791	81537	Hs.24678	NM_030791	ENSG00000126821	SGPP1	SPPase1	sphingosine-1-phosphate phosphatase 1	protein-coding	16.62
chr16-82	chr16	10870561	10870830	Intergenic	MIRb|SINE|MIR	-6503	NM_001286403	4261	Hs.592051	NM_000246	ENSG00000179583	CIITA	C2TA|CIITAIV|MHC2TA|NLRA	class II major histocompatibility complex transactivator	protein-coding	16.61
chr2-83	chr2	239401458	239401707	Promoter	promoter-TSS (NM_006037)	-138	NR_135576	101928111	Hs.534680	NR_135575	ENSG00000222020	LOC101928111	-	uncharacterized LOC101928111	ncRNA	16.61
chr6-32	chr6	137811408	137811676	Intergenic	Intergenic	-55646	NM_006290	7128	Hs.211600	NM_006290	ENSG00000118503	TNFAIP3	A20|AISBL|OTUD7C|TNFA1P2	TNF alpha induced protein 3	protein-coding	16.59
chr13-16	chr13	108915699	108915968	Genebody	intron (NM_001198950, intron 16 of 34)	251470	NR_047700	100885782	Hs.655942	NR_047700	ENSG00000236242	MYO16-AS1	-	MYO16 antisense RNA 1	ncRNA	16.58
chr21-73	chr21	34030137	34030404	Intergenic	MLT1J2|LTR|ERVL-MaLR	-43253	NM_032476	64968	Hs.302742	NM_032476	ENSG00000243927	MRPS6	C21orf101|MRP-S6|RPMS6|S6mt	mitochondrial ribosomal protein S6	protein-coding	16.57
chr3-59	chr3	195271718	195271987	Promoter	promoter-TSS (NM_152531)	-686	NM_152531	152002	Hs.478741	NM_152531	ENSG00000173950	XXYLT1	C3orf21	xyloside xylosyltransferase 1	protein-coding	16.56
chr2-87	chr2	170141819	170142085	Intergenic	Intergenic	-36193	NM_138995	140469	Hs.671900	NM_138995	ENSG00000071909	MYO3B	-	myosin IIIB	protein-coding	16.55
chr18-11	chr18	63141757	63142026	Genebody	intron (NM_000633, intron 2 of 2)	177489	NM_000633	596	Hs.150749	NM_000633	ENSG00000171791	BCL2	Bcl-2|PPP1R50	BCL2, apoptosis regulator	protein-coding	16.53
chr4-41	chr4	151760879	151761140	Promoter	promoter-TSS (NM_004564)	14	NM_004564	5188	Hs.119316	NM_004564	ENSG00000059691	GATB	HSPC199|PET112|PET112L	glutamyl-tRNA amidotransferase subunit B	protein-coding	16.48
chr6-34	chr6	37566233	37566502	Intergenic	Intergenic	-10945	NR_039669	100616413		NR_039669	ENSG00000263926	MIR4462	-	microRNA 4462	ncRNA	16.48
chr11-87	chr11	19311777	19312046	Intergenic	MIRb|SINE|MIR	-38813	NM_001111018	89797	Hs.64341	NM_145117	ENSG00000166833	NAV2	HELAD1|POMFIL2|RAINB1|STEERIN2|UNC53H2	neuron navigator 2	protein-coding	16.48
chr17-80	chr17	49788437	49788706	Promoter	promoter-TSS (NM_007067)	-48	NM_001199155	11143	Hs.21907	NM_007067	ENSG00000136504	KAT7	HBO1|HBOA|MYST2|ZC2HC7	lysine acetyltransferase 7	protein-coding	16.48
chr2-52	chr2	43221909	43222177	Genebody	TTS (NM_006887)	4563	NM_006887	678	Hs.503093	NM_006887	ENSG00000152518	ZFP36L2	BRF2|ERF-2|ERF2|RNF162C|TIS11D	ZFP36 ring finger protein like 2	protein-coding	16.46
chr14-58	chr14	72196360	72196629	Genebody	intron (NM_001204422, intron 2 of 15)	263456	NM_001204417	9628	Hs.509872	NM_004296	ENSG00000182732	RGS6	GAP|HA117|S914	regulator of G protein signaling 6	protein-coding	16.45
chr9-50	chr9	132944686	132944939	Promoter	promoter-TSS (NM_000368)	-179	NM_001162427	7248	Hs.370854	NM_000368	ENSG00000165699	TSC1	LAM|TSC	TSC complex subunit 1	protein-coding	16.4
chr19-59	chr19	48637647	48637916	Promoter	promoter-TSS (NR_004401)	-231	NM_001352	1628	Hs.414480	NM_001352	ENSG00000105516	DBP	DABP|taxREB302	D-box binding PAR bZIP transcription factor	protein-coding	16.37
chr2-62	chr2	45904232	45904501	Genebody	intron (NM_005400, intron 2 of 14)	252462	NM_005400	5581	Hs.580351	NM_005400	ENSG00000171132	PRKCE	PKCE|nPKC-epsilon	protein kinase C epsilon	protein-coding	16.37
chr2-58	chr2	45610453	45610708	Promoter	intron (NM_018079, intron 1 of 20)	714	NM_018079	55133	Hs.14229	NM_018079	ENSG00000068784	SRBD1	-	S1 RNA binding domain 1	protein-coding	16.36
chr15-33	chr15	64093313	64093562	Promoter	intron (NR_110310, intron 1 of 5)	571	NR_110310	84191	Hs.439548	NM_032231	ENSG00000166797	FAM96A	CIA2A	family with sequence similarity 96 member A	protein-coding	16.35
chr9-33	chr9	37719596	37719865	Genebody	MIRb|SINE|MIR	-34073	NM_001286953	158234	Hs.655614	NM_144964	ENSG00000165275	TRMT10B	RG9MTD3|bA3J10.9	tRNA methyltransferase 10B	protein-coding	16.34
chr1-146	chr1	211985876	211986145	Genebody	MLT1H2|LTR|ERVL-MaLR	-49543	NM_001286229	51514	Hs.656473	NM_016448	ENSG00000143476	DTL	CDT2|DCAF2|L2DTL|RAMP	denticleless E3 ubiquitin protein ligase homolog	protein-coding	16.34
chr10-55	chr10	87929014	87929270	Genebody	MIRb|SINE|MIR	65704	NM_001304717	5728	Hs.500466	NM_000314	ENSG00000171862	PTEN	10q23del|BZS|CWS1|DEC|GLM2|MHAM|MMAC1|PTEN1|PTENbeta|TEP1	phosphatase and tensin homolog	protein-coding	16.3
chr14-50	chr14	75522256	75522525	Promoter	promoter-TSS (NM_006399)	-51	NM_006399	10538	Hs.509964	NM_006399	ENSG00000156127	BATF	B-ATF|BATF1|SFA-2|SFA2	basic leucine zipper ATF-like transcription factor	protein-coding	16.29
chr9-44	chr9	124658220	124658489	Promoter	promoter-TSS (NR_038975)	-82	NR_038975	100379345	Hs.660412	NR_038975	ENSG00000224020	MIR181A2HG	-	MIR181A2 host gene	ncRNA	16.23
chr13-22	chr13	30607974	30608243	Genebody	MLT1F|LTR|ERVL-MaLR	9489	NM_001313893	3146	Hs.434102	NM_002128	ENSG00000189403	HMGB1	HMG-1|HMG1|HMG3|SBP-1	high mobility group box 1	protein-coding	16.23
chr14-32	chr14	60248209	60248475	Promoter	promoter-TSS (NM_021003)	-906	NM_177951	5494	Hs.130036	NM_021003	ENSG00000100614	PPM1A	PP2C-ALPHA|PP2CA|PP2Calpha	protein phosphatase, Mg2+/Mn2+ dependent 1A	protein-coding	16.23
chr20-28	chr20	48788782	48789048	Genebody	MSTC|LTR|ERVL-MaLR	38968	NM_020820	57580	Hs.153310	NM_020820	ENSG00000124126	PREX1	P-REX1	phosphatidylinositol-3,4,5-trisphosphate dependent Rac exchange factor 1	protein-coding	16.2
chr1-116	chr1	198159295	198159561	Genebody	intron (NM_133494, intron 1 of 9)	2450	NM_133494	140609	Hs.24119	NM_133494	ENSG00000151414	NEK7	-	NIMA related kinase 7	protein-coding	16.2
chr11-33	chr11	1521841	1522110	Intergenic	Intergenic	-35196	NM_001172223	81532	Hs.370360	NM_053005	ENSG00000182208	MOB2	HCCA2	MOB kinase activator 2	protein-coding	16.18
chr7-46	chr7	22872488	22872754	Intergenic	Intergenic	16008	NR_003075	692210		NR_003075	ENSG00000221740	SNORD93	HBII-336	small nucleolar RNA, C/D box 93	snoRNA	16.17
chr15-32	chr15	39623657	39623917	Genebody	MLT1M|LTR|ERVL-MaLR	42708	NM_003246	7057	Hs.164226	NM_003246	ENSG00000137801	THBS1	THBS|THBS-1|TSP|TSP-1|TSP1	thrombospondin 1	protein-coding	16.13
chr6-39	chr6	36599768	36600037	Genebody	non-coding (NR_036610, exon 4 of 7)	5589	NM_003017	6428	Hs.405144	NM_003017	ENSG00000112081	SRSF3	SFRS3|SRp20	serine and arginine rich splicing factor 3	protein-coding	16.13
chr10-47	chr10	49539056	49539325	Promoter	promoter-TSS (NM_000124)	-67	NM_001277058	2074	Hs.49063	NM_000124	ENSG00000225830	ERCC6	ARMD5|CKN2|COFS|COFS1|CSB|CSB-PGBD3|POF11|RAD26|UVSS1	ERCC excision repair 6, chromatin remodeling factor	protein-coding	16.1
chr7-38	chr7	151349918	151350182	Genebody	LTR13|LTR|ERVK	8289	NM_001243351	51667	Hs.647082	NM_016118	ENSG00000013374	NUB1	BS4|NUB1L|NYREN18	negative regulator of ubiquitin like proteins 1	protein-coding	16.08
chr2-56	chr2	119339297	119339562	Genebody	intron (NM_001017927, intron 3 of 6)	27313	NM_001322330	130355	Hs.99488	NM_001017927	ENSG00000186132	C2orf76	AIM29	chromosome 2 open reading frame 76	protein-coding	16.07
chr11-40	chr11	121569666	121569935	Genebody	MER11C|LTR|ERVK	117597	NM_003105	6653	Hs.368592	NM_003105	ENSG00000137642	SORL1	C11orf32|LR11|LRP9|SORLA|SorLA-1|gp250	sortilin related receptor 1	protein-coding	16.07
chr6-62	chr6	11236352	11236613	Genebody	intron (NM_001142393, intron 2 of 7)	-3800	NM_182966	4739	Hs.37982	NM_006403	ENSG00000111859	NEDD9	CAS-L|CAS2|CASL|CASS2|HEF1	neural precursor cell expressed, developmentally down-regulated 9	protein-coding	16.07
chr2-75	chr2	215311887	215312156	Promoter	promoter-TSS (NM_004044)	65	NM_004044	471	Hs.90280	NM_004044	ENSG00000138363	ATIC	AICAR|AICARFT|HEL-S-70p|IMPCHASE|PURH	5-aminoimidazole-4-carboxamide ribonucleotide formyltransferase/IMP cyclohydrolase	protein-coding	16.05
chr1-137	chr1	52703292	52703552	Intergenic	Intergenic	-5056	NM_023077	65260	Hs.349905	NM_023077	ENSG00000162377	COA7	C1orf163|RESA1|SELRC1	cytochrome c oxidase assembly factor 7 (putative)	protein-coding	16.05
chr2-66	chr2	230416428	230416697	Promoter	promoter-TSS (NM_001206704)	-194	NM_001206704	6672	Hs.369056	NM_003113	ENSG00000067066	SP100	lysp100b	SP100 nuclear antigen	protein-coding	16.05
chr1-138	chr1	114716696	114716965	Promoter	promoter-TSS (NM_002524)	64	NM_002524	4893	Hs.486502	NM_002524	ENSG00000213281	NRAS	ALPS4|CMNS|N-ras|NCMS|NRAS1|NS6	NRAS proto-oncogene, GTPase	protein-coding	15.99
chr19-67	chr19	7943899	7944132	Promoter	promoter-TSS (NM_006351)	-192	NM_006351	10469	Hs.465784	NM_006351	ENSG00000104980	TIMM44	TIM44	translocase of inner mitochondrial membrane 44	protein-coding	15.98
chr1-145	chr1	35031674	35031943	Promoter	CpG	160	NM_007167	9204	Hs.533986	NM_007167	ENSG00000163867	ZMYM6	Buster2|MYM|ZBED7|ZNF198L4|ZNF258	zinc finger MYM-type containing 6	protein-coding	15.97
chr3-45	chr3	9653666	9653935	Genebody	intron (NM_001077525, intron 2 of 18)	4367	NM_001077526	64419	Hs.475382	NM_022485	ENSG00000163719	MTMR14	C3orf29	myotubularin related protein 14	protein-coding	15.94
chr1-168	chr1	203861451	203861716	Promoter	promoter-TSS (NR_130746)	-2	NM_003094	6635	Hs.334612	NM_003094	ENSG00000182004	SNRPE	HYPT11|SME|Sm-E|snRNP-E	small nuclear ribonucleoprotein polypeptide E	protein-coding	15.93
chr8-37	chr8	94262380	94262640	Promoter	promoter-TSS (NM_005261)	-191	NM_181702	2669	Hs.654463	NM_005261	ENSG00000164949	GEM	KIR	GTP binding protein overexpressed in skeletal muscle	protein-coding	15.88
chr16-64	chr16	48458323	48458592	Intergenic	L1ME3A|LINE|L1	-73139	NM_003031	6477	Hs.706828	NM_003031	ENSG00000196470	SIAH1	SIAH1A	siah E3 ubiquitin protein ligase 1	protein-coding	15.88
chr14-57	chr14	102524671	102524940	Intergenic	MLT1M|LTR|ERVL-MaLR	-14839	NR_036192	100422954		NR_036192	ENSG00000266015	MIR4309	-	microRNA 4309	ncRNA	15.88
chr7-71	chr7	43734715	43734977	Intergenic	LTR13A|LTR|ERVK	-5305	NM_001350924	55744	Hs.268887	NM_018224	ENSG00000106603	COA1	C7orf44|MITRAC15	cytochrome c oxidase assembly factor 1 homolog	protein-coding	15.87
chr5-73	chr5	151211709	151211978	Genebody	MER5A|DNA|hAT-Charlie	12250	NM_015621	26112	Hs.655336	NM_015621	ENSG00000198624	CCDC69	-	coiled-coil domain containing 69	protein-coding	15.86
chr7-54	chr7	41881686	41881873	Intergenic	Arthur1B|DNA|hAT-Tip100	-178671	NM_002192	3624	Hs.28792	NM_002192	ENSG00000122641	INHBA	EDF|FRP	inhibin subunit beta A	protein-coding	15.86
chr18-22	chr18	35041162	35041431	Promoter	promoter-TSS (NR_046177)	-64	NM_001256420	10982	Hs.532824	NM_014268	ENSG00000166974	MAPRE2	CSCSC2|EB1|EB2|RP1	microtubule associated protein RP/EB family member 2	protein-coding	15.86
chr11-56	chr11	58579579	58579848	Promoter	CpG	599	NM_053023	80829	Hs.524920	NM_053023	ENSG00000186660	ZFP91	DMS-8|DSM-8|FKSG11|PZF|ZFP-91|ZNF757	ZFP91 zinc finger protein	protein-coding	15.86
chr5-87	chr5	50711297	50711536	Genebody	MLT1L|LTR|ERVL-MaLR	43870	NM_001331028	79668	Hs.369581	NM_024615	ENSG00000151883	PARP8	ARTD16|pART16	poly(ADP-ribose) polymerase family member 8	protein-coding	15.86
chr20-33	chr20	5056997	5057253	Intergenic	LTR16A1|LTR|ERVL	-46832	NM_203327	9962	Hs.516866	NM_005116	ENSG00000089057	SLC23A2	NBTL1|SLC23A1|SVCT2|YSPL2	solute carrier family 23 member 2	protein-coding	15.85
chr12-86	chr12	121918369	121918632	Promoter	promoter-TSS (NM_001178003)	-57	NM_001178003	144406	Hs.709837	NM_144668	ENSG00000158023	WDR66	CFAP251|CaM-IP4	WD repeat domain 66	protein-coding	15.84
chr12-61	chr12	31728350	31728619	Promoter	MIR|SINE|MIR	690	NR_103522	196394	Hs.585084	NM_001113402	ENSG00000151743	AMN1	-	antagonist of mitotic exit network 1 homolog	protein-coding	15.83
chr7-32	chr7	100119325	100119594	Promoter	promoter-TSS (NM_152755)	-61	NM_139315	6878	Hs.489309	NM_005641	ENSG00000106290	TAF6	ALYUS|MGC:8964|TAF(II)70|TAF(II)80|TAF2E|TAFII-70|TAFII-80|TAFII70|TAFII80|TAFII85	TATA-box binding protein associated factor 6	protein-coding	15.8
chr5-78	chr5	6633003	6633272	Promoter	promoter-TSS (NM_001047)	-185	NM_001047	6715	Hs.552	NM_001047	ENSG00000145545	SRD5A1	S5AR 1	steroid 5 alpha-reductase 1	protein-coding	15.8
chr8-32	chr8	42293221	42293490	Genebody	intron (NM_001190720, intron 3 of 20)	22053	NR_033818	3551	Hs.597664	NM_001556	ENSG00000104365	IKBKB	IKK-beta|IKK2|IKKB|IMD15|NFKBIKB	inhibitor of nuclear factor kappa B kinase subunit beta	protein-coding	15.78
chr5-81	chr5	124649616	124649828	Genebody	intron (NM_020747, intron 2 of 8)	95390	NM_020747	57507	Hs.266616	NM_020747	ENSG00000168916	ZNF608	NY-REN-36	zinc finger protein 608	protein-coding	15.76
chr17-89	chr17	42677096	42677352	Promoter	promoter-TSS (NM_024927)	-194	NM_024927	79990	Hs.632251	NM_024927	ENSG00000068137	PLEKHH3	-	pleckstrin homology, MyTH4 and FERM domain containing H3	protein-coding	15.76
chr6-70	chr6	7590009	7590272	Promoter	promoter-TSS (NM_152551)	-59	NM_152551	154007	Hs.13366	NM_152551	ENSG00000168566	SNRNP48	C6orf151|dJ336K20B.1|dJ512B11.2	small nuclear ribonucleoprotein U11/U12 subunit 48	protein-coding	15.73
chr16-76	chr16	75565080	75565347	Promoter	Intergenic	-1138	NM_007285	11345	Hs.461379	NM_007285	ENSG00000034713	GABARAPL2	ATG8|ATG8C|GATE-16|GATE16|GEF-2|GEF2	GABA type A receptor associated protein like 2	protein-coding	15.71
chr1-156	chr1	32650772	32651034	Promoter	promoter-TSS (NM_005610)	-245	NM_001135255	5928	Hs.16003	NM_005610	ENSG00000162521	RBBP4	NURF55|RBAP48|lin-53	RB binding protein 4, chromatin remodeling factor	protein-coding	15.7
chr3-54	chr3	187745568	187745825	Promoter	promoter-TSS (NM_001706)	29	NM_001706	604	Hs.478588	NM_001706	ENSG00000113916	BCL6	BCL5|BCL6A|LAZ3|ZBTB27|ZNF51	B cell CLL/lymphoma 6	protein-coding	15.7
chr13-35	chr13	99432074	99432330	Intergenic	Intergenic	67104	NR_110731	102725509	Hs.648968	NR_110731		LINC01232	TCONS_00021520	long intergenic non-protein coding RNA 1232	ncRNA	15.7
chr20-60	chr20	36050997	36051262	Promoter	promoter-TSS (NR_027451)	-169	NR_027451	647979	Hs.743232	NR_027451	ENSG00000260032	NORAD	LINC00657	non-coding RNA activated by DNA damage	ncRNA	15.69
chr9-46	chr9	33264008	33264277	Promoter	promoter-TSS (NM_016410)	619	NM_004323	573	Hs.377484	NM_004323	ENSG00000107262	BAG1	BAG-1|HAP|RAP46	BCL2 associated athanogene 1	protein-coding	15.67
chr1-129	chr1	30745787	30746056	Genebody	MIRb|SINE|MIR	-6689	NR_039616	100616164		NR_039616	ENSG00000264773	MIR4420	mir-4420	microRNA 4420	ncRNA	15.67
chr16-89	chr16	75380297	75380566	Genebody	L1MEd|LINE|L1	53058	NM_006324	10428	Hs.461361	NM_006324	ENSG00000153774	CFDP1	BCNT|BUCENTAUR|CENP-29|CP27|SWC5|Yeti|p97	craniofacial development protein 1	protein-coding	15.67
chr19-78	chr19	47256382	47256651	Promoter	promoter-TSS (NM_015603)	42	NM_015603	26093	Hs.227782	NM_015603	ENSG00000105321	CCDC9	-	coiled-coil domain containing 9	protein-coding	15.67
chr6-35	chr6	132511196	132511465	Promoter	L2a|LINE|L2	1465	NM_001326578	8417	Hs.593148	NM_003569	ENSG00000079950	STX7	-	syntaxin 7	protein-coding	15.67
chr1-151	chr1	160743336	160743605	Genebody	intron (NM_001282590, intron 1 of 5)	4413	NM_001282595	57823	Hs.517265	NM_021181	ENSG00000026751	SLAMF7	19A|CD319|CRACC|CS1	SLAM family member 7	protein-coding	15.67
chr6-52	chr6	152302294	152302556	Genebody	intron (NM_182961, intron 91 of 145)	-78105	NR_120501	100505475	Hs.571203	NR_120501		SYNE1-AS1	-	SYNE1 antisense RNA 1	ncRNA	15.65
chr6-48	chr6	27761425	27761690	Promoter	promoter-TSS (NR_038929)	-187	NR_038929	100131289	Hs.200573	NR_038929		LOC100131289	-	uncharacterized LOC100131289	ncRNA	15.63
chr19-107	chr19	55116237	55116506	Promoter	intron (NM_017607, intron 1 of 21)	1229	NM_017607	54776	Hs.631579	NM_017607	ENSG00000125503	PPP1R12C	AAVS1|LENG3|MBS85|p84|p85	protein phosphatase 1 regulatory subunit 12C	protein-coding	15.62
chr17-81	chr17	32559382	32559646	Genebody	MER57B2|LTR|ERV1	72427	NM_003885	8851	Hs.500015	NM_003885	ENSG00000176749	CDK5R1	CDK5P35|CDK5R|NCK5A|p23|p25|p35|p35nck5a	cyclin dependent kinase 5 regulatory subunit 1	protein-coding	15.61
chr1-215	chr1	158285762	158286027	Intergenic	Intergenic	-3879	NM_001765	911	Hs.132448	NM_001765	ENSG00000158481	CD1C	BDCA1|CD1|CD1A|R7	CD1c molecule	protein-coding	15.61
chr22-24	chr22	38180992	38181252	Promoter	intron (NM_001349869, intron 1 of 16)	708	NM_001349865	8398	Hs.170479	NM_003560	ENSG00000184381	PLA2G6	CaI-PLA2|GVI|INAD1|IPLA2-VIA|NBIA2|NBIA2A|NBIA2B|PARK14|PLA2|PNPLA9|iPLA2|iPLA2beta	phospholipase A2 group VI	protein-coding	15.6
chr5-68	chr5	140564559	140564810	Promoter	promoter-TSS (NM_006051)	-80	NM_006051	10307	Hs.529449	NM_006051	ENSG00000113108	APBB3	FE65L2|SRA	amyloid beta precursor protein binding family B member 3	protein-coding	15.59
chr4-45	chr4	781758	782027	Promoter	promoter-TSS (NR_036511)	-44	NR_036512	100129917	Hs.731755	NR_036511	ENSG00000249592	LOC100129917	-	uncharacterized LOC100129917	ncRNA	15.59
chr11-36	chr11	60455638	60455907	Promoter	promoter-TSS (NM_152866)	-37	NM_152866	931	Hs.712553	NM_021950	ENSG00000156738	MS4A1	B1|Bp35|CD20|CVID5|LEU-16|MS4A2|S7	membrane spanning 4-domains A1	protein-coding	15.56
chr4-37	chr4	158805565	158805816	Promoter	promoter-TSS (NM_001323916)	-404	NM_001323916	57600	Hs.652441	NM_020840	ENSG00000052795	FNIP2	FNIPL|MAPO1	folliculin interacting protein 2	protein-coding	15.56
chr12-103	chr12	113358399	113358668	Promoter	promoter-TSS (NM_173542)	-33	NM_173542	196463	Hs.115896	NM_173542	ENSG00000151176	PLBD2	P76	phospholipase B domain containing 2	protein-coding	15.56
chr1-189	chr1	18452629	18452887	Intergenic	MLT1I|LTR|ERVL-MaLR	-28172	NM_152375	127707	Hs.406913	NM_152375	ENSG00000179023	KLHDC7A	-	kelch domain containing 7A	protein-coding	15.55
chr6-38	chr6	10694745	10694984	Promoter	promoter-TSS (NM_001145020)	-67	NM_001354357	347744	Hs.61389	NM_001145020	ENSG00000137434	C6orf52	-	chromosome 6 open reading frame 52	protein-coding	15.52
chr8-52	chr8	42767798	42768067	Promoter	intron (NM_001199279, intron 1 of 4)	854	NM_004198	8973	Hs.103128	NM_004198	ENSG00000147434	CHRNA6	CHNRA6	cholinergic receptor nicotinic alpha 6 subunit	protein-coding	15.51
chr6-61	chr6	36423290	36423559	Genebody	CpG	-19343	NR_104480	222658	Hs.188757	NM_173562	ENSG00000112078	KCTD20	C6orf69|dJ108K11.3	potassium channel tetramerization domain containing 20	protein-coding	15.51
chr17-78	chr17	82448646	82448851	Promoter	TTS (NR_036519)	978	NM_001193655	79415	Hs.163113	NM_001033046	ENSG00000178927	CYBC1	C17orf62|Eros	cytochrome b-245 chaperone 1	protein-coding	15.49
chr6-112	chr6	136822385	136822640	Promoter	promoter-TSS (NM_000288)	-52	NM_000288	5191	Hs.280932	NM_000288	ENSG00000112357	PEX7	PBD9B|PTS2R|RCDP1|RD	peroxisomal biogenesis factor 7	protein-coding	15.48
chrX-25	chrX	119565326	119565591	Promoter	promoter-TSS (NM_001170569)	-24	NM_001170570	63932	Hs.248572	NM_022101	ENSG00000018610	CXorf56	-	chromosome X open reading frame 56	protein-coding	15.47
chr3-72	chr3	195637506	195637769	Intergenic	Intergenic	14522	NR_136185	105374297	Hs.655175	NR_136185		LOC105374297	-	uncharacterized LOC105374297	ncRNA	15.45
chr3-55	chr3	58521094	58521363	Genebody	(GTG)n|Simple_repeat|Simple_repeat	15974	NM_003500	8309	Hs.444959	NM_003500	ENSG00000168306	ACOX2	BCOX|BRCACOX|BRCOX|CBAS6|THCCox	acyl-CoA oxidase 2	protein-coding	15.43
chr22-40	chr22	41998552	41998821	Promoter	promoter-TSS (NM_152613)	-39	NM_152613	164684	Hs.655541	NM_152613	ENSG00000183066	WBP2NL	GRAMD7|PAWP	WBP2 N-terminal like	protein-coding	15.43
chr17-87	chr17	2266889	2267142	Promoter	promoter-TSS (NM_001256827)	-816	NM_001256827	23293	Hs.448342	NM_017575	ENSG00000070366	SMG6	C17orf31|EST1A|SMG-6|hSMG5/7a	SMG6, nonsense mediated mRNA decay factor	protein-coding	15.41
chr16-91	chr16	23641198	23641466	Promoter	promoter-TSS (NR_037573)	25	NM_024675	79728	Hs.444664	NM_024675	ENSG00000083093	PALB2	FANCN|PNCA3	partner and localizer of BRCA2	protein-coding	15.41
chr15-30	chr15	85413467	85413727	Genebody	intron (NM_007200, intron 1 of 36)	32981	NM_007200	11214	Hs.459211	NM_006738	ENSG00000170776	AKAP13	AKAP-13|AKAP-Lbc|ARHGEF13|BRX|HA-3|Ht31|LBC|PRKA13|PROTO-LB|PROTO-LBC|c-lbc|p47	A-kinase anchoring protein 13	protein-coding	15.41
chr6-41	chr6	156791243	156791512	Genebody	intron (NM_020732, intron 1 of 19)	-11646	NR_039676	100616154		NR_039676	ENSG00000271899	MIR4466	mir-4466	microRNA 4466	ncRNA	15.4
chr14-33	chr14	24114899	24115168	Promoter	promoter-TSS (NR_028100)	-19	NM_001354770	4901	Hs.652297	NM_006177	ENSG00000129535	NRL	D14S46E|NRL-MAF|RP27	neural retina leucine zipper	protein-coding	15.4
chr6-58	chr6	31568697	31568960	Genebody	intron (NR_149045, intron 1 of 1)	-3271	NM_001159740	4049	Hs.36	NM_000595	ENSG00000226979	LTA	LT|TNFB|TNFSF1|TNLG1E	lymphotoxin alpha	protein-coding	15.37
chr19-103	chr19	12574092	12574361	Intergenic	MSTA1|LTR|ERVL-MaLR	-22684	NM_144976	163050	Hs.655615	NM_144976	ENSG00000249709	ZNF564	-	zinc finger protein 564	protein-coding	15.35
chr14-53	chr14	59276293	59276560	Genebody	intron (NM_014992, intron 1 of 24)	12985	NM_014992	23002	Hs.19156	NM_014992	ENSG00000100592	DAAM1	-	dishevelled associated activator of morphogenesis 1	protein-coding	15.33
chr11-57	chr11	64900288	64900546	Promoter	L2a|LINE|L2	-1980	NR_106808	102466192		NR_106808	ENSG00000274986	MIR6750	hsa-mir-6750	microRNA 6750	ncRNA	15.3
chr1-221	chr1	12153338	12153607	Intergenic	Intergenic	-13471	NR_107000	102465836		NR_107000	ENSG00000283789	MIR7846	hsa-mir-7846	microRNA 7846	ncRNA	15.27
chr6-40	chr6	149481767	149482036	Genebody	intron (NM_207360, intron 1 of 5)	3111	NM_207360	340152	Hs.632618	NM_207360	ENSG00000178199	ZC3H12D	C6orf95|MCPIP4|TFL|dJ281H8.1|p34	zinc finger CCCH-type containing 12D	protein-coding	15.24
chr2-72	chr2	213147597	213147865	Genebody	exon (NM_016260, exon 3 of 8)	2603	NM_016260	22807	Hs.604950	NM_016260	ENSG00000030419	IKZF2	ANF1A2|HELIOS|ZNF1A2|ZNFN1A2	IKAROS family zinc finger 2	protein-coding	15.24
chr2-110	chr2	144267269	144267538	Genebody	intron (NM_001354354, intron 1 of 12)	-18704	NR_148872	79712	Hs.44780	NM_024659	ENSG00000121964	GTDC1	Hmat-Xa|mat-Xa	glycosyltransferase like domain containing 1	protein-coding	15.24
chr10-85	chr10	70982528	70982781	Intergenic	Intergenic	43601	NR_134314	105378349	Hs.119164	NR_134313	ENSG00000259267	LOC105378349	-	uncharacterized LOC105378349	ncRNA	15.23
chr14-55	chr14	95662981	95663249	Genebody	MER4C|LTR|ERV1	11018	NR_152604	27004	Hs.510368	NM_012468		TCL6	TNG1|TNG2	T cell leukemia/lymphoma 6 (non-protein coding)	ncRNA	15.22
chr8-40	chr8	119648470	119648719	Genebody	intron (NM_001330600, intron 1 of 25)	-9728	NM_006209	5168	Hs.190977	NM_006209	ENSG00000136960	ENPP2	ATX|ATX-X|AUTOTAXIN|LysoPLD|NPP2|PD-IALPHA|PDNP2	ectonucleotide pyrophosphatase/phosphodiesterase 2	protein-coding	15.22
chr16-88	chr16	56932982	56933225	Promoter	intron (NM_001010989, intron 1 of 7)	1013	NM_001272103	9709	Hs.146393	NM_014685	ENSG00000051108	HERPUD1	HERP|Mif1|SUP	homocysteine inducible ER protein with ubiquitin like domain 1	protein-coding	15.21
chr14-37	chr14	77800240	77800509	Promoter	CpG	291	NM_001142545	57143	Hs.413208	NM_020421	ENSG00000063761	ADCK1	-	aarF domain containing kinase 1	protein-coding	15.19
chr8-26	chr8	27774172	27774434	Promoter	promoter-TSS (NM_001017420)	-238	NM_001017420	157570	Hs.99480	NM_001017420	ENSG00000171320	ESCO2	2410004I17Rik|EFO2|RBS	establishment of sister chromatid cohesion N-acetyltransferase 2	protein-coding	15.18
chr14-52	chr14	87993080	87993342	Promoter	promoter-TSS (NM_000153)	60	NM_000153	2581	Hs.513439	NM_000153	ENSG00000054983	GALC	-	galactosylceramidase	protein-coding	15.18
chr15-27	chr15	100601183	100601452	Promoter	MSTC|LTR|ERVL-MaLR	923	NR_148017	55180	Hs.105633	NM_018148	ENSG00000140471	LINS1	LINS|MRT27|WINS1	lines homolog 1	protein-coding	15.16
chr1-193	chr1	12044678	12044947	Intergenic	Intergenic	15654	NR_106787	102466982		NR_106787	ENSG00000276869	MIR6729	hsa-mir-6729	microRNA 6729	ncRNA	15.16
chr16-105	chr16	22192265	22192501	Intergenic	Intergenic	-13888	NM_013302	29904	Hs.498892	NM_013302	ENSG00000103319	EEF2K	HSU93850|eEF-2K	eukaryotic elongation factor 2 kinase	protein-coding	15.14
chr11-136	chr11	574245	574502	Promoter	non-coding (NR_026967, exon 1 of 1)	1512	NR_026967	143666	Hs.337054	NR_026967		LOC143666	-	uncharacterized LOC143666	ncRNA	15.14
chr3-60	chr3	49939808	49940075	Promoter	promoter-TSS (NM_005777)	-103	NM_001349194	10180	Hs.696735	NM_005777	ENSG00000004534	RBM6	3G2|DEF-3|DEF3|HLC-11|NY-LU-12|g16	RNA binding motif protein 6	protein-coding	15.14
chr20-20	chr20	63635811	63636079	Intergenic	MLT1A1|LTR|ERVL-MaLR	8710	NR_132418	100505771	Hs.448392	NR_132417	ENSG00000232442	MHENCR	-	melanoma highly expressed competing endogenous lncRNA for miR-425 and miR-489	ncRNA	15.14
chr11-48	chr11	85628513	85628762	Promoter	promoter-TSS (NM_018480)	64	NM_001350393	55863	Hs.525063	NM_018480	ENSG00000171204	TMEM126B	HT007	transmembrane protein 126B	protein-coding	15.13
chr10-99	chr10	72355052	72355315	Promoter	promoter-TSS (NM_017626)	-34	NM_017626	54788	Hs.500013	NM_017626	ENSG00000148719	DNAJB12	DJ10	DnaJ heat shock protein family (Hsp40) member B12	protein-coding	15.12
chr3-67	chr3	13040423	13040666	Genebody	intron (NM_001134382, intron 1 of 13)	32573	NM_001134382	9922	Hs.475506	NM_014869	ENSG00000144711	IQSEC1	ARF-GEP100|ARFGEP100|BRAG2|GEP100	IQ motif and Sec7 domain 1	protein-coding	15.12
chr7-53	chr7	139118991	139119260	Intergenic	MLT1F|LTR|ERVL-MaLR	-9406	NM_020119	56829	Hs.133512	NM_020119	ENSG00000105939	ZC3HAV1	ARTD13|FLB6421|PARP13|ZAP|ZC3H2|ZC3HDC2	zinc finger CCCH-type containing, antiviral 1	protein-coding	15.11
chr1-194	chr1	45012018	45012287	Promoter	promoter-TSS (NM_024602)	19	NR_036510	7389	Hs.78601	NM_000374	ENSG00000126088	UROD	PCT|UPD	uroporphyrinogen decarboxylase	protein-coding	15.11
chr18-16	chr18	23452984	23453253	Promoter	promoter-TSS (NM_001348193)	-103	NR_145477	8780	Hs.445511	NM_003831	ENSG00000101782	RIOK3	SUDD	RIO kinase 3	protein-coding	15.08
chr10-62	chr10	89333043	89333304	Promoter	intron (NM_001031683, intron 1 of 1)	694	NM_001289759	3437	Hs.47338	NM_001549	ENSG00000119917	IFIT3	CIG-49|GARG-49|IFI60|IFIT4|IRG2|ISG60|P60|RIG-G|cig41	interferon induced protein with tetratricopeptide repeats 3	protein-coding	15.07
chr10-74	chr10	100373304	100373571	Promoter	promoter-TSS (NR_026762)	-139	NR_026762	90271	Hs.628088	NR_026762	ENSG00000235823	OLMALINC	C10orf75|HI-LNC80|LINC00263|NCRNA00263|OLMALINCAS	oligodendrocyte maturation-associated long intergenic non-coding RNA	ncRNA	15.06
chr2-139	chr2	224585667	224585935	Promoter	promoter-TSS (NM_001257197)	-404	NM_001257197	8452	Hs.372286	NM_003590	ENSG00000036257	CUL3	CUL-3|PHA2E	cullin 3	protein-coding	15.06
chr6-30	chr6	7135837	7136097	Genebody	intron (NM_001003699, intron 1 of 12)	28114	NM_001003698	6239	Hs.298248	NM_002955	ENSG00000124782	RREB1	FINB|HNT|LZ321|RREB-1|Zep-1	ras responsive element binding protein 1	protein-coding	15.05
chr1-141	chr1	155080956	155081225	Genebody	CpG	2218	NM_004952	1944	Hs.516656	NM_004952	ENSG00000143590	EFNA3	EFL2|EPLG3|Ehk1-L|LERK3	ephrin A3	protein-coding	15.05
chr1-157	chr1	41739129	41739398	Genebody	intron (NM_024503, intron 1 of 8)	179444	NM_001127714	59269	Hs.403972	NM_024503	ENSG00000127124	HIVEP3	KBP-1|KBP1|KRC|SHN3|Schnurri-3|ZAS3|ZNF40C	human immunodeficiency virus type I enhancer binding protein 3	protein-coding	15.05
chr22-34	chr22	37484510	37484779	Promoter	intron (NM_002405, intron 1 of 7)	1743	NM_001166343	4242	Hs.517603	NM_002405	ENSG00000100060	MFNG	-	MFNG O-fucosylpeptide 3-beta-N-acetylglucosaminyltransferase	protein-coding	15.05
chr21-72	chr21	34615242	34615511	Promoter	promoter-TSS (NM_004414)	-234	NM_004414	1827	Hs.282326	NM_004414	ENSG00000159200	RCAN1	ADAPT78|CSP1|DSC1|DSCR1|MCIP1|RCN1	regulator of calcineurin 1	protein-coding	15.05
chr5-79	chr5	143020139	143020376	Genebody	intron (NR_146198, intron 12 of 22)	-151347	NR_046680	100874239	Hs.570896	NR_046680	ENSG00000226272	ARHGAP26-AS1	-	ARHGAP26 antisense RNA 1	ncRNA	15.04
chr1-216	chr1	220448321	220448590	Intergenic	MLT1J|LTR|ERVL-MaLR	-79728	NM_001286124	4139	Hs.497806	NM_018650	ENSG00000116141	MARK1	MARK|Par-1c|Par1c	microtubule affinity regulating kinase 1	protein-coding	15.03
chr2-104	chr2	43996006	43996228	Promoter	promoter-TSS (NM_133259)	-112	NM_133259	10128	Hs.368084	NM_133259	ENSG00000138095	LRPPRC	CLONE-23970|GP130|LRP130|LSFC	leucine rich pentatricopeptide repeat containing	protein-coding	15.02
chr20-38	chr20	63865039	63865302	Promoter	promoter-TSS (NM_003288)	-58	NM_199361	7165	Hs.473296	NM_003288	ENSG00000101150	TPD52L2	D54|TPD54	tumor protein D52 like 2	protein-coding	15.01
chr12-77	chr12	53496291	53496556	Genebody	intron (NM_001193511, intron 1 of 13)	3237	NM_001193511	7786	Hs.713539	NM_006301	ENSG00000139625	MAP3K12	DLK|MEKK12|MUK|ZPK|ZPKP1	mitogen-activated protein kinase kinase kinase 12	protein-coding	15.01
chr12-51	chr12	4538433	4538697	Promoter	promoter-TSS (NM_001130862)	-57	NR_144380	57102	Hs.302977	NM_020374	ENSG00000047621	C12orf4	-	chromosome 12 open reading frame 4	protein-coding	15.01
chr11-106	chr11	75689845	75690114	Intergenic	MLT1L|LTR|ERVL-MaLR	-21545	NM_033063	4135	Hs.585540	NM_033063	ENSG00000171533	MAP6	MAP6-N|MTAP6|N-STOP|STOP	microtubule associated protein 6	protein-coding	15
chr5-54	chr5	108748786	108749055	Promoter	promoter-TSS (NR_146155)	-7	NM_001308038	2241	Hs.107418	NM_005246	ENSG00000151422	FER	PPP1R74|TYK3|p94-Fer	FER tyrosine kinase	protein-coding	15
chr2-97	chr2	55134071	55134325	Genebody	MER41B|LTR|ERV1	3633	NM_001321904	57142	Hs.637850	NM_007008	ENSG00000115310	RTN4	ASY|NI220/250|NOGO|NSP|NSP-CL|Nbla00271|Nbla10545|RTN-X|RTN4-A|RTN4-B1|RTN4-B2|RTN4-C	reticulon 4	protein-coding	15
chr16-80	chr16	30064237	30064506	Promoter	promoter-TSS (NM_001127617)	92	NM_184043	226	Hs.513490	NM_000034	ENSG00000149925	ALDOA	ALDA|GSD12|HEL-S-87p	aldolase, fructose-bisphosphate A	protein-coding	14.97
chr1-177	chr1	88891558	88891827	Promoter	promoter-TSS (NM_001514)	-74	NM_001514	2959	Hs.481852	NM_001514	ENSG00000137947	GTF2B	TF2B|TFIIB	general transcription factor IIB	protein-coding	14.97
chr14-56	chr14	68822308	68822577	Intergenic	Intergenic	-26199	NM_001244701	677	Hs.85155	NM_004926	ENSG00000185650	ZFP36L1	BRF1|Berg36|ERF-1|ERF1|RNF162B|TIS11B|cMG1	ZFP36 ring finger protein like 1	protein-coding	14.97
chr1-415	chr1	169312216	169312485	Genebody	MLT1H2|LTR|ERVL-MaLR	-55529	NM_001320972	8548	Hs.130746	NM_003666	ENSG00000117475	BLZF1	GOLGIN-45|JEM-1|JEM-1s|JEM1	basic leucine zipper nuclear factor 1	protein-coding	14.95
chr10-90	chr10	67772974	67773243	Intergenic	MIRb|SINE|MIR	65071	NM_021800	56521	Hs.260720	NM_021800	ENSG00000108176	DNAJC12	HPANBH4|JDP1	DnaJ heat shock protein family (Hsp40) member C12	protein-coding	14.95
chr11-42	chr11	3049943	3050212	Genebody	intron (NM_001014437, intron 1 of 22).2	7374	NM_139273	833	Hs.274873	NM_001751	ENSG00000110619	CARS	CARS1|CYSRS|MGC:11246	cysteinyl-tRNA synthetase	protein-coding	14.92
chr20-17	chr20	38033128	38033362	Promoter	promoter-TSS (NM_021215)	223	NM_001303457	9675	Hs.655481	NM_014657	ENSG00000101407	TTI1	KIAA0406|smg-10	TELO2 interacting protein 1	protein-coding	14.9
chr7-30	chr7	23470528	23470797	Promoter	promoter-TSS (NM_006547)	-286	NM_006547	10643	Hs.700696	NM_006547	ENSG00000136231	IGF2BP3	CT98|IMP-3|IMP3|KOC|KOC1|VICKZ3	insulin like growth factor 2 mRNA binding protein 3	protein-coding	14.89
chr21-50	chr21	6218781	6219050	Intergenic	Intergenic	32855	NM_001322975	102723360	Hs.743984	NM_001322975		LOC102723360	-	uncharacterized LOC102723360	protein-coding	14.89
chr17-118	chr17	17749983	17750252	Genebody	MLT1J2|LTR|ERVL-MaLR	16185	NR_130894	100861516	Hs.624874	NR_130894	ENSG00000237328	RAI1-AS1	-	RAI1 antisense RNA 1	ncRNA	14.89
chr6-49	chr6	43369682	43369951	Promoter	promoter-TSS (NM_014345)	-373	NM_014345	24149	Hs.509718	NM_014345	ENSG00000171467	ZNF318	HRIHFB2436|TZF|ZFP318	zinc finger protein 318	protein-coding	14.89
chr5-64	chr5	131635275	131635544	Promoter	promoter-TSS (NM_001164386)	-173	NM_001164387	51735	Hs.483329	NM_016340	ENSG00000158987	RAPGEF6	KIA001LB|PDZ-GEF2|PDZGEF2|RA-GEF-2|RAGEF2	Rap guanine nucleotide exchange factor 6	protein-coding	14.87
chr19-74	chr19	5130397	5130648	Genebody	intron (NM_015015, intron 11 of 22)	161409	NM_015015	23030	Hs.654816	NM_015015	ENSG00000127663	KDM4B	JMJD2B|TDRD14B	lysine demethylase 4B	protein-coding	14.87
chr3-52	chr3	196179725	196179962	Intergenic	Tigger15a|DNA|TcMar-Tigger	31586	NM_001039617	131540	Hs.111591	NM_001039617	ENSG00000163958	ZDHHC19	DHHC19	zinc finger DHHC-type containing 19	protein-coding	14.86
chr20-30	chr20	47467048	47467317	Intergenic	MER50|LTR|ERV1	-34675	NM_006534	8202	Hs.592142	NM_006534	ENSG00000124151	NCOA3	ACTR|AIB-1|AIB1|CAGH16|CTG26|KAT13B|RAC3|SRC-3|SRC3|TNRC14|TNRC16|TRAM-1|bHLHe42|pCIP	nuclear receptor coactivator 3	protein-coding	14.84
chr13-27	chr13	32315300	32315559	Promoter	promoter-TSS (NM_000059)	-51	NM_000059	675	Hs.34012	NM_000059	ENSG00000139618	BRCA2	BRCC2|BROVCA2|FACD|FAD|FAD1|FANCD|FANCD1|GLM3|PNCA2|XRCC11	BRCA2, DNA repair associated	protein-coding	14.83
chrX-26	chrX	123784866	123785131	Intergenic	Intergenic	-51944	NM_001081550	57187	Hs.149991	NM_020449	ENSG00000125676	THOC2	CXorf3|MRX12|MRX35|THO2|dJ506G2.1|hTREX120	THO complex 2	protein-coding	14.82
chr3-68	chr3	102059615	102059884	Intergenic	Intergenic	-103956	NR_135549	101929411	Hs.506540	NR_135549		LOC101929411	-	uncharacterized LOC101929411	ncRNA	14.81
chr4-42	chr4	158810169	158810437	Genebody	intron (NM_001323916, intron 1 of 16)	4209	NM_001323916	57600	Hs.652441	NM_020840	ENSG00000052795	FNIP2	FNIPL|MAPO1	folliculin interacting protein 2	protein-coding	14.81
chr1-140	chr1	192575418	192575687	Promoter	promoter-TSS (NM_002922)	-175	NM_002922	5996	Hs.75256	NM_002922	ENSG00000090104	RGS1	1R20|BL34|HEL-S-87|IER1|IR20	regulator of G protein signaling 1	protein-coding	14.81
chr17-91	chr17	38752379	38752646	Promoter	promoter-TSS (NR_104194)	-201	NR_104195	5691	Hs.82793	NM_002795	ENSG00000277791	PSMB3	HC10-II	proteasome subunit beta 3	protein-coding	14.79
chr6-54	chr6	32128207	32128476	Promoter	promoter-TSS (NM_004381).4	-101	NM_001136153	1388	Hs.42853	NM_004381	ENSG00000213676	ATF6B	CREB-RP|CREBL1|G13	activating transcription factor 6 beta	protein-coding	14.78
chr20-36	chr20	13638877	13639146	Promoter	promoter-TSS (NM_001323603)	-75	NR_136628	55617	Hs.348297	NM_017714	ENSG00000089123	TASP1	C20orf13|dJ585I14.2	taspase 1	protein-coding	14.78
chr17-103	chr17	44348218	44348487	Genebody	intron (NM_002087, intron 1 of 12)	3266	NM_002087	2896	Hs.514220	NM_002087	ENSG00000030582	GRN	CLN11|GEP|GP88|PCDGF|PEPI|PGRN	granulin precursor	protein-coding	14.78
chr22-31	chr22	26672536	26672793	Promoter	promoter-TSS (NR_110543)	-179	NR_110543	102724827	Hs.642767	NR_110543		MIATNB	-	MIAT neighbor (non-protein coding)	ncRNA	14.77
chr2-74	chr2	85994117	85994386	Intergenic	Intergenic	104971	NR_110569	101928113	Hs.625888	NR_110569		ST3GAL5-AS1	-	ST3GAL5 antisense RNA 1 (head to head)	ncRNA	14.76
chr5-86	chr5	168579565	168579834	Promoter	promoter-TSS (NM_024594)	-90	NM_024594	79646	Hs.388400	NM_024594	ENSG00000120137	PANK3	-	pantothenate kinase 3	protein-coding	14.76
chr2-57	chr2	110657752	110658017	Promoter	TTS (NR_132975)	365	NR_132975	106635550		NR_132975		SNORD132	-	small nucleolar RNA, C/D box 132	snoRNA	14.76
chr15-46	chr15	101242262	101242531	Genebody	intron (NM_014918, intron 1 of 2)	9536	NM_014918	22856	Hs.110488	NM_014918	ENSG00000131873	CHSY1	CHSY|CSS1|ChSy-1|TPBS	chondroitin sulfate synthase 1	protein-coding	14.76
chr17-99	chr17	51260249	51260484	Promoter	promoter-TSS (NM_017643)	-170	NM_016001	51096	Hs.709327	NM_016001	ENSG00000011260	UTP18	CGI-48|WDR50	UTP18, small subunit processome component	protein-coding	14.74
chr1-206	chr1	107499216	107499485	Intergenic	Intergenic	189154	NM_001079874	10451	Hs.267659	NM_006113	ENSG00000134215	VAV3	-	vav guanine nucleotide exchange factor 3	protein-coding	14.73
chr6-59	chr6	135103035	135103278	Intergenic	Intergenic	-48258	NM_001145158	10767	Hs.378532	NM_006620	ENSG00000112339	HBS1L	EF-1a|ERFS|HBS1|HSPC276|eRF3c	HBS1 like translational GTPase	protein-coding	14.73
chr11-37	chr11	60952131	60952400	Promoter	promoter-TSS (NR_027391)	-480	NM_016582	51296	Hs.237856	NM_016582	ENSG00000110446	SLC15A3	OCTP|PHT2|PTR3	solute carrier family 15 member 3	protein-coding	14.7
chr5-60	chr5	132556847	132557116	Promoter	promoter-TSS (NM_005732)	57	NM_005732	10111	Hs.633509	NM_005732	ENSG00000113522	RAD50	NBSLD|RAD502|hRad50	RAD50 double strand break repair protein	protein-coding	14.7
chr1-179	chr1	169915743	169916012	Intergenic	L1MEd|LINE|L1	-21918	NM_181093	57147	Hs.435560	NM_020423	ENSG00000000457	SCYL3	PACE-1|PACE1	SCY1 like pseudokinase 3	protein-coding	14.7
chr19-119	chr19	8321367	8321632	Promoter	promoter-TSS (NR_135539)	-1	NM_001031	6234	Hs.153177	NM_001031	ENSG00000233927	RPS28	DBA15|S28|eS28	ribosomal protein S28	protein-coding	14.68
chr5-52	chr5	160439377	160439634	Intergenic	Intergenic	17595	NM_001282383	9232	Hs.350966	NM_004219	ENSG00000164611	PTTG1	EAP1|HPTTG|PTTG|TUTR1	pituitary tumor-transforming 1	protein-coding	14.66
chr14-47	chr14	61438603	61438868	Genebody	intron (NM_006255, intron 2 of 13)	117292	NM_006255	5583	Hs.333907	NM_006255	ENSG00000027075	PRKCH	PKC-L|PKCL|PRKCL|nPKC-eta	protein kinase C eta	protein-coding	14.65
chr7-39	chr7	604434	604701	Promoter	CpG	1169	NR_110055	101926963	Hs.521338	NR_110054		LOC101926963	-	uncharacterized LOC101926963	ncRNA	14.65
chr19-95	chr19	2599037	2599305	Genebody	intron (NM_052847, intron 2 of 4)	-31544	NR_107004	102465838		NR_107004	ENSG00000277904	MIR7850	hsa-mir-7850	microRNA 7850	ncRNA	14.65
chr14-38	chr14	76203780	76204049	Genebody	non-coding (NR_110314, exon 10 of 10)	49560	NR_110314	55668	Hs.410231	NM_017926	ENSG00000089916	GPATCH2L	C14orf118	G-patch domain containing 2 like	protein-coding	14.65
chr17-101	chr17	19463210	19463472	Intergenic	MSTB|LTR|ERVL-MaLR	52163	NM_007148	7732	Hs.189482	NM_007148	ENSG00000128482	RNF112	BFP|ZNF179	ring finger protein 112	protein-coding	14.63
chr12-72	chr12	94047052	94047313	Intergenic	Intergenic	-101541	NM_005761	10154	Hs.584845	NM_005761	ENSG00000136040	PLXNC1	CD232|PLXN-C1|VESPR	plexin C1	protein-coding	14.63
chr3-71	chr3	169813785	169814054	Promoter	LTR1A1|LTR|ERV1	-1133	NM_001172779	151827	Hs.591289	NM_153353	ENSG00000171757	LRRC34	-	leucine rich repeat containing 34	protein-coding	14.62
chr8-27	chr8	27363699	27363968	Genebody	intron (NM_173174, intron 6 of 35)	38269	NM_173175	2185	Hs.491322	NM_004103	ENSG00000120899	PTK2B	CADTK|CAKB|FADK2|FAK2|PKB|PTK|PYK2|RAFTK	protein tyrosine kinase 2 beta	protein-coding	14.6
chr19-84	chr19	14004849	14005116	Promoter	intron (NM_002918, intron 1 of 20)	1340	NM_002918	5989	Hs.655215	NM_002918	ENSG00000132005	RFX1	EFC|RFX	regulatory factor X1	protein-coding	14.57
chr13-31	chr13	110459089	110459352	Genebody	L1MB7|LINE|L1	4067	NM_001267044	100129836	Hs.640035	NM_001267044		COL4A2-AS2	-	COL4A2 antisense 2	protein-coding	14.55
chr3-78	chr3	150384899	150385153	Intergenic	Intergenic	-23309	NM_014779	9819	Hs.722470	NM_014779	ENSG00000196428	TSC22D2	TILZ4a|TILZ4b|TILZ4c	TSC22 domain family member 2	protein-coding	14.55
chr11-46	chr11	64317595	64317864	Promoter	promoter-TSS (NM_012094)	355	NM_001286084	51504	Hs.333579	NM_016404	ENSG00000173113	TRMT112	HSPC152|HSPC170|TRM112|TRMT11-2|hTrm112	tRNA methyltransferase subunit 11-2	protein-coding	14.52
chr6-107	chr6	21846752	21847021	Genebody	intron (NR_015410, intron 4 of 11)	180473	NR_015410	401237	Hs.712707	NR_015410		CASC15	CANT|LINC00340|lnc-SOX4-1	cancer susceptibility 15 (non-protein coding)	ncRNA	14.52
chr20-29	chr20	32109490	32109729	Promoter	5' UTR (NM_014742, exon 1 of 18)	103	NM_014742	9777	Hs.654665	NM_014742	ENSG00000101337	TM9SF4	dJ836N17.2	transmembrane 9 superfamily member 4	protein-coding	14.5
chr8-46	chr8	37416349	37416610	Genebody	L1ME4c|LINE|L1	77434	NR_121620	100507420	Hs.105962	NR_121620		LINC01605	-	long intergenic non-protein coding RNA 1605	ncRNA	14.49
chr20-89	chr20	35771824	35772091	Promoter	promoter-TSS (NM_016436)	-44	NM_016436	51230	Hs.517044	NM_016436	ENSG00000025293	PHF20	C20orf104|GLEA2|HCA58|NZF|TDRD20A|TZP	PHD finger protein 20	protein-coding	14.49
chr8-34	chr8	100462879	100463138	Intergenic	Intergenic	80245	NR_039681	100616451		NR_039681	ENSG00000265599	MIR4471	-	microRNA 4471	ncRNA	14.49
chr11-53	chr11	110027314	110027583	Intergenic	Intergenic	-65913	NM_033390	85463	Hs.376289	NM_033390	ENSG00000149289	ZC3H12C	MCPIP3	zinc finger CCCH-type containing 12C	protein-coding	14.49
chr12-88	chr12	51238730	51238993	Promoter	5' UTR (NM_001136266, exon 1 of 4)	137	NM_014764	9802	Hs.369761	NM_014764	ENSG00000183283	DAZAP2	PRTB	DAZ associated protein 2	protein-coding	14.46
chr1-165	chr1	220089822	220090074	Promoter	promoter-TSS (NM_001286149)	-95	NM_001286150	10380	Hs.406134	NM_006085	ENSG00000162813	BPNT1	HEL20|PIP	3'(2'), 5'-bisphosphate nucleotidase 1	protein-coding	14.46
chr14-45	chr14	22556408	22556655	Promoter	intron (NR_146543, intron 2 of 2)	531	NR_146543	105370400		NR_146543	ENSG00000259054	LINC02332	-	long intergenic non-protein coding RNA 2332	ncRNA	14.44
chr17-96	chr17	21323014	21323283	Intergenic	MLT1J|LTR|ERVL-MaLR	35112	NM_002756	5606	Hs.514012	NM_002756	ENSG00000034152	MAP2K3	MAPKK3|MEK3|MKK3|PRKMK3|SAPKK-2|SAPKK2	mitogen-activated protein kinase kinase 3	protein-coding	14.44
chr21-47	chr21	7659263	7659525	Intergenic	Intergenic	32807	NM_001322975	102723360	Hs.743984	NM_001322975		LOC102723360	-	uncharacterized LOC102723360	protein-coding	14.41
chr1-196	chr1	89953074	89953341	Intergenic	LTR8B|LTR|ERV1	41759	NR_002830	492303	Hs.550796	NR_002830		GEMIN8P4	-	gem nuclear organelle associated protein 8 pseudogene 4	pseudo	14.41
chr20-44	chr20	1122511	1122780	Genebody	intron (NM_001323408, intron 1 of 6)	4052	NM_001323410	9491	Hs.471917	NM_006814	ENSG00000125818	PSMF1	PI31	proteasome inhibitor subunit 1	protein-coding	14.41
chr16-100	chr16	11309921	11310190	Intergenic	L1ME3|LINE|L1	-3528	NR_031678	100313773		NR_031678	ENSG00000221801	MIR548H2	MIR548H-2|MIRN548H2	microRNA 548h-2	ncRNA	14.38
chr19-80	chr19	1897638	1897907	Intergenic	Intergenic	-7442	NM_001329533	113179	Hs.144980	NM_138422	ENSG00000213638	ADAT3	FWP005|MRT36|MST121|MSTP121|S863-5|TAD3	adenosine deaminase, tRNA specific 3	protein-coding	14.38
chr5-65	chr5	14209288	14209557	Genebody	L1MC5|LINE|L1	65720	NM_007118	7204	Hs.130031	NM_007118	ENSG00000038382	TRIO	ARHGEF23|MEBAS|MRD44|tgat	trio Rho guanine nucleotide exchange factor	protein-coding	14.36
chr17-119	chr17	36089882	36090139	Promoter	non-coding (NR_111964, exon 1 of 3).3	133	NR_111964	6349	Hs.512683	NM_021006		CCL3L1	464.2|D17S1718|G0S19-2|LD78|LD78-beta(1-70)|LD78BETA|MIP1AP|SCYA3L|SCYA3L1	C-C motif chemokine ligand 3 like 1	protein-coding	14.35
chr5-142	chr5	172771159	172771422	Promoter	promoter-TSS (NM_004417)	-90	NM_004417	1843	Hs.171695	NM_004417	ENSG00000120129	DUSP1	CL100|HVH1|MKP-1|MKP1|PTPN10	dual specificity phosphatase 1	protein-coding	14.35
chr10-97	chr10	103678240	103678499	Genebody	intron (NM_014631, intron 6 of 13)	-68410	NR_038940	100505839	Hs.655149	NR_038940	ENSG00000280693	SH3PXD2A-AS1	-	SH3PXD2A antisense RNA 1	ncRNA	14.35
chr1-160	chr1	26900303	26900553	Promoter	promoter-TSS (NM_022078)	43	NM_022078	63906	Hs.10903	NM_022078	ENSG00000198746	GPATCH3	GPATC3	G-patch domain containing 3	protein-coding	14.29
chr6-80	chr6	37516552	37516817	Genebody	intron (NR_126057, intron 1 of 3)	9336	NR_126057	100505530	Hs.582978	NM_001039791		LINC02520	-	long intergenic non-protein coding RNA 2520	ncRNA	14.27
chr2-100	chr2	3605475	3605737	Promoter	promoter-TSS (NM_001255986)	-446	NM_001255986	78989	Hs.32603	NM_024027	ENSG00000118004	COLEC11	3MC2|CL-K1-I|CL-K1-II|CL-K1-IIa|CL-K1-IIb|CLK1	collectin subfamily member 11	protein-coding	14.27
chr1-172	chr1	2545951	2546220	Intergenic	Intergenic	-10280	NM_001297605	8764	Hs.512898	NM_003820	ENSG00000157873	TNFRSF14	ATAR|CD270|HVEA|HVEM|LIGHTR|TR2	TNF receptor superfamily member 14	protein-coding	14.25
chr19-83	chr19	7807604	7807873	Intergenic	MIRb|SINE|MIR	20254	NR_002931	440508	Hs.568222	NR_002931		CLEC4GP1	-	C-type lectin domain family 4 member G pseudogene 1	pseudo	14.25
chr6-53	chr6	52497731	52497991	Genebody	3' UTR (NM_012288, exon 11 of 11)	76854	NM_001172420	114327	Hs.403171	NM_018100	ENSG00000096093	EFHC1	EJM1|dJ304B14.2	EF-hand domain containing 1	protein-coding	14.24
chrX-23	chrX	103628809	103629069	Promoter	promoter-TSS (NM_004780)	-25	NM_004780	9338	Hs.95243	NM_004780	ENSG00000172465	TCEAL1	SIIR|WEX9|p21|pp21	transcription elongation factor A like 1	protein-coding	14.24
chr12-59	chr12	27284823	27285087	Genebody	intron (NM_015000, intron 1 of 13)	40810	NM_015000	23012	Hs.184523	NM_015000	ENSG00000211455	STK38L	NDR2	serine/threonine kinase 38 like	protein-coding	14.24
chr20-31	chr20	51400417	51400686	Genebody	intron (NM_001258294, intron 9 of 10)	52426	NR_036162	100422889		NR_036162	ENSG00000266761	MIR3194	mir-3194	microRNA 3194	ncRNA	14.22
chr6-84	chr6	170271883	170272135	Promoter	promoter-TSS (NR_104177)	-465	NR_104177	401289	Hs.121442	NR_104177		LINC01624	-	long intergenic non-protein coding RNA 1624	ncRNA	14.21
chr2-85	chr2	215881028	215881286	Intergenic	LTR85c|LTR|Gypsy?	-37621	NR_037195	646324	Hs.655713	NR_037195	ENSG00000235770	LINC00607	-	long intergenic non-protein coding RNA 607	ncRNA	14.21
chr1-175	chr1	46303384	46303642	Promoter	promoter-TSS (NM_006369)	-100	NM_001297565	7388	Hs.481571	NM_006004	ENSG00000173660	UQCRH	QCR6|UQCR8	ubiquinol-cytochrome c reductase hinge protein	protein-coding	14.21
chr11-44	chr11	8202036	8202299	Intergenic	MIR3|SINE|MIR	-33073	NM_001346693	79608	Hs.231850	NM_024557	ENSG00000166405	RIC3	AYST720|PRO1385	RIC3 acetylcholine receptor chaperone	protein-coding	14.19
chr1-205	chr1	52366090	52366356	Promoter	promoter-TSS (NM_032449)	-18	NM_001330585	200014	Hs.591451	NM_032449	ENSG00000154222	CC2D1B	-	coiled-coil and C2 domain containing 1B	protein-coding	14.16
chr10-80	chr10	31384279	31384533	Genebody	Charlie10|DNA|hAT-Charlie	62785	NM_001323676	6935	Hs.124503	NM_030751	ENSG00000148516	ZEB1	AREB6|BZP|DELTAEF1|FECD6|NIL2A|PPCD3|TCF8|ZFHEP|ZFHX1A	zinc finger E-box binding homeobox 1	protein-coding	14.15
chr22-33	chr22	23717245	23717514	Promoter	promoter-TSS (NR_024448)	44	NR_024448	91316	Hs.148656	NR_024448	ENSG00000228315	GUSBP11	-	glucuronidase, beta pseudogene 11	pseudo	14.14
chr11-38	chr11	64880587	64880856	Promoter	Intergenic	-1008	NM_001282445	10938	Hs.523774	NM_006795	ENSG00000110047	EHD1	H-PAST|HPAST1|PAST|PAST1	EH domain containing 1	protein-coding	14.14
chr14-48	chr14	93066088	93066347	Promoter	intron (NM_001142593, intron 3 of 10)	-1235	NR_002808	319085	Hs.612888	NR_002808	ENSG00000258730	ITPK1-AS1	C14orf85|ITPK1-AS|ITPK1AS|NCRNA00203	ITPK1 antisense RNA 1	ncRNA	14.13
chr19-121	chr19	13116602	13116865	Promoter	promoter-TSS (NM_001351762)	38	NM_001351762	55621	Hs.515169	NM_017722	ENSG00000104907	TRMT1	TRM1	tRNA methyltransferase 1	protein-coding	14.13
chr8-30	chr8	123516888	123517143	Genebody	intron (NM_148177, intron 1 of 5)	15128	NM_148177	114907	Hs.403933	NM_058229	ENSG00000156804	FBXO32	Fbx32|MAFbx	F-box protein 32	protein-coding	14.12
chr12-57	chr12	50112034	50112303	Promoter	TTS (NM_001257199)	187	NM_001257134	84987	Hs.388645	NM_032901	ENSG00000178449	COX14	C12orf62|PCAG1	COX14, cytochrome c oxidase assembly factor	protein-coding	14.11
chr1-147	chr1	226028984	226029253	Intergenic	MIRb|SINE|MIR	-29753	NM_152608	163859	Hs.520192	NM_152608	ENSG00000143751	SDE2	C1orf55|dJ671D7.1	SDE2 telomere maintenance homolog	protein-coding	14.11
chr2-147	chr2	61443743	61443991	Genebody	L1MC1|LINE|L1	-26490	NR_003707	100124537	Hs.675825	NR_003707	ENSG00000206937	SNORA70B	-	small nucleolar RNA, H/ACA box 70B	snoRNA	14.09
chr10-73	chr10	72625963	72626232	Promoter	promoter-TSS (NM_006077)	94	NM_006077	10367	Hs.524367	NM_006077	ENSG00000107745	MICU1	CALC|CBARA1|EFHA3|MPXPS	mitochondrial calcium uptake 1	protein-coding	14.09
chr3-81	chr3	127697479	127697748	Genebody	MLT1J|LTR|ERVL-MaLR	24675	NR_033429	80325	Hs.107812	NM_032548	ENSG00000114626	ABTB1	BPOZ|BTB3|BTBD21|EF1ABP|PP2259	ankyrin repeat and BTB domain containing 1	protein-coding	14.09
chr12-76	chr12	108635432	108635701	Promoter	promoter-TSS (NR_039717)	-244	NR_039717	100616240		NR_039717	ENSG00000284388	MIR4496	-	microRNA 4496	ncRNA	14.06
chr6-94	chr6	109458939	109459197	Genebody	L2b|LINE|L2	-3081	NM_001159291	64780	Hs.33476	NM_022765	ENSG00000135596	MICAL1	MICAL|MICAL-1|NICAL	microtubule associated monooxygenase, calponin and LIM domain containing 1	protein-coding	14.04
chr7-55	chr7	44751044	44751310	Genebody	intron (NM_031449, intron 1 of 18)	2246	NM_031449	83637	Hs.77978	NM_031449	ENSG00000122515	ZMIZ2	NET27|TRAFIP20|ZIMP7|hZIMP7	zinc finger MIZ-type containing 2	protein-coding	14.03
chr9-55	chr9	113410296	113410557	Promoter	promoter-TSS (NM_001278630)	-218	NM_001278629	257169	Hs.632691	NM_152786	ENSG00000157653	C9orf43	-	chromosome 9 open reading frame 43	protein-coding	14.02
chr1-161	chr1	1251026	1251286	Intergenic	Intergenic	-4434	NM_001014980	388581	Hs.197613	NM_001014980	ENSG00000184163	C1QTNF12	C1QDC2|CTRP12|FAM132A	C1q and TNF related 12	protein-coding	14.02
chr16-120	chr16	2487197	2487466	Genebody	intron (NM_020705, intron 1 of 6)	12185	NM_020705	57465	Hs.353087	NM_020705	ENSG00000162065	TBC1D24	DFNA65|DFNB86|DOORS|EIEE16|FIME|TLDC6	TBC1 domain family member 24	protein-coding	14.01
chr14-49	chr14	73771862	73772131	Genebody	intron (NM_001043318, intron 1 of 11)	-11698	NM_194278	91748	Hs.594157	NM_194278	ENSG00000156030	ELMSAN1	C14orf117|C14orf43|LSR68|MIDEAS|c14_5541	ELM2 and Myb/SANT domain containing 1	protein-coding	14.01
chr2-70	chr2	96774027	96774289	Genebody	intron (NM_020184, intron 1 of 6)	13256	NM_020184	26504	Hs.175043	NM_020184	ENSG00000158158	CNNM4	ACDP4	cyclin and CBS domain divalent metal cation transport mediator 4	protein-coding	14
chr9-45	chr9	124771508	124771757	Promoter	promoter-TSS (NM_001489)	-322	NM_033334	2649	Hs.20131	NM_001489	ENSG00000148200	NR6A1	CT150|GCNF|GCNF1|NR61|RTR|hGCNF|hRTR	nuclear receptor subfamily 6 group A member 1	protein-coding	14
chr2-73	chr2	156538073	156538320	Genebody	intron (NM_001083112, intron 6 of 16)	101808	NM_000408	2820	Hs.512382	NM_000408	ENSG00000115159	GPD2	GDH2|GPDM|mGPDH	glycerol-3-phosphate dehydrogenase 2	protein-coding	14
chr6-75	chr6	42050190	42050395	Promoter	promoter-TSS (NM_138572)	-221	NM_138572	129685	Hs.520122	NM_138572	ENSG00000137413	TAF8	II|TAF|TAFII-43|TAFII43|TBN	TATA-box binding protein associated factor 8	protein-coding	13.98
chr17-105	chr17	36948636	36948905	Promoter	promoter-TSS (NM_012138).2	-105	NM_012138	26574	Hs.195740	NM_012138	ENSG00000275700	AATF	BFR2|CHE-1|CHE1|DED	apoptosis antagonizing transcription factor	protein-coding	13.98
chr19-77	chr19	46661425	46661694	Promoter	promoter-TSS (NR_040041)	81	NR_040041	100506068	Hs.434327	NR_040041	ENSG00000245598	DACT3-AS1	-	DACT3 antisense RNA 1	ncRNA	13.98
chr3-73	chr3	48919768	48920027	Promoter	promoter-TSS (NM_001123040)	-512	NM_001123040	646450	Hs.720727	NM_001123040	ENSG00000221883	ARIH2OS	C3orf71	ariadne RBR E3 ubiquitin protein ligase 2 opposite strand	protein-coding	13.96
chr1-190	chr1	206924768	206925027	Intergenic	Intergenic	-2864	NM_001142473	9214	Hs.58831	NM_005449	ENSG00000162894	FCMR	FAIM3|TOSO	Fc fragment of IgM receptor	protein-coding	13.96
chr16-147	chr16	72609955	72610224	Genebody	intron (NR_126330, intron 1 of 13)	54920	NR_126330	101927957	Hs.637253	NR_126330	ENSG00000261008	LINC01572	-	long intergenic non-protein coding RNA 1572	ncRNA	13.95
chr19-99	chr19	19900663	19900932	Promoter	promoter-TSS (NM_031218)	-116	NM_031218	81931	Hs.301059	NM_031218	ENSG00000184635	ZNF93	HPF34|HTF34|TF34|ZNF505	zinc finger protein 93	protein-coding	13.95
chr19-124	chr19	17126130	17126396	Genebody	intron (NM_001130065, intron 2 of 39)	34028	NR_145784	109623483		NR_145784		SNORA118	-	small nucleolar RNA, H/ACA box 118	snoRNA	13.95
chr1-176	chr1	88684042	88684311	Promoter	promoter-TSS (NM_001320707)	32	NM_001320708	5586	Hs.440833	NM_006256	ENSG00000065243	PKN2	PAK2|PRK2|PRKCL2|PRO2042|Pak-2|STK7	protein kinase N2	protein-coding	13.93
chr6-66	chr6	134247235	134247504	Genebody	intron (NM_001143676, intron 2 of 13)	-69497	NM_001143677	6446	Hs.510078	NM_005627	ENSG00000118515	SGK1	SGK	serum/glucocorticoid regulated kinase 1	protein-coding	13.93
chr4-126	chr4	113080186	113080452	Genebody	intron (NM_001354265, intron 1 of 44)	-26544	NR_031641	100302188		NR_031641	ENSG00000283193	MIR1243	MIRN1243|hsa-mir-1243	microRNA 1243	ncRNA	13.92
chr19-82	chr19	41397303	41397563	Promoter	promoter-TSS (NM_020158)	-82	NM_020158	56915	Hs.283741	NM_020158	ENSG00000077348	EXOSC5	RRP41B|RRP46|Rrp46p|hRrp46p|p12B	exosome component 5	protein-coding	13.91
chr1-200	chr1	2548751	2549006	Intergenic	Intergenic	-7487	NM_001297605	8764	Hs.512898	NM_003820	ENSG00000157873	TNFRSF14	ATAR|CD270|HVEA|HVEM|LIGHTR|TR2	TNF receptor superfamily member 14	protein-coding	13.9
chr15-40	chr15	68032657	68032925	Intergenic	Intergenic	-21388	NM_016166	8554	Hs.162458	NM_016166	ENSG00000033800	PIAS1	DDXBP1|GBP|GU/RH-II|ZMIZ3	protein inhibitor of activated STAT 1	protein-coding	13.9
chr15-37	chr15	43808987	43809218	Genebody	intron (NM_005926, intron 7 of 8)	8681	NM_001199885	25764	Hs.730672	NM_016400	ENSG00000242028	HYPK	C15orf63|HSPC136	huntingtin interacting protein K	protein-coding	13.87
chr2-112	chr2	237815797	237816056	Genebody	L2c|LINE|L2	17181	NM_001080504	375316	Hs.607265	NM_198852	ENSG00000177483	RBM44	-	RNA binding motif protein 44	protein-coding	13.85
chr16-104	chr16	12613688	12613957	Intergenic	LTR10A|LTR|ERV1	-106499	NR_039869	100616195		NR_039869	ENSG00000264733	MIR4718	-	microRNA 4718	ncRNA	13.85
chr17-134	chr17	77460043	77460312	Genebody	intron (NM_001293698, intron 1 of 9)	6184	NM_001293698	10801	Hs.440932	NM_006640	ENSG00000184640	SEPT9	AF17q25|MSF|MSF1|NAPB|PNUTL4|SINT1|SeptD1	septin 9	protein-coding	13.85
chr6-71	chr6	106325701	106325962	Promoter	promoter-TSS (NM_001286108)	-11	NM_004849	9474	Hs.486063	NM_004849	ENSG00000057663	ATG5	APG5|APG5-LIKE|APG5L|ASP|SCAR25|hAPG5	autophagy related 5	protein-coding	13.83
chr5-69	chr5	132425572	132425841	Genebody	MIRb|SINE|MIR	14933	NM_001207001	441108	Hs.658288	NM_001013717		C5orf56	-	chromosome 5 open reading frame 56	protein-coding	13.82
chr22-43	chr22	41940160	41940429	Promoter	promoter-TSS (NM_001110215)	-75	NM_001110215	79019	Hs.208912	NM_024053	ENSG00000100162	CENPM	C22orf18|CENP-M|PANE1	centromere protein M	protein-coding	13.79
chr18-35	chr18	45962534	45962792	Genebody	intron (NM_020964, intron 1 of 43)	4676	NM_020964	57724	Hs.514843	NM_020964	ENSG00000152223	EPG5	HEEW1|KIAA1632|VICIS	ectopic P-granules autophagy protein 5 homolog	protein-coding	13.79
chr16-96	chr16	1408159	1408420	Genebody	CpG	6431	NM_001193388	64718	Hs.643536	NM_023076	ENSG00000059145	UNKL	C16orf28|ZC3H5L|ZC3HDC5L	unkempt family like zinc finger	protein-coding	13.77
chr7-49	chr7	105012674	105012938	Promoter	non-coding (NR_024586, exon 1 of 1)	1335	NR_024586	100216545	Hs.631150	NR_024586		KMT2E-AS1	-	KMT2E antisense RNA 1	ncRNA	13.75
chr2-78	chr2	102082951	102083192	Genebody	intron (NM_001320978, intron 1 of 11)	12695	NM_001288706	3554	Hs.701982	NM_000877	ENSG00000115594	IL1R1	CD121A|D2S1473|IL-1R-alpha|IL1R|IL1RA|P80	interleukin 1 receptor type 1	protein-coding	13.75
chr7-95	chr7	90737590	90737852	Genebody	intron (NM_001287137, intron 2 of 12)	27905	NM_001287136	5218	Hs.258576	NM_012395	ENSG00000058091	CDK14	PFTAIRE1|PFTK1	cyclin dependent kinase 14	protein-coding	13.75
chr2-136	chr2	36530338	36530607	Genebody	intron (NM_016441, intron 13 of 16)	67717	NM_005102	9637	Hs.258563	NM_005102	ENSG00000171055	FEZ2	HUM3CL	fasciculation and elongation protein zeta 2	protein-coding	13.74
chr1-186	chr1	154955995	154956264	Promoter	promoter-TSS (NM_001317735)	34	NM_020524	57326	Hs.505806	NM_020524	ENSG00000163346	PBXIP1	HPIP	PBX homeobox interacting protein 1	protein-coding	13.74
chr18-21	chr18	4267588	4267856	Genebody	MLT1F|LTR|ERVL-MaLR	3120	NR_036489	284215	Hs.647594	NR_036489	ENSG00000261520	DLGAP1-AS5	-	DLGAP1 antisense RNA 5	ncRNA	13.74
chr5-75	chr5	138032198	138032467	Promoter	promoter-TSS (NR_037900)	-442	NR_037900	100130172	Hs.616629	NR_037900		LOC100130172	-	uncharacterized LOC100130172	ncRNA	13.74
chr3-49	chr3	98770360	98770616	Genebody	intron (NM_001323363, intron 2 of 8)	7181	NM_001323368	10402	Hs.148716	NM_006100	ENSG00000064225	ST3GAL6	SIAT10|ST3GALVI	ST3 beta-galactoside alpha-2,3-sialyltransferase 6	protein-coding	13.73
chr10-75	chr10	74314220	74314488	Genebody	intron (NM_001202450, intron 3 of 9)	137865	NM_001123	132	Hs.656586	NM_001123	ENSG00000156110	ADK	AK	adenosine kinase	protein-coding	13.71
chr10-89	chr10	107442046	107442315	Intergenic	Intergenic	-277472	NM_001206569	114815	Hs.591915	NM_052918	ENSG00000108018	SORCS1	hSorCS	sortilin related VPS10 domain containing receptor 1	protein-coding	13.71
chr7-91	chr7	107169712	107169973	Promoter	CpG	827	NM_012257	26959	Hs.162032	NM_012257	ENSG00000105856	HBP1	-	HMG-box transcription factor 1	protein-coding	13.69
chr7-51	chr7	42911966	42912235	Promoter	promoter-TSS (NM_001099858)	-10	NM_001099858	79020	Hs.698120	NM_024054	ENSG00000136197	C7orf25	-	chromosome 7 open reading frame 25	protein-coding	13.68
chr4-94	chr4	128658394	128658659	Intergenic	Intergenic	-151097	NM_024900	79960	Hs.12420	NM_024900	ENSG00000077684	JADE1	PHF17	jade family PHD finger 1	protein-coding	13.67
chr9-48	chr9	7799223	7799478	Promoter	intron (NM_001318059, intron 1 of 1)	456	NM_001318058	90871	Hs.7517	NM_033428	ENSG00000137038	DMAC1	C9orf123|TMEM261	distal membrane arm assembly complex 1	protein-coding	13.64
chr16-123	chr16	81740262	81740531	Intergenic	MLT1K|LTR|ERVL-MaLR	-38862	NM_002661	5336	Hs.372303	NM_002661	ENSG00000197943	PLCG2	APLAID|FCAS3|PLC-IV|PLC-gamma-2	phospholipase C gamma 2	protein-coding	13.63
chr2-68	chr2	43402055	43402302	Genebody	intron (NM_001083953, intron 28 of 37)	174967	NR_027251	100129726	Hs.194480	NM_178529	ENSG00000279873	LINC01126	-	long intergenic non-protein coding RNA 1126	ncRNA	13.62
chr22-28	chr22	41468785	41469049	Promoter	promoter-TSS (NM_001098)	-208	NM_001098	50	Hs.643610	NM_001098	ENSG00000100412	ACO2	ACONM|HEL-S-284|ICRD|OCA8|OPA9	aconitase 2	protein-coding	13.62
chr8-41	chr8	103078367	103078632	Intergenic	Intergenic	-42533	NR_145429	379034	Hs.591862	NR_145429		LINC01181	-	long intergenic non-protein coding RNA 1181	ncRNA	13.62
chr17-82	chr17	40096122	40096367	Genebody	intron (NM_021724, intron 4 of 7)	4481	NM_021724	9572	Hs.724	NM_021724	ENSG00000126368	NR1D1	EAR1|REVERBA|REVERBalpha|THRA1|THRAL|ear-1|hRev	nuclear receptor subfamily 1 group D member 1	protein-coding	13.61
chr1-159	chr1	217620806	217621074	Genebody	intron (NM_018040, intron 1 of 9)	10172	NM_018040	55105	Hs.362343	NM_018040	ENSG00000092978	GPATCH2	CT110|GPATC2|PPP1R30|Pfa1	G-patch domain containing 2	protein-coding	13.6
chr20-27	chr20	57483396	57483665	Intergenic	THE1A|LTR|ERVL-MaLR	41337	NM_001269041	140690	Hs.131543	NM_080618	ENSG00000124092	CTCFL	BORIS|CT27|CTCF-T|HMGB1L1|dJ579F20.2	CCCTC-binding factor like	protein-coding	13.6
chr8-61	chr8	124709638	124709907	Genebody	intron (NM_014751, intron 1 of 13)	18735	NM_001282974	9788	Hs.336994	NM_014751	ENSG00000170873	MTSS1	MIM|MIMA|MIMB	MTSS1, I-BAR domain containing	protein-coding	13.6
chr22-49	chr22	23839079	23839347	Promoter	promoter-TSS (NM_198440)	-201	NM_001135751	91319	Hs.593679	NM_198440	ENSG00000099958	DERL3	C22orf14|IZP6|LLN2|derlin-3	derlin 3	protein-coding	13.6
chr19-88	chr19	11482549	11482818	Promoter	TTS (NM_138783)	-1695	NM_032281	1995	Hs.1701	NM_001420	ENSG00000196361	ELAVL3	HUC|HUCL|PLE21	ELAV like RNA binding protein 3	protein-coding	13.6
chr9-41	chr9	112035843	112036090	Intergenic	AluSx|SINE|Alu	103866	NR_039814	100616114		NR_039814	ENSG00000266315	MIR4668	mir-4668	microRNA 4668	ncRNA	13.59
chr19-113	chr19	55408139	55408402	Promoter	promoter-TSS (NM_014501)	-313	NM_014501	27338	Hs.396393	NM_014501	ENSG00000108106	UBE2S	E2-EPF|E2EPF|EPF5	ubiquitin conjugating enzyme E2 S	protein-coding	13.59
chr1-232	chr1	221839868	221840110	Promoter	intron (NR_125989, intron 2 of 3)	677	NR_125989	101929771	Hs.557001	NR_125989	ENSG00000227925	LINC01655	-	long intergenic non-protein coding RNA 1655	ncRNA	13.57
chr19-90	chr19	10963590	10963852	Genebody	MIR|SINE|MIR	2589	NM_001128849	6597	Hs.327527	NM_003072	ENSG00000127616	SMARCA4	BAF190|BAF190A|BRG1|CSS4|MRD16|RTPS2|SNF2|SNF2L4|SNF2LB|SWI2|hSNF2b	SWI/SNF related, matrix associated, actin dependent regulator of chromatin, subfamily a, member 4	protein-coding	13.55
chr8-38	chr8	127210216	127210485	Genebody	intron (NR_108049, intron 1 of 1)	8918	NR_108049	100507056	Hs.343864	NR_108049		CCAT1	CARLO5|CARLo-5|onco-lncRNA-40	colon cancer associated transcript 1 (non-protein coding)	ncRNA	13.55
chr17-108	chr17	28045363	28045632	Genebody	MLT1B|LTR|ERVL-MaLR	2835	NM_016231	51701	Hs.208759	NM_016231	ENSG00000087095	NLK	-	nemo like kinase	protein-coding	13.55
chr7-68	chr7	100867161	100867430	Promoter	promoter-TSS (NM_003302)	-33	NM_003302	7205	Hs.534360	NM_003302	ENSG00000087077	TRIP6	OIP-1|OIP1|TRIP-6|TRIP6i2|ZRP-1	thyroid hormone receptor interactor 6	protein-coding	13.55
chr21-78	chr21	14527231	14527500	Genebody	intron (NM_001286523, intron 1 of 8)	18995	NM_022136	64092	Hs.473341	NM_022136	ENSG00000155307	SAMSN1	HACS1|NASH1|SASH2|SH3D6B|SLy2	SAM domain, SH3 domain and nuclear localization signals 1	protein-coding	13.52
chr11-71	chr11	67587802	67588061	Intergenic	AluSx1|SINE|Alu	4336	NM_000852	2950	Hs.523836	NM_000852	ENSG00000084207	GSTP1	DFN7|FAEES3|GST3|GSTP|HEL-S-22|PI	glutathione S-transferase pi 1	protein-coding	13.52
chr5-84	chr5	116576988	116577248	Genebody	intron (NR_147170, intron 1 of 2)	-2192	NM_020796	57556	Hs.156967	NM_020681	ENSG00000092421	SEMA6A	HT018|SEMA|SEMA6A1|SEMAQ|VIA	semaphorin 6A	protein-coding	13.52
chr10-119	chr10	132560189	132560455	Genebody	L1M4|LINE|L1	22543	NM_005539	3632	Hs.523360	NM_005539	ENSG00000068383	INPP5A	5PTASE	inositol polyphosphate-5-phosphatase A	protein-coding	13.51
chr19-117	chr19	47435189	47435445	Genebody	intron (NM_015063, intron 8 of 9)	-13084	NM_001346148	56917	Hs.380923	NM_020160	ENSG00000105419	MEIS3	MRG2	Meis homeobox 3	protein-coding	13.51
chr9-53	chr9	128072335	128072604	Genebody	intron (NM_001006641, intron 1 of 9)	4269	NM_001330988	114789	Hs.5476	NM_052901	ENSG00000148339	SLC25A25	MCSC|PCSCL|SCAMC-2	solute carrier family 25 member 25	protein-coding	13.5
chr14-70	chr14	68473897	68474161	Genebody	L1ME3Cz|LINE|L1	154758	NR_135816	100996664		NR_135816		LOC100996664	-	uncharacterized LOC100996664	ncRNA	13.48
chr3-62	chr3	195550235	195550503	Intergenic	Intergenic	-6968	NM_006241	5504	Hs.535731	NM_006241	ENSG00000184203	PPP1R2	IPP-2|IPP2|PPP1R2A	protein phosphatase 1 regulatory inhibitor subunit 2	protein-coding	13.47
chr17-114	chr17	46192619	46192867	Promoter	promoter-TSS (NR_034172)	57	NM_001193466	284058	Hs.648744	NM_015443	ENSG00000120071	KANSL1	CENP-36|KDVS|KIAA1267|MSL1v1|NSL1|hMSL1v1	KAT8 regulatory NSL complex subunit 1	protein-coding	13.45
chr5-89	chr5	159207295	159207564	Promoter	intron (NM_001199380, intron 1 of 10)	219	NM_001199382	153830	Hs.349306	NM_144726	ENSG00000145860	RNF145	-	ring finger protein 145	protein-coding	13.42
chr6-56	chr6	36131618	36131887	Promoter	MIR|SINE|MIR	1268	NM_002754	5603	Hs.178695	NM_002754	ENSG00000156711	MAPK13	MAPK 13|MAPK-13|PRKM13|SAPK4|p38delta	mitogen-activated protein kinase 13	protein-coding	13.42
chr6-116	chr6	39226167	39226431	Genebody	intron (NM_003740, intron 1 of 4)	3176	NM_003740	8645	Hs.444448	NM_003740	ENSG00000164626	KCNK5	K2p5.1|KCNK5b|TASK-2|TASK2	potassium two pore domain channel subfamily K member 5	protein-coding	13.4
chr1-155	chr1	26500415	26500683	Intergenic	CpG	28138	NM_005517	3151	Hs.181163	NM_005517	ENSG00000198830	HMGN2	HMG17	high mobility group nucleosomal binding domain 2	protein-coding	13.39
chrY-15	chrY	1535621	1535890	Promoter	intron (NM_178129, intron 1 of 1)	1389	NM_178129	286530	Hs.111377	NM_178129	ENSG00000182162	P2RY8	P2Y8	P2Y receptor family member 8	protein-coding	13.39
chr11-52	chr11	128719088	128719347	Genebody	MIRb|SINE|MIR	-23194	NR_038908	100507392	Hs.657715	NR_038908	ENSG00000254703	SENCR	FLI1-AS1|lncRNA9	smooth muscle and endothelial cell enriched migration/differentiation-associated lncRNA	ncRNA	13.38
chr1-242	chr1	182839962	182840198	Promoter	promoter-TSS (NR_148933)	-489	NR_148933	647070	Hs.191518	NR_148933		LOC647070	-	uncharacterized LOC647070	ncRNA	13.37
chr20-58	chr20	48467671	48467935	Intergenic	MLT1J|LTR|ERVL-MaLR	107892	NR_026958	284749	Hs.299080	NR_026958	ENSG00000235621	LINC00494	-	long intergenic non-protein coding RNA 494	ncRNA	13.37
chr4-71	chr4	36841907	36842155	Intergenic	Intergenic	-159748	NR_134669	100508631	Hs.397553	NR_134669	ENSG00000261761	LOC100508631	-	uncharacterized LOC100508631	ncRNA	13.36
chr9-74	chr9	136950050	136950317	Intergenic	CpG	-2133	NM_178536	286256	Hs.440519	NM_178536	ENSG00000184925	LCN12	-	lipocalin 12	protein-coding	13.35
chr4-74	chr4	23334273	23334531	Intergenic	Intergenic	546890	NM_001330753	10891	Hs.527078	NM_013261	ENSG00000109819	PPARGC1A	LEM6|PGC-1(alpha)|PGC-1alpha|PGC-1v|PGC1|PGC1A|PPARGC1	PPARG coactivator 1 alpha	protein-coding	13.34
chr3-93	chr3	49723313	49723582	Promoter	TTS (NM_001242829)	527	NM_013334	29925	Hs.567488	NM_013334	ENSG00000173540	GMPPB	MDDGA14|MDDGB14|MDDGC14	GDP-mannose pyrophosphorylase B	protein-coding	13.34
chr22-36	chr22	38260398	38260642	Genebody	MIR|SINE|MIR	12144	NM_001195071	25829	Hs.182626	NM_012264	ENSG00000198792	TMEM184B	C22orf5|FM08|HS5O6A|HSPC256	transmembrane protein 184B	protein-coding	13.34
chr14-63	chr14	61662511	61662780	Intergenic	Intergenic	-32756	NM_001530	3091	Hs.597216	NM_001530	ENSG00000100644	HIF1A	HIF-1-alpha|HIF-1A|HIF-1alpha|HIF1|HIF1-ALPHA|MOP1|PASD8|bHLHe78	hypoxia inducible factor 1 subunit alpha	protein-coding	13.34
chr21-83	chr21	6336710	6336952	Intergenic	THE1B|LTR|ERVL-MaLR	-69495	NM_001322047	102724843	Hs.743984	NM_001322047		LOC102724843	-	uncharacterized LOC102724843	protein-coding	13.33
chr14-51	chr14	75258955	75259224	Intergenic	CpG	-19689	NM_005252	2353	Hs.25647	NM_005252	ENSG00000170345	FOS	AP-1|C-FOS|p55	Fos proto-oncogene, AP-1 transcription factor subunit	protein-coding	13.31
chr1-458	chr1	31815872	31816119	Promoter	promoter-TSS (NM_144569)	56	NM_144569	90853	Hs.62604	NM_144569	ENSG00000134668	SPOCD1	PPP1R146	SPOC domain containing 1	protein-coding	13.3
chr13-44	chr13	111185089	111185342	Promoter	intron (NM_001354057, intron 3 of 18)	-1611	NM_001113513	8874	Hs.508738	NM_003899	ENSG00000102606	ARHGEF7	BETA-PIX|COOL-1|COOL1|Nbla10314|P50|P50BP|P85|P85COOL1|P85SPR|PAK3|PIXB	Rho guanine nucleotide exchange factor 7	protein-coding	13.29
chr22-37	chr22	39490213	39490482	Genebody	3' UTR (NM_002409, exon 2 of 2)	3123	NM_001098270	4248	Hs.276808	NM_002409	ENSG00000128268	MGAT3	GNT-III|GNT3	mannosyl (beta-1,4-)-glycoprotein beta-1,4-N-acetylglucosaminyltransferase	protein-coding	13.28
chr2-200	chr2	127128641	127128910	Intergenic	Intergenic	-21448	NM_004305	274	Hs.193163	NM_004305	ENSG00000136717	BIN1	AMPH2|AMPHL|CNM2|SH3P9	bridging integrator 1	protein-coding	13.28
chr5-63	chr5	65481870	65482123	Promoter	promoter-TSS (NR_135689)	-76	NM_197941	11174	Hs.482291	NM_197941	ENSG00000049192	ADAMTS6	ADAM-TS 6|ADAM-TS6|ADAMTS-6	ADAM metallopeptidase with thrombospondin type 1 motif 6	protein-coding	13.27
chr7-62	chr7	155298988	155299254	Promoter	intron (NM_198337, intron 2 of 3)	1349	NM_001346592	3638	Hs.520819	NM_005542	ENSG00000186480	INSIG1	CL6	insulin induced gene 1	protein-coding	13.27
chr19-100	chr19	4791346	4791596	Promoter	promoter-TSS (NM_018708)	-245	NM_018708	55527	Hs.515082	NM_018708	ENSG00000141965	FEM1A	EPRAP	fem-1 homolog A	protein-coding	13.25
chr1-231	chr1	221793615	221793875	Intergenic	Intergenic	46921	NR_125989	101929771	Hs.557001	NR_125989	ENSG00000227925	LINC01655	-	long intergenic non-protein coding RNA 1655	ncRNA	13.24
chr21-63	chr21	7042659	7042889	Intergenic	Intergenic	-6085	NM_001322036	102724951	Hs.743984	NM_001322036		LOC102724951	-	uncharacterized LOC102724951	protein-coding	13.24
chr10-104	chr10	68328341	68328582	Genebody	intron (NM_001033083, intron 1 of 8)	-3232	NM_001322445	3189	Hs.643472	NM_012207	ENSG00000096746	HNRNPH3	2H9|HNRPH3	heterogeneous nuclear ribonucleoprotein H3	protein-coding	13.24
chr19-91	chr19	55461553	55461822	Promoter	promoter-TSS (NM_001136201)	-5	NM_001136202	79763	Hs.467306	NM_024710	ENSG00000063241	ISOC2	-	isochorismatase domain containing 2	protein-coding	13.23
chrX-33	chrX	101623019	101623288	Promoter	promoter-TSS (NM_177947)	23	NM_016607	51566	Hs.592225	NM_016607	ENSG00000102401	ARMCX3	ALEX3|GASP6|dJ545K15.2	armadillo repeat containing, X-linked 3	protein-coding	13.23
chr3-57	chr3	88150375	88150621	Promoter	promoter-TSS (NM_001195308)	-632	NM_001195308	8545	Hs.444818	NM_003663	ENSG00000163320	CGGBP1	CGGBP|p20-CGGBP	CGG triplet repeat binding protein 1	protein-coding	13.2
chrX-27	chrX	1535623	1535892	Promoter	intron (NM_178129, intron 1 of 1).2	1387	NM_178129	286530	Hs.111377	NM_178129	ENSG00000182162	P2RY8	P2Y8	P2Y receptor family member 8	protein-coding	13.2
chr12-74	chr12	121991339	121991600	Genebody	MER5A|DNA|hAT-Charlie	-30417	NM_020993	605	Hs.530970	NM_020993	ENSG00000110987	BCL7A	BCL7	BCL tumor suppressor 7A	protein-coding	13.19
chr7-58	chr7	133082005	133082274	Promoter	promoter-TSS (NM_001317177)	19	NM_001317177	54927	Hs.655010	NM_017812	ENSG00000106554	CHCHD3	MINOS3|Mic19|PPP1R22	coiled-coil-helix-coiled-coil-helix domain containing 3	protein-coding	13.15
chr13-43	chr13	23889291	23889560	Promoter	promoter-TSS (NM_001135816)	-14	NM_001348113	542767	Hs.642624	NM_001014442		PCOTH	C1QTNF9B-AS1	Pro-X-Gly collagen triple helix like repeat containing	protein-coding	13.15
chr10-68	chr10	11175992	11176259	Genebody	intron (NM_001326339, intron 2 of 11)	11095	NM_001025076	10659	Hs.309288	NM_006561	ENSG00000048740	CELF2	BRUNOL3|CELF-2|CUG-BP2|CUGBP2|ETR-3|ETR3|NAPOR	CUGBP Elav-like family member 2	protein-coding	13.14
chr13-28	chr13	79522686	79522953	Genebody	MLT1G3|LTR|ERVL-MaLR	-41588	NR_046685	100874208	Hs.602801	NR_046685	ENSG00000232132	NDFIP2-AS1	-	NDFIP2 antisense RNA 1	ncRNA	13.14
chr17-98	chr17	19977854	19978099	Promoter	promoter-TSS (NM_007202)	-120	NM_007202	11216	Hs.642676	NM_007202	ENSG00000108599	AKAP10	AKAP-10|D-AKAP-2|D-AKAP2|PRKA10	A-kinase anchoring protein 10	protein-coding	13.14
chr10-123	chr10	38356697	38356966	Promoter	intron (NR_003086, intron 1 of 7)	451	NR_003086	158160	Hs.652484	NM_182829	ENSG00000099251	HSD17B7P2	HSD17B7|Hsd17b_2|bA291L22.1	hydroxysteroid 17-beta dehydrogenase 7 pseudogene 2	pseudo	13.12
chr5-67	chr5	103260914	103261183	Promoter	intron (NM_001316968, intron 1 of 2)	1691	NM_001316968	90355	Hs.482976	NM_033211	ENSG00000181751	C5orf30	-	chromosome 5 open reading frame 30	protein-coding	13.12
chr17-84	chr17	2030006	2030275	Promoter	promoter-TSS (NM_001346574)	28	NM_001383	1801	Hs.513856	NM_001383	ENSG00000108963	DPH1	DEDSSH|DPH2L|DPH2L1|OVCA1	diphthamide biosynthesis 1	protein-coding	13.09
chr21-69	chr21	7478919	7479177	Intergenic	Intergenic	32844	NM_001322975	102723360	Hs.743984	NM_001322975		LOC102723360	-	uncharacterized LOC102723360	protein-coding	13.09
chr8-74	chr8	141095444	141095713	Intergenic	Intergenic	-33034	NM_014957	22898	Hs.18166	NM_014957	ENSG00000105339	DENND3	-	DENN domain containing 3	protein-coding	13.09
chr1-180	chr1	172818315	172818584	Intergenic	Intergenic	159441	NM_000639	356	Hs.2007	NM_000639	ENSG00000117560	FASLG	ALPS1B|APT1LG1|APTL|CD178|CD95-L|CD95L|FASL|TNFSF6|TNLG1A	Fas ligand	protein-coding	13.09
chr11-49	chr11	46594002	46594263	Promoter	promoter-TSS (NM_001267783)	-63	NM_001267782	55626	Hs.654644	NM_017749	ENSG00000110497	AMBRA1	DCAF3|WDR94	autophagy and beclin 1 regulator 1	protein-coding	13.08
chr16-125	chr16	70801032	70801292	Promoter	promoter-TSS (NM_001351157)	14	NM_018052	55697	Hs.445061	NM_018052	ENSG00000103043	VAC14	ArPIKfyve|TAX1BP2|TRX	Vac14, PIKFYVE complex component	protein-coding	13.08
chr20-32	chr20	53652393	53652628	Intergenic	Intergenic	44156	NR_134576	105372672	Hs.259350	NR_134576	ENSG00000235415	LOC105372672	-	uncharacterized LOC105372672	ncRNA	13.08
chr15-47	chr15	58332249	58332518	Intergenic	Intergenic	-99593	NM_000236	3990	Hs.654472	NM_000236	ENSG00000166035	LIPC	HDLCQ12|HL|HTGL|LIPH	lipase C, hepatic type	protein-coding	13.07
chr13-32	chr13	113186335	113186604	Genebody	intron (NM_001127202, intron 7 of 13)	-21724	NM_001278513	8451	Hs.339735	NM_003589	ENSG00000139842	CUL4A	-	cullin 4A	protein-coding	13.07
chr7-138	chr7	74628182	74628440	Intergenic	Intergenic	-29354	NM_001518	2969	Hs.647041	NM_001518	ENSG00000263001	GTF2I	BAP135|BTKAP1|DIWS|GTFII-I|IB291|SPIN|TFII-I|WBS|WBSCR6	general transcription factor IIi	protein-coding	13.07
chr3-79	chr3	196643182	196643451	Genebody	intron (NM_198565, intron 1 of 2)	3620	NM_198565	375387	Hs.702186	NM_198565	ENSG00000174004	NRROS	ELLP3030|GARPL1|LRRC33|UNQ3030	negative regulator of reactive oxygen species	protein-coding	13.07
chr1-188	chr1	9428987	9429256	Promoter	promoter-TSS (NR_104623)	-125	NR_104622	100506022	Hs.131775	NR_104622	ENSG00000284693	LOC100506022	-	uncharacterized LOC100506022	ncRNA	13.07
chr19-101	chr19	45584480	45584749	Promoter	CpG	250	NM_025136	80207	Hs.466945	NM_025136	ENSG00000125741	OPA3	MGA3	OPA3, outer mitochondrial membrane lipid metabolism regulator	protein-coding	13.04
chr4-117	chr4	78629927	78630193	Intergenic	MER77B|LTR|ERVL	-15934	NR_038307	100505702	Hs.235795	NR_038303		LINC01094	-	long intergenic non-protein coding RNA 1094	ncRNA	13.02
chr22-32	chr22	39442294	39442549	Intergenic	AluSz6|SINE|Alu	10261	NR_040535	100506472	Hs.729080	NR_040535		LOC100506472	-	uncharacterized LOC100506472	ncRNA	12.99
chr11-54	chr11	18769793	18770062	Genebody	intron (NM_001278239, intron 1 of 13)	21915	NM_001039970	84867	Hs.79092	NM_006906	ENSG00000110786	PTPN5	PTPSTEP|STEP|STEP61	protein tyrosine phosphatase, non-receptor type 5	protein-coding	12.99
chr10-93	chr10	69222725	69222988	Genebody	intron (NM_025130, intron 1 of 17)	2553	NM_025130	80201	Hs.522988	NM_025130	ENSG00000156510	HKDC1	-	hexokinase domain containing 1	protein-coding	12.98
chr20-53	chr20	36098416	36098685	Genebody	MLT1C|LTR|ERVL-MaLR	5840	NM_001258330	2036	Hs.437422	NM_012156	ENSG00000088367	EPB41L1	4.1N|MRD11	erythrocyte membrane protein band 4.1 like 1	protein-coding	12.96
chr5-80	chr5	149344826	149345095	Promoter	promoter-TSS (NM_152407)	-454	NM_152407	134266	Hs.511816	NM_152407	ENSG00000164284	GRPEL2	Mt-GrpE#2	GrpE like 2, mitochondrial	protein-coding	12.96
chr3-92	chr3	127890588	127890852	Intergenic	LTR10F|LTR|ERV1	-32339	NM_207335	166348	Hs.132087	NM_207335	ENSG00000187715	KBTBD12	KLHDC6	kelch repeat and BTB domain containing 12	protein-coding	12.96
chr8-102	chr8	135525168	135525437	Genebody	L1ME2z|LINE|L1	67837	NM_006558	10656	Hs.444558	NM_006558	ENSG00000131773	KHDRBS3	Etle|SALP|SLM-2|SLM2|T-STAR|TSTAR|etoile	KH RNA binding domain containing, signal transduction associated 3	protein-coding	12.96
chr16-117	chr16	68470553	68470822	Intergenic	Intergenic	-22181	NM_018667	55512	Hs.368421	NM_018667	ENSG00000103056	SMPD3	NSMASE2	sphingomyelin phosphodiesterase 3	protein-coding	12.96
chr16-142	chr16	84585898	84586153	Genebody	MLT1K|LTR|ERVL-MaLR	32071	NM_021149	23406	Hs.289092	NM_021149	ENSG00000103187	COTL1	CLP	coactosin like F-actin binding protein 1	protein-coding	12.94
chr11-63	chr11	65013982	65014231	Promoter	promoter-TSS (NM_001667)	-7	NM_001199745	402	Hs.502836	NM_001667	ENSG00000213465	ARL2	ARFL2	ADP ribosylation factor like GTPase 2	protein-coding	12.93
chr3-70	chr3	195907897	195908166	Promoter	promoter-TSS (NR_145450)	-45	NR_145450	100128262	Hs.605240	NR_145450		TNK2-AS1	-	TNK2 antisense RNA 1	ncRNA	12.93
chr9-85	chr9	130240659	130240928	Intergenic	MLT1J|LTR|ERVL-MaLR	-25086	NM_001291815	256158	Hs.32194	NM_144655	ENSG00000148357	HMCN2	-	hemicentin 2	protein-coding	12.93
chr16-116	chr16	53091890	53092159	Genebody	intron (NM_025134, intron 1 of 38)	37031	NM_025134	80205	Hs.59159	NM_015287	ENSG00000177200	CHD9	AD013|CHD-9|CReMM|KISH2|PRIC320	chromodomain helicase DNA binding protein 9	protein-coding	12.93
chr18-25	chr18	45967173	45967439	Promoter	promoter-TSS (NM_020964)	33	NM_020964	57724	Hs.514843	NM_020964	ENSG00000152223	EPG5	HEEW1|KIAA1632|VICIS	ectopic P-granules autophagy protein 5 homolog	protein-coding	12.92
chr21-151	chr21	43776190	43776456	Promoter	promoter-TSS (NM_000100)	52	NM_000100	1476	Hs.695	NM_000100	ENSG00000160213	CSTB	CPI-B|CST6|EPM1|EPM1A|PME|STFB|ULD	cystatin B	protein-coding	12.92
chr6-111	chr6	118899975	118900241	Genebody	intron (NM_014034, intron 1 of 3)	6031	NM_014034	25842	Hs.292316	NM_014034	ENSG00000111875	ASF1A	CGI-98|CIA|HSPC146	anti-silencing function 1A histone chaperone	protein-coding	12.92
chr2-86	chr2	143129253	143129499	Promoter	promoter-TSS (NM_018460)	46	NM_018460	55843	Hs.171011	NM_018460	ENSG00000075884	ARHGAP15	BM046	Rho GTPase activating protein 15	protein-coding	12.91
chr14-59	chr14	68685735	68685991	Intergenic	Intergenic	-57076	NR_135816	100996664		NR_135816		LOC100996664	-	uncharacterized LOC100996664	ncRNA	12.91
chr3-75	chr3	129690444	129690705	Promoter	MLT1J1|LTR|ERVL-MaLR	-1842	NM_001349272	23023	Hs.477547	NM_015008	ENSG00000172765	TMCC1	-	transmembrane and coiled-coil domain family 1	protein-coding	12.91
chr10-122	chr10	72295891	72296157	Intergenic	Intergenic	22105	NM_019058	54541	Hs.744875	NM_019058	ENSG00000168209	DDIT4	Dig2|REDD-1|REDD1	DNA damage inducible transcript 4	protein-coding	12.89
chr2-157	chr2	81645794	81646056	Intergenic	MER101B|LTR|ERV1	-178979	NR_110161	100507201	Hs.98589	NR_110161	ENSG00000235519	LINC01815	-	long intergenic non-protein coding RNA 1815	ncRNA	12.89
chr2-137	chr2	98464901	98465170	Genebody	MIRb|SINE|MIR	19025	NM_001351428	3631	Hs.469386	NM_001566	ENSG00000040933	INPP4A	INPP4|TVAS1	inositol polyphosphate-4-phosphatase type I A	protein-coding	12.88
chr15-36	chr15	43253585	43253854	Genebody	intron (NM_201631, intron 4 of 12)	13138	NM_004245	9333	Hs.129719	NM_004245	ENSG00000104055	TGM5	PSS2|TGASE5|TGASEX|TGM6|TGMX|TGX	transglutaminase 5	protein-coding	12.88
chr4-63	chr4	99950492	99950760	Promoter	promoter-TSS (NM_002106)	132	NR_125923	256880	Hs.448554	NR_002799	ENSG00000245322	LOC256880	-	uncharacterized LOC256880	ncRNA	12.87
chr7-72	chr7	128933273	128933541	Intergenic	Intergenic	-3625	NM_001347928	3663	Hs.521181	NM_032643	ENSG00000128604	IRF5	SLEB10	interferon regulatory factor 5	protein-coding	12.87
chr11-66	chr11	121292475	121292744	Promoter	promoter-TSS (NM_006918)	-70	NM_006918	6309	Hs.287749	NM_006918	ENSG00000109929	SC5D	ERG3|S5DES|SC5DL	sterol-C5-desaturase	protein-coding	12.85
chr17-83	chr17	68457685	68457954	Promoter	promoter-TSS (NM_001320772)	-295	NR_135470	55062	Hs.463964	NM_017983	ENSG00000070540	WIPI1	ATG18|ATG18A|WIPI49	WD repeat domain, phosphoinositide interacting 1	protein-coding	12.85
chr2-115	chr2	195561358	195561613	Intergenic	MIR|SINE|MIR	-95323	NM_001127257	57181	Hs.650158	NM_020342	ENSG00000196950	SLC39A10	LZT-Hs2	solute carrier family 39 member 10	protein-coding	12.85
chr12-70	chr12	24998250	24998505	Promoter	promoter-TSS (NM_001101339)	815	NM_001321724	645177	Hs.569157	NM_001321724		LOC645177	-	uncharacterized LOC645177	protein-coding	12.85
chr18-28	chr18	55268292	55268537	Genebody	intron (NM_001348217, intron 10 of 18)	34207	NM_001243236	6925	Hs.605153	NM_003199	ENSG00000196628	TCF4	E2-2|FECD3|ITF-2|ITF2|PTHS|SEF-2|SEF2|SEF2-1|SEF2-1A|SEF2-1B|SEF2-1D|TCF-4|bHLHb19	transcription factor 4	protein-coding	12.84
chr15-39	chr15	82806149	82806418	Promoter	promoter-TSS (NM_001007122)	-213	NM_001007122	123722	Hs.719372	NM_001007122	ENSG00000186628	FSD2	SPRYD1	fibronectin type III and SPRY domain containing 2	protein-coding	12.83
chrX-35	chrX	129779731	129780000	Promoter	promoter-TSS (NM_018990)	-51	NM_018990	54440	Hs.61469	NM_018990	ENSG00000122122	SASH3	753P9|CXorf9|HACS2|SH3D6C|SLY	SAM and SH3 domain containing 3	protein-coding	12.83
chr13-25	chr13	33182825	33183094	Genebody	L2c|LINE|L2	3120	NM_001243466	90627	Hs.156551	NM_052851	ENSG00000133121	STARD13	ARHGAP37|DLC2|GT650|LINC00464	StAR related lipid transfer domain containing 13	protein-coding	12.83
chr20-61	chr20	968194	968463	Genebody	MLT1J|LTR|ERVL-MaLR	33936	NM_001040007	343637	Hs.444980	NM_001029871	ENSG00000101282	RSPO4	C20orf182|CRISTIN4	R-spondin 4	protein-coding	12.83
chr6-73	chr6	37556231	37556478	Promoter	promoter-TSS (NR_039669)	-932	NR_039669	100616413		NR_039669	ENSG00000263926	MIR4462	-	microRNA 4462	ncRNA	12.83
chr10-324	chr10	1548654	1548920	Genebody	intron (NR_152792, intron 2 of 2)	2027	NR_152792	642394	Hs.568831	NM_001098830	ENSG00000205696	ADARB2-AS1	C10orf109|NCRNA00168	ADARB2 antisense RNA 1	ncRNA	12.81
chr1-288	chr1	154170904	154171162	Genebody	intron (NM_001043352, intron 5 of 7)	7188	NM_001278191	7170	Hs.535581	NM_152263	ENSG00000143549	TPM3	CAPM1|CFTD|HEL-189|HEL-S-82p|NEM1|OK/SW-cl.5|TM-5|TM3|TM30|TM30nm|TM5|TPM3nu|TPMsk3|TRK|hscp30	tropomyosin 3	protein-coding	12.81
chr12-79	chr12	121888489	121888754	Promoter	promoter-TSS (NM_001261400)	-10	NM_001171993	3242	Hs.2899	NM_002150	ENSG00000158104	HPD	4-HPPD|4HPPD|GLOD3|HPPDASE|PPD	4-hydroxyphenylpyruvate dioxygenase	protein-coding	12.8
chr5-92	chr5	96885960	96886211	Genebody	MIRb|SINE|MIR	10146	NM_001329229	64167	Hs.482910	NM_022350	ENSG00000164308	ERAP2	L-RAP|LRAP	endoplasmic reticulum aminopeptidase 2	protein-coding	12.8
chr1-158	chr1	161117395	161117659	Promoter	promoter-TSS (NM_005600)	-545	NM_005600	4817	Hs.146406	NM_005600	ENSG00000158793	NIT1	-	nitrilase 1	protein-coding	12.8
chr1-214	chr1	155910869	155911138	Promoter	promoter-TSS (NM_001256821)	-88	NM_001256821	6016	Hs.491234	NM_006912	ENSG00000143622	RIT1	NS8|RIBB|RIT|ROC1	Ras like without CAAX 1	protein-coding	12.77
chr3-76	chr3	128725936	128726196	Promoter	promoter-TSS (NM_004637)	-70	NM_004637	7879	Hs.684374	NM_004637	ENSG00000075785	RAB7A	PRO2706|RAB7	RAB7A, member RAS oncogene family	protein-coding	12.77
chr3-69	chr3	178669047	178669316	Genebody	intron (NM_001278911, intron 1 of 4)	110481	NM_001278911	10242	Hs.478368	NM_005832	ENSG00000197584	KCNMB2	-	potassium calcium-activated channel subfamily M regulatory beta subunit 2	protein-coding	12.75
chr11-73	chr11	8594191	8594460	Promoter	promoter-TSS (NM_001289061)	-36	NM_001289058	65975	Hs.501833	NM_030906	ENSG00000130413	STK33	-	serine/threonine kinase 33	protein-coding	12.75
chr3-96	chr3	187130781	187131050	Genebody	intron (NM_052969, intron 1 of 2)	8608	NM_052969	116832	Hs.647900	NM_052969	ENSG00000163923	RPL39L	L39-2|RPL39L1	ribosomal protein L39 like	protein-coding	12.75
chr7-92	chr7	44606993	44607250	Promoter	CpG	599	NM_001003941	4967	Hs.488181	NM_002541	ENSG00000105953	OGDH	AKGDH|E1k|OGDC	oxoglutarate dehydrogenase	protein-coding	12.75
chr6-57	chr6	64266572	64266825	Genebody	intron (NM_001292009, intron 30 of 43)	620172	NM_015153	23469	Hs.348921	NM_015153	ENSG00000118482	PHF3	-	PHD finger protein 3	protein-coding	12.72
chr9-66	chr9	129584128	129584381	Intergenic	MLT1J|LTR|ERVL-MaLR	-24630	NM_001286796	28989	Hs.744027	NM_014064	ENSG00000148335	NTMT1	AD-003|C9orf32|HOMT1A|METTL11A|NRMT|NRMT1|NTM1A	N-terminal Xaa-Pro-Lys N-methyltransferase 1	protein-coding	12.72
chr10-96	chr10	98446838	98447099	Promoter	promoter-TSS (NM_000195)	-5	NM_001322482	3257	Hs.404568	NM_000195	ENSG00000107521	HPS1	BLOC3S1|HPS	HPS1, biogenesis of lysosomal organelles complex 3 subunit 1	protein-coding	12.72
chr6-108	chr6	33297601	33297854	Promoter	intron (NM_001243738, intron 1 of 16).2	1661	NM_001243738	5863	Hs.509622	NM_004761	ENSG00000237441	RGL2	HKE1.5|KE1.5|RAB2L	ral guanine nucleotide dissociation stimulator like 2	protein-coding	12.72
chr5-61	chr5	18698222	18698489	Intergenic	LTR13_|LTR|ERVK	891081	NR_134286	646241	Hs.407197	NR_134286		LINC02223	-	long intergenic non-protein coding RNA 2223	ncRNA	12.71
chrX-38	chrX	1391617	1391884	Promoter	CpG	396	NM_001636	293	Hs.350927	NM_001636	ENSG00000169100	SLC25A6	AAC3|ANT|ANT 2|ANT 3|ANT3|ANT3Y	solute carrier family 25 member 6	protein-coding	12.71
chr19-94	chr19	10759795	10760058	Genebody	intron (NM_001005360, intron 2 of 20)	-20328	NR_039903	100616425		NR_039903	ENSG00000265879	MIR4748	mir-4748	microRNA 4748	ncRNA	12.71
chr10-84	chr10	43397196	43397462	Promoter	promoter-TSS (NM_001098208)	17	NM_001098207	3185	Hs.808	NM_004966	ENSG00000169813	HNRNPF	HNRPF|OK/SW-cl.23|mcs94-1	heterogeneous nuclear ribonucleoprotein F	protein-coding	12.7
chr22-41	chr22	46421388	46421657	Genebody	intron (NM_014246, intron 5 of 34)	86121	NR_104240	55687	Hs.439524	NM_018006	ENSG00000100416	TRMU	LCAL3|MTO2|MTU1|TRMT|TRMT1	tRNA 5-methylaminomethyl-2-thiouridylate methyltransferase	protein-coding	12.69
chr12-52	chr12	26114439	26114708	Intergenic	CpG	10497	NM_030762	79365	Hs.177841	NM_030762	ENSG00000123095	BHLHE41	BHLHB3|DEC2|SHARP1|hDEC2	basic helix-loop-helix family member e41	protein-coding	12.69
chr9-43	chr9	129824160	129824423	Promoter	promoter-TSS (NM_000113)	-129	NM_000113	1861	Hs.534312	NM_000113	ENSG00000136827	TOR1A	DQ2|DYT1	torsin family 1 member A	protein-coding	12.68
chr7-94	chr7	101252347	101252614	Intergenic	CpG	-7390	NM_016068	51024	Hs.423968	NM_016068	ENSG00000214253	FIS1	CGI-135|TTC11	fission, mitochondrial 1	protein-coding	12.68
chr11-80	chr11	59556236	59556494	Intergenic	Intergenic	38793	NR_036120	100422880		NR_036120	ENSG00000264559	MIR3162	mir-3162	microRNA 3162	ncRNA	12.67
chrX-31	chrX	44872921	44873189	Promoter	promoter-TSS (NM_001291416)	-120	NM_021140	7403	Hs.522616	NM_021140	ENSG00000147050	KDM6A	KABUK2|UTX|bA386N14.2	lysine demethylase 6A	protein-coding	12.66
chr17-180	chr17	82603033	82603301	Genebody	3' UTR (NM_004514, exon 9 of 9)	45368	NM_019613	56270	Hs.132161	NM_019613	ENSG00000141580	WDR45B	WDR45L|WIPI-3|WIPI3	WD repeat domain 45B	protein-coding	12.66
chr15-34	chr15	77409781	77410050	Genebody	MIR|SINE|MIR	10189	NM_024776	79834	Hs.9587	NM_024776	ENSG00000173517	PEAK1	SGK269	pseudopodium enriched atypical kinase 1	protein-coding	12.66
chr16-98	chr16	88967986	88968229	Genebody	intron (NM_005187, intron 1 of 11)	8989	NM_005187	863	Hs.513811	NM_005187	ENSG00000129993	CBFA2T3	ETO2|MTG16|MTGR2|RUNX1T3|ZMYND4	CBFA2/RUNX1 translocation partner 3	protein-coding	12.65
chr16-136	chr16	19555597	19555863	Promoter	exon (NM_020314, exon 1 of 31)	315	NM_001300743	57020	Hs.654964	NM_020314	ENSG00000103544	VPS35L	C16orf62	VPS35 endosomal protein sorting factor like	protein-coding	12.64
chr1-198	chr1	39799227	39799484	Intergenic	Intergenic	10379	NR_135805	101929536	Hs.552820	NR_135805	ENSG00000261798	LOC101929536	-	uncharacterized LOC101929536	ncRNA	12.64
chr19-92	chr19	18341301	18341561	Promoter	intron (NM_001329477, intron 1 of 3)	844	NM_001308366	54858	Hs.131776	NM_017712	ENSG00000130517	PGPEP1	PAP-I|PGI|PGP|PGP-I|PGPI|Pcp	pyroglutamyl-peptidase I	protein-coding	12.63
chr2-122	chr2	26243053	26243303	Promoter	MIR3|SINE|MIR	1548	NM_000182	3030	Hs.516032	NM_000182	ENSG00000084754	HADHA	ECHA|GBP|HADH|LCEH|LCHAD|MTPA|TP-ALPHA	hydroxyacyl-CoA dehydrogenase trifunctional multienzyme complex subunit alpha	protein-coding	12.62
chr2-91	chr2	86035987	86036256	Genebody	intron (NM_015425, intron 27 of 33)	70034	NM_015425	25885	Hs.531818	NM_015425	ENSG00000068654	POLR1A	A190|AFDCIN|RPA1|RPA194|RPO1-4|RPO14	RNA polymerase I subunit A	protein-coding	12.61
chr5-70	chr5	173036014	173036271	Intergenic	Intergenic	15416	NR_002988	677841	Hs.692720	NR_002988	ENSG00000212402	SNORA74B	U19-2	small nucleolar RNA, H/ACA box 74B	snoRNA	12.61
chr9-62	chr9	127970463	127970723	Genebody	intron (NM_001035254, intron 1 of 10)	9940	NM_001035254	399665	Hs.535972	NM_203305	ENSG00000167106	FAM102A	C9orf132|EEIG1|SYM-3A|bA203J24.7	family with sequence similarity 102 member A	protein-coding	12.6
chrX-32	chrX	54529680	54529939	Promoter	promoter-TSS (NM_019067)	-402	NM_001184819	54552	Hs.654677	NM_019067	ENSG00000130119	GNL3L	GNL3B	G protein nucleolar 3 like	protein-coding	12.6
chr15-42	chr15	88638786	88639050	Promoter	5' UTR (NM_001303237, exon 1 of 4)	175	NM_002201	3669	Hs.459265	NM_002201	ENSG00000172183	ISG20	CD25|HEM45	interferon stimulated exonuclease gene 20	protein-coding	12.6
chr15-45	chr15	85330167	85330404	Intergenic	MER5A1|DNA|hAT-Charlie	-50311	NR_106993	102465803		NR_106993	ENSG00000284160	MIR7706	hsa-mir-7706	microRNA 7706	ncRNA	12.58
chr9-89	chr9	137534905	137535174	Genebody	MER58B|DNA|hAT-Charlie	15530	NM_152286	375775	Hs.294147	NM_152286	ENSG00000130653	PNPLA7	C9orf111|NTE-R1|NTEL1	patatin like phospholipase domain containing 7	protein-coding	12.58
chr7-81	chr7	48052872	48053141	Genebody	intron (NM_001267866, intron 6 of 6)	17495	NM_001267866	136288	Hs.258357	NM_001100159	ENSG00000164746	C7orf57	-	chromosome 7 open reading frame 57	protein-coding	12.58
chr20-37	chr20	45935233	45935497	Promoter	intron (NM_022104, intron 1 of 16)	687	NM_022104	63935	Hs.472856	NM_022104	ENSG00000100982	PCIF1	C20orf67|PPP1R121	PDX1 C-terminal inhibiting factor 1	protein-coding	12.58
chr15-56	chr15	101265075	101265334	Intergenic	Intergenic	12316	NM_203472	55829	Hs.32148	NM_018445	ENSG00000131871	SELENOS	AD-015|ADO15|SBBI8|SELS|SEPS1|VIMP	selenoprotein S	protein-coding	12.57
chr16-87	chr16	29594301	29594570	Promoter	intron (NR_135305, intron 1 of 13)	657	NR_135305	440354	Hs.552700	NR_002473		SMG1P2	-	SMG1 pseudogene 2	pseudo	12.56
chr7-161	chr7	13991453	13991722	Promoter	promoter-TSS (NM_001163149)	-162	NM_001163148	2115	Hs.22634	NM_004956	ENSG00000006468	ETV1	ER81	ETS variant 1	protein-coding	12.56
chr3-85	chr3	113051331	113051583	Intergenic	Intergenic	-31724	NM_001319111	25871	Hs.591288	NM_015412	ENSG00000163608	NEPRO	C3orf17|NET17	nucleolus and neural progenitor protein	protein-coding	12.55
chr2-163	chr2	197889056	197889312	Genebody	MIR3|SINE|MIR	84482	NM_006226	5334	Hs.153322	NM_006226	ENSG00000115896	PLCL1	PLCE|PLCL|PLDL1|PPP1R127|PRIP	phospholipase C like 1 (inactive)	protein-coding	12.55
chr18-26	chr18	63078395	63078664	Intergenic	L1MB8|LINE|L1	240851	NM_000633	596	Hs.150749	NM_000633	ENSG00000171791	BCL2	Bcl-2|PPP1R50	BCL2, apoptosis regulator	protein-coding	12.53
chr8-54	chr8	37631625	37631886	Intergenic	Intergenic	-63996	NM_025069	80139	Hs.288042	NM_025069	ENSG00000183779	ZNF703	NLZ1|ZEPPO1|ZNF503L|ZPO1	zinc finger protein 703	protein-coding	12.53
chr5-123	chr5	6404178	6404439	Intergenic	Intergenic	-25782	NM_032286	84246	Hs.13885	NM_032286	ENSG00000133398	MED10	L6|NUT2|TRG20	mediator complex subunit 10	protein-coding	12.53
chr1-218	chr1	226703571	226703820	Genebody	intron (NM_002221, intron 2 of 7)	-28627	NR_103784	100506443	Hs.664293	NR_103784		ITPKB-IT1	-	ITPKB intronic transcript 1	ncRNA	12.52
chr8-50	chr8	75753450	75753706	Intergenic	MIRc|SINE|MIR	213610	NM_004133	3174	Hs.241529	NM_004133	ENSG00000164749	HNF4G	NR2A2|NR2A3	hepatocyte nuclear factor 4 gamma	protein-coding	12.52
chr5-83	chr5	1800540	1800799	Promoter	promoter-TSS (NM_032479)	-713	NM_004553	4726	Hs.408257	NM_004553	ENSG00000145494	NDUFS6	CI-13kA|CI-13kD-A|CI13KDA	NADH:ubiquinone oxidoreductase subunit S6	protein-coding	12.51
chr10-82	chr10	80472265	80472514	Genebody	L1MC4|LINE|L1	4126	NM_001351271	81619	Hs.718943	NM_030927	ENSG00000108219	TSPAN14	DC-TM4F2|TM4SF14	tetraspanin 14	protein-coding	12.49
chr17-179	chr17	45353130	45353399	Intergenic	Intergenic	-36200	NM_003954	9020	Hs.404183	NM_003954	ENSG00000006062	MAP3K14	FTDCR1B|HS|HSNIK|NIK	mitogen-activated protein kinase kinase kinase 14	protein-coding	12.48
chr5-135	chr5	80399529	80399798	Intergenic	MLT1I|LTR|ERVL-MaLR	-8350	NR_146174	9765	Hs.482660	NM_014733	ENSG00000039319	ZFYVE16	PPP1R69	zinc finger FYVE-type containing 16	protein-coding	12.48
chr1-230	chr1	162791055	162791324	Promoter	intron (NM_001304512, intron 1 of 3)	487	NM_001304512	51478	Hs.492925	NM_016371	ENSG00000132196	HSD17B7	PRAP|SDR37C1	hydroxysteroid 17-beta dehydrogenase 7	protein-coding	12.48
chr3-168	chr3	100641496	100641757	Genebody	LTR24B|LTR|ERV1	6088	NM_001308362	84873	Hs.334511	NM_032787	ENSG00000144820	ADGRG7	GPR128	adhesion G protein-coupled receptor G7	protein-coding	12.47
chr20-34	chr20	63980281	63980531	Promoter	promoter-TSS (NM_080621)	-672	NM_012469	24148	Hs.31334	NM_012469	ENSG00000101161	PRPF6	ANT-1|ANT1|C20orf14|Prp6|RP60|SNRNP102|TOM|U5-102K|hPrp6	pre-mRNA processing factor 6	protein-coding	12.47
chr14-44	chr14	89305285	89305551	Genebody	intron (NM_001085471, intron 3 of 6)	111692	NM_005197	1112	Hs.434286	NM_005197	ENSG00000053254	FOXN3	C14orf116|CHES1|PRO1635	forkhead box N3	protein-coding	12.46
chr1-213	chr1	41699039	41699302	Genebody	intron (NM_001127714, intron 1 of 7)	-214487	NR_126098	1907	Hs.1407	NM_001956	ENSG00000127129	EDN2	ET-2|ET2|PPET2	endothelin 2	protein-coding	12.46
chr3-61	chr3	15205841	15206096	Promoter	promoter-TSS (NM_014296)	-9	NR_027927	344875	Hs.722756	NR_027927	ENSG00000230524	COL6A4P1	COL6A4|COL6A4P|DIVA|DVWA|VWA6	collagen type VI alpha 4 pseudogene 1	pseudo	12.43
chr19-98	chr19	45971994	45972260	Promoter	intron (NM_002516, intron 1 of 3)	1272	NM_002516	4858	Hs.375439	NM_002516	ENSG00000104967	NOVA2	ANOVA|NOVA3	NOVA alternative splicing regulator 2	protein-coding	12.43
chr20-56	chr20	33779058	33779322	Genebody	MSTA|LTR|ERVL-MaLR	31909	NR_110623	101929746	Hs.504633	NR_110623	ENSG00000230753	ZNF341-AS1	-	ZNF341 antisense RNA 1	ncRNA	12.39
chr5-91	chr5	95646580	95646833	Promoter	promoter-TSS (NM_001131065)	-71	NM_001131066	317671	Hs.399758	NM_173362	ENSG00000175449	RFESD	-	Rieske Fe-S domain containing	protein-coding	12.38
chr20-46	chr20	23361718	23361987	Promoter	promoter-TSS (NM_022482)	-280	NM_022482	64412	Hs.709462	NM_022482	ENSG00000125812	GZF1	JLSM|ZBTB23|ZNF336	GDNF inducible zinc finger protein 1	protein-coding	12.37
chr17-170	chr17	50148413	50148652	Promoter	intron (NM_032595, intron 1 of 9)	1985	NM_032595	84687	Hs.514323	NM_032595	ENSG00000108819	PPP1R9B	PPP1R6|PPP1R9|SPINO|Spn	protein phosphatase 1 regulatory subunit 9B	protein-coding	12.35
chr19-137	chr19	5627522	5627778	Genebody	intron (NM_001320571, intron 2 of 18)	4615	NM_001320572	6294	Hs.728802	NM_002967	ENSG00000160633	SAFB	HAP|HET|SAB-B1|SAF-B|SAF-B1|SAFB1	scaffold attachment factor B	protein-coding	12.35
chr3-123	chr3	190072924	190073193	Genebody	intron (NM_001134418, intron 1 of 14)	-47906	NR_126419	101929152		NR_126419	ENSG00000225764	P3H2-AS1	LEPREL1-AS1	P3H2 antisense RNA 1	ncRNA	12.34
chr17-112	chr17	42112679	42112948	Promoter	promoter-TSS (NM_024119)	-80	NM_024119	79132	Hs.55918	NM_024119	ENSG00000108771	DHX58	D11LGP2|D11lgp2e|LGP2|RLR-3	DExH-box helicase 58	protein-coding	12.34
chr3-103	chr3	44861707	44861964	Promoter	promoter-TSS (NM_144638)	-53	NR_030290	693149		NR_030290	ENSG00000284498	MIR564	MIRN564|hsa-mir-564	microRNA 564	ncRNA	12.33
chr14-61	chr14	33676160	33676397	Genebody	exon (NM_022123, exon 5 of 11)	-32659	NR_132771	106635522		NR_132771		SNORA89	-	small nucleolar RNA, H/ACA box 89	snoRNA	12.33
chr1-247	chr1	19882213	19882482	Promoter	promoter-TSS (NM_015207)	-48	NM_015207	23252	Hs.374987	NM_015207	ENSG00000169914	OTUD3	DUBA4	OTU deubiquitinase 3	protein-coding	12.32
chr2-270	chr2	215681344	215681593	Genebody	intron (NR_037195, intron 5 of 9)	-36575	NR_132383	105373869	Hs.152812	NR_132383		LINC01614	LCAL4	long intergenic non-protein coding RNA 1614	ncRNA	12.32
chr19-128	chr19	8269344	8269597	Intergenic	LTR13|LTR|ERVK	38886	NM_001165895	51293	Hs.558499	NM_016579	ENSG00000167775	CD320	8D6|8D6A|TCBLR	CD320 molecule	protein-coding	12.32
chr5-97	chr5	172174767	172175023	Genebody	intron (NM_005990, intron 1 of 18)	13447	NM_005990	6793	Hs.744005	NM_005990	ENSG00000072786	STK10	LOK|PRO2729	serine/threonine kinase 10	protein-coding	12.32
chr11-88	chr11	95715915	95716143	Intergenic	Intergenic	73761	NM_144664	143684	Hs.288304	NM_144664	ENSG00000077458	FAM76B	-	family with sequence similarity 76 member B	protein-coding	12.31
chr1-174	chr1	156748971	156749240	Genebody	intron (NM_001126050, intron 1 of 5)	2188	NM_001319187	3068	Hs.743948	NM_004494	ENSG00000143321	HDGF	HMG1L2	heparin binding growth factor	protein-coding	12.29
chr8-43	chr8	141239014	141239283	Genebody	intron (NM_001286646, intron 1 of 7)	-10574	NM_001286648	57210	Hs.372492	NM_001080431	ENSG00000022567	SLC45A4	-	solute carrier family 45 member 4	protein-coding	12.29
chr4-78	chr4	83221609	83221869	Intergenic	MLT1F2|LTR|ERVL-MaLR	63056	NM_001358921	27235	Hs.144304	NM_015697	ENSG00000173085	COQ2	CL640|COQ10D1|MSA1|PHB:PPT	coenzyme Q2, polyprenyltransferase	protein-coding	12.27
chr21-62	chr21	5106676	5106945	Intergenic	Intergenic	4750	NR_146631	105377138		NR_146631		LINC01678	-	long intergenic non-protein coding RNA 1678	ncRNA	12.24
chr17-85	chr17	77320939	77321183	Promoter	intron (NM_006640, intron 1 of 10)	1546	NM_006640	10801	Hs.440932	NM_006640	ENSG00000184640	SEPT9	AF17q25|MSF|MSF1|NAPB|PNUTL4|SINT1|SeptD1	septin 9	protein-coding	12.22
chr12-82	chr12	110079476	110079730	Intergenic	MLT1O|LTR|ERVL-MaLR	-5964	NR_148514	400073	Hs.44817	NM_207435	ENSG00000174456	C12orf76	-	chromosome 12 open reading frame 76	protein-coding	12.22
chr2-119	chr2	68427375	68427644	Intergenic	Intergenic	39808	NM_001024680	554251	Hs.164117	NM_001024680	ENSG00000204923	FBXO48	-	F-box protein 48	protein-coding	12.21
chr2-128	chr2	11750440	11750709	Genebody	intron (NM_001349205, intron 1 of 21)	2041	NM_001349205	23175	Hs.467740	NM_145693	ENSG00000134324	LPIN1	PAP1	lipin 1	protein-coding	12.21
chr20-45	chr20	16729829	16730098	Promoter	promoter-TSS (NM_003092)	-1	NM_003092	6629	Hs.280378	NM_003092	ENSG00000125870	SNRPB2	Msl1|U2B''	small nuclear ribonucleoprotein polypeptide B2	protein-coding	12.18
chr16-110	chr16	2507032	2507290	Intergenic	Intergenic	-6565	NM_001198569	527	Hs.389107	NM_001694	ENSG00000185883	ATP6V0C	ATP6C|ATP6L|ATPL|VATL|VPPC|Vma3	ATPase H+ transporting V0 subunit c	protein-coding	12.17
chr6-77	chr6	111767872	111768141	Genebody	intron (NM_002037, intron 3 of 13)	-8875	NM_153048	2534	Hs.390567	NM_002037	ENSG00000010810	FYN	SLK|SYN|p59-FYN	FYN proto-oncogene, Src family tyrosine kinase	protein-coding	12.16
chr2-92	chr2	202269666	202269935	Genebody	intron (NM_015934, intron 1 of 14)	4084	NM_015934	51602	Hs.471104	NM_015934	ENSG00000055044	NOP58	HSPC120|NOP5|NOP5/NOP58	NOP58 ribonucleoprotein	protein-coding	12.16
chr3-95	chr3	191337007	191337266	Genebody	Cheshire|DNA|hAT-Charlie	-6600	NM_198152	257313	Hs.518492	NM_198152	ENSG00000188958	UTS2B	U2B|URP|UTS2D	urotensin 2B	protein-coding	12.15
chr9-68	chr9	128128169	128128427	Promoter	promoter-TSS (NM_001256335)	-110	NM_001256335	80142	Hs.495219	NM_025072	ENSG00000148334	PTGES2	C9orf15|GBF-1|GBF1|PGES2|mPGES-2	prostaglandin E synthase 2	protein-coding	12.14
chr13-57	chr13	52498110	52498379	Genebody	L1MA4A|LINE|L1	9251	NR_002793	220115	Hs.528448	NR_002793		TPTE2P3	TPTEps1	transmembrane phosphoinositide 3-phosphatase and tensin homolog 2 pseudogene 3	pseudo	12.13
chr16-213	chr16	67940164	67940407	Genebody	exon (NM_000229, exon 6 of 6)	-3408	NM_002801	5699	Hs.9661	NM_002801	ENSG00000205220	PSMB10	LMP10|MECL1|beta2i	proteasome subunit beta 10	protein-coding	12.12
chr17-184	chr17	76481199	76481464	Genebody	intron (NM_024599, intron 3 of 18)	6578	NM_001005498	79651	Hs.464157	NM_024599	ENSG00000129667	RHBDF2	RHBDL5|RHBDL6|TEC|TOC|TOCG|iRhom2	rhomboid 5 homolog 2	protein-coding	12.12
chr17-168	chr17	28371223	28371490	Promoter	promoter-TSS (NM_015077)	-306	NM_015077	23098	Hs.743510	NM_015077	ENSG00000004139	SARM1	MyD88-5|SAMD2|SARM	sterile alpha and TIR motif containing 1	protein-coding	12.11
chr4-57	chr4	165112287	165112556	Promoter	CpG	451	NM_001100389	201931	Hs.704511	NM_152681	ENSG00000170088	TMEM192	-	transmembrane protein 192	protein-coding	12.1
chr4-72	chr4	48196725	48196971	Genebody	intron (NM_003215, intron 2 of 17)	-62592	NM_003328	7294	Hs.479669	NM_003328	ENSG00000074966	TXK	BTKL|PSCTK5|PTK4|RLK|TKL	TXK tyrosine kinase	protein-coding	12.09
chr11-81	chr11	61963422	61963684	Genebody	TTS (NM_002032)	4107	NM_002032	2495	Hs.524910	NM_002032	ENSG00000167996	FTH1	FHC|FTH|FTHL6|HFE5|PIG15|PLIF	ferritin heavy chain 1	protein-coding	12.09
chr7-77	chr7	6250290	6250552	Genebody	intron (NM_004227, intron 1 of 12)	22190	NM_004227	9265	Hs.487479	NM_004227	ENSG00000008256	CYTH3	ARNO3|GRP1|PSCD3|cytohesin-3	cytohesin 3	protein-coding	12.09
chr21-67	chr21	5547394	5547657	Intergenic	Intergenic	-6112	NM_001322047	102724843	Hs.743984	NM_001322047		LOC102724843	-	uncharacterized LOC102724843	protein-coding	12.08
chr7-76	chr7	112084475	112084744	Genebody	intron (NM_014705, intron 1 of 51)	121798	NM_014705	9732	Hs.654652	NM_014705	ENSG00000128512	DOCK4	-	dedicator of cytokinesis 4	protein-coding	12.07
chr17-166	chr17	40543121	40543390	Intergenic	Intergenic	17139	NM_001301718	1236	Hs.370036	NM_001838	ENSG00000126353	CCR7	BLR2|CC-CKR-7|CCR-7|CD197|CDw197|CMKBR7|EBI1	C-C motif chemokine receptor 7	protein-coding	12.07
chr16-144	chr16	30123315	30123584	Promoter	promoter-TSS (NM_001040056)	-140	NM_002746	5595	Hs.861	NM_002746	ENSG00000102882	MAPK3	ERK-1|ERK1|ERT2|HS44KDAP|HUMKER1A|P44ERK1|P44MAPK|PRKM3|p44-ERK1|p44-MAPK	mitogen-activated protein kinase 3	protein-coding	12.07
chr6-60	chr6	33027817	33028086	Intergenic	Intergenic	-18339	NM_002119	3111	Hs.631991	NM_002119	ENSG00000204252	HLA-DOA	HLA-DNA|HLA-DZA|HLADZ	major histocompatibility complex, class II, DO alpha	protein-coding	12.07
chr14-62	chr14	22815796	22816065	Promoter	promoter-TSS (NR_040448)	-32	NM_001126105	9056	Hs.513147	NM_003982	ENSG00000155465	SLC7A7	LAT3|LPI|MOP-2|Y+LAT1|y+LAT-1	solute carrier family 7 member 7	protein-coding	12.05
chr3-80	chr3	59451359	59451628	Intergenic	Intergenic	207004	NR_149028	339902	Hs.132446	NR_149028		LOC339902	-	hCG1813818	ncRNA	12.05
chr8-84	chr8	29409754	29410023	Intergenic	MLT1I|LTR|ERVL-MaLR	-59138	NM_001394	1846	Hs.417962	NM_001394	ENSG00000120875	DUSP4	HVH2|MKP-2|MKP2|TYP	dual specificity phosphatase 4	protein-coding	12.05
chr17-211	chr17	44159539	44159802	Genebody	LTR13A|LTR|ERVK	-11036	NM_080863	92591	Hs.534517	NM_080863	ENSG00000161664	ASB16	-	ankyrin repeat and SOCS box containing 16	protein-coding	12.05
chr1-224	chr1	192559641	192559868	Intergenic	Tigger1|DNA|TcMar-Tigger	-15973	NM_002922	5996	Hs.75256	NM_002922	ENSG00000090104	RGS1	1R20|BL34|HEL-S-87|IER1|IR20	regulator of G protein signaling 1	protein-coding	12.05
chr5-59	chr5	55338901	55339166	Genebody	AluSx|SINE|Alu	31285	NM_015360	23517	Hs.274531	NM_015360	ENSG00000039123	MTREX	Dob1|KIAA0052|Mtr4|SKIV2L2|fSAP118	Mtr4 exosome RNA helicase	protein-coding	12.04
chr17-106	chr17	79697270	79697538	Intergenic	Intergenic	9845	NR_039893	100616170		NR_039893	ENSG00000266665	MIR4739	mir-4739	microRNA 4739	ncRNA	12.04
chr4-93	chr4	94484866	94485126	Genebody	intron (NM_001256428, intron 2 of 11)	33139	NM_001256427	10611	Hs.480311	NM_006457	ENSG00000163110	PDLIM5	ENH|ENH1|L9|LIM	PDZ and LIM domain 5	protein-coding	12.02
chr3-83	chr3	172107004	172107266	Genebody	intron (NM_001135095, intron 1 of 25)	66581	NM_001135095	64778	Hs.744888	NM_022763	ENSG00000075420	FNDC3B	FAD104|PRO4979|YVTM2421	fibronectin type III domain containing 3B	protein-coding	12.01
chr11-206	chr11	34405133	34405400	Intergenic	MIRb|SINE|MIR	-33659	NM_001752	847	Hs.502302	NM_001752	ENSG00000121691	CAT	-	catalase	protein-coding	12
chr19-171	chr19	4180184	4180453	Promoter	MLT1J|LTR|ERVL-MaLR	1988	NM_001321064	51548	Hs.423756	NM_016539	ENSG00000077463	SIRT6	SIR2L6	sirtuin 6	protein-coding	11.99
chr1-373	chr1	22048657	22048926	Intergenic	MLT1K|LTR|ERVL-MaLR	-3836	NM_044472	998	Hs.467637	NM_001791	ENSG00000070831	CDC42	CDC42Hs|G25K|TKS	cell division cycle 42	protein-coding	11.99
chr1-259	chr1	52056136	52056392	Promoter	promoter-TSS (NM_001136497)	79	NM_001136497	91408	Hs.429839	NM_152265	ENSG00000134717	BTF3L4	-	basic transcription factor 3 like 4	protein-coding	11.98
chr10-111	chr10	104268988	104269243	Promoter	promoter-TSS (NR_039702)	242	NM_001191013	119391	Hs.107384	NM_183239	ENSG00000065621	GSTO2	GSTO 2-2|bA127L20.1	glutathione S-transferase omega 2	protein-coding	11.97
chr12-109	chr12	54260126	54260393	Promoter	promoter-TSS (NM_001127322)	-673	NM_001127321	23468	Hs.349283	NM_012117	ENSG00000094916	CBX5	HEL25|HP1|HP1A	chromobox 5	protein-coding	11.95
chr7-74	chr7	96322117	96322375	Promoter	promoter-TSS (NM_001160210)	-99	NM_001160210	10165	Hs.489190	NM_014251	ENSG00000004864	SLC25A13	ARALAR2|CITRIN|CTLN2	solute carrier family 25 member 13	protein-coding	11.95
chr12-85	chr12	68746011	68746280	Promoter	promoter-TSS (NM_001354998)	59	NM_001354998	55508	Hs.506011	NM_018656	ENSG00000175782	SLC35E3	BLOV1	solute carrier family 35 member E3	protein-coding	11.94
chr2-99	chr2	196211289	196211558	Genebody	intron (NM_001348768, intron 28 of 28)	-39811	NM_004226	9262	Hs.88297	NM_004226	ENSG00000081320	STK17B	DRAK2	serine/threonine kinase 17b	protein-coding	11.94
chr16-119	chr16	649139	649408	Promoter	promoter-TSS (NR_135177)	40	NR_135177	105371038		NR_135177		LOC105371038	-	uncharacterized LOC105371038	ncRNA	11.94
chr19-133	chr19	572218	572487	Promoter	promoter-TSS (NM_001728)	-102	NM_198589	682	Hs.501293	NM_001728	ENSG00000172270	BSG	5F7|CD147|EMMPRIN|EMPRIN|OK|TCSF	basigin (Ok blood group)	protein-coding	11.94
chr17-143	chr17	42248686	42248948	Genebody	intron (NM_012448, intron 1 of 18)	27589	NM_012448	6777	Hs.595276	NM_012448	ENSG00000173757	STAT5B	STAT5	signal transducer and activator of transcription 5B	protein-coding	11.93
chr18-30	chr18	77128384	77128637	Genebody	L1MD2|LINE|L1	4308	NM_001025101	4155	Hs.551713	NM_002385	ENSG00000197971	MBP	-	myelin basic protein	protein-coding	11.93
chrX-34	chrX	48937097	48937347	Genebody	intron (NM_017602, intron 2 of 8)	-18086	NM_006875	11040	Hs.727148	NM_006875	ENSG00000102096	PIM2	-	Pim-2 proto-oncogene, serine/threonine kinase	protein-coding	11.92
chr1-252	chr1	235128897	235129166	Promoter	promoter-TSS (NM_014765)	-90	NM_014765	9804	Hs.533192	NM_014765	ENSG00000173726	TOMM20	MAS20|MOM19|TOM20	translocase of outer mitochondrial membrane 20	protein-coding	11.91
chr1-219	chr1	111449132	111449401	Promoter	promoter-TSS (NM_001317064)	42	NM_024102	79084	Hs.204773	NM_024102	ENSG00000116455	WDR77	HKMT1069|MEP-50|MEP50|Nbla10071|p44|p44/Mep50	WD repeat domain 77	protein-coding	11.91
chr7-85	chr7	94170855	94171119	Intergenic	Tigger13a|DNA|TcMar-Tigger	-166605	NR_133909	10282	Hs.489132	NM_005868	ENSG00000105829	BET1	HBET1	Bet1 golgi vesicular membrane trafficking protein	protein-coding	11.89
chr11-62	chr11	9384368	9384634	Promoter	promoter-TSS (NM_006391)	-121	NM_006391	10527	Hs.744911	NM_006391	ENSG00000205339	IPO7	Imp7|RANBP7	importin 7	protein-coding	11.89
chr1-442	chr1	235907909	235908178	Intergenic	MIR|SINE|MIR	-24335	NR_102436	1130	Hs.532411	NM_000081	ENSG00000143669	LYST	CHS|CHS1	lysosomal trafficking regulator	protein-coding	11.89
chr7-50	chr7	121385835	121386088	Genebody	intron (NM_001040020, intron 1 of 9)	10407	NM_001040020	10447	Hs.434053	NM_014888	ENSG00000196937	FAM3C	GS3786|ILEI	family with sequence similarity 3 member C	protein-coding	11.87
chr11-68	chr11	20387367	20387631	Promoter	promoter-TSS (NM_001145166)	-31	NM_001145167	10196	Hs.152337	NM_005788	ENSG00000185238	PRMT3	HRMT1L3	protein arginine methyltransferase 3	protein-coding	11.87
chr6-114	chr6	53335174	53335433	Genebody	non-coding (NR_046241, exon 1 of 1)	2314	NR_046241	647190	Hs.520189	NR_046241		RPS16P5	RPS16_3_702	ribosomal protein S16 pseudogene 5	pseudo	11.87
chr12-75	chr12	128820876	128821106	Genebody	MSTB1|LTR|ERVL-MaLR	3005	NM_145648	121260	Hs.507260	NM_145648	ENSG00000139370	SLC15A4	FP12591|PHT1|PTR4	solute carrier family 15 member 4	protein-coding	11.86
chr14-69	chr14	24705916	24706146	Intergenic	Intergenic	-71762	NM_001346011	3002	Hs.1051	NM_004131	ENSG00000100453	GZMB	C11|CCPI|CGL-1|CGL1|CSP-B|CSPB|CTLA1|CTSGL1|HLP|SECT	granzyme B	protein-coding	11.86
chr3-87	chr3	33089472	33089729	Genebody	TTS (NM_001136238)	7201	NM_001136238	643853	Hs.443031	NM_001039770	ENSG00000188167	TMPPE	-	transmembrane protein with metallophosphoesterase domain	protein-coding	11.85
chr17-122	chr17	75459926	75460193	Genebody	intron (NM_001321149, intron 1 of 31)	3595	NM_014738	9772	Hs.514474	NM_014738	ENSG00000177728	TMEM94	KIAA0195	transmembrane protein 94	protein-coding	11.84
chr20-40	chr20	4973678	4973943	Genebody	intron (NM_203327, intron 1 of 16)	27689	NM_005116	9962	Hs.516866	NM_005116	ENSG00000089057	SLC23A2	NBTL1|SLC23A1|SVCT2|YSPL2	solute carrier family 23 member 2	protein-coding	11.82
chr8-44	chr8	100463760	100464029	Intergenic	Intergenic	81131	NR_039681	100616451		NR_039681	ENSG00000265599	MIR4471	-	microRNA 4471	ncRNA	11.81
chr2-113	chr2	86440562	86440820	Promoter	promoter-TSS (NM_018433)	-457	NM_018433	55818	Hs.557425	NM_018433	ENSG00000115548	KDM3A	JHDM2A|JHMD2A|JMJD1|JMJD1A|TSGA	lysine demethylase 3A	protein-coding	11.81
chrX-29	chrX	120559891	120560160	Promoter	intron (NM_001079872, intron 1 of 19)	937	NM_001079872	8450	Hs.102914	NM_003588	ENSG00000158290	CUL4B	CUL-4B|MRXHF2|MRXS15|MRXSC|SFM2	cullin 4B	protein-coding	11.81
chr17-113	chr17	39980604	39980873	Promoter	promoter-TSS (NM_002809)	-30	NM_002809	5709	Hs.12970	NM_002809	ENSG00000108344	PSMD3	P58|RPN3|S3|TSTA2	proteasome 26S subunit, non-ATPase 3	protein-coding	11.78
chr17-107	chr17	46191620	46191870	Promoter	intron (NM_001193465, intron 2 of 15).3	1055	NM_001193466	284058	Hs.648744	NM_015443	ENSG00000120071	KANSL1	CENP-36|KDVS|KIAA1267|MSL1v1|NSL1|hMSL1v1	KAT8 regulatory NSL complex subunit 1	protein-coding	11.78
chr16-169	chr16	84613766	84614034	Genebody	MLT1K|LTR|ERVL-MaLR	4196	NM_021149	23406	Hs.289092	NM_021149	ENSG00000103187	COTL1	CLP	coactosin like F-actin binding protein 1	protein-coding	11.77
chr12-107	chr12	49201246	49201515	Intergenic	Intergenic	-12056	NM_001270400	7846	Hs.654422	NM_006009	ENSG00000167552	TUBA1A	B-ALPHA-1|LIS3|TUBA3	tubulin alpha 1a	protein-coding	11.75
chr19-116	chr19	18571588	18571845	Promoter	promoter-TSS (NM_001321017)	-14	NM_001321017	7311	Hs.5308	NM_003333	ENSG00000221983	UBA52	CEP52|HUBCEP52|L40|RPL40	ubiquitin A-52 residue ribosomal protein fusion product 1	protein-coding	11.74
chr12-83	chr12	118357329	118357598	Genebody	intron (NM_001346493, intron 1 of 22)	2257	NM_001346489	51347	Hs.644420	NM_016281	ENSG00000135090	TAOK3	DPK|JIK|MAP3K18|hKFC-A	TAO kinase 3	protein-coding	11.73
chr1-228	chr1	225444902	225445171	Intergenic	Intergenic	-16181	NM_194442	3930	Hs.435166	NM_002296	ENSG00000143815	LBR	DHCR14B|LMN2R|PHA|TDRD18	lamin B receptor	protein-coding	11.73
chr1-239	chr1	235015736	235015970	Intergenic	HAL1M8|LINE|L1	-51854	NR_125945	101927851	Hs.520684	NR_125945	ENSG00000238005	LOC101927851	-	uncharacterized LOC101927851	ncRNA	11.72
chr18-31	chr18	79523817	79524077	Genebody	intron (NM_001278673, intron 8 of 8)	-55335	NR_148949	284240	Hs.448912	NR_148949		LOC284240	-	uncharacterized LOC284240	ncRNA	11.72
chr21-96	chr21	5601931	5602157	Intergenic	Intergenic	32840	NM_001322975	102723360	Hs.743984	NM_001322975		LOC102723360	-	uncharacterized LOC102723360	protein-coding	11.72
chr7-63	chr7	5235221	5235483	Intergenic	Intergenic	21083	NM_001033520	26100	Hs.122363	NM_015610	ENSG00000157954	WIPI2	ATG18B|Atg21|CGI-50|WIPI-2	WD repeat domain, phosphoinositide interacting 2	protein-coding	11.71
chr14-71	chr14	55411729	55411991	Promoter	promoter-TSS (NM_014924)	-2	NM_014924	22863	Hs.414809	NM_014924	ENSG00000126775	ATG14	ATG14L|BARKOR|KIAA0831	autophagy related 14	protein-coding	11.71
chr5-103	chr5	132422700	132422969	Genebody	intron (NM_001207001, intron 2 of 3)	12061	NM_001207001	441108	Hs.658288	NM_001013717		C5orf56	-	chromosome 5 open reading frame 56	protein-coding	11.7
chr11-47	chr11	62622134	62622403	Promoter	promoter-TSS (NR_109991)	-93	NM_012200	26229	Hs.502759	NM_012200	ENSG00000149541	B3GAT3	GLCATI|JDSCD|glcUAT-I	beta-1,3-glucuronyltransferase 3	protein-coding	11.7
chr1-184	chr1	62621989	62622258	Genebody	MLT1H|LTR|ERVL-MaLR	24636	NM_014495	27329	Hs.209153	NM_014495	ENSG00000132855	ANGPTL3	ANG-5|ANGPT5|ANL3|FHBL2	angiopoietin like 3	protein-coding	11.7
chr4-104	chr4	38730748	38731008	Intergenic	Intergenic	52112	NM_001017388	81793	Hs.120551	NM_030956	ENSG00000174123	TLR10	CD290	toll like receptor 10	protein-coding	11.69
chr6-134	chr6	63685513	63685752	Genebody	exon (NM_001290259, exon 5 of 17)	39106	NM_015153	23469	Hs.348921	NM_015153	ENSG00000118482	PHF3	-	PHD finger protein 3	protein-coding	11.69
chr2-175	chr2	237557242	237557489	Intergenic	Intergenic	-9209	NM_015893	51052	Hs.247710	NM_015893	ENSG00000071677	PRLH	PRH|PRRP	prolactin releasing hormone	protein-coding	11.69
chr1-287	chr1	41003697	41003948	Genebody	MLT1H2|LTR|ERVL-MaLR	-10768	NR_037868	100507178	Hs.660056	NR_037868	ENSG00000281207	SLFNL1-AS1	-	SLFNL1 antisense RNA 1	ncRNA	11.68
chr9-56	chr9	33297534	33297780	Genebody	MLT1E|LTR|ERVL-MaLR	7240	NM_001318758	4799	Hs.413074	NM_002504	ENSG00000086102	NFX1	NFX2|TEG-42|Tex42	nuclear transcription factor, X-box binding 1	protein-coding	11.68
chr2-94	chr2	159516575	159516844	Genebody	intron (NM_013450, intron 2 of 36)	-98585	NR_110587	643072	Hs.632541	NR_110587		LOC643072	-	uncharacterized LOC643072	ncRNA	11.67
chr2-111	chr2	233063428	233063697	Genebody	intron (NM_001017915, intron 1 of 26)	3595	NM_001017915	3635	Hs.262886	NM_005541	ENSG00000168918	INPP5D	SHIP|SHIP-1|SHIP1|SIP-145|hp51CN|p150Ship	inositol polyphosphate-5-phosphatase D	protein-coding	11.67
chr10-91	chr10	119784772	119785041	Genebody	L1MB8|LINE|L1	-34351	NM_001243194	22876	Hs.369755	NM_014937	ENSG00000198825	INPP5F	MSTP007|MSTPO47|SAC2|hSAC2	inositol polyphosphate-5-phosphatase F	protein-coding	11.67
chr2-101	chr2	68366353	68366611	Promoter	intron (NM_002664, intron 1 of 8)	1292	NM_002664	5341	Hs.468840	NM_002664	ENSG00000115956	PLEK	P47	pleckstrin	protein-coding	11.67
chr2-90	chr2	130370570	130370833	Genebody	intron (NM_001142370, intron 5 of 10)	14694	NM_014369	26469	Hs.516390	NM_014369	ENSG00000072135	PTPN18	BDP1|PTP-HSCF	protein tyrosine phosphatase, non-receptor type 18	protein-coding	11.66
chr19-125	chr19	4638953	4639208	Promoter	promoter-TSS (NM_001167942)	-435	NM_152362	126282	Hs.465643	NM_152362	ENSG00000185361	TNFAIP8L1	TIPE1	TNF alpha induced protein 8 like 1	protein-coding	11.66
chr2-195	chr2	108652581	108652850	Genebody	L1MD2|LINE|L1	-2097	NM_001193485	3987	Hs.597715	NM_004987	ENSG00000169756	LIMS1	PINCH|PINCH-1|PINCH1	LIM zinc finger domain containing 1	protein-coding	11.65
chr3-63	chr3	129399425	129399694	Promoter	promoter-TSS (NR_003111)	-120	NR_003111	132241	Hs.477537	NR_003111	ENSG00000251474	RPL32P3	-	ribosomal protein L32 pseudogene 3	pseudo	11.65
chr12-80	chr12	25293633	25293900	Intergenic	Intergenic	-42835	NM_004985	3845	Hs.505033	NM_004985	ENSG00000133703	KRAS	C-K-RAS|CFC2|K-RAS2A|K-RAS2B|K-RAS4A|K-RAS4B|K-Ras|KI-RAS|KRAS1|KRAS2|NS|NS3|RALD|RASK2|c-Ki-ras2	KRAS proto-oncogene, GTPase	protein-coding	11.65
chr10-127	chr10	3828871	3829140	Intergenic	Intergenic	-4945	NR_134490	105376365	Hs.460114	NR_134490	ENSG00000230573	LOC105376365	-	uncharacterized LOC105376365	ncRNA	11.65
chr17-147	chr17	64506579	64506834	Promoter	promoter-TSS (NM_138363)	25	NM_001320596	1655	Hs.279806	NM_004396	ENSG00000108654	DDX5	G17P1|HLR1|HUMP68|p68	DEAD-box helicase 5	protein-coding	11.63
chr1-192	chr1	202348418	202348680	Promoter	promoter-TSS (NM_001331029)	-153	NM_001167858	4660	Hs.444403	NM_002481	ENSG00000077157	PPP1R12B	MYPT2|PP1bp55	protein phosphatase 1 regulatory subunit 12B	protein-coding	11.63
chr8-56	chr8	89983970	89984232	Promoter	intron (NM_001024688, intron 1 of 16)	570	NM_002485	4683	Hs.492208	NM_002485	ENSG00000104320	NBN	AT-V1|AT-V2|ATV|NBS|NBS1|P95	nibrin	protein-coding	11.63
chr10-103	chr10	96271486	96271745	Promoter	promoter-TSS (NR_047680)	-39	NM_013314	29760	Hs.665244	NM_013314	ENSG00000095585	BLNK	AGM4|BASH|BLNK-S|LY57|SLP-65|SLP65|bca	B cell linker	protein-coding	11.62
chrX-37	chrX	150568318	150568587	Promoter	promoter-TSS (NM_000252)	-145	NM_000252	4534	Hs.655056	NM_000252	ENSG00000171100	MTM1	CNM|MTMX|XLMTM	myotubularin 1	protein-coding	11.62
chr4-61	chr4	138190476	138190745	Genebody	intron (NM_014331, intron 6 of 11)	51739	NM_014331	23657	Hs.390594	NM_014331	ENSG00000151012	SLC7A11	CCBR1|xCT	solute carrier family 7 member 11	protein-coding	11.62
chr3-77	chr3	30640086	30640326	Genebody	intron (NM_001024847, intron 2 of 7)	33704	NM_003242	7048	Hs.82028	NM_003242	ENSG00000163513	TGFBR2	AAT3|FAA3|LDS1B|LDS2|LDS2B|MFS2|RIIC|TAAD2|TBR-ii|TBRII|TGFR-2|TGFbeta-RII	transforming growth factor beta receptor 2	protein-coding	11.61
chr11-61	chr11	128628165	128628413	Intergenic	Intergenic	-40731	NM_001143820	2113	Hs.369438	NM_005238	ENSG00000134954	ETS1	ETS-1|EWSR2|c-ets-1|p54	ETS proto-oncogene 1, transcription factor	protein-coding	11.61
chr5-93	chr5	160459236	160459482	Intergenic	Intergenic	-8892	NR_132748	107075116	Hs.735831	NR_132748	ENSG00000253522	MIR3142HG	-	MIR3142 host gene	ncRNA	11.59
chr4-90	chr4	112817941	112818195	Promoter	promoter-TSS (NM_001354249)	71	NM_001354277	287	Hs.620557	NM_001148	ENSG00000145362	ANK2	ANK-2|LQT4|brank-2	ankyrin 2	protein-coding	11.59
chrX-30	chrX	13742810	13743074	Genebody	L1MC3|LINE|L1	8229	NM_003611	8481	Hs.6483	NM_003611	ENSG00000046651	OFD1	71-7A|CXorf5|JBTS10|RP23|SGBS2	OFD1, centriole and centriolar satellite protein	protein-coding	11.59
chr9-69	chr9	130579336	130579605	Promoter	promoter-TSS (NM_003934)	24	NR_027440	100272217	Hs.601255	NR_027440		LOC100272217	-	uncharacterized LOC100272217	ncRNA	11.59
chr2-118	chr2	54574521	54574771	Genebody	intron (NM_178313, intron 1 of 30)	16252	NM_178313	6711	Hs.503178	NM_003128	ENSG00000115306	SPTBN1	ELF|HEL102|SPTB2|betaSpII	spectrin beta, non-erythrocytic 1	protein-coding	11.58
chr17-167	chr17	77958454	77958717	Intergenic	CpG	-45652	NM_018996	57690	Hs.406810	NM_018996	ENSG00000078687	TNRC6C	-	trinucleotide repeat containing 6C	protein-coding	11.58
chr11-70	chr11	73788595	73788850	Promoter	AluSg|SINE|Alu	850	NR_134661	51642	Hs.503239	NM_016055	ENSG00000175581	MRPL48	CGI-118|HSPC290|L48MT|MRP-L48	mitochondrial ribosomal protein L48	protein-coding	11.58
chr10-139	chr10	3758151	3758419	Intergenic	Intergenic	26996	NR_027653	1316	Hs.4055	NM_001300	ENSG00000067082	KLF6	BCD1|CBA1|COPEB|CPBP|GBF|PAC1|ST12|ZF9	Kruppel like factor 6	protein-coding	11.58
chr1-201	chr1	155609650	155609906	Promoter	promoter-TSS (NR_024117)	-392	NM_001350772	55154	Hs.656547	NM_018116	ENSG00000125459	MSTO1	LST005|MMYAT|MST	misato 1, mitochondrial distribution and morphology regulator	protein-coding	11.56
chr3-84	chr3	31532047	31532298	Promoter	promoter-TSS (NM_178862)	-329	NM_178862	201595	Hs.475812	NM_178862	ENSG00000163527	STT3B	CDG1X|SIMP|STT3-B	STT3B, catalytic subunit of the oligosaccharyltransferase complex	protein-coding	11.56
chr18-23	chr18	54264018	54264283	Intergenic	Intergenic	-5329	NM_001351613	11201	Hs.438533	NM_007195	ENSG00000101751	POLI	RAD30B|RAD3OB|eta2	DNA polymerase iota	protein-coding	11.55
chr7-61	chr7	103347916	103348179	Promoter	intron (NM_001204453, intron 1 of 4)	523	NM_001204453	5701	Hs.437366	NM_002803	ENSG00000161057	PSMC2	MSS1|Nbla10058|S7	proteasome 26S subunit, ATPase 2	protein-coding	11.55
chr5-76	chr5	89232242	89232511	Genebody	intron (NR_136219, intron 7 of 9)	-328271	NM_001131005	4208	Hs.649965	NM_002397	ENSG00000081189	MEF2C	C5DELq14.3|DEL5q14.3	myocyte enhancer factor 2C	protein-coding	11.54
chr17-133	chr17	42535999	42536255	Promoter	5' UTR (NM_000263, exon 1 of 6)	194	NM_000263	4669	Hs.50727	NM_000263	ENSG00000108784	NAGLU	CMT2V|MPS-IIIB|MPS3B|NAG|UFHSD	N-acetyl-alpha-glucosaminidase	protein-coding	11.53
chr14-92	chr14	92846509	92846769	Intergenic	MLT1I|LTR|ERVL-MaLR	52408	NM_005113	9950	Hs.104320	NM_005113	ENSG00000066455	GOLGA5	GOLIM5|RFG5|ret-II	golgin A5	protein-coding	11.52
chr8-81	chr8	101790908	101791174	Promoter	5' UTR (NM_032041, exon 1 of 4)	170	NM_032041	83988	Hs.492427	NM_032041	ENSG00000104490	NCALD	-	neurocalcin delta	protein-coding	11.51
chr5-104	chr5	14287063	14287332	Genebody	intron (NR_134469, intron 4 of 56)	143495	NM_007118	7204	Hs.130031	NM_007118	ENSG00000038382	TRIO	ARHGEF23|MEBAS|MRD44|tgat	trio Rho guanine nucleotide exchange factor	protein-coding	11.51
chr18-27	chr18	59923172	59923440	Intergenic	Intergenic	23346	NM_021127	5366	Hs.96	NM_021127	ENSG00000141682	PMAIP1	APR|NOXA	phorbol-12-myristate-13-acetate-induced protein 1	protein-coding	11.5
chrX-39	chrX	135520462	135520723	Promoter	promoter-TSS (NM_001351606)	-34	NM_182540	203522	Hs.496829	NM_182540	ENSG00000165359	INTS6L	DDX26B	integrator complex subunit 6 like	protein-coding	11.5
chr20-42	chr20	49750658	49750927	Intergenic	MLT1K|LTR|ERVL-MaLR	-36908	NM_004776	9334	Hs.370487	NM_004776	ENSG00000158470	B4GALT5	B4Gal-T5|BETA4-GALT-IV|beta4Gal-T5|beta4GalT-V|gt-V	beta-1,4-galactosyltransferase 5	protein-coding	11.48
chr22-46	chr22	39080349	39080618	Genebody	MSTD|LTR|ERVL-MaLR	3478	NM_021822	60489	Hs.660143	NM_021822	ENSG00000239713	APOBEC3G	A3G|ARCD|ARP-9|ARP9|CEM-15|CEM15|MDS019|bK150C2.7|dJ494G10.1	apolipoprotein B mRNA editing enzyme catalytic subunit 3G	protein-coding	11.48
chr9-84	chr9	41502655	41502924	Intergenic	Intergenic	143927	NR_148348	107984035	Hs.649184	NR_148348		LOC107984035	-	uncharacterized LOC107984035	ncRNA	11.48
chr21-106	chr21	44155003	44155262	Intergenic	Intergenic	4730	NR_146631	105377138		NR_146631		LINC01678	-	long intergenic non-protein coding RNA 1678	ncRNA	11.48
chr19-130	chr19	10239193	10239458	Intergenic	AluJo|SINE|Alu	-8053	NM_004230	9294	Hs.655405	NM_004230	ENSG00000267534	S1PR2	AGR16|DFNB68|EDG-5|EDG5|Gpcr13|H218|LPB2|S1P2	sphingosine-1-phosphate receptor 2	protein-coding	11.47
chr10-261	chr10	33783228	33783486	Intergenic	LTR45B|LTR|ERV1	-10677	NR_038932	100505583	Hs.568804	NR_038932	ENSG00000261683	LINC00838	-	long intergenic non-protein coding RNA 838	ncRNA	11.47
chr11-55	chr11	118928190	118928453	Intergenic	Intergenic	-17417	NM_182557	283149	Hs.414740	NM_182557	ENSG00000186174	BCL9L	BCL9-2|DLNB11	B cell CLL/lymphoma 9 like	protein-coding	11.47
chr3-98	chr3	171796694	171796963	Genebody	L2c|LINE|L2	13666	NM_001130081	5337	Hs.382865	NM_002662	ENSG00000075651	PLD1	CVDD	phospholipase D1	protein-coding	11.46
chr20-114	chr20	63559449	63559718	Genebody	intron (NM_001037335, intron 19 of 19)	5377	NM_001319153	79025	Hs.197755	NM_024059	ENSG00000125531	FNDC11	C20orf195	fibronectin type III domain containing 11	protein-coding	11.46
chr7-80	chr7	2709546	2709815	Genebody	exon (NM_133463, exon 6 of 7)	21478	NM_001284355	155185	Hs.42221	NM_133463	ENSG00000174945	AMZ1	-	archaelysin family metallopeptidase 1	protein-coding	11.46
chr1-352	chr1	228406781	228407050	Promoter	promoter-TSS (NM_145214)	-99	NM_145214	81559	Hs.13543	NM_145214	ENSG00000154370	TRIM11	BIA1|RNF92	tripartite motif containing 11	protein-coding	11.46
chr5-100	chr5	156922252	156922521	Genebody	intron (NM_001146726, intron 5 of 7)	40869	NM_001146726	91937	Hs.334907	NM_138379	ENSG00000145850	TIMD4	SMUCKLER|TIM4	T cell immunoglobulin and mucin domain containing 4	protein-coding	11.46
chr16-84	chr16	46974341	46974595	Promoter	promoter-TSS (NM_005880)	-754	NM_005880	10294	Hs.368078	NM_005880	ENSG00000069345	DNAJA2	CPR3|DJ3|DJA2|DNAJ|DNJ3|HIRIP4|PRO3015|RDJ2	DnaJ heat shock protein family (Hsp40) member A2	protein-coding	11.45
chr7-82	chr7	27890218	27890471	Genebody	intron (NM_175061, intron 3 of 4)	150249	NM_001206902	8887	Hs.34576	NM_006024	ENSG00000106052	TAX1BP1	CALCOCO3|T6BP|TXBP151	Tax1 binding protein 1	protein-coding	11.44
chr14-68	chr14	58428339	58428592	Promoter	promoter-TSS (NR_130750)	789	NM_001329946	9786	Hs.232532	NM_014749	ENSG00000100578	KIAA0586	JBTS23|SRTD14|Talpid3	KIAA0586	protein-coding	11.44
chr11-67	chr11	115928069	115928334	Intergenic	Intergenic	-168001	NR_034148	283143	Hs.130499	NR_034148		LINC00900	-	long intergenic non-protein coding RNA 900	ncRNA	11.44
chr3-86	chr3	4426809	4427076	Genebody	intron (NM_001164674, intron 2 of 7)	40340	NM_182760	285362	Hs.350475	NM_182760	ENSG00000144455	SUMF1	AAPA3037|FGE|UNQ3037	sulfatase modifying factor 1	protein-coding	11.44
chr16-118	chr16	71289316	71289585	Promoter	promoter-TSS (NM_001099642)	-23	NM_001324378	55783	Hs.72782	NM_018348	ENSG00000180917	CMTR2	AFT|FTSJD1|HMTr2|MTr2	cap methyltransferase 2	protein-coding	11.43
chr2-127	chr2	197145479	197145748	Genebody	intron (NM_001195144, intron 3 of 27)	-52378	NR_135584	101927596		NR_135584	ENSG00000231621	LOC101927596	-	uncharacterized LOC101927596	ncRNA	11.43
chr7-69	chr7	150685474	150685743	Promoter	promoter-TSS (NM_015660)	-98	NM_015660	26157	Hs.647071	NM_015660	ENSG00000106560	GIMAP2	HIMAP2|IAN12|IMAP2	GTPase, IMAP family member 2	protein-coding	11.43
chr21-88	chr21	7424428	7424673	Intergenic	Intergenic	-6087	NM_001322036	102724951	Hs.743984	NM_001322036		LOC102724951	-	uncharacterized LOC102724951	protein-coding	11.43
chr7-57	chr7	128963466	128963727	Genebody	intron (NR_034053, intron 22 of 23)	22926	NM_001098627	3663	Hs.521181	NM_032643	ENSG00000128604	IRF5	SLEB10	interferon regulatory factor 5	protein-coding	11.42
chr1-217	chr1	180502271	180502539	Promoter	5' UTR (NM_032360, exon 1 of 8)	482	NM_032360	84320	Hs.200051	NM_032360	ENSG00000230124	ACBD6	-	acyl-CoA binding domain containing 6	protein-coding	11.42
chr3-90	chr3	45657879	45658144	Genebody	intron (NM_014240, intron 2 of 7)	30871	NR_033947	644714	Hs.712889	NR_033947		LIMD1-AS1	-	LIMD1 antisense RNA 1	ncRNA	11.41
chr17-110	chr17	76726858	76727122	Promoter	promoter-TSS (NM_015167)	160	NM_001302705	124512	Hs.74655	NM_001080510	ENSG00000181038	METTL23	C17orf95|MRT44	methyltransferase like 23	protein-coding	11.4
chr10-134	chr10	126041937	126042187	Genebody	3' UTR (NM_021641, exon 19 of 19)	-68789	NR_102707	101410540	Hs.557889	NR_102707	ENSG00000233409	FANK1-AS1	-	FANK1 antisense RNA 1	ncRNA	11.4
chr5-102	chr5	10685220	10685479	Genebody	intron (NM_004394, intron 2 of 3)	75926	NM_004394	1611	Hs.75189	NM_004394	ENSG00000112977	DAP	-	death associated protein	protein-coding	11.4
chr12-92	chr12	54053716	54053985	Promoter	promoter-TSS (NM_153633)	-27	NM_153633	3221	Hs.549040	NM_014620	ENSG00000198353	HOXC4	HOX3|HOX3E|cp19	homeobox C4	protein-coding	11.38
chr19-118	chr19	49897823	49898092	Promoter	intron (NR_047577, intron 4 of 10)	-1067	NM_152899	259307	Hs.574492	NM_152899	ENSG00000104951	IL4I1	FIG1|LAAO|LAO	interleukin 4 induced 1	protein-coding	11.38
chr11-74	chr11	57425136	57425404	Promoter	intron (NM_199329, intron 4 of 13)	1817	NM_014096	29015	Hs.99962	NM_014096	ENSG00000134802	SLC43A3	EEG1|FOAP-13|PRO1659|SEEEG-1	solute carrier family 43 member 3	protein-coding	11.37
chr6-87	chr6	32968627	32968884	Promoter	promoter-TSS (NM_005104)	95	NM_005104	6046	Hs.75243	NM_005104	ENSG00000204256	BRD2	BRD2-IT1|D6S113E|FSH|FSRG1|NAT|O27.1.1|RING3|RNF3	bromodomain containing 2	protein-coding	11.37
chr4-75	chr4	40194965	40195228	Promoter	L4_A_Mam|LINE|RTE-X	1447	NM_001278369	399	Hs.654594	NM_004310	ENSG00000168421	RHOH	ARHH|TTF	ras homolog family member H	protein-coding	11.36
chr20-47	chr20	53660348	53660604	Intergenic	CpG	52122	NR_134576	105372672	Hs.259350	NR_134576	ENSG00000235415	LOC105372672	-	uncharacterized LOC105372672	ncRNA	11.36
chr20-76	chr20	10350875	10351144	Intergenic	MER41A|LTR|ERV1	80916	NM_018848	8195	Hs.472119	NM_018848	ENSG00000125863	MKKS	BBS6|HMCS|KMS|MKS	McKusick-Kaufman syndrome	protein-coding	11.35
chr5-138	chr5	69332748	69332998	Promoter	promoter-TSS (NM_001297697)	-80	NM_001297696	202243	Hs.654850	NM_176816	ENSG00000183323	CCDC125	KENAE	coiled-coil domain containing 125	protein-coding	11.35
chr12-78	chr12	56468392	56468661	Promoter	promoter-TSS (NM_207344)	9	NM_207344	283377	Hs.128676	NM_207344	ENSG00000176422	SPRYD4	-	SPRY domain containing 4	protein-coding	11.35
chr6-171	chr6	139580873	139581133	Intergenic	Intergenic	-106407	NR_033919	645434	Hs.666240	NR_033919	ENSG00000238099	LINC01625	-	long intergenic non-protein coding RNA 1625	ncRNA	11.35
chr8-47	chr8	65634123	65634386	Promoter	promoter-TSS (NM_018120)	-37	NM_018120	55156	Hs.269542	NM_018120	ENSG00000104442	ARMC1	Arcp	armadillo repeat containing 1	protein-coding	11.33
chr1-234	chr1	15949713	15949969	Genebody	intron (NM_001287603, intron 2 of 15)	26291	NM_001324137	7709	Hs.433764	NM_003443	ENSG00000116809	ZBTB17	MIZ-1|ZNF151|ZNF60|pHZ-67	zinc finger and BTB domain containing 17	protein-coding	11.33
chr11-72	chr11	74949081	74949350	Promoter	promoter-TSS (NM_001270381)	-28	NM_182969	143570	Hs.370145	NM_182969	ENSG00000166435	XRRA1	-	X-ray radiation resistance associated 1	protein-coding	11.32
chr16-90	chr16	10775413	10775682	Genebody	5' UTR (NM_001318873, exon 3 of 8)	31678	NM_001323597	4682	Hs.81469	NM_002484	ENSG00000103274	NUBP1	NBP|NBP1|NBP35	nucleotide binding protein 1	protein-coding	11.32
chr4-98	chr4	83013018	83013274	Promoter	promoter-TSS (NM_001115007)	-205	NM_001115007	132660	Hs.96952	NM_194282	ENSG00000189308	LIN54	CXCDC1|JC8.6|MIP120|TCX1	lin-54 DREAM MuvB core complex component	protein-coding	11.31
chr22-81	chr22	35064683	35064951	Promoter	MLT1J2|LTR|ERVL-MaLR	-1319	NM_001303508	91464	Hs.567637	NM_001008494	ENSG00000175329	ISX	Pix-1|RAXLX	intestine specific homeobox	protein-coding	11.31
chr6-101	chr6	32685641	32685867	Intergenic	Intergenic	-19065	NM_001243961	3119	Hs.409934	NM_002123	ENSG00000179344	HLA-DQB1	CELIAC1|HLA-DQB|IDDM1	major histocompatibility complex, class II, DQ beta 1	protein-coding	11.31
chr9-86	chr9	134407500	134407760	Promoter	intron (NM_001291921, intron 1 of 8)	1048	NM_001291921	6256	Hs.590886	NM_002957	ENSG00000186350	RXRA	NR2B1	retinoid X receptor alpha	protein-coding	11.3
chr4-86	chr4	102869140	102869377	Promoter	promoter-TSS (NM_181893)	280	NM_001008388	493856	Hs.444955	NM_001008388	ENSG00000145354	CISD2	ERIS|Miner1|NAF-1|WFS2|ZCD2	CDGSH iron sulfur domain 2	protein-coding	11.3
chr11-51	chr11	102560602	102560832	Intergenic	Intergenic	-29964	NM_002423	4316	Hs.2256	NM_002423	ENSG00000137673	MMP7	MMP-7|MPSL1|PUMP-1	matrix metallopeptidase 7	protein-coding	11.3
chr13-41	chr13	21061423	21061687	Promoter	promoter-TSS (NM_014572)	28	NM_014572	26524	Hs.78960	NM_014572	ENSG00000150457	LATS2	KPM	large tumor suppressor kinase 2	protein-coding	11.29
chr1-229	chr1	25022458	25022706	Promoter	promoter-TSS (NR_039623)	-921	NR_039623	100616365		NR_039623	ENSG00000264371	MIR4425	-	microRNA 4425	ncRNA	11.29
chr3-142	chr3	192171278	192171543	Genebody	intron (NM_021032, intron 3 of 4)	-67220	NR_046596	100873986	Hs.581652	NR_046596	ENSG00000231383	FGF12-AS1	-	FGF12 antisense RNA 1	ncRNA	11.28
chr20-85	chr20	46111273	46111542	Intergenic	MLT1F1|LTR|ERVL-MaLR	-6847	NM_001250	958	Hs.472860	NM_001250	ENSG00000101017	CD40	Bp50|CDW40|TNFRSF5|p50	CD40 molecule	protein-coding	11.27
chr13-42	chr13	99228753	99229013	Genebody	intron (NM_177967, intron 1 of 6)	27974	NM_177967	337867	Hs.508545	NM_177967	ENSG00000134882	UBAC2	PHGDHL1	UBA domain containing 2	protein-coding	11.27
chr16-112	chr16	28924069	28924329	Promoter	intron (NM_024816, intron 2 of 12)	1012	NM_024816	79874	Hs.555978	NM_024816	ENSG00000177548	RABEP2	FRA	rabaptin, RAB GTPase binding effector protein 2	protein-coding	11.27
chr7-118	chr7	74587493	74587759	Genebody	intron (NM_016328, intron 22 of 26)	-70039	NM_001518	2969	Hs.647041	NM_001518	ENSG00000263001	GTF2I	BAP135|BTKAP1|DIWS|GTFII-I|IB291|SPIN|TFII-I|WBS|WBSCR6	general transcription factor IIi	protein-coding	11.26
chrX-36	chrX	83634890	83635152	Intergenic	LTR13|LTR|ERVK	126760	NM_000307	5456	Hs.2229	NM_000307	ENSG00000196767	POU3F4	BRAIN-4|BRN-4|BRN4|DFN3|DFNX2|OCT-9|OTF-9|OTF9	POU class 3 homeobox 4	protein-coding	11.24
chr20-41	chr20	43909769	43910038	Intergenic	MLT1I|LTR|ERVL-MaLR	-4949	NM_001098797	84969	Hs.26608	NM_032883	ENSG00000124191	TOX2	C20orf100|GCX-1|GCX1|dJ1108D11.2|dJ495O3.1	TOX high mobility group box family member 2	protein-coding	11.24
chr21-58	chr21	6715552	6715821	Intergenic	Intergenic	-142764	NR_146656	110091777	Hs.580917	NR_146655		LOC110091777	-	uncharacterized LOC110091777	ncRNA	11.24
chr11-50	chr11	65487638	65487907	Intergenic	Intergenic	-9966	NR_144567	378938	Hs.621695	NR_002819	ENSG00000251562	MALAT1	HCN|LINC00047|NCRNA00047|NEAT2|PRO2853	metastasis associated lung adenocarcinoma transcript 1 (non-protein coding)	ncRNA	11.24
chr20-43	chr20	32819595	32819864	Promoter	promoter-TSS (NM_012325)	-164	NM_012325	22919	Hs.472437	NM_012325	ENSG00000101367	MAPRE1	EB1	microtubule associated protein RP/EB family member 1	protein-coding	11.24
chr12-126	chr12	107685101	107685370	Promoter	promoter-TSS (NM_001317963)	-497	NM_007062	11137	Hs.506652	NM_007062	ENSG00000136045	PWP1	IEF-SSP-9502	PWP1 homolog, endonuclein	protein-coding	11.24
chr17-178	chr17	42566900	42567148	Promoter	promoter-TSS (NM_170607)	-36	NM_198205	6945	Hs.383019	NM_170607	ENSG00000108788	MLX	MAD7|MXD7|TCFL4|TF4|bHLHd13	MLX, MAX dimerization protein	protein-coding	11.23
chr16-103	chr16	67935702	67935971	Promoter	CpG-9855	1041	NM_002801	5699	Hs.9661	NM_002801	ENSG00000205220	PSMB10	LMP10|MECL1|beta2i	proteasome subunit beta 10	protein-coding	11.22
chr18-29	chr18	45827732	45828001	Genebody	intron (NM_213602, intron 1 of 5)	2286	NM_213602	284266	Hs.287692	NM_213602	ENSG00000197046	SIGLEC15	CD33L3|HsT1361|SIGLEC-15	sialic acid binding Ig like lectin 15	protein-coding	11.22
chr2-143	chr2	143132435	143132689	Genebody	MLT1K|LTR|ERVL-MaLR	3232	NM_018460	55843	Hs.171011	NM_018460	ENSG00000075884	ARHGAP15	BM046	Rho GTPase activating protein 15	protein-coding	11.2
chr2-154	chr2	113859455	113859710	Genebody	Tigger20a|DNA|TcMar-Tigger	-30352	NM_005721	10096	Hs.433512	NM_005721	ENSG00000115091	ACTR3	ARP3	ARP3 actin related protein 3 homolog	protein-coding	11.18
chr7-89	chr7	101138551	101138808	Genebody	3' UTR (NM_000602, exon 9 of 9)	11590	NM_000602	5054	Hs.414795	NM_000602	ENSG00000106366	SERPINE1	PAI|PAI-1|PAI1|PLANH1	serpin family E member 1	protein-coding	11.18
chr2-242	chr2	231717282	231717550	Intergenic	MLT1K|LTR|ERVL-MaLR	4102	NR_036052	100302285		NR_036052	ENSG00000284378	MIR1244-1	MIR1244|MIRN1244|hsa-mir-1244|hsa-mir-1244-1	microRNA 1244-1	ncRNA	11.18
chr11-65	chr11	117987134	117987396	Promoter	intron (NR_026691, intron 2 of 7)	874	NR_026691	3587	Hs.504035	NM_001558	ENSG00000110324	IL10RA	CD210|CD210a|CDW210A|HIL-10R|IL-10R1|IL10R	interleukin 10 receptor subunit alpha	protein-coding	11.16
chr2-103	chr2	190701681	190701948	Intergenic	Charlie4z|DNA|hAT-Charlie	42656	NM_001321314	4664	Hs.107474	NM_005966	ENSG00000138386	NAB1	-	NGFI-A binding protein 1	protein-coding	11.16
chr17-155	chr17	81894013	81894282	Genebody	AluSz6|SINE|Alu	2220	NM_001289420	51529	Hs.534456	NM_016476	ENSG00000141552	ANAPC11	APC11|Apc11p|HSPC214	anaphase promoting complex subunit 11	protein-coding	11.16
chr10-115	chr10	124733192	124733461	Genebody	intron (NM_014661, intron 1 of 4)	11035	NM_014661	9679	Hs.129195	NM_014661	ENSG00000189319	FAM53B	KIAA0140|bA12J10.2|smp	family with sequence similarity 53 member B	protein-coding	11.16
chr18-63	chr18	25815120	25815379	Intergenic	Intergenic	275398	NM_001007559	6760	Hs.129261	NM_005637	ENSG00000141380	SS18	SSXT|SYT	SS18, nBAF chromatin remodeling complex subunit	protein-coding	11.15
chr6-98	chr6	25962501	25962770	Promoter	promoter-TSS (NM_006355)	-54	NM_006355	10475	Hs.584851	NM_006355	ENSG00000112343	TRIM38	RNF15|RORET	tripartite motif containing 38	protein-coding	11.14
chr10-117	chr10	102461118	102461387	Promoter	promoter-TSS (NM_024789)	-161	NM_024789	79847	Hs.309069	NM_024789	ENSG00000138111	MFSD13A	C10orf77|TMEM180|bA18I14.8	major facilitator superfamily domain containing 13A	protein-coding	11.14
chr2-170	chr2	174072158	174072425	Genebody	TTS (NM_001328688)	47011	NR_136175	100128905	Hs.456944	NR_136175	ENSG00000260868	LINC01960	-	long intergenic non-protein coding RNA 1960	ncRNA	11.14
chr2-107	chr2	233082476	233082655	Genebody	intron (NM_001017915, intron 2 of 26)	22598	NM_001017915	3635	Hs.262886	NM_005541	ENSG00000168918	INPP5D	SHIP|SHIP-1|SHIP1|SIP-145|hp51CN|p150Ship	inositol polyphosphate-5-phosphatase D	protein-coding	11.13
chr11-58	chr11	128830455	128830712	Intergenic	MIRb|SINE|MIR	11951	NM_000220	3758	Hs.527830	NM_000220	ENSG00000151704	KCNJ1	KIR1.1|ROMK|ROMK1	potassium voltage-gated channel subfamily J member 1	protein-coding	11.12
chr9-75	chr9	38319122	38319383	Intergenic	Intergenic	-73412	NM_000692	219	Hs.436219	NM_000692	ENSG00000137124	ALDH1B1	ALDH5|ALDHX	aldehyde dehydrogenase 1 family member B1	protein-coding	11.12
chr9-103	chr9	100352843	100353112	Promoter	promoter-TSS (NM_001161584)	0	NM_017746	54881	Hs.494648	NM_017746	ENSG00000136891	TEX10	Ipi1|bA208F1.2	testis expressed 10	protein-coding	11.11
chr5-95	chr5	169970365	169970614	Genebody	intron (NM_001346304, intron 1 of 3)	10268	NM_001346304	100131897	Hs.721917	NM_001129891	ENSG00000204767	FAM196B	C5orf57	family with sequence similarity 196 member B	protein-coding	11.1
chr19-127	chr19	4108873	4109139	Genebody	MIRc|SINE|MIR	15123	NM_030662	5605	Hs.465627	NM_030662	ENSG00000126934	MAP2K2	CFC4|MAPKK2|MEK2|MKK2|PRKMK2	mitogen-activated protein kinase kinase 2	protein-coding	11.1
chr9-39	chr9	131274709	131274975	Promoter	intron (NM_033387, intron 1 of 1)	1677	NM_033387	286336	Hs.143878	NM_033387	ENSG00000126882	FAM78A	C9orf59	family with sequence similarity 78 member A	protein-coding	11.1
chr9-58	chr9	127984011	127984268	Intergenic	L2a|LINE|L2	-3606	NM_001035254	399665	Hs.535972	NM_203305	ENSG00000167106	FAM102A	C9orf132|EEIG1|SYM-3A|bA203J24.7	family with sequence similarity 102 member A	protein-coding	11.09
chr8-95	chr8	42052187	42052433	Promoter	promoter-TSS (NM_001305878)	-284	NM_001305878	7994	Hs.491577	NM_006766	ENSG00000083168	KAT6A	MOZ|MRD32|MYST-3|MYST3|RUNXBP2|ZC2HC6A|ZNF220	lysine acetyltransferase 6A	protein-coding	11.09
chr8-53	chr8	79651112	79651381	Genebody	intron (NM_007029, intron 3 of 4)	40432	NM_001199214	11075	Hs.521651	NM_007029	ENSG00000104435	STMN2	SCG10|SCGN10	stathmin 2	protein-coding	11.08
chr17-140	chr17	19648575	19648844	Promoter	promoter-TSS (NM_000382)	-42	NM_000382	224	Hs.499886	NM_000382	ENSG00000072210	ALDH3A2	ALDH10|FALDH|SLS	aldehyde dehydrogenase 3 family member A2	protein-coding	11.08
chr9-77	chr9	127396623	127396892	Promoter	promoter-TSS (NR_073416)	-381	NM_001271712	29988	Hs.179522	NM_014580	ENSG00000136856	SLC2A8	GLUT8|GLUTX1	solute carrier family 2 member 8	protein-coding	11.08
chr1-244	chr1	211939926	211940195	Genebody	TTS (NM_001199812)	-95493	NM_001286229	51514	Hs.656473	NM_016448	ENSG00000143476	DTL	CDT2|DCAF2|L2DTL|RAMP	denticleless E3 ubiquitin protein ligase homolog	protein-coding	11.08
chr15-43	chr15	41115581	41115817	Promoter	intron (NR_104038, intron 1 of 34)	547	NM_017553	54617	Hs.292949	NM_017553	ENSG00000128908	INO80	INO80A|INOC1|hINO80	INO80 complex subunit	protein-coding	11.07
chr1-256	chr1	152968277	152968544	Intergenic	MIRb|SINE|MIR	-2243	NM_173080	163778	Hs.433629	NM_173080	ENSG00000184148	SPRR4	-	small proline rich protein 4	protein-coding	11.06
chr19-146	chr19	7679335	7679594	Promoter	3' UTR (NM_174918, exon 7 of 7)	-1357	NM_001042462	126003	Hs.432413	NM_174894	ENSG00000181029	TRAPPC5	TRS31	trafficking protein particle complex 5	protein-coding	11.06
chr16-153	chr16	89700211	89700476	Promoter	intron (NM_152339, intron 2 of 2)	1370	NM_152339	124044	Hs.374556	NM_152339	ENSG00000158792	SPATA2L	C16orf76|tamo	spermatogenesis associated 2 like	protein-coding	11.06
chr9-87	chr9	1758986	1759255	Intergenic	Intergenic	-256099	NM_001289397	6595	Hs.298990	NM_003070	ENSG00000080503	SMARCA2	BAF190|BRM|NCBRS|SNF2|SNF2L2|SNF2LA|SWI2|Sth1p|hBRM|hSNF2a	SWI/SNF related, matrix associated, actin dependent regulator of chromatin, subfamily a, member 2	protein-coding	11.05
chr4-89	chr4	159018116	159018385	Genebody	MLT2F|LTR|ERVL	16931	NM_152543	152940	Hs.415576	NM_152543	ENSG00000164123	C4orf45	-	chromosome 4 open reading frame 45	protein-coding	11.05
chr16-161	chr16	46689059	46689319	Promoter	promoter-TSS (NM_014321)	43	NM_018206	55737	Hs.454528	NM_018206	ENSG00000069329	VPS35	MEM3|PARK17	VPS35, retromer complex component	protein-coding	11.05
chr2-121	chr2	202965895	202966164	Genebody	MLT1F2|LTR|ERVL-MaLR	-48850	NM_001114132	65065	Hs.648846	NM_198945	ENSG00000144426	NBEAL1	A530083I02Rik|ALS2CR16|ALS2CR17	neurobeachin like 1	protein-coding	11.03
chr1-222	chr1	26319571	26319832	Promoter	intron (NM_001803, intron 1 of 1)	-1436	NM_145345	91544	Hs.145061	NM_145345	ENSG00000158062	UBXN11	COA-1|PP2243|SOC|SOCI|UBXD5	UBX domain protein 11	protein-coding	11.03
chr2-149	chr2	54524800	54525069	Genebody	L2a|LINE|L2	-4288	NR_002229	56969	Hs.657366	NM_020217		RPL23AP32	RPL23A_9_220	ribosomal protein L23a pseudogene 32	pseudo	11.03
chr4-56	chr4	75724264	75724533	Promoter	promoter-TSS (NM_001290049)	-124	NM_003715	8615	Hs.744877	NM_003715	ENSG00000138768	USO1	P115|TAP|VDP	USO1 vesicle transport factor	protein-coding	11.03
chr4-135	chr4	36651390	36651646	Intergenic	Intergenic	-9618	NR_149124	105374400	Hs.570781	NR_149124	ENSG00000248215	LINC02505	-	long intergenic non-protein coding RNA 2505	ncRNA	11.02
chr15-54	chr15	44663633	44663882	Promoter	promoter-TSS (NM_025137)	-79	NM_025137	80208	Hs.656271	NM_025137	ENSG00000104133	SPG11	ALS5|CMT2X|KIAA1840	SPG11, spatacsin vesicle trafficking associated	protein-coding	11.02
chr17-193	chr17	78128788	78129052	Promoter	promoter-TSS (NM_001321185)	-126	NM_001321185	11322	Hs.632227	NM_007267	ENSG00000141524	TMC6	EV1|EVER1|EVIN1|LAK-4P	transmembrane channel like 6	protein-coding	10.99
chr5-77	chr5	76590118	76590375	Genebody	intron (NM_001285460, intron 6 of 34)	18723	NR_134278	101929109	Hs.665172	NR_134278	ENSG00000249713	LOC101929109	-	uncharacterized LOC101929109	ncRNA	10.98
chr12-68	chr12	19894909	19895164	Intergenic	Intergenic	-119649	NR_040098	100506393	Hs.658356	NR_040098	ENSG00000256287	LINC02398	-	long intergenic non-protein coding RNA 2398	ncRNA	10.98
chr2-179	chr2	80530513	80530782	Genebody	intron (NM_004389, intron 9 of 17)	217268	NM_001282599	1496	Hs.167368	NM_004389	ENSG00000066032	CTNNA2	CAP-R|CAPR|CT114|CTNR	catenin alpha 2	protein-coding	10.97
chr17-116	chr17	81967911	81968180	Intergenic	Intergenic	-6864	NM_178493	147111	Hs.106137	NM_178493	ENSG00000185269	NOTUM	hNOTUM	notum, palmitoleoyl-protein carboxylesterase	protein-coding	10.97
chr20-94	chr20	62585093	62585362	Intergenic	(CA)n|Simple_repeat|Simple_repeat	20315	NR_029676	406923		NR_029676	ENSG00000284508	MIR133A2	MIRN133A2|mir-133a-2	microRNA 133a-2	ncRNA	10.97
chr8-100	chr8	75149044	75149313	Intergenic	Intergenic	129303	NR_103850	101805492	Hs.571424	NR_103848		CASC9	ESCCAL-1|ESSCAL1|LINC00981	cancer susceptibility 9 (non-protein coding)	ncRNA	10.97
chr17-203	chr17	49566050	49566302	Genebody	L2c|LINE|L2	7888	NR_103773	100288866	Hs.720309	NR_103773	ENSG00000249906	LOC100288866	-	uncharacterized LOC100288866	ncRNA	10.97
chr5-96	chr5	89343646	89343889	Genebody	intron (NR_136219, intron 7 of 9)	-439662	NM_001131005	4208	Hs.649965	NM_002397	ENSG00000081189	MEF2C	C5DELq14.3|DEL5q14.3	myocyte enhancer factor 2C	protein-coding	10.96
chr6-92	chr6	30721517	30721766	Promoter	promoter-TSS (NM_001293212)	92	NM_001293212	203068	Hs.636480	NM_178014	ENSG00000196230	TUBB	CDCBM6|CSCSC1|M40|OK/SW-cl.56|TUBB1|TUBB5	tubulin beta class I	protein-coding	10.96
chr6-123	chr6	17470234	17470503	Genebody	intron (NM_006366, intron 4 of 12)	40897	NR_110855	101928491	Hs.622876	NR_110855		LOC101928491	-	uncharacterized LOC101928491	ncRNA	10.95
chr2-141	chr2	84943174	84943443	Intergenic	Intergenic	-27800	NM_020122	56888	Hs.654968	NM_020122	ENSG00000176407	KCMF1	DEBT91|FIGC|PCMF|ZZZ1	potassium channel modulatory factor 1	protein-coding	10.95
chr20-64	chr20	1871908	1872173	Intergenic	Intergenic	-22127	NM_001040022	140885	Hs.581021	NM_080792	ENSG00000198053	SIRPA	BIT|CD172A|MFR|MYD-1|P84|PTPNS1|SHPS1|SIRP	signal regulatory protein alpha	protein-coding	10.95
chr12-99	chr12	92403879	92404144	Intergenic	Intergenic	-17520	NR_027932	574028	Hs.730377	NM_001025233	ENSG00000257127	CLLU1	-	chronic lymphocytic leukemia up-regulated 1	ncRNA	10.95
chr11-97	chr11	102447255	102447524	Genebody	MIRb|SINE|MIR	-5530	NR_135053	101928424	Hs.647210	NR_135053	ENSG00000255337	LOC101928424	-	uncharacterized LOC101928424	ncRNA	10.95
chr11-60	chr11	82969877	82970133	Intergenic	Intergenic	64564	NM_001286059	27314	Hs.40758	NM_014488	ENSG00000137502	RAB30	-	RAB30, member RAS oncogene family	protein-coding	10.94
chr21-117	chr21	45255399	45255663	Genebody	intron (NR_135279, intron 2 of 2)	21191	NR_135279	114042	Hs.375832	NR_135279	ENSG00000182586	LINC00334	C21orf89|NCRNA00334	long intergenic non-protein coding RNA 334	ncRNA	10.94
chr11-115	chr11	72430813	72431070	Genebody	MIRc|SINE|MIR	3743	NM_001258393	81570	Hs.523877	NM_030813	ENSG00000162129	CLPB	ANKCLB|HSP78|MEGCANN|MGCA7|SKD3	ClpB homolog, mitochondrial AAA ATPase chaperonin	protein-coding	10.93
chr12-89	chr12	92034967	92035225	Genebody	intron (NR_046160, intron 1 of 5)	106617	NR_046159	256021	Hs.651357	NM_001256373	ENSG00000257242	LINC01619	C12orf79	long intergenic non-protein coding RNA 1619	ncRNA	10.91
chr1-249	chr1	171625274	171625537	Intergenic	MIRc|SINE|MIR	27228	NM_000261	4653	Hs.436037	NM_000261	ENSG00000034971	MYOC	GLC1A|GPOA|JOAG|JOAG1|TIGR	myocilin	protein-coding	10.9
chr16-99	chr16	3024181	3024450	Promoter	promoter-TSS (NM_017885)	-29	NM_001288666	54985	Hs.423103	NM_017885	ENSG00000103145	HCFC1R1	HPIP	host cell factor C1 regulator 1	protein-coding	10.89
chr1-255	chr1	109090576	109090843	Promoter	promoter-TSS (NR_136242)	-32	NM_001322248	56900	Hs.82933	NM_020141	ENSG00000215717	TMEM167B	AD-020|C1orf119	transmembrane protein 167B	protein-coding	10.89
chr3-126	chr3	45553499	45553768	Intergenic	MLT1J1|LTR|ERVL-MaLR	-41198	NM_014240	8994	Hs.193370	NM_014240	ENSG00000144791	LIMD1	-	LIM domains containing 1	protein-coding	10.89
chr19-141	chr19	7219881	7220150	Genebody	MLT1K|LTR|ERVL-MaLR	74287	NM_000208	3643	Hs.465744	NM_000208	ENSG00000171105	INSR	CD220|HHF5	insulin receptor	protein-coding	10.89
chr4-60	chr4	112232270	112232510	Promoter	CpG	651	NM_018569	55435	Hs.435991	NM_018569	ENSG00000138660	AP1AR	2C18|C4orf16|GBAR|PRO0971|gamma-BAR	adaptor related protein complex 1 associated regulatory protein	protein-coding	10.89
chr10-108	chr10	44008309	44008577	Intergenic	Intergenic	96041	NR_136148	283033	Hs.178244	NR_033846		LINC00841	-	long intergenic non-protein coding RNA 841	ncRNA	10.88
chr2-138	chr2	136238872	136239137	Intergenic	Intergenic	-120849	NM_001348056	7852	Hs.593413	NM_003467	ENSG00000121966	CXCR4	CD184|D2S201E|FB22|HM89|HSY3RR|LAP-3|LAP3|LCR1|LESTR|NPY3R|NPYR|NPYRL|NPYY3R|WHIM|WHIMS	C-X-C motif chemokine receptor 4	protein-coding	10.87
chr5-193	chr5	127875566	127875835	Genebody	intron (NM_001317938, intron 6 of 6)	172311	NM_001317938	728586	Hs.582532	NM_001317938	ENSG00000230561	CCDC192	LINC01183	coiled-coil domain containing 192	protein-coding	10.87
chr16-166	chr16	3459118	3459387	Promoter	intron (NM_001317095, intron 1 of 5)	1267	NM_001317097	79903	Hs.513296	NM_024845	ENSG00000122390	NAA60	HAT4|NAT15|NatF|hNaa60	N(alpha)-acetyltransferase 60, NatF catalytic subunit	protein-coding	10.87
chr18-36	chr18	63075211	63075480	Intergenic	MLT1N2|LTR|ERVL-MaLR	244035	NM_000633	596	Hs.150749	NM_000633	ENSG00000171791	BCL2	Bcl-2|PPP1R50	BCL2, apoptosis regulator	protein-coding	10.87
chr12-249	chr12	25328134	25328403	Intergenic	Charlie29a|DNA|hAT-Charlie	-77337	NM_004985	3845	Hs.505033	NM_004985	ENSG00000133703	KRAS	C-K-RAS|CFC2|K-RAS2A|K-RAS2B|K-RAS4A|K-RAS4B|K-Ras|KI-RAS|KRAS1|KRAS2|NS|NS3|RALD|RASK2|c-Ki-ras2	KRAS proto-oncogene, GTPase	protein-coding	10.87
chr17-162	chr17	63945857	63946126	Genebody	intron (NM_000334, intron 18 of 23)	-13637	NM_021602	974	Hs.89575	NM_000626	ENSG00000007312	CD79B	AGM6|B29|IGB	CD79b molecule	protein-coding	10.87
chr1-202	chr1	156158999	156159255	Genebody	AluSz6|SINE|Alu	5549	NM_001193302	64218	Hs.408846	NM_022367	ENSG00000196189	SEMA4A	CORD10|RP35|SEMAB|SEMB	semaphorin 4A	protein-coding	10.86
chr22-77	chr22	50241565	50241821	Genebody	LTR13|LTR|ERVK	3278	NM_020461	85378	Hs.336431	NM_020461	ENSG00000128159	TUBGCP6	GCP-6|GCP6|MCCRP|MCCRP1|MCPHCR	tubulin gamma complex associated protein 6	protein-coding	10.86
chr7-164	chr7	100837416	100837654	Genebody	non-coding (NR_146550, exon 2 of 2)	-10014	NM_004444	2050	Hs.437008	NM_004444	ENSG00000196411	EPHB4	HFASD|HTK|MYK1|TYRO11	EPH receptor B4	protein-coding	10.86
chr11-64	chr11	65873684	65873948	Promoter	promoter-TSS (NM_016938)	-882	NR_037718	30008	Hs.731454	NM_016938	ENSG00000172638	EFEMP2	ARCL1B|FBLN4|MBP1|UPH1	EGF containing fibulin extracellular matrix protein 2	protein-coding	10.85
chr20-67	chr20	53827080	53827345	Intergenic	MSTC|LTR|ERVL-MaLR	48497	NR_002189	391257	Hs.449977	NR_002189		SUMO1P1	PIC1L|UBL2|UBL6	SUMO1 pseudogene 1	pseudo	10.84
chr14-65	chr14	93959547	93959814	Genebody	intron (NM_001202429, intron 2 of 9)	-2259	NM_016150	51676	Hs.510327	NM_016150	ENSG00000100628	ASB2	ASB-2	ankyrin repeat and SOCS box containing 2	protein-coding	10.81
chr6-79	chr6	156808305	156808574	Genebody	intron (NM_020732, intron 1 of 19)	-28708	NR_039676	100616154		NR_039676	ENSG00000271899	MIR4466	mir-4466	microRNA 4466	ncRNA	10.81
chr22-105	chr22	35156384	35156653	Genebody	MLT1K|LTR|ERVL-MaLR	74538	NR_126356	104310353	Hs.581009	NR_126356	ENSG00000233080	LINC01399	-	long intergenic non-protein coding RNA 1399	ncRNA	10.81
chr1-340	chr1	22428688	22428951	Intergenic	MLT1J|LTR|ERVL-MaLR	-23032	NM_001083621	9923	Hs.418966	NM_014870	ENSG00000184677	ZBTB40	ZNF923	zinc finger and BTB domain containing 40	protein-coding	10.81
chr1-250	chr1	26275680	26275948	Genebody	intron (NM_022778, intron 12 of 13)	-3908	NM_031286	83442	Hs.109051	NM_031286	ENSG00000142669	SH3BGRL3	HEL-S-297|SH3BP-1|TIP-B1	SH3 domain binding glutamate rich protein like 3	protein-coding	10.8
chr10-116	chr10	62638117	62638375	Genebody	intron (NM_199451, intron 5 of 7)	117798	NM_199452	22891	Hs.22653	NM_014951	ENSG00000138311	ZNF365	Su48|UAN|ZNF365D	zinc finger protein 365	protein-coding	10.8
chr7-87	chr7	117014769	117015038	Genebody	intron (NM_018412, intron 1 of 14)	-5308	NR_106748	102466616		NR_106748	ENSG00000283923	MIR6132	hsa-mir-6132	microRNA 6132	ncRNA	10.79
chr1-226	chr1	27884243	27884506	Genebody	intron (NM_001105556, intron 4 of 5)	11831	NM_004848	9473	Hs.10649	NM_004848	ENSG00000130775	THEMIS2	C1orf38|ICB-1|ICB1	thymocyte selection associated family member 2	protein-coding	10.79
chr10-118	chr10	73917121	73917390	Genebody	3' UTR (NM_001145031, exon 10 of 10)	5522	NM_001001791	414236	Hs.585453	NM_001001791	ENSG00000222047	C10orf55	-	chromosome 10 open reading frame 55	protein-coding	10.79
chr6-99	chr6	28079932	28080187	Promoter	promoter-TSS (NM_003447)	-645	NM_003447	7718	Hs.55481	NM_003447	ENSG00000197279	ZNF165	CT53|LD65|ZSCAN7	zinc finger protein 165	protein-coding	10.78
chr6-103	chr6	106702376	106702644	Intergenic	Intergenic	7025	NR_149100	105377926	Hs.635821	NR_149100	ENSG00000229654	LINC02526	-	long intergenic non-protein coding RNA 2526	ncRNA	10.77
chr1-185	chr1	204521276	204521505	Genebody	(TGTTT)n|Simple_repeat|Simple_repeat	5011	NM_002393	4194	Hs.497492	NM_002393	ENSG00000198625	MDM4	HDMX|MDMX|MRP1	MDM4, p53 regulator	protein-coding	10.75
chr16-111	chr16	12316178	12316442	Genebody	AluSc|SINE|Alu	339576	NM_032167	92017	Hs.458401	NM_032167	ENSG00000048471	SNX29	A-388D4.1|RUNDC2A	sorting nexin 29	protein-coding	10.74
chr3-156	chr3	4749000	4749267	Genebody	TTS (NR_004428)	2457	NR_004428	100126791	Hs.663059	NR_004428	ENSG00000235947	EGOT	EGO|NCRNA00190	eosinophil granule ontogeny transcript (non-protein coding)	ncRNA	10.73
chr19-168	chr19	18408045	18408308	Intergenic	Intergenic	-10571	NM_145256	126364	Hs.332156	NM_145256	ENSG00000175489	LRRC25	MAPA	leucine rich repeat containing 25	protein-coding	10.73
chr21-66	chr21	6273273	6273533	Intergenic	Intergenic	-6067	NM_001322047	102724843	Hs.743984	NM_001322047		LOC102724843	-	uncharacterized LOC102724843	protein-coding	10.72
chr1-294	chr1	153536172	153536436	Promoter	promoter-TSS (NM_014624)	-63	NM_014624	6277	Hs.275243	NM_014624	ENSG00000197956	S100A6	2A9|5B10|CABP|CACY|PRA|S10A6	S100 calcium binding protein A6	protein-coding	10.72
chr2-120	chr2	61017417	61017675	Promoter	promoter-TSS (NM_002618)	-115	NM_001322123	150962	Hs.368348	NM_144709	ENSG00000162927	PUS10	CCDC139|DOBI	pseudouridylate synthase 10	protein-coding	10.72
chr4-107	chr4	82430442	82430711	Promoter	promoter-TSS (NM_031372)	96	NM_021204	58478	Hs.18442	NM_021204	ENSG00000145293	ENOPH1	E1|MASA|MST145|mtnC	enolase-phosphatase 1	protein-coding	10.71
chr10-131	chr10	50260696	50260940	Intergenic	Intergenic	-12208	NM_019893	56624	Hs.512645	NM_019893	ENSG00000188611	ASAH2	BCDase|HNAC1|LCDase|N-CDase|NCDase	N-acylsphingosine amidohydrolase 2	protein-coding	10.71
chr2-129	chr2	37618395	37618661	Intergenic	MLT1H2|LTR|ERVL-MaLR	53671	NM_001270437	10602	Hs.369574	NM_006449	ENSG00000163171	CDC42EP3	BORG2|CEP3|UB1	CDC42 effector protein 3	protein-coding	10.69
chr1-283	chr1	76936773	76937018	Genebody	intron (NM_001320274, intron 2 of 2)	69487	NM_001320274	81849	Hs.149201	NM_030965	ENSG00000117069	ST6GALNAC5	SIAT7-E|SIAT7E|ST6GalNAcV	ST6 N-acetylgalactosaminide alpha-2,6-sialyltransferase 5	protein-coding	10.69
chr2-134	chr2	188978294	188978558	Promoter	promoter-TSS (NR_039947)	-265	NR_039947	100616324		NR_039947	ENSG00000283238	MIR1245B	-	microRNA 1245b	ncRNA	10.69
chr3-110	chr3	42025641	42025910	Intergenic	Intergenic	-61425	NR_146089	22906	Hs.535711	NM_014965	ENSG00000182606	TRAK1	MILT1|OIP106	trafficking kinesin protein 1	protein-coding	10.68
chr16-223	chr16	12580760	12581029	Intergenic	Intergenic	-139427	NR_039869	100616195		NR_039869	ENSG00000264733	MIR4718	-	microRNA 4718	ncRNA	10.68
chr16-146	chr16	10009734	10010003	Genebody	intron (NM_000833, intron 3 of 13)	172199	NM_001134408	2903	Hs.411472	NM_000833	ENSG00000183454	GRIN2A	EPND|FESD|GluN2A|LKS|NMDAR2A|NR2A	glutamate ionotropic receptor NMDA type subunit 2A	protein-coding	10.68
chr16-121	chr16	27254290	27254547	Genebody	intron (NM_145080, intron 2 of 7)	-13787	NR_037184	400512	Hs.434412	NR_037184	ENSG00000245888	FLJ21408	-	uncharacterized LOC400512	ncRNA	10.67
chr6-125	chr6	107330180	107330437	Genebody	MLT1J1|LTR|ERVL-MaLR	129267	NM_020381	57107	Hs.745008	NM_020381	ENSG00000164494	PDSS2	C6orf210|COQ10D3|DLP1|bA59I9.3|hDLP1	decaprenyl diphosphate synthase subunit 2	protein-coding	10.67
chr5-98	chr5	173616680	173616942	Promoter	promoter-TSS (NM_001159651)	-148	NM_138369	91272	Hs.425091	NM_138369	ENSG00000145919	BOD1	FAM44B	biorientation of chromosomes in cell division 1	protein-coding	10.66
chr21-92	chr21	6652170	6652434	Intergenic	THE1B|LTR|ERVL-MaLR	90382	NM_001320719	102724652	Hs.184085	NM_001314050	ENSG00000276076	CRYAA2	CRYAA	crystallin alpha A2	protein-coding	10.66
chr19-106	chr19	680714	680978	Genebody	intron (NM_005860, intron 3 of 4)	4457	NM_005860	10272	Hs.529038	NM_005860	ENSG00000070404	FSTL3	FLRG|FSRP	follistatin like 3	protein-coding	10.66
chr1-357	chr1	212488665	212488892	Intergenic	Intergenic	55891	NM_013349	29937	Hs.461787	NM_013349	ENSG00000117691	NENF	CIR2|SCIRP10|SPUF	neudesin neurotrophic factor	protein-coding	10.65
chr15-77	chr15	76905275	76905544	Promoter	promoter-TSS (NM_001353011)	48	NM_001353011	49855	Hs.458986	NM_020843	ENSG00000140386	SCAPER	MSTP063|ZNF291|Zfp291	S-phase cyclin A associated protein in the ER	protein-coding	10.63
chr3-144	chr3	66990250	66990519	Intergenic	MLT1I|LTR|ERVL-MaLR	-7919	NM_032505	84541	Hs.116665	NM_032505	ENSG00000163376	KBTBD8	TA-KRP|TAKRP	kelch repeat and BTB domain containing 8	protein-coding	10.63
chr6-82	chr6	16483620	16483889	Genebody	intron (NM_000332, intron 7 of 8)	245174	NM_006877	2766	Hs.484741	NM_006877	ENSG00000137198	GMPR	GMPR 1|GMPR1	guanosine monophosphate reductase	protein-coding	10.63
chr7-78	chr7	75534980	75535249	Genebody	3' UTR (NM_001243198, exon 29 of 29)	-6991	NR_028059	5387	Hs.659871	NM_005395	ENSG00000127957	PMS2P3	PMS2L3|PMS2L9|PMS5|PMSR3	PMS1 homolog 2, mismatch repair system component pseudogene 3	pseudo	10.63
chr18-32	chr18	58971114	58971345	Genebody	intron (NR_148459, intron 9 of 11)	-64450	NR_024021	390858	Hs.716280	NR_024021		OACYLP	ACYL3P	O-acyltransferase like, pseudogene	pseudo	10.62
chr19-162	chr19	17610462	17610728	Genebody	MLT1J|LTR|ERVL-MaLR	55001	NM_024656	79709	Hs.418795	NM_024656	ENSG00000130309	COLGALT1	ColGalT 1|GLT25D1	collagen beta(1-O)galactosyltransferase 1	protein-coding	10.61
chr8-124	chr8	125605991	125606260	Intergenic	MER4D|LTR|ERV1	173916	NM_001282985	10221	Hs.444947	NM_025195	ENSG00000173334	TRIB1	C8FW|GIG-2|GIG2|SKIP1|TRB-1|TRB1	tribbles pseudokinase 1	protein-coding	10.6
chr16-164	chr16	29710415	29710652	Intergenic	HUERS-P3b-int|LTR|ERV1	31525	NM_001318249	23475	Hs.513484	NM_014298	ENSG00000103485	QPRT	HEL-S-90n|QPRTase	quinolinate phosphoribosyltransferase	protein-coding	10.6
chr4-69	chr4	148442427	148442696	Promoter	promoter-TSS (NR_148974)	-41	NR_148974	4306	Hs.163924	NM_000901	ENSG00000151623	NR3C2	MCR|MLR|MR|NR3C2VIT	nuclear receptor subfamily 3 group C member 2	protein-coding	10.6
chr10-153	chr10	119080666	119080920	Promoter	promoter-TSS (NM_003750)	91	NM_003750	8661	Hs.523299	NM_003750	ENSG00000107581	EIF3A	EIF3|EIF3S10|P167|TIF32|eIF3-p170|eIF3-theta|p180|p185	eukaryotic translation initiation factor 3 subunit A	protein-coding	10.6
chr22-55	chr22	22450594	22450863	Intergenic	Intergenic	58459	NR_130642	140883	Hs.43834	NM_080764	ENSG00000275004	ZNF280B	5'OY11.1|D87009.C22.3|SUHW2|ZNF279|ZNF632	zinc finger protein 280B	protein-coding	10.6
chr19-185	chr19	14496353	14496622	Promoter	promoter-TSS (NM_005716)	-338	NM_202468	10755	Hs.655012	NM_005716	ENSG00000123159	GIPC1	C19orf3|GIPC|GLUT1CBP|Hs.6454|IIP-1|NIP|RGS19IP1|SEMCAP|SYNECTIIN|SYNECTIN|TIP-2	GIPC PDZ domain containing family member 1	protein-coding	10.6
chr1-274	chr1	116378182	116378445	Genebody	intron (NM_001160233, intron 1 of 22)	4446	NM_001160233	476	Hs.371889	NM_000701	ENSG00000163399	ATP1A1	-	ATPase Na+/K+ transporting subunit alpha 1	protein-coding	10.59
chr6-153	chr6	81938375	81938622	Promoter	promoter-TSS (NR_149134)	-77	NR_149134	102724168	Hs.485841	NR_149134		LINC02542	-	long intergenic non-protein coding RNA 2542	ncRNA	10.58
chr3-131	chr3	12484049	12484313	Promoter	promoter-TSS (NM_025265)	-251	NM_001145393	80746	Hs.335550	NM_025265	ENSG00000154743	TSEN2	PCH2B|SEN2|SEN2L	tRNA splicing endonuclease subunit 2	protein-coding	10.58
chr2-158	chr2	45728458	45728694	Genebody	intron (NM_005400, intron 1 of 14)	76672	NM_005400	5581	Hs.580351	NM_005400	ENSG00000171132	PRKCE	PKCE|nPKC-epsilon	protein kinase C epsilon	protein-coding	10.58
chr1-262	chr1	18952121	18952386	Genebody	intron (NM_001136265, intron 1 of 8)	4079	NM_001136265	126917	Hs.466625	NM_001136265	ENSG00000169991	IFFO2	-	intermediate filament family orphan 2	protein-coding	10.57
chr17-142	chr17	8288619	8288888	Promoter	TTS (NR_135484)	102	NM_016492	29098	Hs.408233	NM_016492	ENSG00000108961	RANGRF	HSPC165|HSPC236|MOG1|RANGNRF	RAN guanine nucleotide release factor	protein-coding	10.57
chr1-574	chr1	206631225	206631490	Intergenic	MLT1H|LTR|ERVL-MaLR	-4179	NM_003582	8444	Hs.164267	NM_003582	ENSG00000143479	DYRK3	DYRK5|RED|REDK|hYAK3-2	dual specificity tyrosine phosphorylation regulated kinase 3	protein-coding	10.57
chr5-130	chr5	119414175	119414444	Intergenic	MER11A|LTR|ERVK	-38134	NM_001292027	3295	Hs.406861	NM_000414	ENSG00000133835	HSD17B4	DBP|MFE-2|MPF-2|PRLTS1|SDR8C1	hydroxysteroid 17-beta dehydrogenase 4	protein-coding	10.57
chr6-76	chr6	127484227	127484483	Genebody	intron (NM_001012279, intron 4 of 11)	-24965	NM_014702	9729	Hs.319247	NM_014702	ENSG00000189367	KIAA0408	-	KIAA0408	protein-coding	10.57
chr14-84	chr14	23010422	23010681	Promoter	promoter-TSS (NM_001130708)	-350	NM_001130708	60686	Hs.255874	NM_021944	ENSG00000100802	C14orf93	RTFC	chromosome 14 open reading frame 93	protein-coding	10.56
chr8-71	chr8	41828456	41828698	Genebody	intron (NM_001142446, intron 1 of 42)	-30955	NM_020475	286	Hs.654438	NM_000037	ENSG00000029534	ANK1	ANK|SPH1|SPH2	ankyrin 1	protein-coding	10.56
chr8-75	chr8	42271557	42271825	Promoter	promoter-TSS (NR_125823)	389	NR_033818	3551	Hs.597664	NM_001556	ENSG00000104365	IKBKB	IKK-beta|IKK2|IKKB|IMD15|NFKBIKB	inhibitor of nuclear factor kappa B kinase subunit beta	protein-coding	10.56
chr9-91	chr9	89816017	89816278	Intergenic	MLT1G1|LTR|ERVL-MaLR	-153269	NR_109791	101927847	Hs.584312	NR_109791		LOC101927847	-	uncharacterized LOC101927847	ncRNA	10.56
chr22-66	chr22	25419405	25419674	Intergenic	Intergenic	-28548	NR_033734	1416	Hs.571835	NR_033733	ENSG00000100058	CRYBB2P1	CRYB2B	crystallin beta B2 pseudogene 1	pseudo	10.55
chr5-106	chr5	6496228	6496497	Genebody	3' UTR (NM_001145161, exon 2 of 2)	47739	NM_001145161	134111	Hs.126856	NM_001145161	ENSG00000215218	UBE2QL1	-	ubiquitin conjugating enzyme E2 Q family like 1	protein-coding	10.55
chr13-56	chr13	52851717	52851985	Intergenic	CpG	-3211	NM_002590	5100	Hs.19492	NM_002590	ENSG00000136099	PCDH8	ARCADLIN|PAPC	protocadherin 8	protein-coding	10.53
chr16-127	chr16	71845651	71845908	Promoter	promoter-TSS (NM_001137675)	-212	NM_001137675	342371	Hs.743239	NM_001137675	ENSG00000224470	ATXN1L	BOAT|BOAT1	ataxin 1 like	protein-coding	10.53
chr11-118	chr11	61964679	61964947	Genebody	TTS (NM_004183)	2847	NM_002032	2495	Hs.524910	NM_002032	ENSG00000167996	FTH1	FHC|FTH|FTHL6|HFE5|PIG15|PLIF	ferritin heavy chain 1	protein-coding	10.53
chr10-102	chr10	102917991	102918257	Promoter	promoter-TSS (NM_017649)	-194	NM_199076	54805	Hs.643509	NM_017649	ENSG00000148842	CNNM2	ACDP2|HOMG6|HOMGSMR	cyclin and CBS domain divalent metal cation transport mediator 2	protein-coding	10.53
chr9-76	chr9	109411180	109411422	Genebody	MIR3|SINE|MIR	6482	NR_026918	5774	Hs.436429	NM_002829	ENSG00000070159	PTPN3	PTP-H1|PTPH1	protein tyrosine phosphatase, non-receptor type 3	protein-coding	10.53
chr13-30	chr13	40047355	40047624	Intergenic	MIR|SINE|MIR	-134320	NR_046870	100874127	Hs.578028	NR_046870	ENSG00000230710	LINC00332	NCRNA00332	long intergenic non-protein coding RNA 332	ncRNA	10.52
chr1-337	chr1	94031264	94031531	Genebody	intron (NM_000350, intron 27 of 49)	89752	NM_000350	24	Hs.416707	NM_000350	ENSG00000198691	ABCA4	ABC10|ABCR|ARMD2|CORD3|FFM|RMP|RP19|STGD|STGD1	ATP binding cassette subfamily A member 4	protein-coding	10.52
chr15-41	chr15	74843211	74843480	Promoter	promoter-TSS (NM_001284365)	-134	NM_001284364	25989	Hs.513034	NM_001099436	ENSG00000140474	ULK3	-	unc-51 like kinase 3	protein-coding	10.52
chr3-74	chr3	120349517	120349786	Promoter	promoter-TSS (NM_001099678)	-312	NM_001099678	116064	Hs.518084	NM_001099678	ENSG00000163428	LRRC58	-	leucine rich repeat containing 58	protein-coding	10.52
chr2-133	chr2	46535345	46535611	Genebody	MLT1N2|LTR|ERVL-MaLR	7079	NM_001318063	90423	Hs.437691	NM_080653	ENSG00000250565	ATP6V1E2	ATP6E1|ATP6EL2|ATP6V1EL2|VMA4	ATPase H+ transporting V1 subunit E2	protein-coding	10.5
chr9-70	chr9	32572279	32572522	Promoter	intron (NM_002493, intron 1 of 3)	784	NM_182739	4712	Hs.493668	NM_002493	ENSG00000165264	NDUFB6	B17|CI	NADH:ubiquinone oxidoreductase subunit B6	protein-coding	10.49
chr7-122	chr7	30284171	30284440	Promoter	promoter-TSS (NM_147128)	-2	NM_147128	223082	Hs.263912	NM_147128	ENSG00000180233	ZNRF2	RNF202	zinc and ring finger 2	protein-coding	10.49
chr17-129	chr17	57355474	57355713	Genebody	intron (NM_001322250, intron 5 of 13)	98580	NM_170721	124540	Hs.658922	NM_138962	ENSG00000153944	MSI2	MSI2H	musashi RNA binding protein 2	protein-coding	10.48
chr19-153	chr19	2266528	2266774	Intergenic	Intergenic	-2835	NM_001301020	4946	Hs.446427	NM_004152	ENSG00000104904	OAZ1	AZ1|AZI|OAZ	ornithine decarboxylase antizyme 1	protein-coding	10.47
chr19-170	chr19	47277627	47277896	Intergenic	MIR|SINE|MIR	2876	NM_178511	255783	Hs.128690	NM_178511	ENSG00000257704	INAFM1	PRR24	InaF motif containing 1	protein-coding	10.46
chr8-64	chr8	128077018	128077287	Genebody	intron (NR_003367, intron 6 of 8)	28000	NR_031612	100302175		NR_031612	ENSG00000221176	MIR1207	MIRN1207|hsa-mir-1207	microRNA 1207	ncRNA	10.46
chr1-270	chr1	209827877	209828133	Promoter	promoter-TSS (NM_014388)	38	NM_014388	27042	Hs.194754	NM_014388	ENSG00000117597	UTP25	C1orf107|DEF|DIEXF|DJ434O14.5	UTP25, small subunit processor component	protein-coding	10.46
chr1-271	chr1	110286664	110286918	Genebody	non-coding (NR_036595, exon 4 of 4)	52380	NR_036595	440600	Hs.649375	NR_036595	ENSG00000227963	RBM15-AS1	AS-RBM15	RBM15 antisense RNA 1	ncRNA	10.46
chr6-256	chr6	40124999	40125265	Intergenic	Intergenic	-190581	NM_001075098	4337	Hs.357128	NM_005942	ENSG00000124615	MOCS1	MIG11|MOCOD|MOCS1A|MOCS1B	molybdenum cofactor synthesis 1	protein-coding	10.45
chr10-126	chr10	79116866	79117125	Genebody	MLT1H2|LTR|ERVL-MaLR	47960	NM_020338	57178	Hs.193118	NM_020338	ENSG00000108175	ZMIZ1	MIZ|RAI17|TRAFIP10|ZIMP10	zinc finger MIZ-type containing 1	protein-coding	10.45
chr7-124	chr7	101165522	101165779	Promoter	promoter-TSS (NM_003378)	-79	NM_003378	7425	Hs.587325	NM_003378	ENSG00000128564	VGF	SCG7|SgVII	VGF nerve growth factor inducible	protein-coding	10.45
chrY-25	chrY	1391605	1391871	Promoter	CpG	408	NM_001636	293	Hs.350927	NM_001636	ENSG00000169100	SLC25A6	AAC3|ANT|ANT 2|ANT 3|ANT3|ANT3Y	solute carrier family 25 member 6	protein-coding	10.45
chr7-79	chr7	155206397	155206661	Intergenic	MLT1B|LTR|ERVL-MaLR	-91243	NM_005542	3638	Hs.520819	NM_005542	ENSG00000186480	INSIG1	CL6	insulin induced gene 1	protein-coding	10.44
chr5-171	chr5	75571620	75571889	Genebody	MLT1G1|LTR|ERVL-MaLR	-39722	NM_001276713	728780	Hs.370455	NM_001271529	ENSG00000189045	ANKDD1B	-	ankyrin repeat and death domain containing 1B	protein-coding	10.44
chr2-145	chr2	173354580	173354836	Promoter	promoter-TSS (NM_145810)	-125	NM_145810	83879	Hs.470654	NM_031942	ENSG00000144354	CDCA7	ICF3|JPO1	cell division cycle associated 7	protein-coding	10.43
chr9-81	chr9	33473789	33474035	Promoter	promoter-TSS (NM_022917)	31	NM_139235	65083	Hs.493709	NM_022917	ENSG00000165271	NOL6	NRAP|UTP22|bA311H10.1	nucleolar protein 6	protein-coding	10.42
chr11-90	chr11	66135884	66136148	Genebody	intron (NM_018026, intron 1 of 23)	65663	NM_018026	55690	Hs.644326	NM_018026	ENSG00000175115	PACS1	MRD17|SHMS	phosphofurin acidic cluster sorting protein 1	protein-coding	10.42
chr9-102	chr9	93071594	93071856	Genebody	MLT1J|LTR|ERVL-MaLR	13037	NM_145006	203328	Hs.88417	NM_145006	ENSG00000157303	SUSD3	-	sushi domain containing 3	protein-coding	10.41
chr3-109	chr3	39151526	39151786	Promoter	intron (NM_001320560, intron 1 of 4)	1955	NM_033027	64651	Hs.370950	NM_033027	ENSG00000144655	CSRNP1	AXUD1|CSRNP-1|FAM130B|TAIP-3|URAX1	cysteine and serine rich nuclear protein 1	protein-coding	10.41
chr9-97	chr9	1018243	1018505	Intergenic	Intergenic	-29769	NR_110643	102800446	Hs.171043	NR_110643		LINC01230	TCONS_00015639|linc-DMRT2|lnc-DRMT2	long intergenic non-protein coding RNA 1230	ncRNA	10.39
chr19-156	chr19	50460196	50460465	Genebody	intron (NM_004533, intron 24 of 27)	-16147	NM_206538	284361	Hs.448941	NM_175063	ENSG00000161671	EMC10	C19orf63|HSM1|HSS1	ER membrane protein complex subunit 10	protein-coding	10.38
chr1-241	chr1	24642853	24643122	Promoter	promoter-TSS (NM_001303449)	-116	NM_001303448	10250	Hs.18192	NM_005839	ENSG00000133226	SRRM1	160-KD|POP101|SRM160	serine and arginine repetitive matrix 1	protein-coding	10.38
chr15-44	chr15	68829013	68829271	Intergenic	MLT1J2|LTR|ERVL-MaLR	-8220	NM_006305	8125	Hs.458747	NM_006305	ENSG00000140350	ANP32A	C15orf1|HPPCn|I1PP2A|LANP|MAPM|PHAP1|PHAPI|PP32	acidic nuclear phosphoprotein 32 family member A	protein-coding	10.38
chr19-134	chr19	2151712	2151904	Promoter	promoter-TSS (NM_001261826)	-182	NM_003938	8943	Hs.512815	NM_003938	ENSG00000065000	AP3D1	ADTD|HPS10|hBLVR	adaptor related protein complex 3 subunit delta 1	protein-coding	10.38
chr6-86	chr6	158816467	158816721	Promoter	intron (NM_001111077, intron 2 of 13)	-1385	NR_102425	101409257	Hs.571207	NR_102425		EZR-AS1	-	EZR antisense RNA 1	ncRNA	10.37
chr2-135	chr2	201233321	201233587	Promoter	promoter-TSS (NM_033355)	11	NM_033358	841	Hs.599762	NM_001228	ENSG00000064012	CASP8	ALPS2B|CAP4|Casp-8|FLICE|MACH|MCH5	caspase 8	protein-coding	10.37
chr1-220	chr1	226680025	226680294	Genebody	intron (NM_002221, intron 2 of 7)	-5091	NR_103784	100506443	Hs.664293	NR_103784		ITPKB-IT1	-	ITPKB intronic transcript 1	ncRNA	10.36
chr19-148	chr19	45927732	45928001	Intergenic	LTR67B|LTR|ERVL	-13088	NM_001029861	339345	Hs.434218	NM_001029861	ENSG00000188425	NANOS2	NOS2|ZC2HC12B	nanos C2HC-type zinc finger 2	protein-coding	10.36
chr10-132	chr10	1465562	1465831	Genebody	LTR43|LTR|ERV1	-60934	NR_033387	642394	Hs.568831	NM_001098830	ENSG00000205696	ADARB2-AS1	C10orf109|NCRNA00168	ADARB2 antisense RNA 1	ncRNA	10.36
chr17-189	chr17	4365135	4365395	Promoter	intron (NM_003342, intron 1 of 5)	1409	NM_003342	7326	Hs.741319	NM_003342	ENSG00000132388	UBE2G1	E217K|UBC7|UBE2G	ubiquitin conjugating enzyme E2 G1	protein-coding	10.35
chr8-82	chr8	102662983	102663246	Intergenic	MLT1G1|LTR|ERVL-MaLR	-7212	NM_005655	7071	Hs.435001	NM_005655	ENSG00000155090	KLF10	EGR-alpha|EGRA|TIEG|TIEG1	Kruppel like factor 10	protein-coding	10.35
chr19-298	chr19	7006406	7006653	Promoter	promoter-TSS (NR_024372)	-114	NR_024372	497049	Hs.367930	NM_001011541		FLJ25758	-	microtubule affinity regulating kinase 1 pseudogene	pseudo	10.34
chr8-99	chr8	53654137	53654375	Intergenic	Charlie1a|DNA|hAT-Charlie	-130291	NR_149032	100507516	Hs.597483	NR_149032		LOC100507516	-	uncharacterized LOC100507516	ncRNA	10.34
chr17-121	chr17	59106666	59106930	Promoter	non-coding (NR_148347, exon 1 of 23)	166	NM_015294	4591	Hs.579079	NM_015294	ENSG00000108395	TRIM37	MUL|POB1|TEF3	tripartite motif containing 37	protein-coding	10.33
chr19-144	chr19	41535011	41535278	Promoter	promoter-TSS (NR_110724)	-354	NR_110724	101927931	Hs.158951	NR_110724	ENSG00000270164	LINC01480	-	long intergenic non-protein coding RNA 1480	ncRNA	10.33
chr7-75	chr7	100429204	100429459	Promoter	promoter-TSS (NM_017984)	-300	NM_019606	56257	Hs.178011	NM_019606	ENSG00000146834	MEPCE	BCDIN3	methylphosphate capping enzyme	protein-coding	10.3
chr22-53	chr22	50105757	50106026	Genebody	intron (NM_001164105, intron 3 of 25)	15635	NM_001164105	54456	Hs.62880	NM_018995	ENSG00000073146	MOV10L1	CHAMP|DJ402G11.8	Mov10 RISC complex RNA helicase like 1	protein-coding	10.3
chr2-186	chr2	25376638	25376880	Genebody	TTS (NM_033147)	-34169	NM_175629	1788	Hs.515840	NM_022552	ENSG00000119772	DNMT3A	DNMT3A2|M.HsaIIIA|TBRS	DNA methyltransferase 3 alpha	protein-coding	10.29
chr12-91	chr12	62260976	62261239	Promoter	TTS (NR_106740)	748	NR_106740	102465133		NR_106740	ENSG00000284360	MIR6125	hsa-mir-6125|mir-6125	microRNA 6125	ncRNA	10.29
chr1-277	chr1	36464350	36464578	Promoter	promoter-TSS (NM_031280)	-25	NM_031280	64960	Hs.352839	NM_031280	ENSG00000116898	MRPS15	DC37|MPR-S15|RPMS15|S15mt	mitochondrial ribosomal protein S15	protein-coding	10.29
chr5-161	chr5	1799784	1800053	Promoter	promoter-TSS (NM_032479)	-76	NM_032479	64979	Hs.719465	NM_032479	ENSG00000171421	MRPL36	BRIP1|L36mt|MRP-L36|PRPL36|RPMJ	mitochondrial ribosomal protein L36	protein-coding	10.28
chr1-266	chr1	37595760	37596029	Promoter	promoter-TSS (NM_001323624)	91	NM_001323624	29889	Hs.75528	NM_013285	ENSG00000134697	GNL2	HUMAUANTIG|NGP1|Ngp-1|Nog2|Nug2	G protein nucleolar 2	protein-coding	10.28
chr17-198	chr17	77145179	77145404	Genebody	L1ME2|LINE|L1	4368	NM_001039573	6397	Hs.464184	NM_003003	ENSG00000129657	SEC14L1	PRELID4A|SEC14L	SEC14 like lipid binding 1	protein-coding	10.27
chr1-302	chr1	113874679	113874945	Genebody	intron (NR_037864, intron 3 of 4)	-3053	NM_001308297	26191	Hs.535276	NM_012411	ENSG00000134242	PTPN22	LYP|LYP1|LYP2|PEP|PTPN22.5|PTPN22.6|PTPN8	protein tyrosine phosphatase, non-receptor type 22	protein-coding	10.26
chr17-173	chr17	58332380	58332648	Promoter	intron (NR_038413, intron 1 of 3)	-1196	NR_029683	406934		NR_029683	ENSG00000284353	MIR142	MIRN142|mir-142	microRNA 142	ncRNA	10.26
chr21-75	chr21	17848378	17848647	Genebody	MLT1H|LTR|ERVL-MaLR	-29126	NM_017447	54149	Hs.293811	NM_017447	ENSG00000154642	C21orf91	C21orf14|C21orf38|CSSG1|EURL|YG81	chromosome 21 open reading frame 91	protein-coding	10.25
chr2-155	chr2	223836014	223836277	Promoter	intron (NR_110906, intron 1 of 3)	1457	NR_110906	130340	Hs.632555	NM_178814	ENSG00000152056	AP1S3	PSORS15	adaptor related protein complex 1 subunit sigma 3	protein-coding	10.24
chr11-82	chr11	68412957	68413222	Genebody	intron (NM_002335, intron 11 of 22)	-47629	NM_001352368	55291	Hs.503022	NM_018312	ENSG00000110075	PPP6R3	C11orf23|PP6R3|SAP190|SAPL|SAPLa|SAPS3	protein phosphatase 6 regulatory subunit 3	protein-coding	10.24
chr19-332	chr19	17264708	17264960	Promoter	promoter-TSS (NM_001297703)	-38	NR_135632	83878	Hs.512773	NM_031941	ENSG00000130307	USHBP1	AIEBP|MCC2	USH1 protein network component harmonin binding protein 1	protein-coding	10.23
chr11-111	chr11	126268911	126269153	Promoter	promoter-TSS (NR_037647)	-8	NR_037647	55572	Hs.317190	NM_017547	ENSG00000110074	FOXRED1	FP634|H17	FAD dependent oxidoreductase domain containing 1	protein-coding	10.23
chr9-172	chr9	109972645	109972895	Genebody	intron (NM_147150, intron 6 of 9)	-75828	NM_001198656	11217	Hs.591908	NM_001004065	ENSG00000241978	AKAP2	AKAP-2|AKAPKL|MISP2|PRKA2	A-kinase anchoring protein 2	protein-coding	10.22
chr14-60	chr14	34982570	34982837	Promoter	promoter-TSS (NM_003136)	-137	NR_151701	100506157		NR_151701		SRP54-AS1	-	SRP54 antisense RNA 1 (head to head)	ncRNA	10.22
chr4-88	chr4	53365967	53366222	Promoter	promoter-TSS (NM_152540)	-19	NM_152540	152579	Hs.302287	NM_152540	ENSG00000184178	SCFD2	STXBP1L1	sec1 family domain containing 2	protein-coding	10.22
chr17-181	chr17	4966280	4966549	Promoter	MIR|SINE|MIR	1423	NM_004890	9552	Hs.90436	NM_004890	ENSG00000091640	SPAG7	ACRP|FSA-1	sperm associated antigen 7	protein-coding	10.2
chr1-254	chr1	40097096	40097365	Promoter	exon (NM_001142604, exon 1 of 6)	240	NM_000310	5538	Hs.3873	NM_000310	ENSG00000131238	PPT1	CLN1|INCL|PPT	palmitoyl-protein thioesterase 1	protein-coding	10.2
chr19-112	chr19	35509229	35509498	Promoter	intron (NM_001126056, intron 6 of 17)	1147	NR_033746	93099	Hs.417795	NM_033317	ENSG00000161249	DMKN	UNQ729|ZD52F10	dermokine	protein-coding	10.2
chr6-88	chr6	63636711	63636980	Promoter	intron (NM_001290260, intron 1 of 3)	364	NM_001290260	23469	Hs.348921	NM_015153	ENSG00000118482	PHF3	-	PHD finger protein 3	protein-coding	10.2
chr20-63	chr20	63956534	63956803	Promoter	promoter-TSS (NM_017859)	-221	NR_148438	54963	Hs.504998	NM_017859	ENSG00000198276	UCKL1	UCK1L|URKL1	uridine-cytidine kinase 1 like 1	protein-coding	10.2
chr19-176	chr19	4815648	4815907	Genebody	TTS (NM_182919)	15965	NM_182919	148022	Hs.29344	NM_014261	ENSG00000127666	TICAM1	IIAE6|MyD88-3|PRVTIRB|TICAM-1|TRIF	toll like receptor adaptor molecule 1	protein-coding	10.2
chr6-132	chr6	73653120	73653385	Promoter	intron (NM_012434, intron 1 of 10)	762	NM_012434	26503	Hs.597422	NM_012434	ENSG00000119899	SLC17A5	AST|ISSD|NSD|SD|SIALIN|SIASD|SLD	solute carrier family 17 member 5	protein-coding	10.19
chr22-51	chr22	18056805	18057066	Intergenic	Intergenic	-20985	NM_017929	55670	Hs.517400	NM_017929	ENSG00000215193	PEX26	PBD7A|PBD7B|PEX26M1T|Pex26pM1T	peroxisomal biogenesis factor 26	protein-coding	10.18
chr2-124	chr2	197293820	197294076	Genebody	intron (NR_046837, intron 5 of 5)	8571	NR_046837	101927547	Hs.687027	NR_046837	ENSG00000236977	ANKRD44-IT1	-	ANKRD44 intronic transcript 1	ncRNA	10.18
chr13-68	chr13	52324828	52325045	Intergenic	L1MA4A|LINE|L1	-9359	NR_120400	103191607		NR_120400	ENSG00000271564	LINC02333	-	long intergenic non-protein coding RNA 2333	ncRNA	10.18
chr14-64	chr14	91323905	91324156	Genebody	intron (NM_001080414, intron 12 of 29)	-70150	NM_001348437	8111	Hs.8882	NM_003485	ENSG00000119714	GPR68	AI2A6|GPR12A|OGR1	G protein-coupled receptor 68	protein-coding	10.18
chr18-33	chr18	2972336	2972605	Genebody	intron (NM_014646, intron 1 of 19)	-25847	NR_026659	727896	Hs.673126	NR_026659		LOC727896	-	cysteine and histidine rich domain containing 1 pseudogene	pseudo	10.17
chr4-137	chr4	33512521	33512763	Intergenic	MER57B2|LTR|ERV1	527251	NR_125902	101928622	Hs.631687	NR_125902	ENSG00000250954	LOC101928622	-	uncharacterized LOC101928622	ncRNA	10.17
chr12-123	chr12	49130139	49130408	Promoter	intron (NM_006082, intron 1 of 3)	1248	NM_006082	10376	Hs.524390	NM_006082	ENSG00000123416	TUBA1B	K-ALPHA-1	tubulin alpha 1b	protein-coding	10.17
chr9-64	chr9	89463912	89464175	Genebody	intron (NM_006378, intron 1 of 17)	15653	NM_001142287	10507	Hs.494406	NM_006378	ENSG00000187764	SEMA4D	C9orf164|CD100|COLL4|M-sema-G|SEMAJ|coll-4	semaphorin 4D	protein-coding	10.15
chr20-69	chr20	63850888	63851147	Intergenic	Intergenic	-10196	NM_080622	140701	Hs.266774	NM_080622	ENSG00000183260	ABHD16B	C20orf135|dJ591C20.1	abhydrolase domain containing 16B	protein-coding	10.14
chr13-26	chr13	49585428	49585687	Promoter	promoter-TSS (NM_001352506)	26	NM_001352502	55213	Hs.508021	NM_018191	ENSG00000136144	RCBTB1	CLLD7|CLLL7|GLP|RDEOA	RCC1 and BTB domain containing protein 1	protein-coding	10.12
chr17-92	chr17	40099102	40099371	Promoter	CpG	1489	NM_021724	9572	Hs.724	NM_021724	ENSG00000126368	NR1D1	EAR1|REVERBA|REVERBalpha|THRA1|THRAL|ear-1|hRev	nuclear receptor subfamily 1 group D member 1	protein-coding	10.12
chr8-48	chr8	134832353	134832622	Intergenic	CpG	-5582	NR_126028	552853	Hs.575612	NR_126028	ENSG00000253433	NCRNA00250	C8orf24	non-protein coding RNA 250	ncRNA	10.12
chr13-34	chr13	49792731	49792976	Promoter	promoter-TSS (NM_002267)	68	NM_002267	3839	Hs.527919	NM_002267	ENSG00000102753	KPNA3	IPOA4|SRP1|SRP1gamma|SRP4|hSRP1	karyopherin subunit alpha 3	protein-coding	10.11
chr6-74	chr6	135087936	135088199	Intergenic	Intergenic	-33169	NM_001145158	10767	Hs.378532	NM_006620	ENSG00000112339	HBS1L	EF-1a|ERFS|HBS1|HSPC276|eRF3c	HBS1 like translational GTPase	protein-coding	10.1
chr12-205	chr12	85301104	85301372	Genebody	exon (NM_006982, exon 4 of 4)	20980	NM_006982	8092	Hs.41683	NM_006982	ENSG00000180318	ALX1	CART1|FND3|HEL23	ALX homeobox 1	protein-coding	10.1
chr1-204	chr1	92474224	92474482	Genebody	3' UTR (NM_001127215, exon 7 of 7)	9601	NM_001127215	2672	Hs.73172	NM_005263	ENSG00000162676	GFI1	GFI-1|GFI1A|SCN2|ZNF163	growth factor independent 1 transcriptional repressor	protein-coding	10.1
chr6-89	chr6	42771092	42771361	Genebody	intron (NM_001318819, intron 1 of 13)	-12270	NR_134654	401261	Hs.656652	NM_001004322		LOC401261	-	uncharacterized LOC401261	ncRNA	10.09
chr22-50	chr22	40856641	40856885	Promoter	promoter-TSS (NM_022098)	245	NM_001278589	6767	Hs.712713	NM_003932	ENSG00000100380	ST13	AAG2|FAM10A1|FAM10A4|HIP|HOP|HSPABP|HSPABP1|P48|PRO0786|SNC6	ST13, Hsp70 interacting protein	protein-coding	10.09
chr17-137	chr17	73092564	73092833	Promoter	promoter-TSS (NM_139177)	16	NM_139177	201266	Hs.221127	NM_139177	ENSG00000133195	SLC39A11	C17orf26|ZIP-11|ZIP11	solute carrier family 39 member 11	protein-coding	10.09
chr12-102	chr12	71839663	71839885	Promoter	promoter-TSS (NR_027449)	67	NM_001146213	64786	Hs.284630	NM_022771	ENSG00000121749	TBC1D15	RAB7-GAP	TBC1 domain family member 15	protein-coding	10.08
chr2-196	chr2	196101452	196101670	Intergenic	Intergenic	-32749	NM_018897	56171	Hs.97403	NM_018897	ENSG00000118997	DNAH7	-	dynein axonemal heavy chain 7	protein-coding	10.07
chr13-45	chr13	110471137	110471403	Genebody	intron (NM_001846, intron 28 of 47)	-7983	NM_001267044	100129836	Hs.640035	NM_001267044		COL4A2-AS2	-	COL4A2 antisense 2	protein-coding	10.07
chr2-194	chr2	3303612	3303878	Genebody	intron (NM_001330530, intron 3 of 9)	74187	NM_001330531	7260	Hs.502770	NM_003310	ENSG00000032389	EIPR1	EIPR-1|TSSC1	EARP complex and GARP complex interacting protein 1	protein-coding	10.07
chr12-155	chr12	31100890	31101152	Genebody	intron (NM_152438, intron 19 of 26)	-27174	NR_038927	100506660	Hs.586774	NR_038927	ENSG00000245614	DDX11-AS1	CONCR	DDX11 antisense RNA 1	ncRNA	10.06
chr4-82	chr4	153467287	153467556	Promoter	CpG-21575	1075	NM_015196	23240	Hs.732450	NM_015196	ENSG00000121210	TMEM131L	KIAA0922	transmembrane 131 like	protein-coding	10.06
chr1-334	chr1	32848467	32848721	Genebody	intron (NR_135107, intron 5 of 6)	22219	NM_153756	252995	Hs.524234	NM_153756	ENSG00000160097	FNDC5	FRCP2|irisin	fibronectin type III domain containing 5	protein-coding	10.06
chr1-643	chr1	53399767	53400014	Intergenic	LTR13A|LTR|ERVK	40130	NR_002314	163742	Hs.99394	NR_002314	ENSG00000236253	SLC25A3P1	-	solute carrier family 25 member 3 pseudogene 1	pseudo	10.05
chr9-96	chr9	120892578	120892846	Genebody	L4_A_Mam|LINE|RTE-X	2184	NM_001286840	26147	Hs.460124	NM_015651	ENSG00000119403	PHF19	MTF2L1|PCL3|TDRD19B	PHD finger protein 19	protein-coding	10.05
chr5-110	chr5	126972373	126972615	Genebody	intron (NM_178450, intron 1 of 4)	58314	NM_178450	115123	Hs.132441	NM_178450	ENSG00000173926	MARCH3	MARCH-III|RNF173	membrane associated ring-CH-type finger 3	protein-coding	10.05
chr2-177	chr2	55010161	55010388	Promoter	promoter-TSS (NM_007008)	60	NM_007008	57142	Hs.637850	NM_007008	ENSG00000115310	RTN4	ASY|NI220/250|NOGO|NSP|NSP-CL|Nbla00271|Nbla10545|RTN-X|RTN4-A|RTN4-B1|RTN4-B2|RTN4-C	reticulon 4	protein-coding	10.05
chr4-84	chr4	87073865	87074123	Genebody	(GT)n|Simple_repeat|Simple_repeat	66993	NM_005935	4299	Hs.480190	NM_005935	ENSG00000172493	AFF1	AF4|MLLT2|PBM1	AF4/FMR2 family member 1	protein-coding	10.04
chr1-351	chr1	222464859	222465128	Intergenic	Intergenic	83109	NM_024746	79802	Hs.665660	NM_024746	ENSG00000143512	HHIPL2	KIAA1822L	HHIP like 2	protein-coding	10.04
chr8-96	chr8	123447833	123448102	Genebody	MLT1J1|LTR|ERVL-MaLR	31242	NM_001283024	55093	Hs.18029	NM_018024	ENSG00000156795	WDYHV1	C8orf32	WDYHV motif containing 1	protein-coding	10.04
chr8-133	chr8	15638948	15639217	Genebody	intron (NM_178234, intron 2 of 9)	98995	NM_006765	7991	Hs.426324	NM_006765	ENSG00000104723	TUSC3	D8S1992|M33|MRT22|MRT7|MagT2|N33|OST3A	tumor suppressor candidate 3	protein-coding	10.01
chr2-169	chr2	110500020	110500286	Intergenic	Intergenic	-27078	NR_027145	100271835	Hs.535619	NR_027144	ENSG00000284337	LIMS3-LOC440895	-	LIMS3-LOC440895 readthrough	ncRNA	10.01
chr2-181	chr2	160269756	160270025	Genebody	CpG	2005	NR_103775	100505984	Hs.729532	NR_103775	ENSG00000285373	LINC02478	-	long intergenic non-protein coding RNA 2478	ncRNA	10.01
chr15-156	chr15	100703021	100703286	Intergenic	MLT1I|LTR|ERVL-MaLR	100603	NM_024708	140460	Hs.31845	NM_024708	ENSG00000183475	ASB7	-	ankyrin repeat and SOCS box containing 7	protein-coding	10
chr8-59	chr8	143404920	143405182	Intergenic	Intergenic	-12628	NR_126358	104326051	Hs.202140	NR_126358	ENSG00000254338	MAFA-AS1	TCONS_00014882	MAFA antisense RNA 1	ncRNA	10
chr5-85	chr5	116899027	116899274	Intergenic	MIR|SINE|MIR	-136941	NR_104678	102467223	Hs.570916	NR_104678		LINC02214	-	long intergenic non-protein coding RNA 2214	ncRNA	9.99
chr17-160	chr17	72420025	72420293	Genebody	MIRc|SINE|MIR	77348	NR_135222	146795	Hs.651743	NR_135222	ENSG00000264026	LINC02003	-	long intergenic non-protein coding RNA 2003	ncRNA	9.99
chr7-121	chr7	139095217	139095480	Genebody	intron (NM_020119, intron 1 of 12)	14371	NM_024625	56829	Hs.133512	NM_020119	ENSG00000105939	ZC3HAV1	ARTD13|FLB6421|PARP13|ZAP|ZC3H2|ZC3HDC2	zinc finger CCCH-type containing, antiviral 1	protein-coding	9.99
chr6-64	chr6	123770402	123770671	Intergenic	LTR8B|LTR|ERV1	-33310	NM_001300737	154215	Hs.656604	NM_153355	ENSG00000188580	NKAIN2	FAM77B|NKAIP2|TCBA|TCBA1	sodium/potassium transporting ATPase interacting 2	protein-coding	9.98
chr6-81	chr6	87742137	87742406	Intergenic	MLT1F1|LTR|ERVL-MaLR	-40004	NM_018064	55122	Hs.485915	NM_018064	ENSG00000135334	AKIRIN2	C6orf166|FBI1|dJ486L4.2	akirin 2	protein-coding	9.98
chr22-75	chr22	36913396	36913657	Promoter	promoter-TSS (NM_000395)	-107	NM_000395	1439	Hs.592192	NM_000395	ENSG00000100368	CSF2RB	CD131|CDw131|IL3RB|IL5RB|SMDP5|betaGMR	colony stimulating factor 2 receptor beta common subunit	protein-coding	9.98
chr11-79	chr11	128965477	128965744	Genebody	3' UTR (NM_001142685, exon 22 of 22)	-22211	NM_001251964	63970	Hs.160953	NM_022112	ENSG00000120471	TP53AIP1	P53AIP1	tumor protein p53 regulated apoptosis inducing protein 1	protein-coding	9.98
chr2-168	chr2	14306293	14306554	Genebody	AluSx1|SINE|Alu	94535	NR_103814	100499171	Hs.565606	NR_103814	ENSG00000230448	LINC00276	NCRNA00276	long intergenic non-protein coding RNA 276	ncRNA	9.98
chr19-164	chr19	4759810	4760079	Intergenic	CpG	-9161	NR_027148	284424	Hs.326728	NM_174947	ENSG00000176840	MIR7-3HG	C19orf30|Huh7|LINC00306|NCRNA00306|PGSF1|uc002mbe.2	MIR7-3 host gene	ncRNA	9.98
chr15-88	chr15	96038749	96039016	Intergenic	Intergenic	-287046	NM_001145155	7026	Hs.347991	NM_021005	ENSG00000185551	NR2F2	ARP1|CHTD4|COUPTF2|COUPTFB|COUPTFII|NF-E3|NR2F1|SVP40|TFCOUP2	nuclear receptor subfamily 2 group F member 2	protein-coding	9.98
chr10-105	chr10	1489198	1489467	Genebody	intron (NM_018702, intron 1 of 9)	-37298	NR_033387	642394	Hs.568831	NM_001098830	ENSG00000205696	ADARB2-AS1	C10orf109|NCRNA00168	ADARB2 antisense RNA 1	ncRNA	9.98
chr21-101	chr21	46368953	46369222	Genebody	intron (NM_006031, intron 15 of 46)	44199	NM_001315529	5116	Hs.474069	NM_006031	ENSG00000160299	PCNT	KEN|MOPD2|PCN|PCNT2|PCNTB|PCTN2|SCKL4	pericentrin	protein-coding	9.98
chr7-98	chr7	117017049	117017314	Genebody	L2a|LINE|L2	-3030	NR_106748	102466616		NR_106748	ENSG00000283923	MIR6132	hsa-mir-6132	microRNA 6132	ncRNA	9.97
chr12-111	chr12	57905287	57905541	Intergenic	Intergenic	-8932	NR_148947	283387	Hs.727244	NR_148947	ENSG00000245651	LOC283387	-	uncharacterized LOC283387	ncRNA	9.97
chr7-129	chr7	23242438	23242692	Intergenic	Intergenic	-4132	NM_001005340	10457	Hs.190495	NM_002510	ENSG00000136235	GPNMB	HGFIN|NMB|PLCA3	glycoprotein nmb	protein-coding	9.97
chr7-102	chr7	117564132	117564395	Promoter	intron (NR_149084, intron 1 of 2)	413	NR_149084	111082987	Hs.583149	NR_149084	ENSG00000232661	CFTR-AS1	BGas	CFTR antisense RNA 1	ncRNA	9.96
chr19-110	chr19	45406456	45406677	Promoter	promoter-TSS (NM_001142502)	-217	NM_001142502	10848	Hs.466937	NM_006663	ENSG00000104881	PPP1R13L	IASPP|NKIP1|RAI|RAI4	protein phosphatase 1 regulatory subunit 13 like	protein-coding	9.96
chr11-69	chr11	47214635	47214898	Promoter	promoter-TSS (NM_001300734)	-176	NM_001300734	1643	Hs.700338	NM_000107	ENSG00000134574	DDB2	DDBB|UV-DDB2|XPE	damage specific DNA binding protein 2	protein-coding	9.96
chr10-186	chr10	96289316	96289553	Intergenic	Intergenic	-14894	NM_004088	1791	Hs.534206	NM_004088	ENSG00000107447	DNTT	TDT	DNA nucleotidylexotransferase	protein-coding	9.96
chr15-76	chr15	70460032	70460280	Intergenic	Intergenic	45772	NR_146562	105370880		NR_146562	ENSG00000259473	LINC02205	-	long intergenic non-protein coding RNA 2205	ncRNA	9.95
chr1-269	chr1	181485924	181486191	Genebody	CpG	2507	NM_001205293	777	Hs.437444	NM_000721	ENSG00000198216	CACNA1E	BII|CACH6|CACNL1A6|Cav2.3|gm139	calcium voltage-gated channel subunit alpha1 E	protein-coding	9.95
chr9-105	chr9	120897325	120897594	Intergenic	Intergenic	-2563	NM_001286840	26147	Hs.460124	NM_015651	ENSG00000119403	PHF19	MTF2L1|PCL3|TDRD19B	PHD finger protein 19	protein-coding	9.95
chr4-120	chr4	78775757	78776021	Promoter	promoter-TSS (NM_198892)	-489	NM_198892	55589	Hs.146551	NM_017593	ENSG00000138756	BMP2K	BIKE|HRIHFB2017	BMP2 inducible kinase	protein-coding	9.95
chr4-111	chr4	40200294	40200516	Genebody	MER5B|DNA|hAT-Charlie	3498	NM_001278363	399	Hs.654594	NM_004310	ENSG00000168421	RHOH	ARHH|TTF	ras homolog family member H	protein-coding	9.95
chr17-127	chr17	78748828	78749096	Genebody	intron (NM_004762, intron 1 of 12)	-25212	NM_001292018	9267	Hs.191215	NM_004762	ENSG00000108669	CYTH1	B2-1|CYTOHESIN-1|D17S811E|PSCD1|SEC7	cytohesin 1	protein-coding	9.94
chr11-84	chr11	57741291	57741559	Promoter	TTS (NM_001144012)	175	NM_001321335	280636	Hs.655373	NM_170746	ENSG00000211450	SELENOH	C11orf31|C17orf10|SELH	selenoprotein H	protein-coding	9.94
chr10-137	chr10	77243198	77243451	Genebody	intron (NM_001322838, intron 3 of 29)	102493	NR_120654	101929310	Hs.666457	NR_120654	ENSG00000225497	KCNMA1-AS2	-	KCNMA1 antisense RNA 2	ncRNA	9.93
chr19-165	chr19	12937396	12937665	Promoter	Intergenic	-1070	NM_004343	811	Hs.515162	NM_004343	ENSG00000179218	CALR	CRT|HEL-S-99n|RO|SSA|cC1qR	calreticulin	protein-coding	9.93
chr1-298	chr1	234700235	234700504	Intergenic	Intergenic	-23673	NR_038856	100506810	Hs.586634	NR_038856	ENSG00000227630	LINC01132	-	long intergenic non-protein coding RNA 1132	ncRNA	9.93
chr16-97	chr16	25014092	25014361	Promoter	intron (NM_001006634, intron 1 of 19)	1152	NM_001006634	55114	Hs.373793	NM_018054	ENSG00000140750	ARHGAP17	MST066|MST110|MSTP038|MSTP066|MSTP110|NADRIN|PP367|PP4534|RICH-1|RICH1|WBP15	Rho GTPase activating protein 17	protein-coding	9.93
chr4-176	chr4	118284158	118284420	Genebody	MER20|DNA|hAT-Charlie	5099	NR_002963	677809	Hs.744742	NR_002963	ENSG00000275994	SNORA24	ACA24|SNORA24A	small nucleolar RNA, H/ACA box 24	snoRNA	9.92
chr11-116	chr11	109984902	109985127	Intergenic	Intergenic	-108347	NM_033390	85463	Hs.376289	NM_033390	ENSG00000149289	ZC3H12C	MCPIP3	zinc finger CCCH-type containing 12C	protein-coding	9.91
chr6-156	chr6	166586819	166587088	Genebody	MLT1J2|LTR|ERVL-MaLR	40324	NM_021135	6196	Hs.655277	NM_021135	ENSG00000071242	RPS6KA2	HU-2|MAPKAPK1C|RSK|RSK3|S6K-alpha|S6K-alpha2|p90-RSK3|p90RSK2|pp90RSK3	ribosomal protein S6 kinase A2	protein-coding	9.9
chr5-114	chr5	124747312	124747581	Intergenic	Intergenic	-2334	NM_020747	57507	Hs.266616	NM_020747	ENSG00000168916	ZNF608	NY-REN-36	zinc finger protein 608	protein-coding	9.9
chr17-153	chr17	10152035	10152286	Genebody	intron (NM_201433, intron 1 of 13)	46391	NM_201433	8522	Hs.462214	NM_003644	ENSG00000007237	GAS7	-	growth arrest specific 7	protein-coding	9.89
chr5-113	chr5	116671177	116671446	Intergenic	Intergenic	90898	NR_104678	102467223	Hs.570916	NR_104678		LINC02214	-	long intergenic non-protein coding RNA 2214	ncRNA	9.87
chr7-96	chr7	48088782	48089046	Promoter	promoter-TSS (NR_109837)	-226	NM_001287429	7378	Hs.488240	NM_003364	ENSG00000183696	UPP1	UDRPASE|UP|UPASE|UPP	uridine phosphorylase 1	protein-coding	9.87
chr10-152	chr10	68333493	68333762	Promoter	promoter-TSS (NM_022129)	-700	NM_001033083	64081	Hs.198158	NM_022129	ENSG00000108187	PBLD	HEL-S-306|MAWBP|MAWDBP	phenazine biosynthesis like protein domain containing	protein-coding	9.87
chr22-71	chr22	38985181	38985448	Genebody	AluSp|SINE|Alu	2915	NM_004900	9582	Hs.226307	NM_004900	ENSG00000179750	APOBEC3B	A3B|APOBEC1L|ARCD3|ARP4|DJ742C19.2|PHRBNL|bK150C2.2	apolipoprotein B mRNA editing enzyme catalytic subunit 3B	protein-coding	9.87
chr1-318	chr1	107777444	107777713	Genebody	intron (NM_006113, intron 3 of 26)	-89074	NM_001079874	10451	Hs.267659	NM_006113	ENSG00000134215	VAV3	-	vav guanine nucleotide exchange factor 3	protein-coding	9.87
chr12-95	chr12	56119451	56119719	Promoter	intron (NM_001303125, intron 2 of 2)	1025	NM_001303125	84872	Hs.632706	NM_032786	ENSG00000135482	ZC3H10	ZC3HDC10	zinc finger CCCH-type containing 10	protein-coding	9.86
chr20-68	chr20	16573542	16573799	Promoter	promoter-TSS (NM_001199866)	-236	NM_001199866	55614	Hs.101774	NM_024704	ENSG00000089177	KIF16B	C20orf23|KISC20ORF|SNX23	kinesin family member 16B	protein-coding	9.86
chr4-103	chr4	87422566	87422831	Promoter	5' UTR (NM_001248011, exon 1 of 7)	101	NM_198038	53343	Hs.149500	NM_024047	ENSG00000170502	NUDT9	NUDT10	nudix hydrolase 9	protein-coding	9.86
chr17-123	chr17	2489345	2489610	Genebody	AluSx|SINE|Alu	22429	NM_024086	79066	Hs.632237	NM_024086	ENSG00000127804	METTL16	METT10D	methyltransferase like 16	protein-coding	9.86
chr19-152	chr19	1864181	1864442	Promoter	promoter-TSS (NM_031918)	-746	NM_031918	83855	Hs.136280	NM_031918	ENSG00000129911	KLF16	BTEB4|DRRF|NSLP2	Kruppel like factor 16	protein-coding	9.85
chr20-62	chr20	63216214	63216483	Promoter	promoter-TSS (NM_017798)	-162	NM_017798	54915	Hs.744852	NM_017798	ENSG00000149658	YTHDF1	C20orf21	YTH N6-methyladenosine RNA binding protein 1	protein-coding	9.85
chr19-177	chr19	41262456	41262725	Promoter	TTS (NM_021913)	114	NM_144732	11100	Hs.155218	NM_007040	ENSG00000105323	HNRNPUL1	E1B-AP5|E1BAP5|HNRPUL1	heterogeneous nuclear ribonucleoprotein U like 1	protein-coding	9.85
chr11-122	chr11	61356036	61356305	Promoter	MER58A|DNA|hAT-Charlie	719	NM_001161452	220002	Hs.22546	NM_153611	ENSG00000162144	CYB561A3	CYBASC3|LCYTB	cytochrome b561 family member A3	protein-coding	9.85
chr1-327	chr1	183567583	183567852	Genebody	intron (NM_001190789, intron 5 of 12)	22887	NM_001190789	4688	Hs.587558	NM_000433	ENSG00000116701	NCF2	NCF-2|NOXA2|P67-PHOX|P67PHOX	neutrophil cytosolic factor 2	protein-coding	9.85
chr10-148	chr10	96705168	96705430	Genebody	intron (NM_152309, intron 2 of 16)	15223	NM_152309	118788	Hs.310456	NM_152309	ENSG00000155629	PIK3AP1	BCAP	phosphoinositide-3-kinase adaptor protein 1	protein-coding	9.84
chr10-141	chr10	104120851	104121113	Promoter	Intergenic	-1076	NM_145247	119392	Hs.93667	NM_145247	ENSG00000156384	SFR1	C10orf78|MEI5|MEIR5|bA373N18.1	SWI5 dependent homologous recombination repair protein 1	protein-coding	9.84
chr4-81	chr4	118278433	118278701	Promoter	promoter-TSS (NR_002963)	-195	NR_034010	100093630	Hs.535762	NR_003584	ENSG00000269893	SNHG8	LINC00060|NCRNA00060	small nucleolar RNA host gene 8	ncRNA	9.83
chr13-36	chr13	99420318	99420576	Intergenic	Intergenic	64316	NR_030353	693208		NR_030353	ENSG00000207719	MIR623	MIRN623|hsa-mir-623	microRNA 623	ncRNA	9.82
chr5-119	chr5	176537393	176537654	Promoter	promoter-TSS (NM_014901)	-103	NM_014901	22838	Hs.434888	NM_014901	ENSG00000146083	RNF44	-	ring finger protein 44	protein-coding	9.82
chr19-147	chr19	12985323	12985585	Intergenic	Intergenic	-10316	NM_002501	4784	Hs.257970	NM_002501	ENSG00000008441	NFIX	CTF|MRSHSS|NF-I/X|NF1-X|NF1A|SOTOS2	nuclear factor I X	protein-coding	9.81
chr7-106	chr7	100396745	100396974	Genebody	L1MB2|LINE|L1	23414	NM_178273	29992	Hs.444407	NM_013439	ENSG00000085514	PILRA	FDF03	paired immunoglobin like type 2 receptor alpha	protein-coding	9.8
chr8-98	chr8	29642193	29642462	Intergenic	MLT1H|LTR|ERVL-MaLR	105782	NR_026765	619351	Hs.566911	NR_026765	ENSG00000251191	LINC00589	C8orf75|TSLNC8	long intergenic non-protein coding RNA 589	ncRNA	9.79
chr5-90	chr5	160467031	160467293	Promoter	Intergenic	-1089	NR_132748	107075116	Hs.735831	NR_132748	ENSG00000253522	MIR3142HG	-	MIR3142 host gene	ncRNA	9.78
chr1-272	chr1	161314136	161314401	Promoter	promoter-TSS (NM_001278172)	-108	NM_001035513	6391	Hs.444472	NM_003001	ENSG00000143252	SDHC	CYB560|CYBL|PGL3|QPS1|SDH3	succinate dehydrogenase complex subunit C	protein-coding	9.78
chr2-142	chr2	46569317	46569548	Genebody	non-coding (NR_104182, exon 2 of 2)	10806	NR_104182	100506142	Hs.658541	NR_104182	ENSG00000250116	LOC100506142	-	uncharacterized LOC100506142	ncRNA	9.78
chr12-129	chr12	56127819	56128084	Promoter	promoter-TSS (NM_015292)	-251	NM_001184796	23344	Hs.632729	NM_015292	ENSG00000139641	ESYT1	FAM62A|MBC2	extended synaptotagmin 1	protein-coding	9.78
chr13-47	chr13	33110638	33110884	Genebody	exon (NM_001243476, exon 15 of 18)	75318	NM_001243466	90627	Hs.156551	NM_052851	ENSG00000133121	STARD13	ARHGAP37|DLC2|GT650|LINC00464	StAR related lipid transfer domain containing 13	protein-coding	9.77
chr2-207	chr2	42105937	42106146	Intergenic	Intergenic	58020	NM_138370	91461	Hs.408542	NM_138370	ENSG00000162878	PKDCC	SGK493|Vlk	protein kinase domain containing, cytoplasmic	protein-coding	9.77
chr5-118	chr5	157291486	157291755	Genebody	intron (NM_001291721, intron 3 of 29)	22278	NM_014376	26999	Hs.519702	NM_014376	ENSG00000055163	CYFIP2	PIR121	cytoplasmic FMR1 interacting protein 2	protein-coding	9.77
chr9-82	chr9	19127421	19127678	Promoter	promoter-TSS (NR_038064)	57	NR_038064	123	Hs.3416	NM_001122	ENSG00000147872	PLIN2	ADFP|ADRP	perilipin 2	protein-coding	9.77
chr2-140	chr2	45909728	45909997	Genebody	intron (NM_005400, intron 2 of 14)	257958	NM_005400	5581	Hs.580351	NM_005400	ENSG00000171132	PRKCE	PKCE|nPKC-epsilon	protein kinase C epsilon	protein-coding	9.77
chr2-253	chr2	109871202	109871471	Intergenic	Intergenic	-27096	NM_033514	96626	Hs.535619	NM_033514	ENSG00000256977	LIMS3	PINCH-3	LIM zinc finger domain containing 3	protein-coding	9.77
chr3-257	chr3	197298060	197298310	Promoter	promoter-TSS (NR_038289)	-62	NR_038289	100507086	Hs.636103	NR_038289	ENSG00000227375	DLG1-AS1	-	DLG1 antisense RNA 1	ncRNA	9.76
chr1-308	chr1	156746405	156746672	Genebody	MIR3|SINE|MIR	4755	NM_001319187	3068	Hs.743948	NM_004494	ENSG00000143321	HDGF	HMG1L2	heparin binding growth factor	protein-coding	9.76
chr1-355	chr1	34852697	34852950	Genebody	3' UTR (NM_138428, exon 2 of 2)	6222	NM_001164824	113444	Hs.27160	NM_138428	ENSG00000163866	SMIM12	C1orf212	small integral membrane protein 12	protein-coding	9.76
chr17-268	chr17	35119523	35119788	Promoter	non-coding (NR_037711, exon 1 of 9)	214	NM_133629	5892	Hs.631757	NM_002878	ENSG00000185379	RAD51D	BROVCA4|R51H3|RAD51L3|TRAD	RAD51 paralog D	protein-coding	9.75
[truncated: 3,166 more rows]

## Sheet: HepG2
Table S2. RAD51 binding sites identified in GM12878, HepG2, K562 or MCF-7 cells.
[truncated: 2,612 more rows]

## Sheet: K562
Table S2. RAD51 binding sites identified in GM12878, HepG2, K562 or MCF-7 cells.
[truncated: 7,193 more rows]

[truncated: 1 more sheets: MCF7]
